# Supplementary material
Source: publisher figshare collection journal article supplement (https://gsajournals.figshare.com/articles/dataset/_/25550775)
Supplement: Supplementary file 1 [file 1]

1 **SUPPLEMENTARY INFORMATION**

2 Table S1: List of cowpea accessions selected from the mini-core subset.

| S/N | Accession | Origin  | S/N | Accession | Origin   |
|-----|-----------|---------|-----|-----------|----------|
| 1   | TVu-8     | Nigeria | 27  | Tvu-5609  | Niger    |
| 2   | TVu-1583  | Nigeria | 28  | Tvu-14970 | Niger    |
| 3   | TVu-3969  | Nigeria | 29  | Tvu-14788 | Senegal  |
| 4   | TVu-2027  | Nigeria | 30  | Tvu-14406 | Senegal  |
| 5   | TVu-578   | Nigeria | 31  | Tvu-14336 | Senegal  |
| 6   | TVu-969   | Nigeria | 32  | TVu-14346 | Senegal  |
| 7   | TVu-5828  | Nigeria | 33  | TVu-14393 | Senegal  |
| 8   | TVu-6855  | Nigeria | 34  | TVu-12432 | Zambia   |
| 9   | TVu-4557  | Nigeria | 35  | TVu-13305 | Zambia   |
| 10  | TVu-7559  | Nigeria | 36  | TVu-13334 | Zambia   |
| 11  | TVu-10559 | Nigeria | 37  | TVu-15053 | Zambia   |
| 12  | TVu-10005 | Nigeria | 38  | TVu-13437 | Zambia   |
| 13  | TVu-14190 | Nigeria | 39  | TVu-14224 | Botswana |
| 14  | TVu-15653 | Nigeria | 40  | TVu-14272 | Botswana |
| 15  | TVu-16722 | Nigeria | 41  | TVu-15973 | Botswana |
| 16  | TVu-15315 | Chad    | 42  | TVu-14691 | Botswana |
| 17  | TVu-16430 | Chad    | 43  | TVu-14321 | Botswana |
| 18  | TVu-1477  | Mali    | 44  | TVu-9801  | Malawi   |
| 19  | TVu-7684  | Mali    | 45  | TVu-9866  | Malawi   |
| 20  | TVu-14539 | Mali    | 46  | TVu-15112 | Malawi   |
| 21  | TVu-16594 | Mali    | 47  | TVu-15143 | Malawi   |
| 22  | TVu-7625  | Mali    | 48  | TVu-13463 | Kenya    |
| 23  | TVu-5018  | Niger   | 49  | TVu-13485 | Kenya    |
| 24  | TVu-4984  | Niger   | 50  | TVu-15411 | Lesotho  |
| 25  | TVu-4711  | Niger   |     |           |          |
| 26  | TVu-6947  | Niger   |     |           |          |

3 S/N: Serial Number

5 Table S2: List of cowpea accessions selected from the FIGS subset.

| S/N | Accession | Origin  | S/N | Accession | Origin     |
|-----|-----------|---------|-----|-----------|------------|
| 1   | TVu-16954 | Nigeria | 27  | TVu-14991 | Niger      |
| 2   | TVu-16980 | Nigeria | 28  | TVu-14988 | Niger      |
| 3   | TVu-16989 | Nigeria | 29  | TVu-14344 | Senegal    |
| 4   | TVu-17000 | Nigeria | 30  | TVu-14404 | Senegal    |
| 5   | TVu-17009 | Nigeria | 31  | TVu-14462 | Senegal    |
| 6   | TVu-17018 | Nigeria | 32  | TVu-14815 | Senegal    |
| 7   | TVu-17024 | Nigeria | 33  | TVu-14834 | Senegal    |
| 8   | TVu-3739  | Nigeria | 34  | TVu-15047 | Zambia     |
| 9   | TVu-3746  | Nigeria | 35  | TVu-17057 | Zambia     |
| 10  | TVu-3768  | Nigeria | 36  | TVu-17128 | Zambia     |
| 11  | TVu-3951  | Nigeria | 37  | TVu-17147 | Zambia     |
| 12  | TVu-17010 | Nigeria | 38  | TVu-17114 | Zambia     |
| 13  | TVu-17030 | Nigeria | 39  | TVu-14895 | Botswana   |
| 14  | TVu-3890  | Nigeria | 40  | TVu-14897 | Botswana   |
| 15  | TVu-74    | Nigeria | 41  | TVu-14900 | Botswana   |
| 16  | TVu-15247 | Chad    | 42  | TVu-14902 | Botswana   |
| 17  | TVu-15256 | Chad    | 43  | TVu-15055 | Botswana   |
| 18  | TVu-15300 | Chad    | 44  | TVu-9908  | Malawi     |
| 19  | TVu-10881 | Mali    | 45  | TVu-9913  | Malawi     |
| 20  | TVu-14533 | Mali    | 46  | TVu-13014 | Madagascar |
| 21  | TVu-7639  | Mali    | 47  | TVu-11954 | Sudan      |
| 22  | TVu-14846 | Mali    | 48  | TVu-11967 | Sudan      |
| 23  | TVu-8244  | Mali    | 49  | TVu-11412 | Gambia     |
| 24  | TVu-14977 | Niger   | 50  | TVu-14152 | Kenya      |
| 25  | TVu-15000 | Niger   |     |           |            |
| 26  | TVu-15054 | Niger   |     |           |            |

6 S/N: Serial Number

Table S3: List of 11 droughts tolerant and 1 susceptible cowpea checks used for this study.

| S/N | Name                | Description      | Source                        |
|-----|---------------------|------------------|-------------------------------|
| 1   | TVu-803             | Drought Tolerant | Fatokun <i>et al.</i> , 2012  |
| 2   | TVu-557             | Drought Tolerant | Fatokun <i>et al.</i> , 2012  |
| 3   | TVu-1438            | Drought Tolerant | Fatokun <i>et al.</i> , 2012  |
| 4   | TVu4574             | Drought Tolerant | Fatokun <i>et al.</i> , 2012  |
| 5   | TVu-6443            | Drought Tolerant | Fatokun <i>et al.</i> , 2012  |
| 6   | TVu-11982           | Drought Tolerant | Fatokun <i>et al.</i> , 2012  |
| 7   | TVu-14676           | Drought Tolerant | Fatokun <i>et al.</i> , 2012  |
| 8   | TVu-11986           | Drought Tolerant | Agbicodo <i>et al.</i> , 2009 |
| 9   | IT99K-494-6         | Drought Tolerant | Agbicodo <i>et al.</i> , 2009 |
| 10  | IT98K-506-1         | Drought Tolerant | Agbicodo <i>et al.</i> , 2009 |
| 11  | Dan Ila (Tvu-17360) | Drought Tolerant | Standard                      |
| 12  | TVu-7778            | Susceptible      | Standard                      |

S/N: Serial Number

12 Table S4: Agronomic traits and mode of observation for 112 Cowpea accessions under well-  
 13 watered and water-stressed conditions.

| Serial<br>Number | Traits                          | Mode of observation                                                                   |
|------------------|---------------------------------|---------------------------------------------------------------------------------------|
| 1                | Days to first flowering         | Number of days from planting to emergence of the first flower in a plot               |
| 2                | Days to 50% flowering           | Number of days from planting to 50% flower emergence per plot                         |
| 3                | Pod weight (g)                  | Total dried pods harvested per plot and weighed                                       |
| 4                | Number of Pods per Plant        | Total number of pods harvested per individual plant and summed up per plot            |
| 5                | Total seed weight (g)           | Total weight of seed per plot after threshing of pods.                                |
| 6                | Grain yield (g/m <sup>2</sup> ) | Total grain weight per plot / Plot Area harvested.<br>Where Plot Area is 1 m x 0.75 m |
| 7                | Above ground biomass (g)        | Recorded as total pod weight per plot plus total shoot biomass per plot               |

14 Source: Bioversity International descriptors for Cowpea, 2010

15

16 Table S5: List of environments derived from water regime, location and year.  
 17

| S/N | Location | Water Regime   | Year of Evaluation | Environments |
|-----|----------|----------------|--------------------|--------------|
| 1   | Ibadan   | Well-watered   | 2020               | 1            |
| 2   | Ibadan   | Well-watered   | 2021               | 2            |
| 3   | Ikenne   | Well-watered   | 2020               | 3            |
| 4   | Ikenne   | Well-watered   | 2021               | 4            |
| 5   | Kano     | Well-watered   | 2021               | 5            |
| 6   | Kano     | Well-watered   | 2022               | 6            |
| 7   | Ibadan   | Water-stressed | 2020               | 7            |
| 8   | Ibadan   | Water-stressed | 2021               | 8            |
| 9   | Ikenne   | Water-stressed | 2020               | 9            |
| 10  | Ikenne   | Water-stressed | 2021               | 10           |
| 11  | Kano     | Water-stressed | 2021               | 11           |
| 12  | Kano     | Water-stressed | 2022               | 12           |

18

Table S6: Mean squares values from combined analysis of variance of agronomic traits measured under well-watered conditions in Ibadan 2020 & 2021, Ikenne 2020 & 2021 and Kano 2021 & 2022.

| S.V                           | Accession | Environment (ENV) | Rep (ENV) | BLK (Rep × ENV) | Accession × ENV | Error   | Heritability (H <sup>2</sup> ) (%) |
|-------------------------------|-----------|-------------------|-----------|-----------------|-----------------|---------|------------------------------------|
| D.F                           | 111       | 5                 | 12        | 234             | 544             | 969     |                                    |
| D1FLR                         | 196.54**  | 42960**           | 362.32**  | 48.42**         | 98.42**         | 31.19   | 53                                 |
| D50FLR                        | 281.09**  | 44808**           | 287.83**  | 90.57**         | 141.47**        | 66.62   | 51                                 |
| PdWt (g)                      | 38976**   | 267717**          | 18676**   | 3920.52**       | 6156.14**       | 2733.9  | 86                                 |
| Nopdplt                       | 5904.62** | 178578**          | 10120**   | 1254.56**       | 1873.98**       | 937.07  | 72                                 |
| TSWt (g)                      | 16662**   | 114751**          | 5034.79** | 1903.62**       | 2830.39**       | 1380.16 | 85                                 |
| Grain Yld (g/m <sup>2</sup> ) | 29754**   | 208620**          | 8974.57** | 3360.39**       | 5033.15**       | 2449.21 | 85                                 |
| AbvgBMss (g)                  | 379692**  | 4987634**         | 136798    | 75398**         | 82691**         | 43881.2 | 80                                 |

\*, \*\*, Significant at 0.05 and 0.01 probability levels, respectively

Abbreviations: S.V: Source of variation, Rep: Replicate, BLK: Block, ENV: Environment, D.F: Degree of freedom, D1FLR: Days to first flower, D50FLR: Days to 50% flowering, PdWt: Pod weight, Nopdplt: Number of pods per plant, TSWt: Total Seed weight, Grain Yld: Grain Yield, AbvgBMss: Above ground Biomass

Table S7: Mean square values from combined analysis of variance of agronomic traits measured under water-stressed conditions in Ibadan 2020 & 2021, Ikenne 2020 & 2021 and Kano 2021 & 2022

| S.V                           | Accession | Environment (ENV) | Rep (ENV) | BLK (Rep × ENV) | Accession × ENV | Error   | Heritability (H <sup>2</sup> ) (%) |
|-------------------------------|-----------|-------------------|-----------|-----------------|-----------------|---------|------------------------------------|
| D.F                           | 111       | 5                 | 12        | 234             | 541             | 959     |                                    |
| D1FLR                         | 210.39**  | 38558**           | 190.02**  | 41.24**         | 76.53**         | 19.54   | 65                                 |
| D50FLR                        | 207.94**  | 38112**           | 206.26**  | 38.15**         | 77.59**         | 22.09   | 64                                 |
| PdWt (g)                      | 11560**   | 135990**          | 13932**   | 2289.00**       | 2917.75**       | 478.06  | 80                                 |
| Nopdplt                       | 3822.04** | 42278**           | 5602.88** | 983.69**        | 1221.32**       | 716.06  | 73                                 |
| TSWt (g)                      | 5344.54** | 66261**           | 5890.18** | 1191.11**       | 1424.04**       | 499.82  | 78                                 |
| Grain Yld (g/m <sup>2</sup> ) | 9400.74** | 118796**          | 10812**   | 2098.66**       | 2509.24**       | 899.29  | 79                                 |
| AbvgBMss (g)                  | 141966**  | 6295416**         | 394028**  | 46351**         | 59731**         | 33389.8 | 64                                 |

\*, \*\*, Significant at 0.05 and 0.01 probability levels, respectively

**Abbreviations:** S.V: Source of variation, Rep: Replicate, BLK: Block, ENV: Environment, D.F: Degree of freedom, D1FLR: Days to first flower, D50FLR: Days to 50% flowering, PdWt: Pod weight, Nopdplt: Number of pods per plant, TSWt: Total Seed weight, Grain Yld: Grain Yield, AbvgBMss: Aboveground Biomass

Table S8: Mean square values from the combined analysis of variance of photosynthetic traits observed before stress imposition in Ibadan 2020 & 2021, Ikenne 2020 & 2021, Kano 2020 & 2021 and during stress imposition Ibadan 2020 & 2021, Ikenne 2021 and Kano 2021.

| BEFORE STRESS IMPOSITION |      |            |            |                    |                       |                    |         |                     |         |
|--------------------------|------|------------|------------|--------------------|-----------------------|--------------------|---------|---------------------|---------|
| Source                   | DF   | RCC        | Leaf Angle | LTD                | LEF                   | NPQt               | ΦPSII   | ΦNO                 | ΦNPQ    |
| Accession                | 111  | 108.56**   | 109.259**  | 4.62**             | 1479.84 <sup>ns</sup> | 0.96**             | 0.003** | 0.003**             | 0.008** |
| ENV                      | 5    | 4675.40**  | 9524.908** | 307.68**           | 614107**              | 93.23**            | 2.78**  | 0.101**             | 3.200** |
| Rep (ENV)                | 12   | 381.23**   | 546.872**  | 40.39**            | 27718**               | 2.13**             | 0.013** | 0.008**             | 0.035** |
| Block                    |      |            |            |                    |                       |                    |         |                     |         |
| (Rep*ENV)                | 234  | 45.70**    | 117.160**  | 8.35**             | 3120.75**             | 0.67 <sup>ns</sup> | 0.002** | 0.002**             | 0.005** |
| Accession*ENV            | 551  | 52.21**    | 84.469     | 2.14 <sup>ns</sup> | 1150.65               | 0.65**             | 0.001*  | 0.002               | 0.004   |
| Error                    | 1027 | 32.31      | 5.797      | 1.99               | 1157.70               | 0.56               | 0.001   | 0.001               | 0.003   |
| H <sup>2</sup> (%)       |      | 45         | 1          | 61                 | 6                     | 24                 | 55      | 43                  | 57      |
| DURING STRESS IMPOSITION |      |            |            |                    |                       |                    |         |                     |         |
| Accession                | 111  | 421.97**   | 81.53*     | 6.60**             | 4266.57**             | 64.20**            | 0.016** | 0.005**             | 0.036** |
| ENV                      | 3    | 26920.61** | 17039.65** | 1174.01**          | 1311511.06**          | 11074.70**         | 2.338** | 0.909**             | 6.070** |
| Rep (ENV)                | 8    | 2969.34**  | 1411.18**  | 495.18**           | 265886.59**           | 504.19**           | 0.553** | 0.137**             | 1.221** |
| BLK (Rep*ENV)            | 156  | 213.35**   | 82.814*    | 9.29**             | 4944.06**             | 46.75              | 0.012** | 0.003 <sup>ns</sup> | 0.024** |
| Accession*ENV            | 333  | 224.39**   | 71.165     | 5.57**             | 4415.18**             | 49.47              | 0.013** | 0.004**             | 0.028** |
| Error                    | 729  | 133.15     | 65.07      | 3.32               | 2650.16               | 39.76              | 0.008   | 0.002               | 0.016   |
| H <sup>2</sup> (%)       |      | 50         | 8          | -                  | 1                     | 27                 | 23      | 28                  | 26      |

\*, \*\*, Significant at 0.05 and 0.01 probability levels, respectively

**Abbreviations:** S.V: Source of variation, Rep: Replicate, BLK: Block, ENV: Environment, H<sup>2</sup> (RCC: Relative Chlorophyll Content, LTD: Leaf Temperature Differential, LEF: Linear Electron Flow, NPQt: Non-photochemical quenching, ΦPSII: Quantum yield of photosystem II, ΦNO: Ratio of incoming light lost, ΦNPQ: Ratio of incoming light towards non-photochemical quenching



48 Table S9: SNP markers associated with photosynthetic traits measured before stress imposition.

| Traits     | S/N | SNP Marker                  | Chromosome | Position | P.value  | Effect  | -log10p |
|------------|-----|-----------------------------|------------|----------|----------|---------|---------|
| Leaf Angle | 1   | 35154506 F 0-48:G>A-48:G>A  | VU10       | 33692003 | 3.51E-05 | -2.0617 | 4.45528 |
|            | 2   | 35152679 F 0-40:T>C-40:T>C  | VU05       | 32241457 | 0.00015  | 1.72325 | 3.82802 |
|            | 3   | 14074646 F 0-6:C>T-6:C>T    | VU03       | 12499389 | 0.00024  | 3.0124  | 3.61599 |
| LEF        | 4   | 25366687 F 0-10:T>C-10:T>C  | VU08       | 34708837 | 9.59E-05 | -8.3174 | 4.01808 |
|            | 5   | 14075197 F 0-48:G>A-48:G>A  | VU02       | 33630594 | 0.00015  | 11.4551 | 3.83426 |
|            | 6   | 14084862 F 0-6:A>G-6:A>G    | VU01       | 28902707 | 0.00021  | 7.04258 | 3.6789  |
|            | 7   | 14081982 F 0-8:T>A-8:T>A    | VU08       | 34706496 | 0.00043  | -8.2264 | 3.37083 |
|            | 8   | 14074604 F 0-52:T>C-52:T>C  | VU11       | 337646   | 0.00045  | -9.7617 | 3.34408 |
|            | 9   | 100012097 F 0-16:T>A-16:T>A | VU05       | 43316282 | 0.0005   | 10.0336 | 3.30368 |
|            | 10  | 35153123 F 0-41:T>G-41:T>G  | VU01       | 30355102 | 0.00054  | 6.51871 | 3.27137 |
|            | 11  | 14076321 F 0-57:C>T-57:C>T  | VU02       | 33628601 | 0.00054  | 8.96522 | 3.264   |
| NPQt       | 12  | 14086036 F 0-18:G>A-18:G>A  | VU10       | 21387851 | 0.00017  | -0.085  | 3.78186 |
|            | 13  | 42215970 F 0-58:C>T-58:C>T  | VU01       | 20107269 | 0.0004   | 0.31148 | 3.39689 |
|            | 14  | 14077745 F 0-9:C>T-9:C>T    | VU06       | 13636758 | 0.00055  | 0.19384 | 3.26008 |
| Phi2       | 15  | 28497847 F 0-58:G>A-58:G>A  | VU08       | 29649779 | 1.95E-05 | 0.00721 | 4.71071 |
|            | 16  | 14083120 F 0-30:T>C-30:T>C  | VU03       | 1855507  | 0.00021  | 0.00797 | 3.66995 |
|            | 17  | 14087468 F 0-39:C>T-39:C>T  | VU05       | 1982113  | 0.00035  | -0.0059 | 3.45407 |
|            | 18  | 35154661 F 0-23:G>T-23:G>T  | VU02       | 2168260  | 0.00041  | 0.0094  | 3.38525 |
| PhiNO      | 19  | 14087183 F 0-8:G>C-8:G>C    | VU04       | 29274851 | 0.00051  | 0.00464 | 3.29617 |
|            | 20  | 14082287 F 0-10:T>C-10:T>C  | VU10       | 33282962 | 7.53E-05 | -0.0145 | 4.1234  |
|            | 21  | 14084966 F 0-21:T>C-21:T>C  | VU10       | 33282470 | 9.98E-05 | 0.01082 | 4.00099 |
|            | 22  | 14073827 F 0-12:A>T-12:A>T  | VU07       | 21993383 | 0.0001   | 0.01572 | 3.98969 |
|            | 23  | 14073619 F 0-32:T>A-32:T>A  | VU07       | 21877904 | 0.0001   | -0.0157 | 3.98969 |
|            | 24  | 42215292 F 0-60:T>A-60:T>A  | VU07       | 24318383 | 0.0002   | 0.01405 | 3.70522 |
|            | 25  | 14075164 F 0-15:G>T-15:G>T  | VU10       | 33258761 | 0.00023  | 0.0113  | 3.63082 |
|            | 26  | 14075587 F 0-24:G>A-24:G>A  | VU07       | 24248530 | 0.00032  | 0.01432 | 3.50121 |
| PhiNPQ     | 27  | 14085608 F 0-15:G>A-15:G>A  | VU10       | 33257375 | 0.00041  | 0.01058 | 3.38245 |
|            | 28  | 14074064 F 0-6:C>A-6:C>A    | VU10       | 33762521 | 0.00055  | 0.00827 | 3.26021 |
|            | 29  | 100059639 F 0-22:G>A-22:G>A | VU10       | 23347554 | 0.00018  | 0.01894 | 3.75458 |
|            | 30  | 42215292 F 0-60:T>A-60:T>A  | VU07       | 24318383 | 0.00019  | -0.0189 | 3.71206 |
|            | 31  | 14087590 F 0-26:T>C-26:T>C  | VU04       | 21345582 | 0.00023  | -0.0144 | 3.63433 |
|            | 32  | 14075587 F 0-24:G>A-24:G>A  | VU07       | 24248530 | 0.00024  | -0.0196 | 3.62533 |

49

50

51 Table S10: SNP markers associated with photosynthetic traits measured during stress imposition.

| Traits     | S/N | SNP Marker                 | Chromosome | Position | P.value  | Effect   | -log10p  |
|------------|-----|----------------------------|------------|----------|----------|----------|----------|
| RCC        | 1   | 14082437 F 0-23:A>C-23:A>C | VU05       | 9223414  | 5.43E-05 | 3.332864 | 4.2651   |
|            | 2   | 35154106 F 0-46:T>C-46:T>C | VU04       | 28508873 | 7.53E-05 | -4.48374 | 4.123022 |
|            | 3   | 14075625 F 0-53:A>T-53:A>T | VU04       | 40215362 | 0.000289 | -3.32201 | 3.539607 |
|            | 4   | 14075687 F 0-54:A>G-54:A>G | VU09       | 42091154 | 0.000505 | -6.69966 | 3.296898 |
| Leaf Angle | 5   | 35154437 F 0-23:A>G-23:A>G | VU02       | 7708621  | 0.000115 | -4.08604 | 3.938036 |
|            | 6   | 28497458 F 0-43:C>A-43:C>A | VU01       | 38076734 | 0.00047  | 3.414896 | 3.327834 |
|            | 7   | 25363555 F 0-67:T>A-67:T>A | VU08       | 7475709  | 0.000491 | -1.56435 | 3.308539 |
|            | 8   | 14082981 F 0-61:C>G-61:C>G | VU11       | 35410816 | 0.000493 | 1.759239 | 3.307571 |
| LEF        | 9   | 14074911 F 0-19:A>C-19:A>C | VU05       | 46903094 | 0.000505 | 2.049759 | 3.296859 |
|            | 10  | 25355835 F 0-14:C>G-14:C>G | VU03       | 689150   | 9.39E-05 | 14.31185 | 4.02718  |
|            | 11  | 28203013 F 0-9:A>G-9:A>G   | VU10       | 32807703 | 0.000226 | 7.269981 | 3.645913 |
|            | 12  | 14056866 F 0-39:T>A-39:T>A | VU09       | 36208899 | 0.000234 | 11.79372 | 3.631711 |
| LTD        | 13  | 42215649 F 0-18:G>A-18:G>A | VU11       | 29035476 | 0.000279 | 18.0569  | 3.554977 |
|            | 14  | 14082886 F 0-62:G>T-62:G>T | VU06       | 20520148 | 0.00033  | -21.9831 | 3.481662 |
|            | 15  | 14055923 F 0-18:T>C-18:T>C | VU02       | 32058018 | 0.000405 | 10.85694 | 3.392965 |
|            | 16  | 14087611 F 0-10:G>A-10:G>A | VU07       | 38232938 | 0.000428 | 7.050293 | 3.368852 |
| LTD        | 17  | 14077445 F 0-12:G>A-12:G>A | VU05       | 43318921 | 0.000538 | 8.957021 | 3.269548 |
|            | 18  | 25363858 F 0-36:T>C-36:T>C | VU02       | 23829221 | 0.000556 | -8.90222 | 3.255247 |
|            | 19  | 25354011 F 0-63:T>A-63:T>A | VU04       | 36172186 | 4.61E-05 | -0.57752 | 4.33618  |
|            | 20  | 25354011 F 0-6:T>C-6:T>C   | VU04       | 36172186 | 0.000171 | -0.63189 | 3.767947 |
| LTD        | 21  | 14077371 F 0-45:C>T-45:C>T | VU01       | 28885381 | 0.000267 | 0.813972 | 3.573435 |
|            | 22  | 14082884 F 0-64:G>C-64:G>C | VU04       | 36150435 | 0.000282 | -0.4219  | 3.550175 |
|            | 23  | 14074608 F 0-24:C>T-24:C>T | VU08       | 5902475  | 0.000458 | 0.392288 | 3.339261 |
|            | 24  | 42215484 F 0-60:T>C-60:T>C | VU01       | 28607302 | 0.000461 | -0.80312 | 3.33593  |
| LTD        | 25  | 35154947 F 0-39:C>T-39:C>T | VU10       | 11279555 | 0.000468 | 0.621432 | 3.330078 |
|            | 26  | 14081761 F 0-65:T>G-65:T>G | VU05       | 1398660  | 0.000547 | 0.575115 | 3.262068 |
|            | 27  | 14085634 F 0-45:A>G-45:A>G | VU05       | 1706850  | 0.00056  | 0.713402 | 3.252187 |
|            | 28  | 14076589 F 0-32:C>T-32:C>T | VU05       | 15017004 | 8.12E-05 | 0.9248   | 4.090191 |
| NPQr       | 29  | 14075950 F 0-42:T>C-42:T>C | VU10       | 29849202 | 0.000152 | -1.17676 | 3.8193   |
|            | 30  | 35153664 F 0-9:T>C-9:T>C   | VU07       | 34487122 | 0.000258 | 2.129861 | 3.588028 |
|            | 31  | 14085225 F 0-18:C>T-18:C>T | VU07       | 6479339  | 0.00036  | -1.43802 | 3.443847 |
|            | 32  | 14084282 F 0-14:G>C-14:G>C | VU07       | 4745348  | 0.000414 | 1.348756 | 3.382554 |
| Phi2       | 33  | 14077445 F 0-12:G>A-12:G>A | VU05       | 43318921 | 0.000235 | 0.02035  | 3.628108 |
| PhiNO      | 34  | 25364932 F 0-32:C>A-32:C>A | VU07       | 37527811 | 0.000358 | -0.02744 | 3.446616 |
|            | 35  | 14086611 F 0-37:C>G-37:C>G | VU11       | 30566812 | 0.000539 | 0.023394 | 3.268408 |
|            | 36  | 14086611 F 0-46:G>T-46:G>T | VU11       | 30566812 | 0.000539 | 0.023394 | 3.268408 |
| PhiNPQ     | 37  | 14077445 F 0-12:G>A-12:G>A | VU05       | 43318921 | 0.000139 | -0.03116 | 3.858377 |
|            | 38  | 25353929 F 0-50:G>A-50:G>A | VU05       | 43418353 | 0.000384 | -0.02735 | 3.415326 |
|            | 39  | 25355835 F 0-14:C>G-14:C>G | VU03       | 689150   | 0.000536 | -0.04067 | 3.27103  |
|            | 40  | 25364932 F 0-32:C>A-32:C>A | VU07       | 37527811 | 0.000561 | 0.070128 | 3.251189 |

53 Table S11: SNP markers associated with agronomic traits under well-watered conditions.

| Traits  | S/N | SNP Marker                 | Chromosome | Position | P.value  | Effect   | -log10p  |
|---------|-----|----------------------------|------------|----------|----------|----------|----------|
| D1FLR   | 1   | 14083458 F 0-15:A>T-15:A>T | VU05       | 37821251 | 0.000349 | 2.696274 | 3.456581 |
|         | 2   | 14077654 F 0-34:T>G-34:T>G | VU07       | 16133528 | 0.000373 | 2.732358 | 3.428093 |
| D50FLR  | 3   | 14077654 F 0-34:T>G-34:T>G | VU07       | 16133528 | 0.0003   | 3.15119  | 3.522373 |
|         | 4   | 14078784 F 0-33:G>A-33:G>A | VU08       | 27442505 | 0.000332 | -4.8069  | 3.479329 |
| PDWT    | 5   | 14074811 F 0-12:G>A-12:G>A | VU04       | 39340965 | 1.18E-05 | -79.8246 | 4.926399 |
|         | 6   | 14055805 F 0-23:C>G-23:C>G | VU08       | 34011908 | 2.48E-05 | 83.08417 | 4.605517 |
|         | 7   | 14056089 F 0-34:G>A-34:G>A | VU03       | 57303579 | 4.46E-05 | 134.7355 | 4.350602 |
|         | 8   | 14057278 F 0-16:C>T-16:C>T | VU11       | 36490988 | 4.46E-05 | 67.36777 | 4.350602 |
|         | 9   | 14056174 F 0-48:G>A-48:G>A | VU08       | 30941799 | 7.85E-05 | 88.51787 | 4.105117 |
|         | 10  | 14084697 F 0-30:C>G-30:C>G | VU04       | 42160393 | 9.53E-05 | 23.97369 | 4.020709 |
|         | 11  | 14077131 F 0-57:C>T-57:C>T | VU03       | 1072861  | 0.000161 | 43.10597 | 3.792178 |
|         | 12  | 14085596 F 0-23:A>G-23:A>G | VU03       | 1092128  | 0.000161 | 43.10597 | 3.792178 |
|         | 13  | 14073733 F 0-16:G>A-16:G>A | VU03       | 1081086  | 0.000175 | -42.0296 | 3.756928 |
|         | 14  | 14075093 F 0-47:G>A-47:G>A | VU04       | 36182035 | 0.00022  | -52.1092 | 3.656867 |
|         | 15  | 25356357 F 0-53:A>G-53:A>G | VU07       | 17328027 | 0.000228 | 32.10753 | 3.641944 |
|         | 16  | 14077339 F 0-28:T>C-28:T>C | VU04       | 42181325 | 0.000276 | -22.4295 | 3.558594 |
|         | 17  | 14057194 F 0-42:A>T-42:A>T | VU01       | 38317304 | 0.000381 | 37.66215 | 3.418543 |
|         | 18  | 35153037 F 0-31:G>A-31:G>A | VU10       | 10192254 | 0.000393 | 32.56727 | 3.405392 |
|         | 19  | 25352714 F 0-46:A>G-46:A>G | VU10       | 38128958 | 0.000404 | 30.04746 | 3.39415  |
|         | 20  | 14084697 F 0-30:C>G-30:C>G | VU04       | 42160393 | 2.10E-05 | 11.68483 | 4.677021 |
| NoPdPlt | 21  | 14077339 F 0-28:T>C-28:T>C | VU04       | 42181325 | 5.70E-05 | -11.1106 | 4.244128 |
|         | 22  | 35153037 F 0-31:G>A-31:G>A | VU10       | 10192254 | 0.000114 | 15.81056 | 3.942024 |
|         | 23  | 14056174 F 0-48:G>A-48:G>A | VU08       | 30941799 | 0.000327 | 35.52035 | 3.485124 |
|         | 24  | 14056089 F 0-34:G>A-34:G>A | VU03       | 57303579 | 0.000501 | 51.28694 | 3.300348 |
|         | 25  | 14057278 F 0-16:C>T-16:C>T | VU11       | 36490988 | 0.000501 | 25.64347 | 3.300348 |
|         | 26  | 14074811 F 0-12:G>A-12:G>A | VU04       | 39340965 | 1.36E-05 | -53.5876 | 4.867846 |
| TSWT    | 27  | 14055805 F 0-23:C>G-23:C>G | VU08       | 34011908 | 2.18E-05 | 56.78362 | 4.661407 |
|         | 28  | 14077131 F 0-57:C>T-57:C>T | VU03       | 1072861  | 0.000113 | 29.78145 | 3.946573 |
|         | 29  | 14085596 F 0-23:A>G-23:A>G | VU03       | 1092128  | 0.000113 | 29.78145 | 3.946573 |
|         | 30  | 14056089 F 0-34:G>A-34:G>A | VU03       | 57303579 | 0.000143 | 85.25239 | 3.844948 |
|         | 31  | 14057278 F 0-16:C>T-16:C>T | VU11       | 36490988 | 0.000143 | 42.6262  | 3.844948 |
|         | 32  | 14073733 F 0-16:G>A-16:G>A | VU03       | 1081086  | 0.000145 | -28.6693 | 3.837482 |
|         | 33  | 14075093 F 0-47:G>A-47:G>A | VU04       | 36182035 | 0.000192 | -35.548  | 3.716265 |
|         | 34  | 14084697 F 0-30:C>G-30:C>G | VU04       | 42160393 | 0.000293 | 14.95105 | 3.533342 |
|         | 35  | 25352714 F 0-46:A>G-46:A>G | VU10       | 38128958 | 0.000424 | 20.3203  | 3.372257 |
|         | 36  | 25356357 F 0-53:A>G-53:A>G | VU07       | 17328027 | 0.000444 | 21.18694 | 3.353005 |
|         | 37  | 14077339 F 0-28:T>C-28:T>C | VU04       | 42181325 | 0.000473 | -14.5417 | 3.325457 |
|         | 38  | 14074811 F 0-12:G>A-12:G>A | VU04       | 39340965 | 1.52E-05 | -71.2002 | 4.818859 |
| YLD     | 39  | 14055805 F 0-23:C>G-23:C>G | VU08       | 34011908 | 2.43E-05 | 75.50122 | 4.613552 |
|         | 40  | 14077131 F 0-57:C>T-57:C>T | VU03       | 1072861  | 0.000109 | 39.88125 | 3.962977 |

|          |    |                            |      |          |          |          |          |
|----------|----|----------------------------|------|----------|----------|----------|----------|
| AbvgBmss | 41 | 14085596 F 0-23:A>G-23:A>G | VU03 | 1092128  | 0.000109 | 39.88125 | 3.962977 |
|          | 42 | 14073733 F 0-16:G>A-16:G>A | VU03 | 1081086  | 0.000138 | -38.4161 | 3.859163 |
|          | 43 | 14056089 F 0-34:G>A-34:G>A | VU03 | 57303579 | 0.000148 | 114.0616 | 3.828563 |
|          | 44 | 14057278 F 0-16:C>T-16:C>T | VU11 | 36490988 | 0.000148 | 57.03082 | 3.828563 |
|          | 45 | 14075093 F 0-47:G>A-47:G>A | VU04 | 36182035 | 0.000218 | -47.0673 | 3.660922 |
|          | 46 | 14084697 F 0-30:C>G-30:C>G | VU04 | 42160393 | 0.000275 | 20.08584 | 3.560036 |
|          | 47 | 25356357 F 0-53:A>G-53:A>G | VU07 | 17328027 | 0.000392 | 28.82135 | 3.406819 |
|          | 48 | 25352714 F 0-46:A>G-46:A>G | VU10 | 38128958 | 0.000438 | 27.1339  | 3.358751 |
|          | 49 | 14077339 F 0-28:T>C-28:T>C | VU04 | 42181325 | 0.000445 | -19.5429 | 3.351919 |
|          | 50 | 14074811 F 0-12:G>A-12:G>A | VU04 | 39340965 | 2.63E-05 | -202.243 | 4.57956  |
|          | 51 | 14056089 F 0-34:G>A-34:G>A | VU03 | 57303579 | 0.000135 | 331.0125 | 3.869027 |
|          | 52 | 14057278 F 0-16:C>T-16:C>T | VU11 | 36490988 | 0.000135 | 165.5062 | 3.869027 |
|          | 53 | 14055805 F 0-23:C>G-23:C>G | VU08 | 34011908 | 0.000181 | 193.314  | 3.741659 |
|          | 54 | 28203121 F 0-13:G>T-13:G>T | VU08 | 30941579 | 0.000305 | 73.33933 | 3.516317 |
|          | 55 | 14075084 F 0-26:C>T-26:C>T | VU02 | 33172906 | 0.000307 | 78.35813 | 3.512526 |
|          | 56 | 14081796 F 0-46:T>C-46:T>C | VU10 | 967360   | 0.000436 | -128.243 | 3.360687 |
|          | 57 | 35154756 F 0-7:C>T-7:C>T   | VU03 | 331738   | 0.000487 | 75.05848 | 3.312884 |

54

55

56 Table S12: SNP markers associated with agronomic traits under water-stressed conditions.

| Traits  | S/N | SNP Marker                 | Chromosome | Position | P.value  | Effect   | -log10p  |
|---------|-----|----------------------------|------------|----------|----------|----------|----------|
| D1FLR   | 1   | 35154477 F 0-68:G>A-68:G>A | VU03       | 1993882  | 6.26E-05 | -4.58663 | 4.203313 |
|         | 2   | 42215302 F 0-22:C>G-22:C>G | VU09       | 41395527 | 0.000131 | 3.846411 | 3.881625 |
|         | 3   | 14073701 F 0-38:A>C-38:A>C | VU09       | 1587729  | 0.000191 | -2.47458 | 3.718222 |
|         | 4   | 14082267 F 0-29:T>C-29:T>C | VU11       | 4317445  | 0.000262 | -3.44116 | 3.580882 |
| D50FLR  | 5   | 35154477 F 0-68:G>A-68:G>A | VU03       | 1993882  | 2.30E-05 | -4.78485 | 4.639214 |
|         | 6   | 42215302 F 0-22:C>G-22:C>G | VU09       | 41395527 | 4.62E-05 | 4.042261 | 4.335262 |
|         | 7   | 14073701 F 0-38:A>C-38:A>C | VU09       | 1587729  | 8.32E-05 | -2.57178 | 4.0798   |
|         | 8   | 14082267 F 0-29:T>C-29:T>C | VU11       | 4317445  | 0.000142 | -3.53056 | 3.849187 |
| PDWT    | 9   | 42215513 F 0-19:G>A-19:G>A | VU07       | 23434856 | 0.000362 | -4.9259  | 3.44103  |
|         | 10  | 25364251 F 0-67:T>C-67:T>C | VU09       | 7109840  | 0.000376 | 2.566323 | 3.425238 |
|         | 11  | 14075804 F 0-37:G>A-37:G>A | VU06       | 17922321 | 0.000473 | -3.0832  | 3.32499  |
|         | 12  | 14074811 F 0-12:G>A-12:G>A | VU04       | 39340965 | 7.08E-07 | -60.9071 | 6.149813 |
|         | 13  | 14055805 F 0-23:C>G-23:C>G | VU08       | 34011908 | 2.50E-06 | 62.27293 | 5.601677 |
|         | 14  | 14075093 F 0-47:G>A-47:G>A | VU04       | 36182035 | 6.50E-05 | -37.626  | 4.187363 |
|         | 15  | 14082590 F 0-36:A>T-36:A>T | VU09       | 17208919 | 0.000159 | 51.14463 | 3.799786 |
|         | 16  | 100011421 F 0-9:A>G-9:A>G  | VU03       | 4284517  | 0.000183 | 78.90853 | 3.738095 |
|         | 17  | 100046154 F 0-6:C>T-6:C>T  | VU03       | 20546099 | 0.000299 | 34.29401 | 3.524952 |
|         | 18  | 14056089 F 0-34:G>A-34:G>A | VU03       | 57303579 | 0.000313 | 77.76086 | 3.504904 |
|         | 19  | 14057278 F 0-16:C>T-16:C>T | VU11       | 36490988 | 0.000313 | 38.88043 | 3.504904 |
|         | 20  | 14057194 F 0-42:A>T-42:A>T | VU01       | 38317304 | 0.000515 | 0.05102  | 3.308847 |
| NoPdPlt | 21  | 14074179 F 0-36:T>A-36:T>A | VU11       | 552867   | 0.000388 | -25.6114 | 3.411282 |
|         | 22  | 42215328 F 0-32:G>A-32:G>A | VU05       | 35892185 | 0.000408 | -18.6213 | 3.389192 |
|         | 23  | 14074811 F 0-12:G>A-12:G>A | VU04       | 39340965 | 4.87E-06 | -35.211  | 5.312246 |
|         | 24  | 14055805 F 0-23:C>G-23:C>G | VU08       | 34011908 | 5.39E-05 | 33.33024 | 4.268373 |
|         | 25  | 14057194 F 0-42:A>T-42:A>T | VU01       | 38317304 | 0.000123 | 17.22971 | 3.910947 |
|         | 26  | 100046154 F 0-6:C>T-6:C>T  | VU03       | 20546099 | 0.000124 | 23.40486 | 3.90748  |
|         | 27  | 14056089 F 0-34:G>A-34:G>A | VU03       | 57303579 | 0.000227 | 50.78829 | 3.644171 |
|         | 28  | 14057278 F 0-16:C>T-16:C>T | VU11       | 36490988 | 0.000227 | 25.39414 | 3.644171 |
|         | 29  | 14059384 F 0-29:G>A-29:G>A | VU04       | 42146683 | 0.000315 | 9.204232 | 3.501735 |
|         | 30  | 14055483 F 0-57:G>A-57:G>A | VU01       | 38316892 | 0.000385 | -15.1799 | 3.414522 |
| TSWT    | 31  | 14076546 F 0-14:G>T-14:G>T | VU11       | 36491054 | 0.0005   | 16.655   | 3.301325 |
|         | 32  | 14074811 F 0-12:G>A-12:G>A | VU04       | 39340965 | 1.05E-06 | -40.8925 | 5.977667 |
|         | 33  | 14055805 F 0-23:C>G-23:C>G | VU08       | 34011908 | 2.98E-06 | 42.20856 | 5.52616  |
|         | 34  | 14075093 F 0-47:G>A-47:G>A | VU04       | 36182035 | 3.87E-05 | -26.5801 | 4.411924 |
|         | 35  | 100011421 F 0-9:A>G-9:A>G  | VU03       | 4284517  | 0.00023  | 53.03856 | 3.638218 |
|         | 36  | 14082590 F 0-36:A>T-36:A>T | VU09       | 17208919 | 0.000236 | 33.96287 | 3.627411 |
|         | 37  | 100046154 F 0-6:C>T-6:C>T  | VU03       | 20546099 | 0.000305 | 23.40537 | 3.515384 |
|         | 38  | 14077593 F 0-60:T>A-60:T>A | VU07       | 30170236 | 0.00035  | 12.57174 | 3.456487 |
| YLD     | 39  | 35154947 F 0-39:C>T-39:C>T | VU10       | 11279555 | 0.000429 | -14.6673 | 3.367707 |
|         | 40  | 14082146 F 0-28:T>C-28:T>C | VU11       | 30563244 | 0.000474 | 20.80564 | 3.324429 |
|         | 41  | 14074811 F 0-12:G>A-12:G>A | VU04       | 39340965 | 1.06E-06 | -54.5286 | 5.972699 |

|          |    |                            |      |          |          |          |          |
|----------|----|----------------------------|------|----------|----------|----------|----------|
|          | 42 | 14055805 F 0-23:C>G-23:C>G | VU08 | 34011908 | 2.96E-06 | 56.32839 | 5.528479 |
|          | 43 | 14075093 F 0-47:G>A-47:G>A | VU04 | 36182035 | 3.69E-05 | -35.5672 | 4.432708 |
|          | 44 | 14082590 F 0-36:A>T-36:A>T | VU09 | 17208919 | 0.000211 | 45.69314 | 3.676194 |
|          | 45 | 100011421 F 0-9:A>G-9:A>G  | VU03 | 4284517  | 0.000222 | 70.96008 | 3.654445 |
|          | 46 | 100046154 F 0-6:C>T-6:C>T  | VU03 | 20546099 | 0.00031  | 31.18904 | 3.508612 |
|          | 47 | 14077593 F 0-60:T>A-60:T>A | VU07 | 30170236 | 0.000354 | 16.75555 | 3.450805 |
|          | 48 | 35154947 F 0-39:C>T-39:C>T | VU10 | 11279555 | 0.000415 | -19.6207 | 3.38198  |
|          | 49 | 14056089 F 0-34:G>A-34:G>A | VU03 | 57303579 | 0.000468 | 68.68725 | 3.330066 |
|          | 50 | 14057278 F 0-16:C>T-16:C>T | VU11 | 36490988 | 0.000468 | 34.34362 | 3.330066 |
| AbvgBmss | 51 | 14056089 F 0-34:G>A-34:G>A | VU03 | 57303579 | 0.000161 | 285.5821 | 3.794165 |
|          | 52 | 14057278 F 0-16:C>T-16:C>T | VU11 | 36490988 | 0.000161 | 142.791  | 3.794165 |
|          | 53 | 14055805 F 0-23:C>G-23:C>G | VU08 | 34011908 | 0.00039  | 141.3599 | 3.408825 |
