# Supplementary material
Source: publisher figshare collection journal article supplement (https://gsajournals.figshare.com/articles/dataset/_/25550775)
Supplement: Supplementary file 1 [file 1]

## Sheet: Sheet1
Markers	alleles	Chromosome	pos	strand	assembly	center	protLSID	assayLSID	panelLSID	QCcode	TVu-13305	TVu-13485	TVu-14190	TVu-14346	TVu-14691	TVu-1477	TVu-14788	TVu-15053	TVu-1583	TVu-2027	TVu-4557	TVu-4711	TVu-578	TVu-5828	TVu-6947	TVu-7559	TVu-8	TVu-9801	TVu-14272	TVu-15315	TVu-16722	TVu-10559	TVu-13334	TVu-13437	TVu-13463	TVu-14224	TVu-14321	TVu-14336	TVu-14393	TVu-14406	TVu-14533	TVu-14539	TVu-14970	TVu-15112	TVu-15143	TVu-15411	TVu-15653	TVu-15973	TVu-16430
14056812|F|0-18:A>C-18:A>C	A/C	VU01	65446	+	NA	NA	NA	NA	NA	NA	AA	AA	AA	AA	AA	AA	AA	AA	AA	AA	AA	AA	NN	AA	AA	AA	AA	AA	AA	AA	AA	AA	AA	AA	AA	AA	AA	AA	NN	AA	AA	AA	AA	AA	AA	AA	AC	AA	AA
14056812|F|0-31:G>T-31:G>T	G/T	VU01	65446	+	NA	NA	NA	NA	NA	NA	GG	GG	GG	GG	GG	GG	GG	GG	GG	GG	GG	GG	NN	GG	GG	GG	GG	GG	GG	GG	GG	GG	GG	GG	GG	GG	GG	GG	NN	GG	GG	GG	GG	GG	GG	GG	GG	GG	GG
14058234|F|0-25:A>C-25:A>C	A/C	VU01	164296	+	NA	NA	NA	NA	NA	NA	AA	AA	AA	AA	AA	AA	AA	CC	AA	AA	AA	AA	AA	AA	AA	AA	AA	AA	AA	AA	AA	AA	AA	AA	AA	AA	AA	AA	AA	AA	AA	AA	AA	AA	AA	AA	AA	AA	AA
14059756|F|0-5:A>G-5:A>G	A	VU01	286151	+	NA	NA	NA	NA	NA	NA	AA	AA	AA	AA	AA	AA	AA	AA	AA	AA	AA	AA	AA	AA	AA	AA	AA	AA	AA	AA	AA	AA	AA	AA	AA	AA	AA	AA	AA	AA	AA	AA	AA	AA	AA	AA	AA	AA	AA
25354624|F|0-13:C>T-13:C>T	C/T	VU01	302793	+	NA	NA	NA	NA	NA	NA	CC	CC	CC	CC	CC	CC	CC	CC	CC	TT	CC	CC	CC	TT	CC	CC	CC	CC	CC	CC	CC	CC	CC	CC	CC	CC	CC	CC	CC	CC	CC	CC	CC	CC	CC	CC	CC	CC	CC
14074189|F|0-40:G>A-40:G>A	G/A	VU01	302859	+	NA	NA	NA	NA	NA	NA	GG	GG	GG	GG	GG	GG	GG	AA	GG	GG	GG	GG	GG	GG	GG	GG	GG	GG	GG	GG	GG	GG	GG	GG	GG	GG	GG	GG	GG	GG	GG	GG	GG	GG	GG	GG	GG	GG	GG
42215344|F|0-56:C>G-56:C>G	G/C	VU01	310727	+	NA	NA	NA	NA	NA	NA	GG	GG	GG	GG	GG	GG	GG	NN	GG	GG	GG	GG	GG	GG	GG	GG	GG	GG	GG	GG	GG	GG	GG	GG	GG	GG	GG	GG	GG	GG	GG	GG	GG	GG	GG	GG	GG	GG	GG
14073594|F|0-28:C>T-28:C>T	C/T	VU01	318626	+	NA	NA	NA	NA	NA	NA	CC	CC	CC	CC	CC	CC	CC	TT	CC	CC	CC	CC	CC	CC	CC	CC	CC	CC	CC	CC	CC	CC	CC	CC	CC	CC	CC	CC	CC	CC	CC	CC	CC	CC	CC	CC	CC	CC	CC
14086028|F|0-14:C>G-14:C>G	G/C	VU01	433240	+	NA	NA	NA	NA	NA	NA	GG	GG	GG	GG	GG	GG	GG	CC	GG	GG	GG	GG	GG	GG	GG	GG	GG	GG	GG	GG	GG	GG	GG	GG	GG	GG	GG	GG	GG	GG	CC	GG	GG	CC	CC	GG	GG	GG	CC
28201804|F|0-7:A>G-7:A>G	A/G	VU01	487354	+	NA	NA	NA	NA	NA	NA	AA	AA	GG	AA	AA	NN	AA	GG	AA	AA	GG	AA	AA	AA	AA	AA	AG	GG	AA	AA	AA	AA	AA	AG	AA	AA	AA	AA	AA	AA	GG	AA	AA	GG	NN	AA	NN	AA	NN
100080144|F|0-38:A>G-38:A>G	A/G	VU01	522696	+	NA	NA	NA	NA	NA	NA	AA	AA	GG	AA	AA	AG	AA	GG	AA	AA	GG	AA	AA	AA	AA	AA	AG	AG	AA	AA	AA	AA	AA	AA	AA	AA	AA	AA	AA	AA	AG	NN	AA	AA	AG	NN	GG	AA	GG
14075003|F|0-68:T>C-68:T>C	C/T	VU01	530287	+	NA	NA	NA	NA	NA	NA	CC	CC	TT	CC	CC	TT	CC	TT	CC	CC	TT	CC	CC	CC	CC	CC	CT	TT	CC	CC	TT	CC	CC	CT	CC	CC	CC	CC	CC	CC	CT	CC	CC	TT	TT	CC	TT	CC	TT
14077823|F|0-61:G>A-61:G>A	A/G	VU01	596320	+	NA	NA	NA	NA	NA	NA	AA	AA	AA	AA	AA	GG	AA	GG	AA	AA	GG	AA	AA	AA	AA	AA	AG	GG	AA	AA	GG	NN	AA	AA	AA	AA	AA	AA	AA	AA	GG	AA	AA	GG	GG	AA	AA	AA	GG
14076240|F|0-56:A>C-56:A>C	C/A	VU01	603994	+	NA	NA	NA	NA	NA	NA	CC	CC	CC	CC	CC	AA	CC	AA	AC	CC	AA	CC	CC	CC	CC	CC	AC	AA	CC	CC	AA	CC	CC	CC	CC	CC	CC	CC	CC	CC	AA	CC	CC	AA	AA	CC	CC	CC	AA
42215534|F|0-33:G>T-33:G>T	T/G	VU01	633182	+	NA	NA	NA	NA	NA	NA	TT	TT	TT	TT	TT	TT	TT	TT	TT	TT	TT	TT	TT	TT	TT	TT	TT	TT	TT	TT	TT	TT	TT	TT	TT	TT	TT	TT	TT	TT	TT	TT	TT	TT	TT	TT	TT	TT	TT
35154690|F|0-60:C>T-60:C>T	T/C	VU01	640094	+	NA	NA	NA	NA	NA	NA	TT	TT	CT	TT	TT	CT	TT	TT	CT	TT	CT	TT	TT	TT	TT	TT	CT	CT	TT	TT	CT	NN	TT	NN	TT	NN	TT	NN	TT	TT	CT	TT	NN	CT	CT	TT	CT	TT	CT
14075885|F|0-21:A>T-21:A>T	T/A	VU01	640160	+	NA	NA	NA	NA	NA	NA	AA	AA	AA	TT	AA	AA	TT	AA	AA	TT	AA	TT	TT	TT	TT	TT	AT	AA	TT	AA	AA	TT	AA	AT	AA	AA	AA	TT	TT	TT	AA	TT	TT	AA	AA	AA	AA	AA	AA
35154690|F|0-62:T>A-62:T>A	A/T	VU01	757851	+	NA	NA	NA	NA	NA	NA	AA	AA	TT	AA	AA	TT	AA	NN	TT	AA	TT	AA	AA	AA	AA	AA	AT	TT	AA	AA	TT	AA	AA	AA	AA	AA	NN	AA	AA	AA	TT	AA	NN	TT	TT	NN	TT	AA	TT
14081928|F|0-23:A>T-23:A>T	A/T	VU01	842963	+	NA	NA	NA	NA	NA	NA	AA	AA	TT	AA	AA	AA	AA	AA	AT	AA	AA	AA	AA	AA	AA	AA	AA	AA	AA	AA	AA	AA	AA	AA	AA	AA	AA	AA	AA	AA	AA	AA	AA	AA	AA	AA	TT	AA	AA
35153711|F|0-7:T>G-7:T>G	T/G	VU01	875135	+	NA	NA	NA	NA	NA	NA	TT	TT	GG	TT	TT	TT	TT	TT	TT	TT	TT	TT	TT	TT	TT	TT	TT	TT	TT	TT	TT	TT	TT	TT	TT	TT	TT	TT	TT	TT	TT	TT	TT	TT	TT	TT	GG	TT	TT
14083800|F|0-11:C>G-11:C>G	G/C	VU01	985417	+	NA	NA	NA	NA	NA	NA	GG	GG	NN	GG	GG	CC	GG	CC	GG	GG	CC	GG	GG	GG	GG	GG	GC	GG	GG	GG	CC	GG	GG	GG	GG	GG	GG	GG	GG	GG	CC	GG	GG	CC	CC	GG	GG	GG	CC
14077451|F|0-22:G>C-22:G>C	G/C	VU01	1002982	+	NA	NA	NA	NA	NA	NA	GG	GG	GG	GG	GG	GG	GG	GG	GG	GG	GG	GG	GG	GG	GG	GG	GG	GG	GG	GG	GG	GG	GG	GG	GG	GG	GG	GG	GG	GG	GG	GG	GG	GG	GG	GG	GG	GG	GG
14075556|F|0-48:A>C-48:A>C	C/A	VU01	1065646	+	NA	NA	NA	NA	NA	NA	CC	CC	CC	CC	CC	CC	CC	CC	CC	CC	CC	CC	CC	CC	CC	CC	CC	CC	CC	CC	CC	CC	CC	CC	CC	CC	CC	CC	CC	CC	AA	CC	CC	AA	AA	CC	CC	CC	AA
14082364|F|0-7:G>A-7:G>A	A/G	VU01	1072717	+	NA	NA	NA	NA	NA	NA	NN	AA	AA	AA	AA	AA	AA	AA	AA	AA	AA	AA	AA	AA	AA	AA	AA	AA	AA	AA	NN	AA	AA	AA	AA	AA	AA	NN	AA	AA	GG	AA	NN	GG	NN	NN	AA	AA	GG
14075978|F|0-63:G>A-63:G>A	G/A	VU01	1115349	+	NA	NA	NA	NA	NA	NA	GG	GG	AA	GG	GG	GG	GG	GG	AA	GG	GG	GG	GG	GG	GG	GG	GG	GG	GG	GG	GG	GG	GG	GG	GG	GG	GG	GG	GG	GG	GG	GG	GG	AA	GG	GG	AA	GG	GG
14077544|F|0-15:C>G-15:C>G	C/G	VU01	1124843	+	NA	NA	NA	NA	NA	NA	CC	CC	GG	CC	CC	CC	CC	CC	GC	CC	CC	CC	NN	CC	CC	CC	CC	CC	CC	CC	CC	CC	CC	CC	CC	CC	CC	CC	NN	CC	CC	CC	CC	CC	CC	CC	GG	CC	CC
14077544|F|0-63:T>C-63:T>C	T/C	VU01	1124843	+	NA	NA	NA	NA	NA	NA	TT	TT	NN	TT	TT	TT	TT	TT	TT	TT	TT	TT	CC	TT	TT	TT	CT	TT	TT	TT	TT	CC	TT	CT	TT	TT	TT	TT	CC	TT	TT	TT	TT	TT	TT	TT	NN	TT	TT
14073323|F|0-21:G>T-21:G>T	G/T	VU01	1173472	+	NA	NA	NA	NA	NA	NA	GG	GG	TT	GG	GG	GG	GG	GG	GT	GG	GG	GG	GG	GG	GG	GG	GG	GG	GG	GG	GG	GG	GG	GG	GG	GG	GG	GG	GG	GG	GG	GG	GG	GG	GG	GG	NN	GG	GG
14078824|F|0-14:G>T-14:G>T	T/G	VU01	1267584	+	NA	NA	NA	NA	NA	NA	TT	TT	TT	TT	TT	TT	TT	TT	GG	TT	TT	TT	GG	TT	GG	TT	GT	TT	TT	TT	TT	GG	TT	GT	TT	TT	TT	TT	TT	TT	TT	TT	TT	TT	TT	NN	TT	TT	TT
14078204|F|0-43:A>C-43:A>C	C/A	VU01	1292063	+	NA	NA	NA	NA	NA	NA	CC	CC	CC	CC	CC	CC	CC	CC	AA	CC	CC	CC	CC	CC	CC	CC	CC	CC	CC	CC	CC	NN	CC	CC	CC	CC	CC	CC	CC	CC	CC	CC	CC	CC	CC	NN	CC	CC	CC
14086132|F|0-25:A>T-25:A>T	A/T	VU01	1299287	+	NA	NA	NA	NA	NA	NA	AA	AA	AA	AA	AA	AA	AA	AA	AA	AA	AA	AA	TT	AA	TT	AA	AT	AA	AA	AA	AA	TT	AA	AT	AA	AA	AA	AA	AA	AT	AA	AA	AA	AA	AA	NN	AA	AA	AA
14086132|F|0-55:G>A-55:G>A	G/A	VU01	1299287	+	NA	NA	NA	NA	NA	NA	GG	GG	GG	GG	GG	GG	GG	GG	AG	GG	GG	GG	NN	GG	NN	GG	GG	GG	GG	GG	GG	GG	GG	GG	GG	GG	GG	GG	GG	GG	GG	GG	GG	GG	GG	AA	GG	GG	GG
25363085|F|0-19:T>G-19:T>G	G/T	VU01	1379733	+	NA	NA	NA	NA	NA	NA	GG	GG	GG	GG	GG	GG	TT	GG	TT	GG	GG	GG	TT	GG	TT	GG	GT	GG	GG	GG	GG	TT	GG	GT	GG	GG	GG	GG	GG	TT	GG	TT	GG	GG	GG	TT	GG	GG	GG
14073659|F|0-28:T>G-28:T>G	T/G	VU01	1398823	+	NA	NA	NA	NA	NA	NA	TT	TT	TT	TT	TT	TT	TT	TT	TT	TT	TT	TT	NN	TT	TT	TT	TT	TT	TT	TT	TT	NN	TT	NN	TT	TT	TT	TT	TT	TT	GG	TT	TT	TT	GG	TT	TT	TT	GG
14073659|F|0-5:A>G-5:A>G	A/G	VU01	1398823	+	NA	NA	NA	NA	NA	NA	AA	AA	AA	AA	AA	AA	AA	AA	AA	AA	AA	AA	GG	AA	AA	AA	AG	AA	AA	AA	AA	GG	AA	GG	AA	AA	AA	AA	AA	AA	NN	AA	AA	AA	NN	AA	AA	AA	NN
42215965|F|0-10:T>C-10:T>C	C/T	VU01	1437910	+	NA	NA	NA	NA	NA	NA	CC	CC	CC	CC	CC	CC	CC	CC	CC	CC	CC	CC	TT	CC	CC	CC	CT	CC	CC	CC	CC	NN	CC	NN	CC	CC	CC	CC	CC	NN	CC	CC	CT	NN	CC	NN	CC	NN	CC
14057745|F|0-34:A>T-34:A>T	A/T	VU01	1583820	+	NA	NA	NA	NA	NA	NA	AA	AA	AA	AA	AA	AA	AA	AA	AA	AA	AA	AA	AA	AA	AA	AA	AA	AT	AA	AA	AA	AA	AA	AA	AA	AA	AA	AA	AA	AA	AA	AA	AA	AA	AA	TT	AA	AA	AA
14085480|F|0-6:T>C-6:T>C	C/T	VU01	1803238	+	NA	NA	NA	NA	NA	NA	NN	CC	TT	CC	CC	TT	CC	CC	CC	CC	CC	CC	CC	CC	CC	CC	CT	CC	CC	CC	CC	NN	CC	CC	NN	CC	CC	CC	CC	CC	TT	CC	CC	TT	TT	TT	TT	CC	TT
14077316|F|0-21:T>A-21:T>A	T/A	VU01	1889573	+	NA	NA	NA	NA	NA	NA	TT	TT	TT	TT	TT	AA	TT	TT	TT	TT	TT	TT	TT	TT	TT	TT	AT	TT	TT	TT	TT	AT	TT	TT	TT	TT	TT	TT	TT	TT	AA	TT	TT	AA	AA	TT	TT	TT	AA
14084743|F|0-67:C>G-67:C>G	G/C	VU01	1892745	+	NA	NA	NA	NA	NA	NA	CC	GG	CC	GC	GG	CC	GC	GG	GG	GG	GG	GC	GG	GG	GG	GC	GC	GG	GG	CC	GG	GC	GG	GG	GG	GG	GG	GG	GG	GG	CC	GG	GC	CC	CC	CC	CC	GG	CC
14073853|F|0-57:T>C-57:T>C	C	VU01	1972603	+	NA	NA	NA	NA	NA	NA	CC	CC	CC	CC	CC	NN	CC	CC	CC	CC	CC	CC	CC	CC	CC	CC	CC	CC	CC	CC	CC	CC	CC	CC	CC	CC	CC	CC	CC	CC	NN	CC	CC	NN	CC	NN	CC	CC	CC
25365820|F|0-15:T>A-15:T>A	T	VU01	2218327	+	NA	NA	NA	NA	NA	NA	TT	TT	TT	TT	TT	TT	TT	TT	TT	TT	TT	TT	TT	TT	TT	TT	TT	TT	TT	TT	TT	TT	TT	TT	TT	TT	TT	TT	TT	TT	TT	TT	TT	TT	TT	TT	TT	TT	TT
14081930|F|0-40:A>C-40:A>C	C/A	VU01	2347474	+	NA	NA	NA	NA	NA	NA	CC	CC	CC	CC	CC	CC	CC	CC	CC	CC	AA	CC	CC	CC	CC	CC	CC	CC	CC	CC	CC	CC	CC	CC	CC	CC	CC	CC	CC	CC	AA	CC	CC	CC	CC	NN	CC	CC	CC
14076215|F|0-45:G>A-45:G>A	A/G	VU01	2524875	+	NA	NA	NA	NA	NA	NA	AA	AA	AA	AA	AA	AA	AA	AA	AA	AA	AA	AA	AA	AA	AA	AA	AA	AA	AA	AA	AA	AA	AA	AA	AA	AA	AA	AA	AA	AA	GG	AA	AA	AA	AA	NN	AA	AA	AA
14085182|F|0-21:A>G-21:A>G	A/G	VU01	2528635	+	NA	NA	NA	NA	NA	NA	AA	AA	GG	AA	AA	AA	AA	AA	AA	AA	AA	AA	AA	AA	AA	AA	AA	AA	AA	AA	GG	AA	AA	AA	AA	AA	AA	AA	AA	AA	GG	AA	AA	AA	AA	NN	GG	AA	AA
14086453|F|0-29:C>T-29:C>T	T/C	VU01	2541615	+	NA	NA	NA	NA	NA	NA	TT	TT	CC	TT	TT	TT	TT	TT	TT	TT	TT	TT	TT	TT	TT	TT	TT	TT	TT	TT	CC	TT	TT	TT	TT	TT	TT	TT	TT	TT	CC	TT	TT	TT	TT	TT	CC	TT	TT
14087491|F|0-26:T>C-26:T>C	T/C	VU01	2571828	+	NA	NA	NA	NA	NA	NA	TT	TT	NN	TT	TT	TT	TT	TT	TT	TT	NN	TT	TT	TT	TT	TT	TT	TT	TT	TT	TT	NN	TT	TT	TT	NN	TT	TT	TT	TT	TT	TT	TT	NN	TT	TT	TT	TT	TT
14080016|F|0-6:T>A-6:T>A	A/T	VU01	2634640	+	NA	NA	NA	NA	NA	NA	AA	AA	TT	AA	AA	TT	AA	AA	AA	AA	AA	AA	AA	AA	AA	AA	AT	AA	AA	AA	TT	AT	AA	AA	AA	AA	AA	AA	AA	AA	TT	AA	AA	AA	AA	NN	AT	AA	AA
35154063|F|0-26:A>G-26:A>G	G/A	VU01	2639436	+	NA	NA	NA	NA	NA	NA	GG	GG	AA	GG	GG	AA	GG	GG	GG	NN	GG	GG	GG	NN	NN	GG	AG	GG	GG	GG	AA	GG	GG	GG	GG	GG	GG	GG	NN	GG	NN	GG	GG	GG	NN	GG	AA	GG	GG
14082078|F|0-54:G>A-54:G>A	G/A	VU01	2706557	+	NA	NA	NA	NA	NA	NA	GG	GG	AA	GG	GG	AA	GG	GG	GG	GG	GG	GG	GG	GG	GG	GG	AG	GG	GG	GG	AA	GG	GG	GG	GG	GG	GG	GG	GG	GG	AA	GG	GG	GG	GG	GG	AA	GG	GG
25356219|F|0-50:G>A-50:G>A	G	VU01	2708862	+	NA	NA	NA	NA	NA	NA	GG	GG	GG	GG	GG	GG	GG	GG	GG	GG	GG	GG	GG	GG	GG	GG	GG	GG	GG	GG	GG	GG	GG	GG	GG	GG	GG	GG	GG	GG	GG	GG	GG	GG	GG	GG	GG	GG	GG
14073582|F|0-41:G>A-41:G>A	G/A	VU01	2722316	+	NA	NA	NA	NA	NA	NA	GG	GG	AA	GG	GG	AA	GG	GG	GG	GG	GG	GG	GG	GG	GG	GG	AG	GG	GG	GG	AA	GG	GG	GG	GG	GG	GG	GG	GG	GG	AA	GG	GG	GG	GG	AA	AA	GG	GG
14073352|F|0-11:G>A-11:G>A	A/G	VU01	2745476	+	NA	NA	NA	NA	NA	NA	AA	AA	GG	AA	AA	GG	AA	AA	AA	AA	AA	AA	AA	AA	AA	AA	AG	AA	AA	AA	GG	AG	AA	AA	AA	AA	AA	AA	AA	AA	GG	AA	AA	NN	AA	NN	GG	AA	AA
35153458|F|0-45:T>C-45:T>C	T/C	VU01	2789717	+	NA	NA	NA	NA	NA	NA	TT	TT	CC	TT	TT	CC	TT	NN	TT	TT	TT	TT	TT	TT	TT	TT	CC	TT	TT	TT	CC	TT	TT	NN	TT	TT	TT	TT	TT	TT	CC	TT	TT	NN	TT	TT	CC	TT	TT
35154219|F|0-5:T>C-5:T>C	T/C	VU01	2789783	+	NA	NA	NA	NA	NA	NA	TT	TT	NN	TT	TT	CC	TT	TT	TT	TT	TT	TT	TT	TT	TT	TT	CT	TT	TT	TT	CC	TT	TT	TT	TT	TT	NN	TT	TT	TT	CC	TT	TT	TT	TT	TT	CC	TT	TT
100010491|F|0-10:T>C-10:T>C	T	VU01	3016908	+	NA	NA	NA	NA	NA	NA	TT	TT	TT	TT	TT	TT	TT	TT	TT	TT	TT	TT	TT	TT	TT	TT	TT	TT	TT	TT	TT	TT	TT	TT	TT	TT	TT	TT	TT	TT	TT	TT	TT	TT	TT	TT	TT	TT	TT
14085490|F|0-45:T>C-45:T>C	C/T	VU01	3020996	+	NA	NA	NA	NA	NA	NA	CC	CC	TT	CC	CC	TT	CC	CC	CC	CC	CC	CC	CC	CC	CC	CC	CT	CC	CC	CC	TT	CC	CC	CC	CC	CC	CC	CC	CC	CC	TT	CC	CT	CC	CT	CC	TT	CC	CC
14082900|F|0-63:A>G-63:A>G	G/A	VU01	3125759	+	NA	NA	NA	NA	NA	NA	GG	AA	AA	GG	AA	NN	GG	AA	AA	GG	AA	GG	GG	AA	AA	GG	GG	AA	AG	AG	AA	GG	AA	AA	GG	GG	AA	GG	GG	GG	NN	GG	GG	AA	AA	GG	AA	GG	AA
35153763|F|0-11:G>A-11:G>A	G/A	VU01	3131085	+	NA	NA	NA	NA	NA	NA	GG	AA	AA	GG	AA	GG	GG	AA	AA	GG	AA	GG	GG	AA	AA	GG	GG	AA	GG	GG	AA	GG	AA	NN	GG	GG	AA	GG	GG	GG	GG	GG	GG	AA	NN	NN	AA	GG	AA
14079785|F|0-46:T>G-46:T>G	T/G	VU01	3159683	+	NA	NA	NA	NA	NA	NA	TT	TT	TT	TT	TT	GG	TT	TT	TT	TT	TT	TT	TT	TT	TT	TT	GT	TT	TT	TT	TT	TT	TT	TT	TT	TT	TT	TT	TT	TT	GG	TT	TT	TT	TT	TT	TT	TT	TT
35152786|F|0-13:A>G-13:A>G	G/A	VU01	3201481	+	NA	NA	NA	NA	NA	NA	GG	GG	GG	GG	GG	AA	GG	GG	NN	GG	GG	GG	GG	GG	GG	GG	AA	GG	GG	GG	GG	NN	GG	GG	GG	GG	NN	GG	GG	NN	AA	GG	GG	NN	GG	NN	NN	NN	GG
14076980|F|0-68:C>T-68:C>T	T/C	VU01	3319882	+	NA	NA	NA	NA	NA	NA	CC	TT	TT	TT	CC	CC	TT	TT	CT	TT	TT	TT	CC	TT	TT	CC	CC	TT	TT	CC	TT	CT	TT	TT	TT	CC	CC	TT	TT	TT	CC	TT	TT	TT	TT	CC	TT	CC	TT
35154716|F|0-20:G>C-20:G>C	G/C	VU01	3326949	+	NA	NA	NA	NA	NA	NA	GG	GG	CC	GG	GG	CC	GG	GG	GG	GG	GG	GG	GG	GG	GG	NN	GG	GG	GG	NN	GG	GG	NN	NN	GG	GG	GG	GG	GG	NN	CC	NN	GG	GG	NN	NN	CC	NN	GG
14074024|F|0-58:T>C-58:T>C	T/C	VU01	3351330	+	NA	NA	NA	NA	NA	NA	TT	TT	CC	TT	TT	CC	TT	TT	TT	TT	TT	TT	TT	TT	TT	TT	CC	TT	TT	NN	TT	TT	TT	TT	TT	CC	TT	TT	TT	TT	CC	TT	TT	TT	TT	NN	CC	CT	TT
14060170|F|0-34:G>A-34:G>A	G/A	VU01	3353711	+	NA	NA	NA	NA	NA	NA	GG	GG	NN	GG	GG	NN	GG	GG	GG	GG	GG	GG	GG	GG	GG	GG	GG	GG	GG	AA	GG	GG	GG	GG	GG	GG	GG	GG	GG	GG	NN	GG	GG	GG	GG	AA	NN	GG	AG
14078376|F|0-34:C>T-34:C>T	T/C	VU01	3401497	+	NA	NA	NA	NA	NA	NA	CC	TT	NN	TT	TT	CC	TT	NN	TT	TT	TT	TT	TT	NN	TT	TT	CC	CC	TT	NN	TT	TT	TT	TT	NN	TT	TT	NN	TT	NN	TT	NN	TT	TT	TT	NN	TT	TT	TT
25354098|F|0-34:A>C-34:A>C	A/C	VU01	3405298	+	NA	NA	NA	NA	NA	NA	CC	AA	AA	AA	AA	CC	AA	AA	AA	AA	AA	AA	AA	AA	AA	AA	AC	CC	AA	AA	AA	AA	AA	AA	AA	AA	AA	AA	AA	AA	AA	AA	AA	AA	AA	AA	AA	AA	AA
14075300|F|0-8:A>C-8:A>C	A/C	VU01	3464624	+	NA	NA	NA	NA	NA	NA	AA	AA	AA	AA	AA	AA	AA	CC	AC	AA	AA	AA	AA	AA	AA	AA	AC	AA	AA	AA	AA	AA	AA	AA	CC	AA	AA	AA	AA	AA	AA	AA	AA	AA	AA	AA	AA	AA	AA
14074572|F|0-24:G>T-24:G>T	T/G	VU01	3465302	+	NA	NA	NA	NA	NA	NA	TT	TT	TT	TT	TT	TT	TT	TT	TT	TT	TT	TT	TT	TT	TT	TT	TT	TT	TT	GG	TT	TT	TT	TT	TT	TT	TT	TT	TT	TT	TT	TT	TT	TT	TT	NN	TT	TT	TT
14082450|F|0-18:C>T-18:C>T	C/T	VU01	3500077	+	NA	NA	NA	NA	NA	NA	CC	CC	CC	CC	CC	CC	CC	TT	CC	CC	CC	CC	CC	CC	CC	CC	CC	CC	CC	NN	CC	CC	CC	CC	TT	CC	CC	CC	CC	CC	CC	CC	CC	CC	CC	NN	CC	CC	CC
14084858|F|0-41:T>C-41:T>C	T/C	VU01	3500143	+	NA	NA	NA	NA	NA	NA	TT	TT	TT	TT	TT	TT	TT	CC	TT	TT	TT	TT	TT	TT	TT	TT	CT	TT	TT	TT	TT	TT	TT	TT	CC	TT	TT	TT	TT	TT	TT	TT	TT	TT	TT	TT	TT	TT	TT
14082777|F|0-23:C>A-23:C>A	C/A	VU01	3672077	+	NA	NA	NA	NA	NA	NA	CC	CC	NN	CC	CC	CC	CC	NN	CC	CC	NN	CC	CC	CC	CC	CC	CC	NN	CC	CC	CC	CC	CC	CC	NN	CC	CC	CC	CC	CC	NN	CC	CC	CC	CC	CC	NN	CC	CC
14082777|F|0-34:G>T-34:G>T	G/T	VU01	3672077	+	NA	NA	NA	NA	NA	NA	GG	GG	TT	GG	GG	GG	GG	TT	GG	GG	TT	GG	GG	GG	GG	GG	GG	TT	GG	GG	GG	GG	GG	GG	TT	GG	GG	GG	GG	GG	TT	GG	GG	GG	GG	GG	TT	GG	GG
14073570|F|0-40:A>G-40:A>G	G/A	VU01	3696096	+	NA	NA	NA	NA	NA	NA	GG	GG	AA	GG	GG	GG	GG	AA	GG	GG	AA	GG	GG	GG	GG	GG	GG	AA	GG	AG	GG	GG	GG	GG	AA	GG	GG	GG	GG	GG	AA	GG	GG	GG	GG	AA	AA	GG	GG
14075730|F|0-51:A>T-51:A>T	A/T	VU01	3715527	+	NA	NA	NA	NA	NA	NA	AA	AA	TT	AA	AA	AA	AA	TT	AA	AA	TT	AA	AA	AA	AA	AA	AA	TT	AA	NN	AA	AA	AA	AA	TT	AA	AA	AA	AA	AA	TT	AA	AA	AA	AA	NN	TT	AA	AA
14082395|F|0-44:A>T-44:A>T	A/T	VU01	3769810	+	NA	NA	NA	NA	NA	NA	AA	AA	TT	AA	AA	AA	AA	TT	AA	AA	TT	AA	AA	AA	AA	AA	AA	TT	AA	AA	AA	AA	AA	AA	TT	AA	AA	AA	AA	AA	TT	AA	AA	AA	AA	AA	TT	AA	AA
14077588|F|0-37:G>C-37:G>C	C/G	VU01	3794679	+	NA	NA	NA	NA	NA	NA	CC	CC	GG	CC	CC	CC	CC	GG	CC	CC	GG	CC	CC	CC	CC	CC	CC	GG	CC	NN	CC	CC	CC	CC	GG	CC	CC	CC	CC	CC	GG	CC	GC	CC	CC	NN	GC	CC	CC
14085276|F|0-26:G>T-26:G>T	T/G	VU01	3800665	+	NA	NA	NA	NA	NA	NA	TT	TT	GG	TT	TT	TT	TT	GG	TT	TT	GG	TT	TT	TT	TT	TT	TT	GG	TT	GG	TT	TT	TT	TT	GG	TT	TT	TT	TT	TT	GG	TT	TT	TT	TT	GG	GG	TT	TT
14082826|F|0-61:G>T-61:G>T	G/T	VU01	3856051	+	NA	NA	NA	NA	NA	NA	GG	GG	TT	GG	GG	GG	GG	TT	GG	GG	TT	GG	GG	GG	GG	GG	GG	TT	GG	GG	GG	GG	GG	GG	TT	GG	GG	GG	GG	GG	TT	GG	GG	GG	GG	GG	TT	GG	GG
14077587|F|0-36:T>A-36:T>A	A/T	VU01	3856117	+	NA	NA	NA	NA	NA	NA	AA	AA	TT	AA	AA	AA	AA	TT	AA	AA	TT	AA	AA	AA	AA	AA	AA	TT	AA	TT	AA	AT	AA	AA	TT	AA	AA	AA	AA	AA	TT	AA	AA	AA	AA	TT	TT	AA	AA
14085277|F|0-18:C>A-18:C>A	C/A	VU01	3856663	+	NA	NA	NA	NA	NA	NA	CC	CC	CC	CC	CC	CC	CC	CC	CC	CC	CC	CC	CC	CC	CC	CC	CC	CC	CC	NN	CC	CC	CC	CC	CC	CC	CC	CC	CC	CC	CC	CC	CC	CC	CC	NN	CC	CC	CC
14076543|F|0-45:T>A-45:T>A	T	VU01	3926479	+	NA	NA	NA	NA	NA	NA	TT	TT	NN	TT	TT	TT	TT	NN	TT	TT	NN	TT	TT	TT	TT	TT	TT	NN	TT	NN	TT	TT	TT	TT	NN	TT	TT	TT	TT	TT	NN	TT	TT	TT	TT	NN	NN	NN	TT
14076543|F|0-60:C>A-60:C>A	C/A	VU01	3926479	+	NA	NA	NA	NA	NA	NA	CC	CC	AA	CC	CC	CC	CC	AA	CC	CC	AA	CC	CC	CC	CC	CC	CC	AA	CC	AA	CC	CC	CC	CC	AA	CC	CC	CC	CC	CC	AA	CC	CC	CC	CC	AA	AA	NN	CC
14073390|F|0-49:C>T-49:C>T	T/C	VU01	3940639	+	NA	NA	NA	NA	NA	NA	TT	TT	CC	TT	TT	TT	TT	CC	TT	TT	CC	TT	TT	TT	TT	TT	TT	CC	TT	TT	TT	TT	TT	TT	CC	TT	TT	TT	TT	TT	CC	TT	TT	TT	TT	TT	CC	TT	TT
25365689|F|0-15:T>G-15:T>G	T/G	VU01	4074386	+	NA	NA	NA	NA	NA	NA	TT	TT	TT	TT	TT	TT	TT	TT	TT	TT	TT	TT	TT	TT	TT	TT	TT	TT	TT	TT	TT	TT	TT	TT	TT	TT	TT	TT	TT	TT	TT	TT	TT	NN	TT	TT	TT	TT	TT
25363012|F|0-24:T>G-24:T>G	T/G	VU01	4358006	+	NA	NA	NA	NA	NA	NA	TT	TT	GT	TT	TT	TT	TT	TT	TT	TT	GT	TT	TT	TT	TT	TT	TT	GT	TT	TT	TT	GT	TT	TT	TT	TT	TT	TT	TT	TT	GT	TT	TT	TT	TT	TT	GT	TT	TT
14076449|F|0-21:T>C-21:T>C	C/T	VU01	4363472	+	NA	NA	NA	NA	NA	NA	NN	CC	TT	CC	CC	CC	CC	CC	CC	CC	TT	CC	CC	CC	CC	CC	CC	TT	CC	NN	CC	CC	CC	CC	CC	CC	CC	CC	CC	CC	TT	CC	CC	CC	CC	NN	TT	CC	CC
14085152|F|0-15:C>T-15:C>T	T/C	VU01	4414818	+	NA	NA	NA	NA	NA	NA	NN	TT	CC	TT	TT	NN	TT	TT	CT	TT	CC	TT	TT	TT	TT	TT	TT	NN	TT	NN	TT	TT	TT	TT	TT	TT	TT	TT	TT	TT	CC	TT	TT	TT	TT	NN	CC	TT	TT
14085154|F|0-43:A>T-43:A>T	T/A	VU01	4414818	+	NA	NA	NA	NA	NA	NA	AA	TT	AA	TT	TT	NN	TT	TT	AT	TT	AA	TT	TT	TT	TT	TT	TT	AA	TT	AA	TT	AT	TT	TT	TT	TT	TT	TT	TT	TT	AA	TT	TT	TT	TT	AA	AA	TT	TT
14054987|F|0-39:G>A-39:G>A	G/A	VU01	4569718	+	NA	NA	NA	NA	NA	NA	GG	GG	GG	GG	GG	GG	GG	GG	GG	GG	GG	GG	GG	GG	GG	GG	GG	GG	GG	GG	GG	GG	GG	GG	GG	GG	GG	GG	GG	GG	GG	GG	GG	GG	GG	GG	GG	GG	GG
35153524|F|0-67:G>A-67:G>A	G/A	VU01	4589468	+	NA	NA	NA	NA	NA	NA	GG	GG	GG	GG	GG	GG	GG	GG	GG	GG	GG	GG	GG	GG	GG	GG	GG	GG	GG	GG	GG	GG	GG	GG	GG	GG	NN	GG	GG	GG	GG	GG	GG	NN	GG	NN	GG	GG	GG
25352775|F|0-49:C>A-49:C>A	C	VU01	4674345	+	NA	NA	NA	NA	NA	NA	CC	CC	CC	CC	CC	CC	CC	CC	CC	CC	CC	CC	CC	CC	CC	CC	CC	CC	CC	CC	CC	CC	CC	CC	CC	CC	CC	CC	CC	CC	CC	CC	CC	CC	CC	CC	CC	CC	CC
35152639|F|0-38:T>A-38:T>A	A/T	VU01	4718399	+	NA	NA	NA	NA	NA	NA	AA	AA	AA	AA	AA	AA	AA	AA	AA	AA	AA	AA	AA	AA	AA	AA	AA	AA	AA	AA	AA	AA	AA	AA	AA	AA	AA	AA	AA	AA	AA	AA	AA	AA	AA	AA	AA	AA	AA
14075928|F|0-66:A>T-66:A>T	T/A	VU01	4841848	+	NA	NA	NA	NA	NA	NA	TT	TT	AA	TT	TT	TT	AT	TT	TT	TT	TT	TT	TT	TT	TT	TT	TT	TT	TT	TT	TT	AT	TT	TT	TT	TT	TT	TT	TT	TT	AA	TT	TT	TT	TT	TT	AA	TT	TT
25352813|F|0-7:G>T-7:G>T	G/T	VU01	4956559	+	NA	NA	NA	NA	NA	NA	GG	GG	GG	GG	GG	GG	GG	GG	GG	GG	GG	GG	GG	GG	TT	GG	GG	GG	GG	GG	GG	GG	GG	GG	GG	GG	GG	GG	GG	GG	GG	GG	GG	GG	GG	NN	GG	GG	GG
28203146|F|0-67:T>A-67:T>A	T/A	VU01	5291390	+	NA	NA	NA	NA	NA	NA	TT	TT	TT	TT	TT	TT	TT	TT	TT	TT	TT	TT	TT	TT	TT	TT	TT	TT	TT	TT	TT	TT	TT	TT	TT	TT	TT	TT	TT	TT	TT	TT	TT	TT	TT	TT	TT	TT	TT
14057695|F|0-67:T>A-67:T>A	T	VU01	5728793	+	NA	NA	NA	NA	NA	NA	TT	TT	TT	TT	TT	TT	TT	TT	TT	TT	TT	TT	TT	TT	TT	TT	TT	TT	TT	TT	TT	TT	TT	TT	TT	TT	TT	TT	TT	TT	TT	TT	TT	TT	TT	TT	TT	TT	TT
28201870|F|0-58:G>T-58:G>T	G/T	VU01	5809281	+	NA	NA	NA	NA	NA	NA	GG	GG	GG	GG	GG	GG	GG	GG	GG	GG	GG	GG	GG	GG	GG	GG	GG	GG	GG	GG	GG	GG	GG	GT	TT	GG	GG	GG	GG	GG	GG	GG	GG	GG	GG	NN	GG	GG	GG
25354577|F|0-61:A>G-61:A>G	A/G	VU01	5840555	+	NA	NA	NA	NA	NA	NA	AA	AA	AA	AA	AA	AA	AA	AA	AA	AA	AA	AA	AA	AA	AA	AA	AA	AA	AA	AA	AA	AA	AA	AA	AA	AA	AA	AA	AA	AA	AA	AA	AA	AA	AA	NN	AA	AA	AA
14054988|F|0-7:G>C-7:G>C	G	VU01	5869941	+	NA	NA	NA	NA	NA	NA	GG	GG	GG	GG	GG	GG	GG	GG	GG	GG	GG	GG	GG	GG	GG	GG	GG	GG	GG	GG	GG	GG	GG	GG	GG	GG	GG	GG	GG	GG	GG	GG	GG	GG	GG	NN	GG	GG	GG
28201882|F|0-39:T>C-39:T>C	T/C	VU01	5991531	+	NA	NA	NA	NA	NA	NA	TT	TT	TT	TT	TT	TT	TT	TT	TT	TT	TT	TT	TT	TT	CC	TT	TT	TT	TT	TT	TT	TT	TT	TT	TT	TT	TT	TT	TT	TT	TT	TT	TT	TT	TT	NN	TT	TT	TT
14057267|F|0-28:G>A-28:G>A	G/A	VU01	6001180	+	NA	NA	NA	NA	NA	NA	GG	GG	GG	AA	GG	GG	AA	GG	GG	GG	GG	GG	GG	GG	GG	GG	GG	GG	GG	GG	AG	GG	GG	GG	GG	GG	GG	GG	GG	GG	GG	GG	GG	GG	GG	GG	GG	GG	GG
28203349|F|0-57:C>T-57:C>T	C/T	VU01	6051377	+	NA	NA	NA	NA	NA	NA	CC	CC	CC	CC	CC	CC	CC	CC	CC	CC	CC	CC	CC	CT	CC	NN	CC	CC	CC	CC	CC	CC	CC	CC	NN	CC	CC	CC	CC	CC	NN	CC	NN	CC	CC	NN	CC	NN	CC
28203065|F|0-41:C>T-41:C>T	T	VU01	6058746	+	NA	NA	NA	NA	NA	NA	TT	TT	TT	TT	TT	TT	TT	TT	TT	TT	TT	TT	TT	TT	TT	TT	TT	TT	TT	TT	TT	TT	TT	TT	TT	TT	TT	TT	TT	TT	TT	TT	TT	TT	TT	NN	TT	TT	TT
14061739|F|0-35:A>G-35:A>G	A	VU01	6245091	+	NA	NA	NA	NA	NA	NA	AA	AA	AA	AA	AA	AA	AA	AA	AA	AA	AA	AA	AA	AA	AA	AA	AA	AA	AA	AA	AA	AA	AA	AA	AA	AA	AA	AA	AA	AA	AA	AA	AA	AA	AA	AA	AA	AA	AA
100012287|F|0-43:G>C-43:G>C	G/C	VU01	6264542	+	NA	NA	NA	NA	NA	NA	GG	GG	GG	NN	GG	GG	GG	GG	GG	GG	GG	GG	GG	GG	NN	GG	GG	GG	GG	GG	GG	GG	GG	GG	GG	GG	GG	GG	GG	GG	GG	CC	GG	GG	GG	NN	GG	GG	GG
25357688|F|0-16:A>G-16:A>G	A	VU01	6276666	+	NA	NA	NA	NA	NA	NA	AA	AA	AA	AA	AA	AA	AA	AA	AA	AA	AA	AA	AA	AA	AA	AA	AA	AA	AA	AA	AA	AA	AA	AA	AA	AA	AA	AA	AA	AA	AA	AA	AA	AA	AA	NN	AA	AA	AA
28202891|F|0-41:T>C-41:T>C	T	VU01	6689992	+	NA	NA	NA	NA	NA	NA	TT	TT	TT	TT	TT	TT	TT	TT	TT	TT	TT	TT	TT	TT	TT	TT	TT	TT	TT	TT	TT	TT	NN	TT	NN	TT	TT	TT	NN	TT	TT	NN	TT	TT	TT	NN	TT	TT	NN
14082075|F|0-13:A>G-13:A>G	A/G	VU01	6989701	+	NA	NA	NA	NA	NA	NA	AA	AA	AA	AA	AA	AA	AA	AA	AA	AA	AA	AA	NN	AA	AA	NN	AA	AA	AA	AA	AA	AA	AA	AA	NN	NN	AA	AA	AA	AA	AA	AA	AA	AA	AA	GG	AA	AA	AA
14059667|F|0-9:C>A-9:C>A	C/A	VU01	6989767	+	NA	NA	NA	NA	NA	NA	CC	CC	CC	CC	CC	CC	CC	CC	CC	CC	CC	CC	CC	CC	CC	NN	CC	CC	CC	CC	NN	CC	CC	CC	CC	NN	CC	CC	CC	CC	CC	CC	CC	CC	CC	CC	CC	CC	CC
25365986|F|0-51:A>T-51:A>T	T/A	VU01	7037318	+	NA	NA	NA	NA	NA	NA	TT	TT	TT	TT	TT	TT	TT	TT	TT	TT	TT	TT	TT	TT	TT	TT	TT	TT	TT	TT	TT	TT	TT	TT	TT	TT	TT	TT	TT	TT	TT	TT	TT	TT	TT	AA	TT	TT	TT
14077465|F|0-33:G>C-33:G>C	C/G	VU01	7111534	+	NA	NA	NA	NA	NA	NA	GG	CC	GG	CC	GG	CC	CC	GG	CC	CC	GG	CC	CC	CC	CC	CC	GG	CC	CC	CC	CC	CC	GG	GC	GG	GG	GG	CC	CC	CC	GG	CC	CC	CC	GG	CC	GC	GG	GG
14057916|F|0-51:C>G-51:C>G	C/G	VU01	7200792	+	NA	NA	NA	NA	NA	NA	CC	CC	CC	CC	CC	CC	CC	CC	CC	CC	CC	CC	CC	CC	CC	CC	CC	CC	CC	CC	CC	CC	CC	CC	CC	CC	CC	CC	CC	CC	CC	CC	CC	CC	CC	GG	CC	CC	CC
14055621|F|0-35:A>C-35:A>C	A	VU01	7381627	+	NA	NA	NA	NA	NA	NA	AA	AA	NN	AA	AA	AA	AA	NN	AA	AA	AA	AA	AA	AA	AA	AA	AA	NN	AA	AA	AA	AA	AA	AA	AA	AA	NN	AA	AA	AA	AA	AA	AA	AA	AA	AA	NN	AA	AA
25366658|F|0-16:A>T-16:A>T	A/T	VU01	7555598	+	NA	NA	NA	NA	NA	NA	AA	AA	AA	AA	AA	AA	AA	AA	AA	AA	AA	AA	AA	AA	AA	AA	AA	AA	AA	AA	AA	AA	AA	AA	AA	AA	AA	AA	AA	AA	AA	AA	AA	AA	AA	AA	AA	AA	AA
25366658|F|0-27:A>G-27:A>G	G	VU01	7555598	+	NA	NA	NA	NA	NA	NA	GG	GG	GG	GG	GG	GG	GG	GG	GG	GG	GG	GG	GG	GG	GG	GG	GG	GG	GG	GG	GG	GG	GG	GG	GG	GG	GG	GG	GG	GG	GG	GG	GG	GG	GG	GG	GG	GG	GG
25363991|F|0-26:G>T-26:G>T	T/G	VU01	7561643	+	NA	NA	NA	NA	NA	NA	TT	TT	TT	TT	TT	TT	TT	TT	TT	TT	TT	TT	TT	TT	TT	TT	TT	TT	TT	TT	TT	TT	TT	TT	TT	TT	TT	GT	TT	TT	TT	TT	TT	TT	TT	NN	TT	TT	TT
25363708|F|0-46:C>T-46:C>T	C/T	VU01	7633798	+	NA	NA	NA	NA	NA	NA	CC	CC	CC	CC	CC	CC	CC	CC	CC	CC	CC	CC	CC	CC	CC	CC	CC	CC	CC	CC	CC	CC	CC	CC	CC	CC	CC	CC	CC	CC	CC	CC	CC	CC	CC	NN	CC	CC	CC
25364189|F|0-47:C>T-47:C>T	C/T	VU01	7636882	+	NA	NA	NA	NA	NA	NA	CC	CC	CC	CC	CC	CC	CC	CC	CC	CC	CC	CC	CC	CC	CC	CC	CC	CC	CC	CC	CC	CC	CC	CC	CC	CC	CC	CC	CC	CC	CC	CC	CC	CC	CC	CC	CC	CC	CC
14056711|F|0-50:T>C-50:T>C	T/C	VU01	7637575	+	NA	NA	NA	NA	NA	NA	TT	TT	TT	TT	TT	TT	TT	TT	TT	TT	TT	TT	TT	TT	TT	TT	TT	TT	TT	TT	TT	TT	TT	TT	TT	TT	TT	TT	TT	TT	TT	TT	TT	TT	TT	TT	TT	TT	TT
35154765|F|0-17:G>A-17:G>A	G/A	VU01	7877059	+	NA	NA	NA	NA	NA	NA	AG	GG	AG	GG	AG	AG	GG	AA	GG	GG	AG	GG	GG	GG	GG	GG	AG	GG	GG	GG	GG	GG	GG	GG	GG	GG	AG	GG	GG	GG	AG	GG	GG	AG	AG	GG	AG	GG	GG
100046923|F|0-63:G>A-63:G>A	A/G	VU01	8383078	+	NA	NA	NA	NA	NA	NA	AA	AA	AA	AA	AA	AA	AA	AA	NN	AA	AA	AA	AA	AA	AA	AA	AA	AA	AA	AA	AA	NN	AA	AA	NN	NN	AA	AA	AA	AA	AA	AA	GG	NN	NN	NN	AA	AA	AA
100011680|F|0-66:C>T-66:C>T	C/T	VU01	8838616	+	NA	NA	NA	NA	NA	NA	CC	CC	CC	CC	CC	CC	CC	CC	CC	CC	CC	CC	CC	CC	CC	CC	CC	CC	CC	CC	CC	CC	CC	CC	CC	CC	CC	CC	TT	CC	CC	CC	CC	CC	CC	CC	CC	CC	CC
14056997|F|0-28:A>G-28:A>G	A/G	VU01	8960314	+	NA	NA	NA	NA	NA	NA	AA	AA	AA	AA	AA	AA	AA	AA	AA	GG	AA	AA	AA	GG	AA	AA	AA	AA	AA	AA	GG	AA	AA	AG	AA	AA	AA	AA	AA	AA	AA	AA	AA	AA	AA	NN	AA	AA	AA
35153752|F|0-30:A>G-30:A>G	A/G	VU01	10232650	+	NA	NA	NA	NA	NA	NA	AA	AA	AA	AA	AA	AA	NN	AA	AA	GG	AA	AA	AA	GG	AA	NN	AA	AA	AA	AA	GG	NN	AA	NN	AA	NN	AA	AA	GG	AA	AA	AA	AA	NN	AA	NN	AA	AA	AA
25359362|F|0-47:T>G-47:T>G	G/T	VU01	10248841	+	NA	NA	NA	NA	NA	NA	GG	GG	GG	GG	GG	GG	GG	GG	GG	TT	GG	GT	GG	TT	GG	GG	GG	GG	GG	GG	TT	GG	GG	GG	GG	GG	GG	GG	GG	GG	GG	GG	GG	GG	GG	GG	GG	GG	GG
25355677|F|0-31:A>G-31:A>G	G/A	VU01	10289541	+	NA	NA	NA	NA	NA	NA	GG	GG	GG	GG	GG	GG	GG	GG	GG	GG	GG	GG	GG	GG	GG	GG	GG	GG	GG	GG	GG	GG	GG	GG	GG	GG	GG	GG	GG	GG	GG	GG	GG	GG	GG	GG	GG	GG	GG
25364232|F|0-68:G>C-68:G>C	G/C	VU01	10936159	+	NA	NA	NA	NA	NA	NA	GG	GG	GG	GG	GG	GG	GG	GG	GG	GC	GG	GG	GG	GC	GG	GG	GG	GG	GG	GG	GC	GG	GG	GG	GG	GG	GG	GG	GG	GG	GG	GG	GG	GG	GG	GG	GG	GG	GG
28497665|F|0-27:A>G-27:A>G	G/A	VU01	10946237	+	NA	NA	NA	NA	NA	NA	GG	GG	NN	GG	GG	GG	GG	GG	AG	AA	GG	GG	GG	AA	GG	GG	GG	GG	GG	GG	AA	GG	GG	GG	GG	GG	GG	GG	NN	GG	GG	GG	GG	GG	GG	AA	NN	GG	GG
25363437|F|0-51:G>C-51:G>C	C/G	VU01	10994116	+	NA	NA	NA	NA	NA	NA	CC	CC	CC	GG	CC	CC	GG	CC	CC	GG	CC	GG	CC	GG	GG	CC	CC	CC	GG	CC	GG	CC	CC	CC	CC	CC	CC	GG	CC	GG	CC	GG	GG	CC	CC	NN	CC	CC	CC
14075785|F|0-36:T>C-36:T>C	T/C	VU01	11006896	+	NA	NA	NA	NA	NA	NA	TT	TT	TT	TT	TT	TT	TT	TT	TT	TT	TT	TT	TT	TT	TT	TT	TT	TT	TT	TT	TT	TT	TT	TT	TT	TT	TT	TT	TT	TT	TT	TT	TT	TT	TT	CC	TT	TT	TT
35152646|F|0-21:A>T-21:A>T	A/T	VU01	12348806	+	NA	NA	NA	NA	NA	NA	AA	AA	AA	AA	AA	AA	AA	AA	AA	TT	AA	AA	AT	TT	AA	AA	AA	AA	AA	AA	TT	NN	AA	AA	AA	NN	NN	AA	AA	AA	AA	NN	AA	AA	AA	TT	AA	AA	AA
35153076|F|0-30:G>A-30:G>A	A/G	VU01	12627935	+	NA	NA	NA	NA	NA	NA	AA	AA	AA	AA	AA	AA	AA	AA	AA	GG	AA	NN	AA	GG	AA	AA	AA	AA	AA	AA	GG	AA	AA	AA	AA	AA	AA	AA	AA	AA	NN	AA	AA	AA	AA	NN	AA	AA	AA
35153859|F|0-27:G>T-27:G>T	G/T	VU01	12912545	+	NA	NA	NA	NA	NA	NA	GG	GG	GG	GG	GG	GG	GG	NN	GG	TT	GG	NN	GT	TT	GG	GG	GG	GG	GG	GG	TT	NN	GG	GG	GG	GG	GG	GG	GG	NN	GG	GG	GG	GG	GG	NN	GG	GG	GG
25356043|F|0-59:G>A-59:G>A	G/A	VU01	13515570	+	NA	NA	NA	NA	NA	NA	GG	GG	GG	GG	GG	GG	GG	AG	GG	GG	GG	GG	GG	GG	GG	GG	GG	GG	GG	GG	GG	GG	GG	GG	AG	GG	GG	GG	GG	GG	GG	GG	GG	GG	GG	GG	GG	GG	GG
25365718|F|0-53:T>C-53:T>C	C/T	VU01	14522776	+	NA	NA	NA	NA	NA	NA	NN	CC	CC	CC	CC	CC	CC	CC	CC	NN	CC	CC	CC	NN	CC	CC	CC	CC	CC	CC	NN	CC	CC	CC	CC	CC	CC	CC	CC	CC	CC	CC	CC	CC	CC	NN	CC	CC	CC
25363905|F|0-36:G>T-36:G>T	G	VU01	16618520	+	NA	NA	NA	NA	NA	NA	GG	GG	GG	GG	GG	GG	GG	GG	GG	GG	GG	GG	GG	GG	GG	GG	GG	GG	GG	GG	GG	GG	GG	GG	GG	GG	GG	GG	GG	GG	GG	GG	GG	GG	GG	GG	GG	GG	GG
25363705|F|0-16:A>G-16:A>G	A/G	VU01	16933703	+	NA	NA	NA	NA	NA	NA	AA	AA	AA	AA	AA	AA	AA	AA	AA	AA	AA	AA	AA	AA	AA	AA	AA	AA	AA	AA	AA	AA	AA	AA	AA	AA	AA	AA	AA	AA	AA	AA	AA	AA	AA	NN	AA	AA	AA
25363705|F|0-25:A>G-25:A>G	A/G	VU01	16933703	+	NA	NA	NA	NA	NA	NA	AA	AA	AA	AA	AA	AA	AA	AA	AA	AA	AA	AA	AA	AA	AA	AA	AA	AA	AA	AA	AA	AA	AA	AA	AA	AA	AA	AA	AA	AA	AA	AA	AA	AA	AA	GG	AA	AA	AA
25366131|F|0-17:G>T-17:G>T	T/G	VU01	16933769	+	NA	NA	NA	NA	NA	NA	GG	TT	TT	TT	TT	TT	TT	TT	TT	GG	TT	TT	TT	GG	TT	TT	TT	TT	TT	TT	GG	TT	TT	TT	TT	TT	TT	TT	TT	TT	TT	TT	TT	TT	TT	GG	TT	TT	TT
14058708|F|0-63:T>A-63:T>A	T	VU01	17146415	+	NA	NA	NA	NA	NA	NA	TT	TT	TT	TT	TT	TT	TT	TT	TT	TT	TT	TT	TT	TT	TT	TT	TT	TT	TT	TT	TT	TT	TT	TT	TT	TT	TT	TT	TT	TT	TT	TT	TT	TT	TT	NN	TT	TT	TT
35153620|F|0-65:A>G-65:A>G	A/G	VU01	17340696	+	NA	NA	NA	NA	NA	NA	GG	AA	AA	AA	AA	AA	AA	AA	AA	AA	AA	AA	NN	AA	AA	AA	AA	AA	AA	AA	AA	AA	AA	AA	AA	AA	AA	AA	AA	AA	AA	AA	AA	AA	AA	GG	AA	AA	AA
14058773|F|0-15:A>G-15:A>G	A	VU01	17349637	+	NA	NA	NA	NA	NA	NA	AA	AA	AA	AA	AA	AA	AA	AA	AA	AA	AA	AA	AA	AA	AA	AA	AA	AA	AA	AA	AA	AA	AA	AA	AA	AA	AA	AA	AA	AA	AA	AA	AA	AA	AA	AA	AA	AA	AA
14076846|F|0-27:A>G-27:A>G	A/G	VU01	17603382	+	NA	NA	NA	NA	NA	NA	AA	AA	AA	AA	AA	AA	AA	AA	AA	AA	AA	AA	AA	AA	AA	AA	AA	AA	AA	AA	AA	AA	AA	AA	AA	AA	AA	AA	AA	AA	AA	AA	AA	AA	AA	NN	AA	AA	AA
25365959|F|0-37:A>T-37:A>T	T	VU01	17826802	+	NA	NA	NA	NA	NA	NA	TT	TT	TT	TT	TT	TT	TT	TT	TT	TT	TT	TT	TT	TT	TT	TT	TT	TT	TT	TT	TT	TT	TT	TT	TT	TT	TT	TT	TT	TT	TT	TT	TT	TT	TT	NN	TT	TT	TT
25365959|F|0-6:G>A-6:G>A	G/A	VU01	17826802	+	NA	NA	NA	NA	NA	NA	GG	GG	GG	GG	GG	GG	GG	GG	GG	GG	GG	GG	GG	GG	GG	GG	GG	GG	GG	GG	GG	GG	GG	GG	GG	GG	GG	GG	GG	GG	GG	GG	GG	GG	GG	AA	GG	GG	GG
25366675|F|0-11:C>T-11:C>T	C	VU01	18415082	+	NA	NA	NA	NA	NA	NA	CC	CC	CC	CC	CC	CC	CC	CC	CC	CC	CC	CC	CC	CC	CC	CC	CC	CC	CC	CC	CC	CC	CC	CC	CC	CC	CC	CC	CC	CC	CC	CC	CC	CC	CC	CC	CC	CC	CC
35153969|F|0-51:G>C-51:G>C	C/G	VU01	18430521	+	NA	NA	NA	NA	NA	NA	CC	CC	CC	GG	CC	CC	GG	CC	CC	CC	CC	GG	CC	CC	GG	CC	CC	CC	GG	CC	CC	CC	CC	CC	CC	CC	CC	GG	GG	GG	CC	GG	GG	CC	CC	NN	CC	CC	CC
35152884|F|0-50:G>A-50:G>A	G/A	VU01	18464557	+	NA	NA	NA	NA	NA	NA	GG	GG	GG	AA	GG	GG	AA	GG	GG	GG	GG	AA	GG	GG	AA	GG	GG	GG	AA	GG	GG	GG	GG	GG	GG	GG	GG	AA	AA	NN	GG	AA	AA	GG	GG	NN	GG	GG	NN
14083114|F|0-11:A>G-11:A>G	A/G	VU01	18464623	+	NA	NA	NA	NA	NA	NA	AA	AA	AA	GG	AA	AA	GG	AA	AA	AA	AA	GG	AA	AA	GG	AA	AA	AA	GG	AA	AA	AG	AA	AA	AA	AA	AA	GG	GG	GG	AA	GG	GG	AA	AA	GG	AA	AA	AA
14073716|F|0-14:T>C-14:T>C	T	VU01	18487618	+	NA	NA	NA	NA	NA	NA	TT	TT	TT	TT	TT	TT	TT	TT	TT	TT	TT	TT	TT	TT	TT	TT	TT	TT	TT	TT	TT	TT	TT	TT	TT	TT	TT	TT	TT	TT	TT	TT	TT	TT	TT	TT	TT	TT	TT
14081529|F|0-20:G>T-20:G>T	G/T	VU01	18610244	+	NA	NA	NA	NA	NA	NA	GG	GG	GG	TT	GG	GG	TT	GG	GG	GG	GG	TT	GG	GG	TT	GG	GG	GG	TT	GG	GG	GG	GG	GG	GG	GG	GG	TT	TT	TT	GG	TT	TT	GG	GG	TT	GG	GG	GG
14077194|F|0-54:T>G-54:T>G	T	VU01	18610621	+	NA	NA	NA	NA	NA	NA	TT	TT	TT	TT	TT	TT	TT	TT	TT	TT	TT	TT	TT	TT	TT	TT	TT	TT	TT	TT	TT	TT	TT	TT	TT	TT	TT	TT	TT	TT	TT	TT	TT	TT	TT	NN	TT	TT	TT
14077194|F|0-58:T>C-58:T>C	T/C	VU01	18610621	+	NA	NA	NA	NA	NA	NA	TT	TT	TT	TT	TT	TT	TT	TT	TT	TT	TT	TT	TT	TT	TT	TT	TT	TT	TT	TT	TT	TT	TT	TT	TT	TT	TT	TT	TT	TT	TT	TT	TT	TT	TT	CC	TT	TT	TT
42215938|F|0-57:C>A-57:C>A	A	VU01	18629430	+	NA	NA	NA	NA	NA	NA	AA	AA	AA	AA	AA	AA	AA	AA	AA	AA	AA	AA	AA	AA	AA	AA	AA	AA	AA	AA	AA	NN	AA	AA	AA	AA	AA	AA	AA	AA	AA	AA	AA	AA	AA	NN	AA	AA	AA
25363408|F|0-66:T>A-66:T>A	A	VU01	18655362	+	NA	NA	NA	NA	NA	NA	AA	AA	AA	AA	AA	AA	AA	AA	AA	AA	AA	AA	AA	AA	AA	AA	AA	AA	AA	AA	AA	AA	AA	AA	AA	AA	AA	AA	AA	AA	AA	AA	AA	AA	AA	AA	AA	AA	AA
14073996|F|0-27:C>A-27:C>A	A/C	VU01	18700457	+	NA	NA	NA	NA	NA	NA	AA	AC	AC	AA	AC	AC	AA	NN	AC	AC	AC	AA	AA	AC	AC	AC	AC	AC	AC	AC	AC	AC	AA	AC	AC	AC	AC	AC	AA	AA	AC	AA	AA	AC	AC	AA	AC	AC	AA
35153624|F|0-19:T>C-19:T>C	T/C	VU01	18719544	+	NA	NA	NA	NA	NA	NA	TT	TT	TT	CC	TT	TT	CC	TT	TT	TT	TT	CC	TT	TT	CC	TT	TT	TT	CC	TT	TT	CC	TT	TT	TT	NN	NN	CC	CC	CC	TT	CC	CC	TT	TT	CC	TT	TT	TT
42215717|F|0-24:T>C-24:T>C	C/T	VU01	19829070	+	NA	NA	NA	NA	NA	NA	CC	CC	CC	CC	CC	CC	CC	CC	CC	CC	CC	TT	CC	CC	CC	CC	CC	CC	CC	NN	CC	CC	CC	CC	CC	CC	CC	CC	NN	CC	CC	NN	TT	CC	CC	NN	CC	NN	CC
35153071|F|0-62:T>A-62:T>A	T/A	VU01	19854595	+	NA	NA	NA	NA	NA	NA	TT	TT	TT	TT	TT	TT	TT	TT	TT	TT	TT	TT	TT	TT	TT	TT	TT	TT	TT	TT	TT	TT	TT	TT	TT	NN	TT	TT	TT	TT	TT	TT	TT	TT	TT	NN	TT	TT	TT
25359065|F|0-49:G>A-49:G>A	G/A	VU01	20088034	+	NA	NA	NA	NA	NA	NA	GG	GG	GG	GG	GG	GG	GG	GG	GG	GG	GG	GG	GG	GG	GG	GG	GG	GG	GG	GG	GG	GG	GG	GG	GG	GG	GG	GG	GG	GG	GG	GG	GG	GG	GG	GG	GG	GG	GG
42215970|F|0-32:T>A-32:T>A	T	VU01	20107269	+	NA	NA	NA	NA	NA	NA	TT	TT	TT	TT	TT	TT	TT	TT	TT	TT	TT	NN	TT	TT	TT	TT	TT	TT	TT	TT	TT	NN	TT	TT	TT	TT	TT	TT	TT	TT	TT	TT	NN	TT	TT	NN	TT	TT	TT
42215970|F|0-58:C>T-58:C>T	C/T	VU01	20107269	+	NA	NA	NA	NA	NA	NA	CC	CC	CC	CC	CC	CC	CC	CC	CC	CC	CC	NN	CC	CC	CC	CC	CC	CC	CC	CC	CC	NN	CC	CC	CC	CC	CC	CC	CC	CC	CC	CC	NN	CC	CC	NN	CC	CC	CC
25365059|F|0-21:T>G-21:T>G	G/T	VU01	20107752	+	NA	NA	NA	NA	NA	NA	GG	GG	GG	GG	GG	GG	GG	GG	GG	GG	GG	NN	GG	GG	GG	GG	GG	GG	GG	GG	GG	GG	GG	GG	GG	GG	GG	GG	GG	GG	GG	GG	NN	GG	GG	NN	GG	GG	GG
25364343|F|0-57:A>C-57:A>C	C/A	VU01	20265903	+	NA	NA	NA	NA	NA	NA	CC	CC	CC	CC	CC	CC	CC	CC	AC	CC	CC	CC	CC	CC	CC	CC	CC	CC	AC	CC	CC	CC	CC	CC	CC	CC	CC	CC	CC	CC	CC	CC	CC	CC	CC	CC	CC	CC	CC
25356354|F|0-42:C>G-42:C>G	C/G	VU01	20500740	+	NA	NA	NA	NA	NA	NA	CC	CC	CC	GC	CC	CC	CC	CC	CC	CC	CC	CC	CC	CC	CC	CC	CC	CC	CC	CC	CC	CC	CC	CC	CC	CC	CC	CC	CC	CC	CC	CC	CC	CC	CC	GG	CC	CC	CC
100011881|F|0-49:A>G-49:A>G	A	VU01	20511803	+	NA	NA	NA	NA	NA	NA	AA	AA	AA	AA	AA	AA	AA	AA	AA	AA	AA	AA	AA	AA	AA	AA	AA	AA	AA	AA	AA	AA	AA	AA	AA	AA	AA	AA	AA	AA	AA	AA	AA	NN	AA	NN	AA	AA	AA
25354174|F|0-21:C>A-21:C>A	C/A	VU01	20586212	+	NA	NA	NA	NA	NA	NA	CC	CC	CC	CC	CC	CC	CC	CC	CC	CC	CC	CC	CC	CC	CC	CC	CC	CC	CC	CC	CC	CC	CC	CC	CC	CC	CC	CC	CC	CC	CC	CC	CC	CC	CC	AA	CC	CC	CC
42774766|F|0-6:A>G-6:A>G	A/G	VU01	20975865	+	NA	NA	NA	NA	NA	NA	AA	AA	AG	AA	AA	AA	AA	AA	AA	AA	AA	AA	AA	AA	AA	AA	AA	AA	AA	AA	AA	AA	AA	AA	AA	AA	AA	AA	AA	AA	AG	AA	AA	AA	AA	AA	AA	AA	AG
14078851|F|0-5:A>C-5:A>C	A	VU01	20979346	+	NA	NA	NA	NA	NA	NA	AA	AA	AA	AA	AA	AA	AA	AA	AA	AA	AA	AA	AA	AA	AA	AA	AA	AA	AA	AA	AA	AA	AA	AA	AA	AA	AA	AA	AA	AA	AA	AA	AA	AA	AA	AA	AA	AA	AA
14078761|F|0-33:C>A-33:C>A	C/A	VU01	21272606	+	NA	NA	NA	NA	NA	NA	CC	CC	CC	CC	CC	CC	CC	CC	CC	CC	CC	CC	CC	CC	CC	CC	CC	CC	CC	CC	CC	CC	CC	CC	CC	CC	CC	CC	CC	CC	CC	CC	CC	CC	CC	CC	CC	CC	CC
14058851|F|0-28:C>T-28:C>T	C/T	VU01	21274009	+	NA	NA	NA	NA	NA	NA	CC	CC	CC	CC	CC	CC	CC	CC	CC	CC	CC	CC	CC	CC	CC	CC	CC	CC	CC	CC	CC	CC	CC	CC	CC	CC	CC	CC	CC	CC	CC	CC	CC	CC	CC	CC	CC	CC	CC
25363706|F|0-36:C>G-36:C>G	C/G	VU01	21529786	+	NA	NA	NA	NA	NA	NA	CC	CC	CC	CC	CC	CC	CC	CC	CC	CC	CC	CC	CC	CC	CC	CC	CC	CC	CC	CC	CC	CC	CC	CC	CC	CC	CC	CC	CC	CC	CC	CC	CC	CC	CC	CC	CC	CC	CC
25355822|F|0-45:C>G-45:C>G	C/G	VU01	21529852	+	NA	NA	NA	NA	NA	NA	CC	CC	CC	CC	CC	CC	CC	CC	CC	CC	CC	CC	CC	CC	CC	CC	CC	CC	CC	CC	CC	CC	CC	CC	CC	CC	CC	CC	CC	CC	CC	CC	CC	CC	CC	NN	CC	CC	CC
25363706|F|0-6:A>G-6:A>G	A/G	VU01	21714392	+	NA	NA	NA	NA	NA	NA	AA	AA	AA	AA	AA	AA	AA	AA	AA	AA	AA	AA	AA	AA	AA	AA	AA	AA	AA	AA	AA	AA	AA	AA	AA	AA	AA	AA	AA	AA	AA	AA	AA	AA	AA	AA	AA	AA	AA
100014851|F|0-25:C>G-25:C>G	C/G	VU01	21764314	+	NA	NA	NA	NA	NA	NA	CC	CC	CC	CC	CC	CC	CC	CC	NN	CC	CC	CC	CC	CC	CC	CC	CC	CC	CC	CC	CC	NN	CC	CC	CC	CC	CC	CC	CC	GG	CC	NN	CC	CC	CC	NN	CC	CC	CC
25355479|F|0-47:T>A-47:T>A	T/A	VU01	21826851	+	NA	NA	NA	NA	NA	NA	TT	TT	TT	TT	TT	TT	TT	TT	TT	TT	TT	TT	TT	TT	TT	TT	TT	TT	AT	TT	TT	TT	TT	TT	TT	TT	TT	TT	TT	TT	TT	TT	TT	TT	TT	TT	TT	TT	TT
25357307|F|0-39:A>T-39:A>T	A/T	VU01	21874042	+	NA	NA	NA	NA	NA	NA	NN	AA	AA	AA	AA	AA	AA	AA	AA	AA	AA	AA	AA	AA	AA	AA	AA	AA	AA	AA	AA	AA	AA	AA	AA	AA	AA	AA	AA	AA	AA	AA	AA	AA	AA	AA	AA	AA	AA
14058310|F|0-38:C>T-38:C>T	C/T	VU01	21874108	+	NA	NA	NA	NA	NA	NA	NN	CC	CC	CC	CC	CC	CC	CC	CC	CC	CC	CC	CC	CC	CC	CC	CC	CC	CC	CC	CC	CC	CC	CC	CC	CC	CC	CC	CC	CC	CC	CC	CC	CC	CC	CC	CC	CC	CC
14076486|F|0-52:G>A-52:G>A	G/A	VU01	21936373	+	NA	NA	NA	NA	NA	NA	GG	GG	GG	GG	GG	GG	GG	GG	GG	GG	GG	GG	GG	GG	GG	GG	GG	AG	GG	GG	GG	GG	GG	GG	GG	GG	GG	GG	GG	GG	GG	GG	GG	GG	GG	GG	GG	GG	GG
42215372|F|0-21:C>T-21:C>T	C/T	VU01	21946634	+	NA	NA	NA	NA	NA	NA	CC	CC	CC	CC	CC	CC	CC	CC	CC	CC	CC	CC	CC	CC	CC	CC	CC	CT	CC	CC	CC	CC	CC	CC	CC	CC	CC	CC	CC	CC	CC	CC	CC	CC	CC	NN	CC	CC	CC
25353601|F|0-26:A>G-26:A>G	A	VU01	22506634	+	NA	NA	NA	NA	NA	NA	AA	AA	AA	AA	AA	AA	AA	AA	AA	AA	AA	AA	AA	AA	AA	AA	AA	AA	AA	AA	AA	AA	AA	AA	AA	AA	AA	AA	AA	AA	AA	AA	AA	AA	AA	NN	AA	AA	AA
14085002|F|0-66:A>G-66:A>G	A/G	VU01	22517819	+	NA	NA	NA	NA	NA	NA	AA	NN	AA	AA	AA	AA	AA	AA	AA	AA	AA	AA	AA	AA	AA	AA	AA	NN	AA	AA	AA	AA	NN	AA	NN	AA	AA	AA	AA	AA	AA	AA	AA	AA	AA	AA	AA	AA	AA
14085003|F|0-48:G>A-48:G>A	G	VU01	22517819	+	NA	NA	NA	NA	NA	NA	GG	NN	NN	GG	GG	GG	GG	GG	GG	GG	GG	GG	GG	GG	GG	GG	GG	GG	GG	GG	GG	GG	NN	GG	GG	GG	GG	GG	GG	GG	NN	GG	GG	GG	GG	GG	NN	GG	GG
14085003|F|0-9:T>C-9:T>C	T/C	VU01	22517819	+	NA	NA	NA	NA	NA	NA	TT	NN	NN	TT	TT	TT	TT	TT	CT	TT	TT	TT	TT	TT	TT	TT	TT	TT	TT	TT	TT	TT	NN	TT	TT	TT	TT	TT	TT	TT	NN	TT	TT	TT	TT	TT	NN	TT	TT
25354770|F|0-8:A>G-8:A>G	A/G	VU01	22517885	+	NA	NA	NA	NA	NA	NA	AA	AA	AA	AA	AA	AA	AA	AA	AA	AA	AA	AA	AA	AA	AA	AA	AA	AA	AG	AA	AA	AA	NN	AA	AA	NN	AA	AA	AA	AA	AA	AA	AA	AA	AA	AA	AA	NN	AA
42215291|F|0-5:G>A-5:G>A	G	VU01	22682511	+	NA	NA	NA	NA	NA	NA	NN	GG	NN	GG	GG	GG	GG	GG	GG	GG	GG	GG	GG	GG	GG	GG	GG	GG	GG	GG	GG	NN	GG	GG	GG	GG	NN	GG	GG	GG	GG	GG	GG	GG	GG	NN	GG	GG	NN
25364109|F|0-11:C>G-11:C>G	C/G	VU01	22831461	+	NA	NA	NA	NA	NA	NA	CC	CC	CC	CC	CC	CC	CC	CC	CC	CC	CC	CC	CC	CC	CC	CC	CC	CC	CC	CC	CC	CC	CC	CC	CC	CC	CC	CC	CC	CC	CC	CC	CC	CC	CC	CC	CC	CC	CC
14082209|F|0-18:C>T-18:C>T	C/T	VU01	22867328	+	NA	NA	NA	NA	NA	NA	CC	CC	CC	CC	CC	CC	CC	CC	CC	CC	CC	CC	CC	CC	CC	CC	NN	CC	CC	CC	CC	CC	CC	CC	CC	TT	CC	CC	CC	NN	CC	CC	CC	NN	NN	NN	CC	TT	CC
35154602|F|0-45:A>T-45:A>T	T/A	VU01	22867328	+	NA	NA	NA	NA	NA	NA	TT	TT	TT	TT	TT	TT	TT	TT	TT	TT	TT	TT	TT	TT	TT	TT	AA	TT	TT	TT	TT	TT	TT	TT	TT	NN	TT	TT	TT	NN	TT	TT	TT	NN	AA	NN	TT	NN	TT
14076849|F|0-5:T>A-5:T>A	T/A	VU01	22867394	+	NA	NA	NA	NA	NA	NA	TT	TT	TT	TT	TT	TT	TT	TT	TT	TT	TT	TT	TT	TT	TT	TT	AA	TT	TT	TT	TT	TT	TT	TT	TT	AA	TT	TT	TT	TT	TT	TT	TT	TT	AA	TT	AT	AA	TT
28202901|F|0-24:T>A-24:T>A	T/A	VU01	22878677	+	NA	NA	NA	NA	NA	NA	TT	TT	TT	TT	TT	TT	TT	TT	TT	TT	TT	TT	TT	TT	TT	TT	AA	NN	TT	TT	NN	TT	TT	TT	TT	NN	TT	NN	TT	TT	TT	TT	TT	TT	AA	TT	TT	NN	TT
14075405|F|0-68:A>G-68:A>G	A/G	VU01	22878743	+	NA	NA	NA	NA	NA	NA	AA	AA	AA	AA	AA	AA	AA	AA	AA	AA	AA	AA	AA	AA	AA	AA	GG	AA	AA	AA	AA	AA	AA	AA	AA	AA	AA	AA	AA	AA	AA	AA	AA	AA	GG	AA	AA	AA	AA
14081669|F|0-59:T>G-59:T>G	T/G	VU01	22879536	+	NA	NA	NA	NA	NA	NA	TT	TT	TT	TT	TT	TT	TT	TT	TT	TT	TT	TT	TT	TT	TT	TT	GG	TT	TT	TT	TT	TT	TT	TT	TT	TT	TT	TT	TT	TT	TT	TT	TT	TT	GG	TT	TT	TT	TT
14074320|F|0-46:A>T-46:A>T	T/A	VU01	23155635	+	NA	NA	NA	NA	NA	NA	TT	TT	TT	TT	TT	TT	TT	TT	TT	TT	TT	TT	TT	TT	TT	TT	AA	TT	TT	TT	TT	TT	TT	TT	TT	TT	TT	TT	TT	NN	TT	TT	TT	TT	AA	NN	TT	TT	TT
14073731|F|0-5:A>G-5:A>G	A/G	VU01	23157275	+	NA	NA	NA	NA	NA	NA	AA	AA	AA	AA	AA	AA	AA	AA	AA	AA	AA	AA	AA	AA	AA	AA	GG	AA	AA	AA	AA	AA	AA	AA	AA	AA	AA	AA	AA	AA	AA	AA	AA	AA	GG	NN	AA	AA	AA
14085644|F|0-30:G>A-30:G>A	G/A	VU01	23210866	+	NA	NA	NA	NA	NA	NA	GG	GG	GG	GG	GG	GG	GG	GG	GG	GG	GG	GG	GG	GG	GG	GG	NN	GG	GG	GG	GG	GG	GG	GG	GG	GG	GG	GG	GG	GG	GG	GG	GG	GG	NN	GG	GG	GG	GG
14085644|F|0-43:A>G-43:A>G	A/G	VU01	23210866	+	NA	NA	NA	NA	NA	NA	AA	AA	AA	AA	AA	AA	AA	AA	AA	AA	AA	AA	AA	AA	AA	AA	GG	AA	AA	AA	AA	AA	AA	AA	AA	AA	AA	AA	AA	AA	AA	AA	AA	AA	GG	AA	AA	AA	AA
14076827|F|0-54:G>A-54:G>A	A/G	VU01	23243577	+	NA	NA	NA	NA	NA	NA	AA	AA	AA	AA	AA	AA	AA	AA	AA	AA	AA	AA	AA	AA	AA	AA	GG	AA	AA	AA	AA	AA	AA	AA	AA	AA	AA	AA	AA	AA	AA	AA	AA	AA	GG	AA	AA	AA	AA
14057415|F|0-27:C>A-27:C>A	C	VU01	23352234	+	NA	NA	NA	NA	NA	NA	CC	CC	CC	CC	CC	CC	CC	CC	CC	CC	CC	CC	CC	CC	CC	CC	CC	CC	CC	CC	CC	CC	CC	CC	CC	CC	CC	CC	CC	CC	CC	CC	CC	CC	CC	CC	CC	CC	CC
42215367|F|0-33:G>A-33:G>A	G/A	VU01	23389426	+	NA	NA	NA	NA	NA	NA	AA	GG	GG	GG	GG	GG	GG	GG	GG	GG	GG	GG	GG	GG	GG	GG	GG	GG	GG	AA	GG	GG	GG	AG	GG	GG	GG	GG	GG	GG	GG	GG	GG	GG	GG	AA	GG	GG	GG
25365696|F|0-10:C>A-10:C>A	C/A	VU01	23580103	+	NA	NA	NA	NA	NA	NA	CC	CC	CC	AA	CC	CC	AA	CC	CC	CC	AA	AA	AA	CC	AA	AA	CC	CC	AA	CC	CC	AA	CC	CC	CC	CC	CC	AA	CC	AA	CC	AA	AA	CC	CC	CC	CC	CC	CC
14082169|F|0-33:T>C-33:T>C	C/T	VU01	23586546	+	NA	NA	NA	NA	NA	NA	CC	TT	TT	CC	CC	TT	CC	CC	TT	CC	CC	CC	CC	CC	CC	CC	TT	TT	CC	CC	CC	CC	CC	CC	CC	CC	CC	CC	CC	CC	TT	CC	CC	TT	TT	CC	TT	CC	TT
35153532|F|0-35:T>C-35:T>C	T/C	VU01	23591689	+	NA	NA	NA	NA	NA	NA	TT	CC	CC	TT	TT	CC	TT	TT	CC	TT	TT	TT	TT	TT	TT	TT	CC	CC	TT	TT	NN	TT	TT	NN	NN	TT	TT	TT	TT	NN	CC	TT	TT	CC	CC	NN	NN	NN	NN
14073626|F|0-37:A>G-37:A>G	G/A	VU01	23667912	+	NA	NA	NA	NA	NA	NA	GG	AA	AA	GG	GG	AA	GG	GG	AA	GG	GG	GG	GG	GG	GG	GG	AA	AA	GG	GG	GG	GG	GG	GG	GG	GG	GG	GG	GG	GG	AA	GG	GG	AA	AA	GG	AA	GG	AA
14073485|F|0-28:A>G-28:A>G	A/G	VU01	23737941	+	NA	NA	NA	NA	NA	NA	AA	AA	AA	AG	AA	AA	AG	AA	AA	AA	AA	AA	AA	AG	AA	AG	AG	AG	AG	AG	AG	AG	AG	AG	AG	AA	AA	AG	AG	AG	AA	AG	AA	AA	GG	AG	AA	AA	AG
14074895|F|0-21:G>A-21:G>A	G/A	VU01	24106504	+	NA	NA	NA	NA	NA	NA	GG	GG	GG	GG	AA	GG	GG	GG	GG	GG	GG	GG	GG	GG	GG	GG	GG	GG	GG	GG	GG	GG	GG	GG	GG	GG	GG	GG	GG	GG	GG	GG	GG	GG	GG	GG	GG	GG	GG
14077388|F|0-26:G>A-26:G>A	A/G	VU01	24157829	+	NA	NA	NA	NA	NA	NA	AA	GG	GG	AA	NN	AA	AA	GG	GG	AA	AA	AA	AA	AA	AA	AA	AA	GG	AA	AA	AA	AA	AA	AA	AA	AA	AA	AA	AA	AA	GG	AA	AA	AA	GG	AA	GG	AA	AA
14076933|F|0-17:C>A-17:C>A	A/C	VU01	24191689	+	NA	NA	NA	NA	NA	NA	AA	CC	CC	AA	AA	AA	AA	CC	CC	AA	AA	AA	AA	AA	AA	AA	AA	CC	AA	AA	AA	AA	AA	AA	AA	AA	AA	AA	AA	AA	CC	AA	AA	AA	CC	AA	CC	AA	AA
14060630|F|0-34:C>A-34:C>A	C/A	VU01	24192229	+	NA	NA	NA	NA	NA	NA	CC	CC	CC	CC	CC	CC	CC	CC	CC	CC	CC	CC	CC	CC	CC	CC	CC	CC	CC	CC	CC	CC	CC	CC	CC	CC	CC	CC	CC	CC	CC	CC	CC	CC	CC	CC	CC	CC	CC
35155164|F|0-65:G>T-65:G>T	G/T	VU01	24207581	+	NA	NA	NA	NA	NA	NA	GG	TT	GT	GG	NN	GG	GG	TT	TT	GG	GG	GG	GG	GG	GG	GG	GG	TT	GG	GG	GG	NN	GG	GG	GG	GG	GG	GG	GG	GG	TT	GG	GG	GG	GT	NN	TT	GG	GG
35153769|F|0-38:T>C-38:T>C	T/C	VU01	24459559	+	NA	NA	NA	NA	NA	NA	CC	CC	TT	TT	TT	CC	TT	TT	TT	TT	TT	TT	TT	TT	TT	TT	CC	TT	CC	CC	TT	TT	CC	CT	NN	NN	CC	TT	NN	TT	TT	NN	TT	CC	TT	NN	NN	TT	CC
14074135|F|0-18:T>C-18:T>C	C/T	VU01	24498370	+	NA	NA	NA	NA	NA	NA	CC	CC	CC	CC	NN	CC	CC	TT	CT	CC	CC	CC	CC	CC	CC	CC	CC	TT	CC	CC	CC	CC	CC	CC	CC	CC	CC	CC	CC	CC	TT	CC	CC	CC	TT	CC	CC	CC	CC
14078696|F|0-49:A>G-49:A>G	G/A	VU01	24574589	+	NA	NA	NA	NA	NA	NA	GG	GG	GG	GG	AA	GG	GG	AA	AA	GG	GG	GG	GG	GG	GG	GG	GG	AA	GG	GG	GG	GG	GG	GG	GG	GG	GG	GG	GG	GG	AA	GG	GG	GG	AA	GG	GG	GG	GG
14077434|F|0-55:A>G-55:A>G	G/A	VU01	24633362	+	NA	NA	NA	NA	NA	NA	GG	GG	GG	GG	NN	GG	GG	AA	GG	GG	GG	GG	GG	GG	GG	NN	GG	AA	GG	GG	GG	GG	GG	GG	GG	GG	GG	GG	GG	GG	AG	GG	GG	GG	AA	GG	GG	GG	AA
14080062|F|0-8:T>G-8:T>G	T/G	VU01	24649627	+	NA	NA	NA	NA	NA	NA	TT	TT	TT	TT	GG	TT	TT	GG	TT	TT	TT	TT	TT	TT	TT	TT	TT	GG	TT	TT	TT	TT	TT	TT	TT	TT	TT	TT	TT	TT	GG	TT	TT	TT	TT	TT	TT	TT	GG
14085113|F|0-36:A>G-36:A>G	A/G	VU01	24651627	+	NA	NA	NA	NA	NA	NA	AA	AA	AA	AA	GG	AA	AA	GG	AA	AA	AA	AA	AA	AA	AA	NN	AA	AA	AA	AA	AA	AA	AA	AA	AA	AA	AA	AA	AA	AA	GG	AA	AA	AA	AA	AA	AG	AA	GG
14077655|F|0-39:C>T-39:C>T	T/C	VU01	24665514	+	NA	NA	NA	NA	NA	NA	TT	TT	TT	TT	CC	TT	TT	CC	TT	TT	TT	TT	TT	TT	TT	CC	TT	TT	TT	TT	TT	TT	TT	TT	TT	TT	TT	TT	TT	TT	CC	TT	TT	TT	TT	NN	TT	TT	CC
14086945|F|0-35:G>A-35:G>A	G/A	VU01	24665580	+	NA	NA	NA	NA	NA	NA	GG	GG	GG	GG	AA	GG	GG	AA	GG	GG	GG	GG	GG	GG	GG	AA	GG	GG	GG	GG	GG	AG	GG	GG	GG	GG	GG	GG	GG	GG	AA	GG	GG	GG	GG	GG	GG	GG	AA
14074256|F|0-60:T>C-60:T>C	C/T	VU01	24667565	+	NA	NA	NA	NA	NA	NA	CC	CC	CC	CC	TT	CC	CC	TT	CC	CC	CC	CC	CC	CC	CC	CC	CC	CC	CC	CC	CC	CC	CC	CC	CC	CC	CC	CC	CC	CC	TT	NN	CC	CC	CC	CC	CC	CC	TT
42215946|F|0-34:T>C-34:T>C	C/T	VU01	24773098	+	NA	NA	NA	NA	NA	NA	CC	CC	CC	CC	CC	CC	CC	CC	CC	CC	CC	CC	CC	CC	CC	TT	CC	CC	CC	CC	CC	CC	CC	CC	CC	CC	CC	CC	CC	CC	CC	CC	CC	CC	CC	CC	CC	CC	CC
14058768|F|0-33:G>A-33:G>A	G/A	VU01	24775074	+	NA	NA	NA	NA	NA	NA	GG	GG	GG	GG	NN	GG	GG	AA	GG	GG	GG	GG	GG	GG	GG	NN	GG	GG	GG	GG	GG	GG	GG	GG	NN	GG	GG	GG	GG	GG	GG	GG	GG	GG	GG	GG	GG	GG	GG
14058768|F|0-58:C>A-58:C>A	C/A	VU01	24775074	+	NA	NA	NA	NA	NA	NA	CC	CC	CC	CC	AA	CC	CC	NN	CC	CC	CC	CC	CC	CC	CC	AA	CC	CC	CC	CC	CC	CC	CC	CC	AA	CC	CC	CC	CC	CC	CC	CC	CC	CC	CC	CC	CC	CC	CC
14073477|F|0-66:T>A-66:T>A	T/A	VU01	24775140	+	NA	NA	NA	NA	NA	NA	TT	TT	TT	TT	AA	TT	TT	AA	TT	TT	TT	TT	TT	TT	TT	AA	TT	TT	TT	TT	TT	TT	TT	TT	AA	TT	TT	TT	TT	TT	TT	TT	TT	TT	TT	TT	TT	TT	TT
42215578|F|0-48:T>A-48:T>A	T/A	VU01	24851080	+	NA	NA	NA	NA	NA	NA	TT	TT	TT	TT	AA	TT	TT	NN	TT	TT	TT	TT	TT	TT	TT	TT	TT	TT	TT	TT	TT	TT	TT	TT	AA	TT	TT	TT	TT	TT	TT	TT	TT	TT	TT	TT	TT	TT	TT
42215610|F|0-29:T>A-29:T>A	A/T	VU01	24888172	+	NA	NA	NA	NA	NA	NA	AA	AA	AA	AA	AA	AA	AA	AA	AA	AA	AA	AA	AA	AA	AA	AA	AA	AA	AA	AA	AA	AA	AA	AA	AA	AA	NN	AA	AA	AA	AA	AA	AA	AA	AA	NN	AA	NN	AA
28497844|F|0-18:G>A-18:G>A	G/A	VU01	24907167	+	NA	NA	NA	NA	NA	NA	AA	GG	GG	GG	GG	AA	GG	AA	GG	GG	GG	GG	GG	GG	GG	GG	AA	AA	GG	AG	GG	GG	AA	AG	GG	GG	AA	GG	GG	GG	GG	GG	GG	AA	AA	AA	GG	GG	GG
42215422|F|0-25:G>A-25:G>A	G/A	VU01	24907233	+	NA	NA	NA	NA	NA	NA	GG	GG	GG	GG	GG	GG	GG	NN	GG	GG	GG	GG	GG	GG	GG	GG	GG	GG	GG	GG	NN	GG	GG	GG	GG	GG	NN	GG	NN	GG	GG	GG	GG	GG	GG	NN	GG	GG	GG
28498016|F|0-49:T>C-49:T>C	C/T	VU01	25021145	+	NA	NA	NA	NA	NA	NA	CC	CC	CC	CC	CC	CC	CC	CC	CC	TT	TT	TT	TT	TT	TT	CC	CC	CC	CC	CT	TT	TT	CC	CT	CC	CC	CC	CC	TT	CT	CC	TT	TT	CC	CC	NN	CC	CC	CC
35153921|F|0-53:A>G-53:A>G	A/G	VU01	25028203	+	NA	NA	NA	NA	NA	NA	AA	AA	AA	AA	AA	AA	AA	AA	AA	GG	GG	GG	GG	GG	GG	NN	AA	AA	AA	AA	GG	NN	NN	GG	AA	AA	AA	AA	GG	NN	AA	NN	GG	AA	AA	NN	AA	AA	AA
25355711|F|0-30:T>A-30:T>A	T/A	VU01	25093111	+	NA	NA	NA	NA	NA	NA	TT	TT	TT	TT	TT	TT	TT	TT	TT	TT	TT	TT	TT	TT	TT	TT	TT	TT	TT	TT	TT	TT	TT	TT	TT	TT	TT	TT	TT	TT	TT	TT	TT	TT	TT	TT	TT	TT	TT
14076189|F|0-6:T>C-6:T>C	C/T	VU01	25124571	+	NA	NA	NA	NA	NA	NA	CC	CC	TT	CC	CC	CC	CC	CC	CC	CC	CC	CC	CC	CC	TT	CC	CT	CC	CC	CT	CC	CC	CC	CC	CC	TT	CC	CC	CC	CC	CC	CC	CC	CC	CC	CC	TT	TT	CC
14055603|F|0-65:G>T-65:G>T	G/T	VU01	25158485	+	NA	NA	NA	NA	NA	NA	GG	GG	GG	TT	GG	GG	TT	GG	GG	GG	GG	GG	GG	GG	GG	GG	GG	GG	TT	GG	GG	GG	GG	NN	GG	GG	GG	TT	GG	TT	GG	TT	GG	GG	GG	GG	GG	GG	GG
14074827|F|0-20:T>C-20:T>C	T/C	VU01	25162687	+	NA	NA	NA	NA	NA	NA	TT	TT	NN	CC	TT	TT	CC	TT	TT	TT	TT	TT	TT	TT	NN	TT	TT	TT	CC	TT	TT	TT	TT	TT	TT	NN	TT	CC	TT	CC	TT	CC	TT	TT	TT	TT	NN	NN	TT
14074827|F|0-27:A>T-27:A>T	A/T	VU01	25162687	+	NA	NA	NA	NA	NA	NA	AA	AA	TT	NN	AA	AA	NN	AA	AA	AA	AA	AA	AA	AA	TT	AA	AA	AA	NN	AA	AA	AA	AA	AA	AA	TT	AA	NN	AA	NN	AA	NN	AA	AA	AA	AA	TT	TT	AA
35153082|F|0-61:C>A-61:C>A	C/A	VU01	25222602	+	NA	NA	NA	NA	NA	NA	CC	NN	CC	AA	CC	CC	AA	CC	CC	CC	AA	CC	AA	AA	AA	CC	CC	CC	AA	AC	CC	CC	AA	AA	AA	CC	NN	AA	CC	AA	CC	AA	NN	AA	CC	NN	CC	CC	CC
25364233|F|0-14:C>T-14:C>T	T/C	VU01	25222668	+	NA	NA	NA	NA	NA	NA	TT	TT	TT	CC	TT	TT	CC	TT	CT	TT	NN	TT	CC	CC	CC	TT	TT	TT	CC	CT	TT	TT	CC	CT	NN	NN	TT	CC	TT	CT	TT	CC	NN	CC	TT	NN	TT	TT	TT
28203134|F|0-12:T>C-12:T>C	T/C	VU01	25257891	+	NA	NA	NA	NA	NA	NA	TT	TT	TT	CC	TT	TT	CC	TT	TT	TT	TT	TT	TT	TT	CC	TT	TT	TT	CC	TT	TT	TT	CC	TT	CC	TT	TT	CC	TT	CC	TT	CC	TT	CC	TT	NN	TT	TT	TT
42215571|F|0-36:A>G-36:A>G	A/G	VU01	25319133	+	NA	NA	NA	NA	NA	NA	AA	AA	AA	AA	AA	AA	AA	AA	AA	AA	AA	AA	AA	AA	AA	AA	AA	AA	AA	AA	AA	AA	NN	AA	AA	AA	NN	AA	AA	AA	NN	AA	NN	AA	AA	NN	AA	AA	AA
42215529|F|0-48:T>G-48:T>G	G/T	VU01	25319199	+	NA	NA	NA	NA	NA	NA	GG	GG	GG	GG	GG	GG	GG	GG	GG	GG	GG	GG	GG	GG	GG	GG	GG	GG	GG	GG	GG	GG	GG	GG	GG	GG	GG	GG	GG	NN	GG	GG	GG	GG	GG	GG	GG	GG	GG
28497505|F|0-34:G>A-34:G>A	G	VU01	25414763	+	NA	NA	NA	NA	NA	NA	GG	GG	GG	GG	GG	GG	GG	GG	GG	GG	GG	GG	GG	GG	GG	GG	GG	GG	GG	GG	GG	GG	GG	GG	GG	GG	GG	GG	GG	GG	GG	GG	GG	GG	GG	GG	GG	GG	GG
14086693|F|0-46:C>A-46:C>A	C/A	VU01	25443693	+	NA	NA	NA	NA	NA	NA	AA	CC	AA	CC	AA	CC	CC	CC	CC	AA	CC	CC	CC	CC	CC	AA	CC	CC	AC	CC	AA	NN	CC	CC	CC	AA	CC	CC	CC	CC	CC	CC	CC	CC	CC	CC	AA	AA	CC
25366419|F|0-67:T>A-67:T>A	T	VU01	25446430	+	NA	NA	NA	NA	NA	NA	TT	TT	TT	TT	TT	TT	TT	TT	TT	TT	TT	TT	TT	TT	TT	TT	TT	TT	TT	TT	TT	TT	TT	TT	TT	TT	TT	TT	TT	TT	TT	TT	TT	TT	TT	TT	TT	TT	TT
14059344|F|0-12:A>G-12:A>G	A	VU01	25455687	+	NA	NA	NA	NA	NA	NA	AA	AA	AA	AA	NN	AA	AA	AA	AA	AA	AA	AA	AA	AA	AA	AA	AA	AA	AA	AA	AA	AA	AA	AA	AA	AA	AA	AA	AA	AA	AA	AA	AA	AA	AA	AA	AA	AA	AA
42215498|F|0-31:T>A-31:T>A	A	VU01	25477680	+	NA	NA	NA	NA	NA	NA	AA	AA	AA	AA	AA	AA	AA	AA	AA	AA	AA	AA	AA	AA	AA	AA	AA	AA	AA	AA	AA	AA	AA	AA	AA	AA	AA	AA	AA	AA	AA	AA	AA	AA	AA	AA	AA	AA	AA
14057309|F|0-52:G>A-52:G>A	G	VU01	25479169	+	NA	NA	NA	NA	NA	NA	GG	GG	GG	GG	GG	GG	GG	GG	GG	GG	GG	GG	GG	GG	GG	GG	GG	GG	GG	GG	GG	GG	GG	GG	GG	GG	GG	GG	GG	GG	GG	GG	GG	GG	GG	GG	GG	GG	GG
25354725|F|0-14:A>G-14:A>G	A	VU01	25483136	+	NA	NA	NA	NA	NA	NA	AA	AA	AA	AA	AA	AA	AA	AA	AA	AA	AA	AA	AA	AA	AA	AA	AA	AA	AA	AA	AA	AA	AA	AA	AA	AA	AA	AA	AA	AA	AA	AA	AA	AA	AA	AA	AA	AA	AA
25363898|F|0-10:C>T-10:C>T	T/C	VU01	25597168	+	NA	NA	NA	NA	NA	NA	TT	TT	CC	TT	TT	TT	TT	TT	TT	CC	CC	CC	CC	TT	TT	CC	TT	CT	TT	CT	CC	CC	TT	CT	TT	CC	TT	TT	CC	CT	TT	TT	CC	TT	TT	TT	CC	CC	TT
14073517|F|0-10:C>A-10:C>A	C/A	VU01	25626914	+	NA	NA	NA	NA	NA	NA	CC	CC	CC	CC	CC	CC	CC	CC	CC	CC	CC	CC	CC	CC	CC	CC	CC	CC	CC	CC	CC	CC	CC	CC	CC	CC	CC	CC	CC	CC	CC	CC	CC	CC	CC	CC	CC	NN	CC
14075544|F|0-63:C>T-63:C>T	C/T	VU01	25626980	+	NA	NA	NA	NA	NA	NA	CC	CC	CC	CC	CC	CC	CC	CC	CC	CC	CC	CC	CC	CC	CC	CC	CC	CC	CC	CC	CC	CC	CC	CC	CC	CC	CC	CC	CC	CC	CC	CC	NN	CC	CC	CC	CC	CC	CC
35153900|F|0-50:C>G-50:C>G	C/G	VU01	25641503	+	NA	NA	NA	NA	NA	NA	CC	CC	GG	CC	CC	CC	CC	NN	CC	GG	GG	GG	GG	CC	CC	GG	CC	CC	CC	GC	GG	GG	CC	GC	CC	GG	CC	CC	GG	CC	CC	CC	GG	NN	CC	NN	NN	GG	NN
42215564|F|0-52:T>G-52:T>G	T/G	VU01	25740011	+	NA	NA	NA	NA	NA	NA	TT	TT	TT	GG	TT	TT	GG	TT	TT	TT	TT	GG	TT	NN	TT	TT	TT	TT	GG	TT	TT	NN	TT	GT	TT	TT	TT	GG	GG	GG	NN	NN	GG	NN	TT	NN	TT	NN	NN
35153358|F|0-6:G>T-6:G>T	G/T	VU01	25834103	+	NA	NA	NA	NA	NA	NA	GG	GG	GG	GG	GG	GG	GG	GG	GG	NN	NN	GG	NN	GG	GG	GG	GG	GG	GG	GG	GG	GG	GG	GG	NN	GG	GG	GG	GG	GG	NN	GG	GG	GG	GG	NN	GG	GG	NN
14082506|F|0-27:C>A-27:C>A	C/A	VU01	25836174	+	NA	NA	NA	NA	NA	NA	CC	CC	CC	CC	CC	CC	CC	CC	CC	CC	CC	CC	CC	CC	CC	CC	CC	CC	CC	CC	CC	CC	CC	CC	CC	CC	CC	CC	CC	CC	CC	CC	CC	CC	CC	CC	CC	CC	CC
35153465|F|0-17:C>G-17:C>G	C/G	VU01	25923704	+	NA	NA	NA	NA	NA	NA	CC	NN	GG	CC	CC	CC	CC	CC	CC	CC	CC	CC	CC	CC	CC	CC	CC	CC	CC	CC	CC	NN	CC	CC	CC	GG	CC	CC	CC	NN	NN	CC	CC	CC	CC	NN	GG	GG	NN
14054519|F|0-61:G>C-61:G>C	G/C	VU01	26186575	+	NA	NA	NA	NA	NA	NA	GG	GG	GG	GG	GG	GG	GG	GG	GG	GG	GG	GG	GG	GG	GG	GG	GG	GG	GG	GG	GG	GG	GG	GG	GG	GG	GG	GG	GG	GG	GG	GG	GG	GG	GG	GG	GG	GG	GG
14086407|F|0-17:G>A-17:G>A	G/A	VU01	26250629	+	NA	NA	NA	NA	NA	NA	GG	GG	GG	GG	GG	GG	GG	GG	GG	GG	GG	GG	GG	GG	GG	GG	GG	GG	GG	GG	GG	GG	GG	GG	GG	GG	GG	GG	GG	GG	GG	GG	GG	GG	GG	GG	GG	GG	AA
14074848|F|0-23:G>C-23:G>C	G/C	VU01	26390629	+	NA	NA	NA	NA	NA	NA	GG	GG	GG	GG	GG	GG	GG	GG	GG	GG	GG	GG	GG	GG	GG	GG	GG	GG	GG	GG	GG	GG	GG	GG	GG	GG	GG	GG	GG	GG	GG	GG	GG	GG	GG	GG	GG	GG	CC
14074848|F|0-37:A>G-37:A>G	A/G	VU01	26390629	+	NA	NA	NA	NA	NA	NA	AA	AA	AA	AA	AA	AA	AA	AA	AA	AA	AA	AA	AA	AA	AA	AA	AA	AA	AA	AA	AA	AA	AA	AA	AA	AA	AA	AA	AA	AA	AA	AA	AA	AA	AA	AA	AA	AA	NN
25354561|F|0-34:T>A-34:T>A	T/A	VU01	26829292	+	NA	NA	NA	NA	NA	NA	TT	TT	TT	TT	TT	TT	TT	TT	TT	TT	TT	TT	TT	TT	TT	TT	TT	TT	TT	TT	TT	TT	TT	TT	TT	TT	TT	TT	TT	TT	TT	TT	TT	TT	TT	NN	TT	TT	TT
14074226|F|0-15:C>T-15:C>T	C/T	VU01	26834153	+	NA	NA	NA	NA	NA	NA	CC	TT	CC	CC	CC	CC	CC	CC	CC	CC	CC	CC	CC	CC	CC	CC	CC	CC	CC	CC	CC	CC	NN	CC	CC	CC	CC	CC	CC	CC	CC	CC	CC	CC	CC	CC	CC	CC	CC
100011111|F|0-22:A>G-22:A>G	A/G	VU01	26851028	+	NA	NA	NA	NA	NA	NA	AA	GG	AA	AA	AA	AA	AA	AA	AA	AA	AA	AA	AA	AA	AA	AA	AA	AA	AA	AA	AA	NN	GG	AA	AA	NN	AA	NN	AA	AA	AA	AA	AA	NN	AA	AA	AA	AA	AA
25355845|F|0-27:C>T-27:C>T	C/T	VU01	26880704	+	NA	NA	NA	NA	NA	NA	CC	TT	CC	CC	CC	CC	CC	CC	CC	CC	CC	CC	CC	CC	CT	CC	CC	CC	CC	CC	CC	CC	CC	CC	CC	CC	CC	CC	CC	CC	CC	CC	CC	CC	CC	CC	CC	CC	CC
14074361|F|0-34:G>C-34:G>C	G/C	VU01	27258363	+	NA	NA	NA	NA	NA	NA	GG	GG	GG	CC	GG	GG	CC	GG	GG	GG	GG	CC	GG	GG	GG	GG	GG	GG	GC	GG	GG	GG	CC	GG	GG	GG	GG	CC	CC	CC	GG	CC	GC	GG	GG	GG	GG	GG	GG
14076564|F|0-67:C>T-67:C>T	C/T	VU01	27290341	+	NA	NA	NA	NA	NA	NA	CC	CC	CC	CC	CC	CC	CC	CC	CT	CC	CC	CC	CC	CC	CC	CC	CC	TT	CC	CT	CC	CC	CC	CC	CC	CC	CC	CC	CC	CC	CC	CC	CC	CC	TT	CC	CC	CC	CC
14080538|F|0-22:G>T-22:G>T	G/T	VU01	27290700	+	NA	NA	NA	NA	NA	NA	GG	GG	GG	GG	GG	GG	GG	NN	GT	GG	GG	GG	GG	GG	GG	GG	GG	TT	GG	GG	NN	GG	GG	GG	GG	GG	GG	GG	GG	GG	GG	GG	GG	GG	TT	NN	GG	GG	GG
14079166|F|0-22:G>T-22:G>T	G/T	VU01	27290704	+	NA	NA	NA	NA	NA	NA	GG	GG	GG	GG	GG	GG	GG	GG	TT	GG	GG	GG	GG	GG	GG	GG	GG	TT	GG	GG	GG	GG	GG	GG	GG	GG	GG	GG	GG	GG	GG	GG	GG	GG	TT	GG	GG	GG	GG
14082378|F|0-13:T>C-13:T>C	T/C	VU01	27294204	+	NA	NA	NA	NA	NA	NA	TT	TT	TT	CC	TT	TT	CC	TT	TT	TT	TT	CC	TT	TT	TT	TT	TT	NN	CC	TT	TT	TT	TT	TT	TT	TT	TT	CC	CC	CC	TT	CC	CC	TT	NN	TT	TT	TT	TT
14076557|F|0-39:C>A-39:C>A	C/A	VU01	27338004	+	NA	NA	NA	NA	NA	NA	CC	CC	CC	AA	CC	CC	AA	CC	CC	CC	CC	AA	CC	CC	CC	CC	CC	AA	AA	CC	CC	AC	NN	CC	CC	CC	CC	AA	AA	AA	CC	AA	AA	CC	AA	CC	CC	CC	CC
14076557|F|0-53:C>G-53:C>G	C/G	VU01	27338004	+	NA	NA	NA	NA	NA	NA	CC	CC	CC	NN	CC	CC	NN	CC	CC	CC	CC	NN	CC	CC	CC	CC	CC	NN	NN	CC	CC	CC	GG	CC	CC	CC	CC	NN	NN	NN	CC	NN	NN	CC	NN	CC	CC	CC	CC
14082007|F|0-15:A>T-15:A>T	A/T	VU01	27365735	+	NA	NA	NA	NA	NA	NA	AA	AA	AA	AA	AA	AA	AA	AA	AA	AA	AA	AA	AA	AA	AA	AA	AA	TT	AA	AA	AA	AA	TT	AA	AA	AA	AA	AA	AA	AA	AA	AA	AA	AA	TT	AA	AA	AA	AA
35153357|F|0-25:A>T-25:A>T	A/T	VU01	27502964	+	NA	NA	NA	NA	NA	NA	AA	AA	AA	TT	AA	AA	TT	AA	AA	AA	AA	AA	AA	AA	AA	AA	AA	AA	TT	AA	AA	AA	NN	AA	AA	AA	AA	TT	TT	TT	AA	TT	AA	AA	AA	AA	AA	AA	AA
25362970|F|0-8:C>G-8:C>G	C/G	VU01	27797929	+	NA	NA	NA	NA	NA	NA	CC	GG	CC	CC	CC	CC	CC	CC	CC	CC	CC	CC	CC	CC	CC	CC	CC	CC	CC	CC	CC	CC	GG	CC	CC	CC	CC	CC	CC	CC	CC	CC	CC	CC	CC	CC	CC	CC	CC
25364218|F|0-48:C>T-48:C>T	C/T	VU01	27920678	+	NA	NA	NA	NA	NA	NA	CC	TT	CC	CC	CC	CC	CC	CC	CC	CC	CC	CC	CC	CC	CC	CC	CC	CC	CC	CC	CC	CC	CC	CC	CC	CC	CC	CC	CC	CC	CC	CC	CC	CC	CC	CC	CC	CC	CC
25366488|F|0-36:C>T-36:C>T	T/C	VU01	28092786	+	NA	NA	NA	NA	NA	NA	TT	TT	TT	CC	TT	TT	CC	TT	TT	TT	TT	CC	TT	TT	TT	TT	TT	TT	CC	TT	TT	TT	NN	TT	TT	TT	TT	CC	CC	CC	TT	CC	CC	TT	CT	TT	NN	TT	TT
25354694|F|0-29:C>T-29:C>T	C/T	VU01	28172515	+	NA	NA	NA	NA	NA	NA	CC	TT	CC	CC	CC	CC	CC	NN	CC	CC	CC	CC	CC	CC	CC	NN	CC	CC	CC	CC	CC	CC	TT	CC	CC	CC	CC	CC	CC	CC	CC	CC	CC	CC	CC	CC	CC	CC	CC
14082960|F|0-10:A>C-10:A>C	A/C	VU01	28190497	+	NA	NA	NA	NA	NA	NA	AA	CC	AA	AA	AA	AA	AA	AA	AA	AA	AA	AA	AA	AA	AA	CC	AA	AA	AA	AA	AA	AA	CC	AA	AA	AA	AA	AA	AA	AA	AA	AA	AA	AA	AA	AA	AA	AA	AA
100008879|F|0-30:A>G-30:A>G	A/G	VU01	28354101	+	NA	NA	NA	NA	NA	NA	AA	AA	AA	AA	AA	AA	AA	AA	AA	AA	AA	AA	AA	AA	AA	GG	AA	AA	AA	AA	AA	AA	AA	AA	AA	AA	AA	AA	AA	NN	AA	AA	AA	AA	AA	NN	AA	AA	AA
14077111|F|0-54:A>G-54:A>G	A/G	VU01	28415030	+	NA	NA	NA	NA	NA	NA	AA	GG	AA	AA	AA	AA	AA	AA	AA	AA	AA	AA	AA	AA	AA	GG	AA	AA	AA	AA	AA	AA	AA	AA	AA	AA	AA	AA	AA	AA	AA	AA	AA	AA	AA	AA	AA	NN	AA
14056300|F|0-64:T>A-64:T>A	T	VU01	28417962	+	NA	NA	NA	NA	NA	NA	TT	NN	TT	TT	TT	TT	TT	TT	TT	TT	TT	TT	TT	TT	TT	NN	TT	TT	TT	TT	TT	NN	TT	TT	TT	TT	TT	TT	TT	TT	TT	TT	TT	TT	TT	TT	TT	NN	TT
14073665|F|0-47:G>T-47:G>T	G/T	VU01	28479813	+	NA	NA	NA	NA	NA	NA	GG	GG	GG	GG	GG	GG	GG	GG	GG	GG	GG	GG	GG	GG	GG	TT	GG	GG	GG	GG	GG	GG	GG	GG	GG	GG	GG	GG	GG	GG	GG	GG	GG	GG	GG	GG	GG	GG	GG
42215943|F|0-45:A>T-45:A>T	T/A	VU01	28485649	+	NA	NA	NA	NA	NA	NA	TT	AA	TT	TT	TT	TT	TT	TT	TT	TT	TT	TT	TT	TT	TT	AA	TT	TT	TT	TT	TT	TT	TT	TT	TT	TT	NN	TT	TT	NN	NN	NN	TT	TT	TT	TT	TT	AA	NN
14085632|F|0-14:T>C-14:T>C	T/C	VU01	28494150	+	NA	NA	NA	NA	NA	NA	TT	CC	TT	TT	TT	TT	TT	TT	TT	TT	TT	TT	TT	TT	TT	CC	TT	TT	TT	TT	TT	TT	TT	TT	TT	TT	TT	TT	TT	TT	TT	TT	TT	TT	TT	TT	TT	TT	TT
28498024|F|0-12:T>C-12:T>C	T/C	VU01	28494525	+	NA	NA	NA	NA	NA	NA	TT	NN	TT	CC	TT	TT	TT	TT	TT	CC	CC	CC	CC	CC	CC	TT	TT	TT	CC	TT	CC	CC	TT	NN	TT	CC	TT	CC	NN	TT	TT	TT	CC	TT	TT	TT	CC	CC	TT
14073663|F|0-13:T>G-13:T>G	T/G	VU01	28494591	+	NA	NA	NA	NA	NA	NA	TT	TT	TT	TT	TT	TT	TT	TT	TT	TT	TT	TT	TT	TT	TT	GG	TT	TT	TT	TT	TT	TT	TT	TT	TT	TT	TT	TT	TT	TT	TT	TT	TT	TT	TT	TT	TT	TT	TT
14073663|F|0-30:T>C-30:T>C	T/C	VU01	28494591	+	NA	NA	NA	NA	NA	NA	TT	TT	TT	TT	TT	TT	TT	TT	TT	TT	TT	TT	TT	TT	TT	NN	TT	TT	TT	TT	TT	TT	TT	TT	TT	TT	TT	TT	TT	TT	TT	TT	TT	TT	TT	TT	TT	TT	TT
25359439|F|0-17:G>C-17:G>C	C/G	VU01	28509133	+	NA	NA	NA	NA	NA	NA	CC	CC	CC	GG	CC	CC	CC	CC	CC	GG	GG	GG	GG	GG	GG	CC	CC	CC	GG	GC	GG	GG	CC	GC	CC	GG	CC	GG	GG	CC	CC	CC	GG	CC	CC	CC	GG	GG	CC
42215484|F|0-60:T>C-60:T>C	T/C	VU01	28607302	+	NA	NA	NA	NA	NA	NA	CC	TT	TT	TT	TT	TT	TT	TT	TT	TT	TT	TT	TT	TT	TT	CT	TT	TT	TT	CT	TT	TT	CC	TT	TT	TT	TT	TT	TT	TT	TT	TT	TT	TT	TT	CC	TT	TT	TT
14086148|F|0-9:C>A-9:C>A	C/A	VU01	28647490	+	NA	NA	NA	NA	NA	NA	CC	NN	AA	CC	CC	CC	CC	CC	CC	CC	CC	CC	CC	CC	CC	NN	CC	CC	CC	CC	CC	CC	CC	CC	CC	CC	CC	CC	CC	CC	AA	CC	CC	CC	CC	CC	CC	CC	AA
14086651|F|0-5:G>A-5:G>A	G/A	VU01	28671200	+	NA	NA	NA	NA	NA	NA	GG	GG	AA	GG	GG	GG	GG	GG	GG	GG	GG	GG	GG	GG	GG	NN	GG	GG	GG	GG	GG	GG	GG	GG	GG	GG	GG	GG	GG	GG	AG	GG	GG	GG	GG	GG	GG	GG	AA
14083813|F|0-24:C>T-24:C>T	T/C	VU01	28671266	+	NA	NA	NA	NA	NA	NA	CC	CT	TT	TT	TT	TT	TT	TT	CC	TT	CC	TT	TT	CC	CC	NN	TT	TT	CT	CC	TT	CT	CC	TT	TT	CC	TT	TT	TT	TT	TT	TT	TT	TT	TT	CC	TT	CC	TT
14077514|F|0-36:A>G-36:A>G	A/G	VU01	28761055	+	NA	NA	NA	NA	NA	NA	AG	NN	NN	AA	AA	AA	AA	AA	AA	AA	AA	AA	AA	AA	AA	NN	AA	AA	AA	AA	AA	AA	AG	AA	AA	AA	AA	AA	AA	AA	NN	AA	AA	AA	AA	AA	NN	NN	NN
14085161|F|0-6:C>T-6:C>T	C/T	VU01	28785063	+	NA	NA	NA	NA	NA	NA	NN	NN	NN	CC	CC	CC	CC	CC	NN	CC	TT	CC	CT	TT	TT	NN	CC	CC	CC	TT	CC	TT	NN	CC	CC	TT	CC	CC	CC	CC	NN	CC	CC	CC	CC	NN	CC	NN	NN
14077067|F|0-42:T>C-42:T>C	T/C	VU01	28792964	+	NA	NA	NA	NA	NA	NA	TT	TT	CC	CT	TT	TT	TT	TT	TT	CT	TT	TT	TT	TT	TT	TT	TT	TT	TT	TT	TT	TT	TT	TT	TT	TT	TT	TT	TT	TT	CC	TT	TT	TT	TT	TT	CT	TT	CC
42215721|F|0-10:A>G-10:A>G	A/G	VU01	28798986	+	NA	NA	NA	NA	NA	NA	AA	AA	AA	AA	AA	AA	AA	AA	AA	AA	AA	AA	AA	AA	AA	AA	AA	AA	AA	AA	AA	AA	AA	AA	AA	AA	AA	AA	AA	AA	AA	AA	AA	AA	AA	AA	AA	AA	AA
14082213|F|0-62:G>A-62:G>A	G/A	VU01	28854103	+	NA	NA	NA	NA	NA	NA	AA	GG	GG	GG	GG	GG	GG	GG	GG	GG	GG	GG	GG	GG	GG	GG	GG	GG	GG	AG	GG	GG	AA	NN	GG	GG	GG	GG	GG	GG	GG	NN	GG	GG	GG	AA	GG	GG	GG
14086098|F|0-18:G>C-18:G>C	G/C	VU01	28885315	+	NA	NA	NA	NA	NA	NA	NN	GG	GG	GG	GG	GG	GG	GG	GG	GG	CC	GG	GG	CC	CC	CC	GG	GG	GG	CC	GG	CC	NN	GG	GG	CC	GG	GG	GG	GG	GG	GG	GG	GG	GG	NN	GG	GG	GG
14077371|F|0-45:C>T-45:C>T	C/T	VU01	28885381	+	NA	NA	NA	NA	NA	NA	TT	CC	CC	CC	CC	CC	CC	CC	CC	CC	CC	CC	CC	CC	CC	CC	CC	CC	CC	CT	CC	CC	TT	CC	CC	CC	CC	CC	CC	CC	CC	CC	CC	CC	CC	TT	CC	CC	CC
42215766|F|0-20:C>A-20:C>A	C/A	VU01	28887350	+	NA	NA	NA	NA	NA	NA	AA	CC	CC	CC	CC	CC	CC	CC	CC	CC	CC	CC	CC	CC	CC	NN	CC	CC	CC	AC	CC	CC	AA	CC	CC	CC	CC	CC	CC	CC	CC	CC	CC	CC	CC	AA	CC	CC	CC
42215766|F|0-25:C>A-25:C>A	C/A	VU01	28887350	+	NA	NA	NA	NA	NA	NA	NN	CC	CC	CC	CC	CC	CC	CC	CC	CC	CC	CC	CC	CC	CC	AA	CC	CC	CC	CC	CC	CC	NN	CC	CC	CC	CC	CC	CC	CC	CC	CC	CC	CC	CC	NN	CC	CC	CC
14073662|F|0-26:A>G-26:A>G	A/G	VU01	28901868	+	NA	NA	NA	NA	NA	NA	NN	AA	AA	AA	AG	AA	AA	AA	AA	AA	GG	AA	AA	GG	GG	NN	AA	AA	AA	GG	AA	AG	NN	NN	AA	GG	AA	NN	AA	AA	AA	AA	AA	AA	AA	NN	AA	AA	AA
14084862|F|0-39:C>T-39:C>T	C/T	VU01	28902707	+	NA	NA	NA	NA	NA	NA	NN	NN	CC	CC	CC	CC	CC	CC	TT	CC	CC	CC	CC	CC	CT	NN	CC	CC	CC	CC	CC	CC	NN	CC	CC	CC	CC	CC	CC	CC	CC	CC	CC	CC	CC	NN	NN	TT	CC
14084862|F|0-6:A>G-6:A>G	A/G	VU01	28902707	+	NA	NA	NA	NA	NA	NA	NN	GG	AA	AA	AA	AA	AA	AA	NN	AA	AA	AA	AA	AA	AA	NN	AA	AA	AA	AA	AA	AA	NN	AA	AA	AA	AA	AA	AA	AA	AA	AA	AA	AA	AA	NN	GG	NN	AA
14084863|F|0-13:G>A-13:G>A	A/G	VU01	28902707	+	NA	NA	NA	NA	NA	NA	GG	NN	AA	AA	AA	AA	AA	AA	NN	AA	AA	AA	AA	AA	AA	GG	AA	AA	AA	AG	AA	AA	GG	AA	AA	AA	AA	AA	AA	AA	AA	AA	AA	AA	AA	GG	NN	NN	AA
14074429|F|0-5:A>G-5:A>G	A/G	VU01	28915362	+	NA	NA	NA	NA	NA	NA	GG	GG	AA	AA	AA	AA	AA	AA	GG	AA	AA	AA	AA	AA	AA	GG	AA	AA	AA	AG	AA	AA	GG	AA	AA	AA	AA	AA	AA	AA	AA	AA	AA	AA	AA	GG	GG	GG	AA
14077255|F|0-22:T>G-22:T>G	T/G	VU01	28974163	+	NA	NA	NA	NA	NA	NA	TT	TT	TT	GG	GG	TT	TT	GG	TT	TT	TT	TT	TT	TT	TT	TT	GG	GG	NN	TT	TT	TT	GG	GG	GG	TT	GG	NN	TT	TT	TT	TT	TT	TT	GG	NN	TT	GG	GG
25363989|F|0-49:G>T-49:G>T	G/T	VU01	28974229	+	NA	NA	NA	NA	NA	NA	GG	GG	GG	GG	GG	GG	GG	GG	GT	GG	TT	GG	GG	TT	TT	GG	GG	GG	GG	GT	GG	TT	GG	GG	GG	TT	GG	GG	GG	GG	GG	GG	GG	GG	GG	GG	GG	GG	GG
14088014|F|0-21:T>G-21:T>G	G/T	VU01	28998157	+	NA	NA	NA	NA	NA	NA	TT	TT	TT	GG	GG	GG	GG	GG	TT	GG	GG	GG	GG	GG	GG	GG	GG	GG	GG	GT	GG	GG	GG	GG	GG	GG	GG	GG	GG	GG	TT	GG	GG	TT	GG	TT	GG	GG	GG
14088015|F|0-20:T>C-20:T>C	C/T	VU01	28998157	+	NA	NA	NA	NA	NA	NA	NN	TT	NN	CC	CC	CC	CC	CC	TT	CC	CC	CC	CC	CC	CC	CC	CC	CC	CC	CC	CC	CC	CC	CC	CC	CC	CC	CC	CC	CC	TT	CC	CC	TT	CT	NN	CC	CC	CC
25363221|F|0-46:G>A-46:G>A	G/A	VU01	29070382	+	NA	NA	NA	NA	NA	NA	GG	GG	GG	GG	GG	GG	GG	GG	GG	GG	GG	GG	GG	GG	GG	GG	GG	GG	GG	GG	GG	GG	GG	GG	GG	GG	GG	GG	GG	GG	GG	GG	GG	GG	GG	GG	GG	GG	GG
14074126|F|0-50:T>A-50:T>A	T/A	VU01	29076775	+	NA	NA	NA	NA	NA	NA	TT	TT	TT	TT	TT	AA	AA	TT	TT	AA	TT	AA	AA	TT	TT	TT	TT	TT	TT	TT	AA	AT	NN	TT	TT	TT	TT	TT	AA	AA	TT	AA	AA	TT	TT	TT	TT	TT	AA
14080280|F|0-36:T>C-36:T>C	T/C	VU01	29095085	+	NA	NA	NA	NA	NA	NA	TT	TT	TT	CC	TT	TT	TT	CC	TT	TT	TT	TT	TT	TT	TT	CC	TT	TT	CT	TT	TT	TT	CC	CT	CC	TT	TT	CC	TT	CT	CT	TT	TT	TT	TT	TT	CC	CC	TT
14074549|F|0-29:G>T-29:G>T	T/G	VU01	29183639	+	NA	NA	NA	NA	NA	NA	TT	TT	TT	TT	TT	GG	GG	TT	TT	GG	GG	GG	GG	GG	GG	TT	TT	TT	TT	GT	GG	GG	TT	GT	TT	GG	TT	TT	GG	GT	TT	GG	GG	TT	TT	TT	TT	TT	GG
25366549|F|0-12:T>A-12:T>A	T/A	VU01	29197476	+	NA	NA	NA	NA	NA	NA	AA	AA	AA	TT	AA	TT	TT	AA	AA	TT	TT	TT	TT	TT	TT	AA	AA	AA	TT	AT	TT	TT	NN	AT	NN	TT	AA	TT	TT	TT	AA	TT	TT	AA	AA	AA	NN	NN	TT
14077383|F|0-54:A>G-54:A>G	A/G	VU01	29204802	+	NA	NA	NA	NA	NA	NA	AA	AA	AA	NN	AA	AA	AA	AA	AA	AA	AA	AA	AA	AA	AA	NN	AA	AA	NN	AA	AA	AA	GG	AA	GG	AA	AA	NN	AA	AA	AA	AA	AA	AA	AA	AA	GG	GG	AA
14075274|F|0-62:T>A-62:T>A	A/T	VU01	29257795	+	NA	NA	NA	NA	NA	NA	TT	TT	TT	AA	TT	AA	AA	TT	TT	AA	AA	AA	AA	AA	AA	TT	TT	AA	AA	AA	AA	AA	TT	TT	NN	AA	AT	NN	AA	AA	NN	AA	AA	NN	AA	NN	TT	TT	AA
14076687|F|0-37:T>A-37:T>A	A/T	VU01	29279250	+	NA	NA	NA	NA	NA	NA	TT	TT	TT	TT	TT	AA	AA	TT	TT	AA	AA	AA	AA	AA	AA	TT	TT	AA	TT	AT	AA	AA	TT	AT	TT	AA	AA	TT	AA	AT	TT	AA	AA	TT	AA	TT	TT	TT	AA
14074168|F|0-7:T>G-7:T>G	T/G	VU01	29329323	+	NA	NA	NA	NA	NA	NA	TT	TT	TT	TT	TT	GG	GG	TT	TT	GG	GG	GG	GG	GG	GG	GG	TT	TT	TT	GT	GG	GT	TT	GT	TT	GG	TT	TT	GG	GG	TT	GG	GG	TT	TT	TT	TT	GT	TT
25362930|F|0-30:T>C-30:T>C	T/C	VU01	29350070	+	NA	NA	NA	NA	NA	NA	TT	TT	TT	TT	TT	TT	TT	TT	TT	TT	TT	TT	TT	TT	TT	TT	TT	TT	TT	TT	TT	TT	CC	TT	CC	TT	TT	TT	TT	TT	TT	TT	TT	TT	TT	TT	CC	CC	TT
14084762|F|0-39:G>A-39:G>A	A/G	VU01	29406799	+	NA	NA	NA	NA	NA	NA	GG	GG	GG	AA	GG	AA	AA	AA	GG	AA	AA	AA	AA	AA	AA	AA	GG	GG	AA	AG	AA	AA	GG	AG	AA	AA	GG	AA	AA	NN	GG	AA	AA	GG	GG	GG	AA	AA	AA
14081919|F|0-68:T>G-68:T>G	T/G	VU01	29447514	+	NA	NA	NA	NA	NA	NA	TT	TT	TT	GG	TT	TT	GG	GG	TT	GG	TT	GG	TT	TT	GG	TT	TT	TT	GG	TT	GG	TT	TT	GT	GG	GG	TT	GG	GG	TT	TT	GG	GG	TT	TT	TT	TT	GG	TT
14073625|F|0-30:A>C-30:A>C	C/A	VU01	29450694	+	NA	NA	NA	NA	NA	NA	AA	AA	AA	CC	AA	CC	CC	CC	AA	CC	CC	CC	CC	CC	CC	CC	AA	AA	CC	AC	CC	CC	AA	AC	CC	CC	AA	CC	CC	CC	AA	CC	CC	AA	AA	AA	CC	CC	CC
28497998|F|0-63:T>C-63:T>C	T/C	VU01	29450903	+	NA	NA	NA	NA	NA	NA	TT	TT	TT	TT	TT	CC	TT	TT	TT	TT	CC	TT	CC	NN	TT	CC	TT	TT	TT	CT	TT	NN	TT	TT	TT	TT	TT	TT	TT	CC	TT	TT	TT	TT	TT	TT	NN	TT	CC
14074000|F|0-37:G>A-37:G>A	A/G	VU01	29454396	+	NA	NA	NA	NA	NA	NA	GG	GG	GG	AA	GG	AA	AA	AA	GG	AA	AA	AA	AA	AA	AA	AA	GG	GG	AA	AG	AA	AA	GG	AG	AA	AA	GG	AA	AA	AA	GG	AA	AA	GG	GG	GG	AA	AA	AA
14085020|F|0-55:G>T-55:G>T	G/T	VU01	29470435	+	NA	NA	NA	NA	NA	NA	GG	GG	GG	TT	GG	NN	TT	TT	GG	TT	NN	TT	NN	GG	NN	NN	GG	GG	TT	GG	TT	GG	GG	GT	TT	TT	GG	TT	TT	NN	GG	TT	TT	GG	GG	GG	GG	TT	GG
14084908|F|0-14:A>G-14:A>G	A/G	VU01	29472276	+	NA	NA	NA	NA	NA	NA	AA	AA	AA	GG	AA	GG	GG	GG	AA	GG	AA	GG	AA	AA	GG	AA	AA	AA	GG	AA	GG	AA	AA	AG	GG	GG	AA	GG	GG	AA	AA	GG	GG	AA	AA	AA	AA	GG	AA
14076030|F|0-49:G>A-49:G>A	G/A	VU01	29582235	+	NA	NA	NA	NA	NA	NA	AA	GG	GG	GG	AA	GG	GG	AA	GG	GG	GG	GG	GG	GG	GG	GG	AA	AA	GG	AG	GG	GG	AA	GG	GG	GG	AA	GG	GG	GG	GG	GG	GG	AA	GG	NN	GG	GG	GG
14079757|F|0-32:C>T-32:C>T	C/T	VU01	29582301	+	NA	NA	NA	NA	NA	NA	TT	CC	CC	CC	TT	CC	CC	TT	CC	CC	CC	CC	CC	CC	CC	CC	TT	TT	CC	CT	CC	CC	TT	CC	CC	CC	TT	CC	CC	CC	CC	CC	CC	TT	CC	CC	CC	CC	CC
25366487|F|0-46:A>G-46:A>G	A/G	VU01	29587880	+	NA	NA	NA	NA	NA	NA	AA	AA	AA	AA	AA	AA	AA	AA	AA	AA	AA	AA	AA	AA	AA	AA	AA	AA	AA	AA	AA	AA	AA	AA	AA	AA	AA	AA	AA	AA	AA	AA	AA	AA	AA	AA	AA	AA	AA
14085540|F|0-16:T>C-16:T>C	T/C	VU01	29588093	+	NA	NA	NA	NA	NA	NA	CC	TT	TT	TT	CC	TT	TT	CC	TT	TT	TT	TT	TT	TT	TT	TT	CC	CC	CT	CT	TT	TT	CC	TT	TT	TT	CC	TT	TT	TT	TT	TT	TT	CC	TT	TT	TT	TT	TT
35153219|F|0-38:G>A-38:G>A	G/A	VU01	29630906	+	NA	NA	NA	NA	NA	NA	AA	GG	GG	GG	AA	GG	GG	AA	GG	GG	GG	GG	GG	GG	GG	GG	AA	AA	NN	GG	GG	NN	AA	GG	GG	GG	AA	GG	GG	GG	GG	NN	GG	AA	GG	AA	GG	GG	GG
25360353|F|0-31:T>C-31:T>C	T/C	VU01	29646202	+	NA	NA	NA	NA	NA	NA	TT	TT	TT	TT	TT	CT	TT	TT	TT	TT	TT	TT	TT	TT	TT	TT	TT	TT	TT	TT	TT	TT	TT	TT	TT	TT	TT	TT	TT	TT	TT	TT	TT	TT	TT	TT	NN	TT	TT
14081636|F|0-17:A>T-17:A>T	T/A	VU01	29649907	+	NA	NA	NA	NA	NA	NA	TT	TT	TT	AA	TT	TT	AA	TT	TT	TT	TT	AA	AA	AA	TT	AA	TT	TT	AT	AT	TT	AT	TT	AT	TT	TT	TT	AA	AA	AA	TT	AA	AA	TT	TT	TT	TT	TT	TT
14075120|F|0-41:T>A-41:T>A	T/A	VU01	29764508	+	NA	NA	NA	NA	NA	NA	AA	TT	TT	TT	AA	TT	TT	AA	TT	TT	TT	TT	TT	TT	TT	TT	TT	AA	AT	AT	TT	TT	AA	AT	TT	TT	AA	TT	TT	TT	TT	TT	TT	AA	TT	AA	TT	TT	TT
14085963|F|0-51:G>A-51:G>A	A/G	VU01	29768860	+	NA	NA	NA	NA	NA	NA	GG	GG	GG	AA	GG	AA	AA	GG	GG	AA	AA	AA	AA	AA	AA	AA	GG	GG	AA	AG	AA	AA	GG	AG	AA	AA	GG	AA	AA	AA	GG	AA	AA	GG	GG	GG	AA	AA	AA
28203196|F|0-52:C>T-52:C>T	C/T	VU01	29788823	+	NA	NA	NA	NA	NA	NA	CC	CC	CC	CC	CC	TT	CC	CC	CC	TT	TT	CC	CC	CC	CC	CC	CC	CC	CC	CC	TT	CC	CC	CC	CC	TT	CC	CC	CC	CC	CC	CC	CC	CC	CC	CC	CC	CC	CC
35154020|F|0-40:T>A-40:T>A	A/T	VU01	29856163	+	NA	NA	NA	NA	NA	NA	TT	TT	TT	AA	AA	AA	AA	AA	AT	AA	AA	AA	AA	AA	AA	AA	TT	TT	AA	AA	AA	NN	TT	AA	AA	AA	AT	AA	AA	AA	TT	AA	AA	TT	TT	TT	AA	AA	AA
14075661|F|0-51:A>G-51:A>G	G/A	VU01	29873112	+	NA	NA	NA	NA	NA	NA	AA	AA	AA	GG	GG	GG	GG	GG	AA	GG	GG	GG	GG	GG	GG	GG	AA	AA	GG	GG	GG	GG	AA	GG	GG	GG	AG	GG	GG	GG	AA	GG	GG	AA	AA	AA	GG	AA	AA
14079504|F|0-11:T>C-11:T>C	T/C	VU01	29933138	+	NA	NA	NA	NA	NA	NA	TT	TT	TT	CC	TT	CC	TT	CC	TT	TT	TT	TT	CC	TT	TT	TT	TT	TT	TT	TT	TT	CC	TT	TT	CC	TT	CT	TT	TT	CT	TT	TT	TT	TT	TT	TT	TT	TT	TT
42215653|F|0-61:C>G-61:C>G	C/G	VU01	29939120	+	NA	NA	NA	NA	NA	NA	CC	CC	CC	CC	CC	CC	NN	CC	CC	CC	CC	CC	CC	CC	CC	CC	CC	CC	CC	CC	CC	NN	NN	CC	CC	CC	CC	CC	CC	NN	CC	CC	CC	NN	CC	NN	CC	NN	NN
25354583|F|0-31:G>C-31:G>C	G/C	VU01	30071815	+	NA	NA	NA	NA	NA	NA	GG	GG	GG	GG	GG	GG	GG	GG	GG	GG	GG	GG	GG	GG	GG	GG	GG	GG	GG	GG	GG	GG	GG	GG	GG	GG	GG	GG	CC	GG	GG	CC	GG	GG	GG	GG	GG	GG	GG
14054387|F|0-13:G>C-13:G>C	G/C	VU01	30102867	+	NA	NA	NA	NA	NA	NA	GG	GG	GG	CC	GG	GG	GG	GG	GG	CC	GG	GG	CC	GG	CC	GG	GG	GG	CC	GG	CC	CC	GG	GG	GG	CC	GG	CC	CC	GC	GG	CC	GG	GG	GG	NN	CC	GG	GG
44876340|F|0-32:T>C-32:T>C	T/C	VU01	30135147	+	NA	NA	NA	NA	NA	NA	TT	TT	TT	TT	TT	TT	TT	TT	TT	TT	TT	TT	TT	TT	TT	TT	TT	TT	TT	TT	TT	TT	TT	TT	TT	TT	TT	TT	TT	TT	TT	TT	TT	TT	TT	TT	TT	TT	TT
25364103|F|0-36:G>A-36:G>A	G	VU01	30217153	+	NA	NA	NA	NA	NA	NA	GG	GG	GG	GG	GG	GG	GG	GG	GG	GG	GG	GG	GG	GG	GG	GG	GG	GG	GG	GG	GG	GG	GG	GG	GG	GG	GG	GG	GG	GG	GG	GG	GG	GG	GG	GG	GG	GG	GG
25364760|F|0-12:G>A-12:G>A	G	VU01	30267018	+	NA	NA	NA	NA	NA	NA	GG	GG	GG	GG	GG	GG	GG	GG	GG	GG	GG	GG	GG	GG	GG	GG	GG	GG	GG	GG	GG	GG	GG	GG	GG	GG	GG	GG	GG	GG	GG	GG	GG	GG	GG	GG	GG	GG	GG
25365114|F|0-22:C>G-22:C>G	C	VU01	30286828	+	NA	NA	NA	NA	NA	NA	CC	CC	CC	CC	CC	CC	CC	CC	CC	CC	CC	CC	CC	CC	CC	CC	CC	CC	CC	CC	CC	CC	CC	CC	CC	CC	CC	CC	CC	CC	CC	CC	CC	CC	CC	CC	CC	CC	CC
25362937|F|0-10:C>T-10:C>T	T	VU01	30286884	+	NA	NA	NA	NA	NA	NA	TT	TT	TT	TT	TT	TT	TT	TT	TT	TT	TT	TT	TT	TT	TT	TT	TT	TT	TT	TT	TT	TT	TT	TT	TT	TT	TT	TT	TT	TT	TT	TT	TT	TT	TT	TT	TT	TT	TT
14056433|F|0-36:C>T-36:C>T	C/T	VU01	30288334	+	NA	NA	NA	NA	NA	NA	CC	CC	CC	CC	CC	CC	CC	CC	CC	CC	CC	CT	CC	CC	CC	CC	CC	CC	CC	CC	CC	CC	CC	CC	CC	CC	CC	CC	CC	CC	CC	CC	CC	CC	CC	CC	CC	CC	CC
35153123|F|0-41:T>G-41:T>G	G/T	VU01	30355102	+	NA	NA	NA	NA	NA	NA	GG	GG	GG	GG	GG	GG	GG	GG	GG	GG	GG	TT	GG	GG	TT	GG	GG	GG	GG	GG	GG	GT	GG	GG	GG	GG	GG	GG	GG	GG	GG	GG	GG	GG	GG	GG	TT	GG	GG
42215341|F|0-57:C>G-57:C>G	G	VU01	30388394	+	NA	NA	NA	NA	NA	NA	GG	GG	GG	GG	GG	GG	GG	NN	GG	GG	GG	GG	GG	GG	GG	GG	GG	GG	GG	GG	GG	GG	GG	GG	GG	GG	GG	GG	GG	GG	GG	GG	GG	GG	GG	GG	GG	GG	GG
14057040|F|0-59:C>G-59:C>G	C	VU01	30427419	+	NA	NA	NA	NA	NA	NA	CC	CC	CC	CC	CC	CC	CC	CC	CC	CC	CC	CC	CC	CC	CC	CC	CC	CC	CC	CC	CC	CC	CC	CC	CC	CC	CC	CC	CC	CC	CC	CC	CC	CC	CC	CC	CC	CC	CC
25363742|F|0-11:T>A-11:T>A	A	VU01	30623092	+	NA	NA	NA	NA	NA	NA	AA	AA	AA	AA	AA	AA	AA	AA	AA	AA	AA	AA	AA	AA	AA	AA	AA	AA	AA	AA	AA	AA	AA	AA	AA	AA	AA	AA	AA	AA	AA	AA	AA	AA	AA	AA	AA	AA	AA
14086014|F|0-61:G>A-61:G>A	A/G	VU01	30678294	+	NA	NA	NA	NA	NA	NA	AA	AA	AA	AA	AA	GG	AA	AA	AA	AA	AA	AA	AA	AA	AA	AA	AG	AA	AA	AA	AA	AA	AA	AA	AA	AA	AA	AA	AA	AA	AA	AA	AA	GG	AA	AA	AA	AA	AA
14076909|F|0-11:C>A-11:C>A	C/A	VU01	30678360	+	NA	NA	NA	NA	NA	NA	CC	CC	CC	CC	CC	AA	CC	CC	CC	CC	CC	CC	CC	CC	CC	CC	AC	CC	CC	CC	CC	CC	CC	CC	CC	CC	CC	CC	CC	CC	CC	CC	CC	AA	CC	CC	CC	CC	CC
14076883|F|0-15:T>C-15:T>C	T/C	VU01	30701479	+	NA	NA	NA	NA	NA	NA	TT	TT	TT	TT	TT	CC	TT	TT	TT	TT	TT	TT	TT	TT	TT	TT	CT	TT	TT	TT	TT	TT	TT	TT	TT	TT	TT	TT	TT	TT	TT	TT	TT	CC	TT	TT	TT	TT	TT
14084825|F|0-26:T>C-26:T>C	T/C	VU01	30711748	+	NA	NA	NA	NA	NA	NA	TT	CC	TT	TT	CC	NN	TT	CC	TT	CC	CC	TT	CC	CC	TT	CC	TT	TT	TT	CT	CC	CT	CC	CC	CC	TT	CT	TT	NN	TT	TT	TT	TT	NN	TT	NN	CT	CC	CC
25366125|F|0-30:C>T-30:C>T	C/T	VU01	30711773	+	NA	NA	NA	NA	NA	NA	CC	CC	CC	CC	CC	CT	CC	CC	CT	CC	CC	CC	CC	CC	CC	CC	CT	CC	CC	CC	CC	CT	CC	CC	CC	CC	CC	CC	CC	CC	CC	CC	CC	CT	CC	CC	CC	CC	CC
35153564|F|0-62:G>A-62:G>A	A/G	VU01	30729842	+	NA	NA	NA	NA	NA	NA	AA	GG	AA	AA	GG	GG	AA	GG	AA	GG	GG	AA	GG	NN	AA	GG	AG	AA	AA	AG	GG	AG	GG	AG	GG	AA	AG	AA	NN	NN	AA	AA	NN	GG	AA	AA	GG	GG	GG
14073548|F|0-14:A>C-14:A>C	A/C	VU01	30733488	+	NA	NA	NA	NA	NA	NA	AA	AA	AA	AA	AA	CC	AA	AA	AA	AA	AA	AA	AA	AA	AA	AA	AC	AA	AA	AA	AA	AA	AA	AA	AA	AA	AA	AA	AA	AA	AA	AA	AA	CC	AA	AA	AA	AA	AA
14076468|F|0-63:G>T-63:G>T	G/T	VU01	30766766	+	NA	NA	NA	NA	NA	NA	GG	TT	GG	GG	TT	GG	GG	TT	GG	TT	TT	GG	TT	TT	GG	TT	GG	GG	GG	GT	TT	TT	TT	GT	TT	GG	GT	GG	GG	GG	GG	GG	GG	GG	GG	NN	TT	TT	TT
14079178|F|0-12:T>C-12:T>C	T/C	VU01	30766832	+	NA	NA	NA	NA	NA	NA	CT	TT	CT	CT	TT	TT	CT	TT	CT	TT	TT	CT	TT	TT	CT	TT	CT	TT	CT	CT	TT	TT	TT	CT	TT	CT	TT	CT	CT	CT	CT	CT	CT	TT	CT	CT	TT	TT	TT
35153613|F|0-44:G>A-44:G>A	G/A	VU01	30768266	+	NA	NA	NA	NA	NA	NA	AG	GG	AG	AG	GG	GG	AG	GG	AG	GG	GG	AG	GG	GG	AG	GG	AG	GG	AG	AG	GG	GG	GG	AG	GG	AG	NN	AG	AG	AG	AG	AG	AG	GG	AG	NN	GG	GG	GG
14075450|F|0-50:A>C-50:A>C	A/C	VU01	30949550	+	NA	NA	NA	NA	NA	NA	AA	AA	AA	AA	AA	CC	AA	AA	AA	AA	AA	AA	AA	AA	AA	AA	AC	CC	AA	AA	AA	AA	AA	AA	AA	AA	AC	AA	AA	AA	AA	AA	AA	CC	AA	AA	AA	AA	AA
25365085|F|0-9:A>G-9:A>G	A/G	VU01	31026100	+	NA	NA	NA	NA	NA	NA	AA	GG	AA	AA	GG	NN	AA	GG	AA	GG	GG	AA	GG	GG	AA	GG	AA	NN	AA	AG	GG	GG	GG	AG	AA	AA	GG	AA	AA	AA	AA	AA	AA	GG	AA	AA	GG	GG	GG
14084779|F|0-25:G>C-25:G>C	G/C	VU01	31047860	+	NA	NA	NA	NA	NA	NA	GG	CC	GG	GG	CC	CC	GG	CC	GG	CC	CC	GG	CC	CC	GG	CC	GC	CC	GG	GC	CC	GC	CC	GC	GG	GG	CC	GG	GG	GG	GG	GG	GG	CC	GG	GG	CC	CC	CC
35152728|F|0-51:A>G-51:A>G	A/G	VU01	31070737	+	NA	NA	NA	NA	NA	NA	AA	AA	GG	AA	AA	GG	AA	AA	GG	AA	AA	AA	AA	AA	AA	AA	AG	GG	AA	AA	AA	AA	GG	AA	GG	AA	GG	AA	AA	AA	GG	AA	AA	GG	GG	NN	AA	AA	GG
25355608|F|0-38:A>G-38:A>G	G/A	VU01	31314671	+	NA	NA	NA	NA	NA	NA	GG	GG	GG	AA	GG	GG	AA	GG	GG	GG	AA	GG	GG	GG	AA	AA	AG	GG	AA	GG	GG	GG	GG	GG	GG	AA	GG	AA	GG	AA	GG	AA	GG	GG	GG	GG	AA	GG	GG
25353910|F|0-26:A>T-26:A>T	T/A	VU01	31354828	+	NA	NA	NA	NA	NA	NA	TT	TT	TT	AA	TT	TT	AA	TT	TT	TT	AA	AA	TT	TT	AA	AA	AT	TT	AA	TT	TT	TT	TT	TT	TT	AA	TT	AA	AA	AA	TT	AA	AA	AA	TT	TT	AA	TT	TT
25353826|F|0-48:T>A-48:T>A	A/T	VU01	31399826	+	NA	NA	NA	NA	NA	NA	AA	AA	AA	AA	AA	AA	AA	AA	AA	AA	TT	AA	AA	AA	AA	TT	AT	AA	AA	AA	AA	AA	AA	AA	AA	TT	AA	AA	AA	AT	AA	AA	AA	AA	AA	AA	TT	AA	AA
14077457|F|0-19:C>G-19:C>G	C/G	VU01	31406530	+	NA	NA	NA	NA	NA	NA	CC	CC	GC	GC	CC	CC	GC	CC	GC	GC	GC	GC	GC	GC	GC	GC	GC	CC	GC	GC	GC	GC	CC	GC	CC	GC	GC	GC	CC	GC	CC	CC	CC	CC	GC	CC	GC	CC	GC
35154710|F|0-7:G>A-7:G>A	A/G	VU01	31406596	+	NA	NA	NA	NA	NA	NA	AA	AA	AG	AG	AA	AA	AG	AA	AG	AG	AG	AG	AG	AG	AG	AG	AG	AA	AG	AA	AG	AG	AA	AG	AA	AG	AA	AG	AA	AG	AA	AA	AG	AA	AG	AA	AG	AA	AG
28203389|F|0-36:A>T-36:A>T	T/A	VU01	31592592	+	NA	NA	NA	NA	NA	NA	TT	TT	TT	TT	TT	TT	TT	TT	TT	TT	TT	TT	TT	TT	TT	AA	AT	TT	TT	TT	TT	TT	TT	TT	TT	AA	TT	TT	TT	TT	TT	TT	TT	TT	TT	TT	AA	TT	TT
42215889|F|0-12:A>G-12:A>G	G	VU01	31592592	+	NA	NA	NA	NA	NA	NA	GG	GG	GG	GG	GG	GG	GG	GG	GG	GG	GG	GG	GG	GG	GG	NN	GG	GG	GG	GG	GG	GG	GG	GG	GG	NN	GG	GG	GG	GG	GG	GG	GG	GG	GG	GG	NN	GG	GG
25359488|F|0-23:A>C-23:A>C	C/A	VU01	31605709	+	NA	NA	NA	NA	NA	NA	CC	CC	CC	CC	CC	CC	CC	CC	CC	CC	CC	CC	CC	CC	CC	AA	AC	CC	CC	CC	CC	CC	CC	CC	CC	AA	CC	CC	CC	CC	CC	CC	CC	AA	CC	AC	AA	CC	CC
28497943|F|0-23:C>T-23:C>T	T/C	VU01	31709305	+	NA	NA	NA	NA	NA	NA	TT	TT	TT	TT	TT	TT	TT	TT	TT	CC	CC	TT	CC	CC	TT	CC	TT	TT	TT	CT	CC	CC	TT	CT	TT	TT	TT	TT	TT	TT	TT	TT	TT	TT	TT	TT	CC	CT	TT
14075114|F|0-54:C>T-54:C>T	C/T	VU01	31744169	+	NA	NA	NA	NA	NA	NA	CC	CC	CC	TT	CC	CC	TT	CC	CC	CC	CC	TT	CC	CC	CC	CC	CC	CC	TT	CC	CC	CT	CC	CC	CC	CC	NN	TT	TT	TT	CC	TT	TT	CC	CC	CC	CC	CC	CC
14084870|F|0-45:C>T-45:C>T	C/T	VU01	31778778	+	NA	NA	NA	NA	NA	NA	CC	CC	CC	CC	CC	CC	CC	CC	CC	TT	TT	CC	TT	TT	TT	TT	CC	CC	CC	CT	TT	TT	CC	CT	CC	CC	CC	CC	CC	CC	CC	CC	CC	CC	CC	CC	TT	CC	CC
25363010|F|0-57:T>G-57:T>G	G/T	VU01	31816767	+	NA	NA	NA	NA	NA	NA	GG	GG	TT	GG	GG	TT	GG	GG	GG	GG	GG	GG	GG	GG	GG	GG	TT	GG	GG	GG	GG	GG	GG	GG	GG	TT	GG	GG	GG	GG	GG	GG	GG	GG	GG	GG	GG	GG	GG
35152692|F|0-30:A>C-30:A>C	A/C	VU01	31821593	+	NA	NA	NA	NA	NA	NA	AA	AA	AA	AA	AA	AA	AA	NN	AA	CC	CC	AA	CC	CC	CC	CC	AA	AA	AA	AC	CC	CC	AA	AC	AA	AA	AA	AA	AA	AA	AA	AA	AA	AA	AA	AA	CC	AA	AA
28203073|F|0-11:A>T-11:A>T	T/A	VU01	31856442	+	NA	NA	NA	NA	NA	NA	TT	TT	AA	TT	TT	AA	TT	TT	AA	AA	AA	TT	AA	AA	NN	AA	NN	NN	TT	TT	AA	NN	TT	TT	TT	AA	NN	TT	TT	NN	TT	TT	TT	NN	TT	NN	AA	NN	TT
35153376|F|0-44:G>T-44:G>T	G/T	VU01	31886326	+	NA	NA	NA	NA	NA	NA	GG	GG	TT	GG	GG	TT	GG	GG	GG	GG	GG	GG	GG	GG	GG	GG	TT	GG	GG	GG	GG	GG	GG	GG	GG	NN	GG	GG	GG	GG	GG	GG	GG	NN	GG	NN	GT	NN	GG
28203101|F|0-46:G>A-46:G>A	G/A	VU01	31887323	+	NA	NA	NA	NA	NA	NA	GG	GG	AA	GG	GG	AA	GG	GG	GG	GG	GG	GG	GG	GG	GG	GG	AA	GG	GG	GG	GG	GG	GG	GG	GG	AA	GG	GG	GG	GG	GG	GG	GG	GG	GG	NN	GG	GG	GG
25352846|F|0-31:T>C-31:T>C	T/C	VU01	31909754	+	NA	NA	NA	NA	NA	NA	TT	TT	TT	CC	TT	TT	CC	TT	TT	TT	TT	CC	TT	TT	TT	TT	TT	TT	CC	TT	TT	TT	TT	TT	TT	TT	TT	CC	CC	CC	TT	CC	CC	TT	TT	TT	TT	TT	TT
35153073|F|0-57:T>C-57:T>C	T/C	VU01	31909820	+	NA	NA	NA	NA	NA	NA	TT	TT	TT	CC	TT	TT	CC	TT	TT	TT	TT	CC	TT	TT	TT	TT	TT	TT	CC	TT	TT	TT	TT	TT	TT	TT	TT	CC	CC	CC	TT	CC	CC	TT	TT	NN	TT	NN	TT
28203119|F|0-52:C>T-52:C>T	T/C	VU01	31918049	+	NA	NA	NA	NA	NA	NA	TT	TT	TT	CC	TT	TT	CC	TT	TT	TT	TT	CC	TT	TT	TT	TT	TT	TT	CC	TT	TT	TT	TT	TT	TT	TT	TT	CC	CC	CT	TT	CC	CC	TT	TT	TT	TT	TT	TT
28202915|F|0-30:G>C-30:G>C	C/G	VU01	31918115	+	NA	NA	NA	NA	NA	NA	CC	CC	CC	GG	CC	CC	GG	CC	CC	CC	CC	GG	CC	CC	CC	CC	CC	CC	GG	CC	CC	CC	CC	NN	NN	CC	CC	GG	GG	GG	CC	GG	GG	NN	CC	CC	CC	NN	NN
14077463|F|0-61:T>A-61:T>A	T/A	VU01	31925530	+	NA	NA	NA	NA	NA	NA	TT	TT	AA	TT	TT	AA	TT	TT	AA	TT	TT	TT	TT	TT	TT	TT	AA	TT	TT	TT	TT	AT	TT	AT	TT	AA	TT	TT	TT	TT	TT	TT	TT	AA	TT	TT	TT	TT	TT
14077387|F|0-59:C>A-59:C>A	A/C	VU01	32024529	+	NA	NA	NA	NA	NA	NA	AA	AA	CC	CC	AA	CC	AC	AA	CC	AA	AA	CC	AA	AA	AA	AA	CC	AA	CC	AA	AA	AA	AA	AC	AA	CC	AA	CC	CC	AC	AA	CC	CC	CC	AA	AA	AA	AA	AA
42215504|F|0-47:G>A-47:G>A	G/A	VU01	32140162	+	NA	NA	NA	NA	NA	NA	GG	GG	AA	GG	GG	GG	GG	GG	GG	GG	GG	GG	GG	GG	GG	GG	AG	GG	GG	GG	GG	GG	GG	GG	GG	AA	GG	GG	GG	GG	GG	GG	AG	GG	GG	GG	GG	GG	GG
14084756|F|0-29:C>A-29:C>A	C/A	VU01	32242990	+	NA	NA	NA	NA	NA	NA	CC	AC	CC	CC	AC	CC	CC	CC	AC	AA	AA	CC	AA	CC	AA	AA	CC	CC	CC	AC	AA	AA	CC	CC	CC	CC	CC	CC	CC	AC	CC	CC	CC	AA	CC	CC	AA	CC	CC
14081598|F|0-17:C>T-17:C>T	C/T	VU01	32243056	+	NA	NA	NA	NA	NA	NA	CC	CC	CC	CC	CC	CC	CC	CC	CT	CC	CC	CC	CC	CC	CC	CC	CC	CC	CC	CC	CC	CC	CC	CC	CC	CC	CC	CC	CC	CC	CC	CC	CC	CC	CC	NN	CC	CC	CC
35153078|F|0-32:T>A-32:T>A	T/A	VU01	32255026	+	NA	NA	NA	NA	NA	NA	TT	TT	AA	TT	TT	AA	TT	TT	TT	TT	TT	TT	TT	TT	TT	TT	AA	TT	TT	TT	TT	TT	TT	TT	TT	AA	TT	TT	TT	TT	NN	TT	NN	TT	TT	TT	TT	TT	NN
35153308|F|0-7:T>C-7:T>C	C/T	VU01	32533145	+	NA	NA	NA	NA	NA	NA	CC	CC	TT	CC	CC	TT	CC	CC	CC	CC	CC	CC	CC	TT	TT	CC	TT	CC	CC	CC	CC	CC	CC	TT	CC	TT	CC	CC	CC	CC	CC	CC	CC	CC	CC	CC	CC	CC	CC
35153818|F|0-62:A>C-62:A>C	A/C	VU01	32649988	+	NA	NA	NA	NA	NA	NA	AA	AA	CC	AA	AA	CC	AA	AA	AA	AA	AA	AA	AA	CC	CC	AA	CC	AA	AA	AA	AA	AA	AA	AC	AA	NN	AA	AA	AA	AA	AA	AA	AA	AA	AA	AA	AA	NN	AA
35153745|F|0-63:T>C-63:T>C	C/T	VU01	33176400	+	NA	NA	NA	NA	NA	NA	CC	TT	CC	CC	TT	CC	CT	TT	TT	CC	CC	CC	CC	CC	CC	CC	CC	TT	CC	CT	NN	CC	NN	CT	CC	CC	NN	CC	CC	CC	TT	CC	CC	NN	TT	TT	CC	TT	TT
28497749|F|0-35:G>A-35:G>A	G/A	VU01	33208847	+	NA	NA	NA	NA	NA	NA	GG	GG	GG	GG	GG	GG	GG	GG	GG	GG	GG	AA	GG	GG	GG	GG	GG	GG	GG	GG	GG	GG	GG	GG	GG	GG	GG	GG	GG	GG	GG	GG	AA	GG	GG	GG	GG	GG	GG
14075809|F|0-12:C>T-12:C>T	T/C	VU01	33249713	+	NA	NA	NA	NA	NA	NA	NN	CC	TT	TT	NN	TT	TT	CC	CC	TT	CC	TT	TT	TT	CC	CC	TT	CC	TT	CC	TT	CT	NN	CT	NN	TT	CC	TT	TT	TT	CC	TT	TT	CC	CC	CC	TT	TT	CC
14076858|F|0-60:G>C-60:G>C	G/C	VU01	33344665	+	NA	NA	NA	NA	NA	NA	GG	GG	GG	GG	GG	GG	GG	GG	GG	GG	GG	GG	GG	GG	GG	GG	GG	GG	GG	GG	GG	GG	GG	GG	GG	GG	GG	GG	GG	GG	GG	GG	GG	GG	GG	GG	GG	GG	GG
14073909|F|0-51:C>G-51:C>G	G/C	VU01	33688933	+	NA	NA	NA	NA	NA	NA	CC	CC	GG	GG	CC	GG	GG	CC	CC	GG	GG	CC	GG	GG	CC	GG	GG	CC	GG	GC	GG	GG	CC	GC	CC	GG	CC	GG	GG	GG	CC	GG	CC	CC	CC	CC	GG	CC	CC
35153926|F|0-63:G>A-63:G>A	A/G	VU01	33689191	+	NA	NA	NA	NA	NA	NA	GG	GG	AA	AA	GG	AA	AA	GG	GG	AA	AA	GG	AA	AA	GG	AA	AA	GG	AA	AG	AA	AA	GG	AG	GG	AA	GG	AA	AA	AA	GG	AA	GG	GG	GG	NN	AA	NN	GG
35153509|F|0-50:T>C-50:T>C	T/C	VU01	33716883	+	NA	NA	NA	NA	NA	NA	TT	TT	NN	CC	TT	CC	CC	TT	TT	CC	CC	TT	CC	CC	TT	CC	CC	TT	CC	CC	CC	CC	TT	CC	TT	CC	TT	CC	CC	CC	TT	NN	NN	TT	TT	NN	CC	NN	TT
28498101|F|0-21:A>G-21:A>G	G/A	VU01	33807286	+	NA	NA	NA	NA	NA	NA	GG	AG	GG	GG	AG	GG	GG	AG	GG	GG	AA	GG	GG	GG	GG	GG	GG	AG	GG	AG	GG	GG	AG	AG	GG	AG	AG	GG	GG	GG	AG	GG	GG	AG	AG	GG	GG	GG	AG
14074316|F|0-55:T>C-55:T>C	T/C	VU01	33868573	+	NA	NA	NA	NA	NA	NA	CC	CC	TT	TT	CC	TT	TT	CC	CT	TT	TT	TT	TT	CC	CC	TT	TT	CC	TT	CT	TT	CT	CC	CT	CC	TT	CC	TT	TT	TT	CC	TT	TT	CC	CC	CC	TT	CC	CC
14082748|F|0-52:T>C-52:T>C	C/T	VU01	33868639	+	NA	NA	NA	NA	NA	NA	TT	TT	CC	CC	TT	CC	CC	TT	TT	CC	CC	CC	CC	TT	TT	CC	CC	TT	CT	CT	CC	CT	TT	CT	TT	CC	TT	CC	CC	CC	TT	CC	CC	TT	TT	TT	CC	TT	TT
25363211|F|0-35:G>C-35:G>C	C/G	VU01	34015040	+	NA	NA	NA	NA	NA	NA	CC	CC	CC	CC	CC	CC	CC	CC	CC	CC	CC	CC	CC	CC	CC	CC	CC	CC	CC	CC	CC	CC	CC	CC	CC	CC	CC	CC	CC	CC	CC	CC	CC	CC	CC	CC	CC	GG	CC
35153168|F|0-11:C>T-11:C>T	C/T	VU01	34126605	+	NA	NA	NA	NA	NA	NA	TT	CC	TT	CC	CC	CC	CC	CC	CC	CC	CC	CC	CC	CC	TT	CC	CT	TT	CC	CC	CC	CC	CC	NN	TT	CC	CC	CC	CC	CC	CC	CC	CC	CC	TT	TT	CC	CC	CC
35153929|F|0-7:T>C-7:T>C	C/T	VU01	34149177	+	NA	NA	NA	NA	NA	NA	TT	NN	TT	CC	TT	CC	CC	TT	CC	CC	CC	NN	CC	CC	TT	CC	TT	NN	CC	NN	CC	NN	TT	NN	TT	CC	CC	CC	CC	CC	CC	CC	CC	CC	TT	NN	CC	CC	TT
14077504|F|0-49:G>T-49:G>T	G/T	VU01	34187749	+	NA	NA	NA	NA	NA	NA	TT	TT	TT	GG	TT	GG	GG	TT	GG	GG	GG	GG	GG	GG	TT	GG	GT	GG	GG	GT	GG	GG	TT	TT	GG	GG	GT	GG	GG	GG	GT	GG	GG	GG	GT	TT	GG	GG	GG
35153952|F|0-45:C>T-45:C>T	T/C	VU01	34198742	+	NA	NA	NA	NA	NA	NA	CC	CC	CC	TT	CC	TT	NN	CC	TT	TT	TT	TT	TT	TT	CC	TT	CT	TT	TT	CT	TT	NN	CC	CC	NN	TT	CT	CC	TT	TT	CC	TT	TT	TT	TT	NN	TT	TT	NN
14082941|F|0-38:A>G-38:A>G	A/G	VU01	34212312	+	NA	NA	NA	NA	NA	NA	GG	GG	GG	AA	GG	AA	AA	NN	AG	AA	AA	AA	AA	AA	GG	AA	AG	AA	AA	AG	AA	AA	GG	GG	AA	AA	AG	AA	AA	AA	GG	AA	NN	AG	AG	NN	AG	AA	AA
14082942|F|0-59:A>G-59:A>G	A/G	VU01	34212312	+	NA	NA	NA	NA	NA	NA	AA	AA	AA	AG	AA	AG	AG	AA	AG	AG	AG	AG	AG	AG	AA	AG	AG	AG	AG	AG	AG	AG	AA	AA	AG	AG	AG	AG	AG	AG	AA	GG	AA	AG	AG	NN	AG	AG	AG
14073590|F|0-55:G>T-55:G>T	G/T	VU01	34218610	+	NA	NA	NA	NA	NA	NA	TT	TT	TT	GG	TT	GG	GG	TT	TT	GG	GG	GG	GG	GG	TT	GG	GT	GG	GG	GT	GG	GG	TT	TT	GG	GG	GG	GG	GG	GG	TT	GG	GG	GG	GG	NN	GG	GG	GG
14082488|F|0-9:A>T-9:A>T	A/T	VU01	34241747	+	NA	NA	NA	NA	NA	NA	TT	AT	TT	AA	TT	AA	AA	TT	TT	AA	AA	AA	AA	AA	TT	AA	AT	AA	AA	AT	AA	AA	TT	TT	AA	AA	AT	AA	AA	AA	TT	AA	AA	AA	AA	TT	AA	AA	AA
25354903|F|0-34:A>C-34:A>C	A/C	VU01	34310230	+	NA	NA	NA	NA	NA	NA	AA	AA	AA	AA	AA	AA	AA	AA	AA	AA	AA	AA	AA	AA	AA	AA	AA	AA	AA	AA	AA	AA	AA	AA	AA	AA	AA	AA	AA	AA	AA	AA	AA	AA	AA	AA	AA	AA	AA
14074605|F|0-46:T>C-46:T>C	T/C	VU01	34310296	+	NA	NA	NA	NA	NA	NA	TT	CC	CC	TT	TT	CC	TT	TT	TT	TT	TT	TT	TT	TT	CC	TT	CT	TT	TT	TT	TT	TT	TT	CT	TT	TT	TT	TT	TT	TT	TT	TT	TT	TT	TT	TT	TT	TT	TT
100047237|F|0-10:G>A-10:G>A	G	VU01	34422048	+	NA	NA	NA	NA	NA	NA	GG	GG	GG	GG	GG	GG	GG	GG	GG	GG	GG	GG	GG	GG	GG	GG	GG	GG	GG	GG	GG	GG	GG	GG	GG	GG	GG	GG	GG	GG	GG	GG	GG	NN	GG	GG	GG	GG	GG
35154034|F|0-41:T>A-41:T>A	A/T	VU01	34432524	+	NA	NA	NA	NA	NA	NA	TT	AA	TT	NN	TT	AA	TT	AA	AA	AA	AA	TT	AA	AA	TT	AA	AT	TT	TT	NN	AA	NN	AA	AA	AA	NN	NN	NN	NN	NN	TT	TT	TT	AA	TT	NN	NN	AA	NN
14082188|F|0-16:T>A-16:T>A	A/T	VU01	34503899	+	NA	NA	NA	NA	NA	NA	AA	TT	AA	AA	TT	NN	AA	TT	TT	TT	TT	AA	AA	TT	AA	TT	AA	AA	AA	TT	TT	AT	AA	TT	AA	TT	AA	AA	AA	AA	AA	AA	AA	TT	AA	AA	AA	TT	AA
14076239|F|0-66:G>T-66:G>T	G/T	VU01	34646176	+	NA	NA	NA	NA	NA	NA	TT	GG	GG	GG	GG	GG	GG	GG	GG	GG	GG	GG	GG	GG	GG	GG	GG	TT	GG	GG	GG	GG	GG	GG	GG	GG	GT	GG	GG	GG	TT	GG	GG	TT	GG	TT	GG	GG	GG
25363258|F|0-6:T>A-6:T>A	T/A	VU01	34655485	+	NA	NA	NA	NA	NA	NA	NN	AA	TT	TT	AA	AA	TT	AA	TT	TT	TT	TT	TT	TT	TT	TT	TT	NN	TT	AT	TT	AT	AA	AT	AA	TT	TT	TT	AA	TT	NN	AA	TT	NN	TT	NN	TT	AA	TT
14087057|F|0-27:G>A-27:G>A	G/A	VU01	34661316	+	NA	NA	NA	NA	NA	NA	NN	AA	GG	GG	AA	AA	GG	AA	GG	GG	GG	GG	GG	GG	GG	GG	GG	NN	GG	AG	GG	GG	AA	AG	AA	GG	GG	GG	AA	GG	NN	AA	AG	NN	GG	NN	GG	AA	GG
25366426|F|0-63:A>T-63:A>T	A/T	VU01	34661316	+	NA	NA	NA	NA	NA	NA	AA	AA	AT	AT	AA	AA	AT	AA	AT	AT	AT	AT	AT	AT	AT	AT	AT	AA	AT	AT	AT	AT	AA	AT	AA	AT	AT	AT	AA	AT	AA	AA	AT	AA	AT	NN	AT	AA	AT
14081594|F|0-34:A>G-34:A>G	A/G	VU01	34668318	+	NA	NA	NA	NA	NA	NA	GG	GG	AA	AA	GG	GG	AA	GG	AA	AA	AA	AA	AA	AA	AA	AA	AA	GG	AG	AG	AA	AG	GG	AG	GG	AA	AG	AA	GG	AA	GG	GG	AA	GG	AA	GG	AA	GG	AA
14081594|F|0-68:A>G-68:A>G	A/G	VU01	34668318	+	NA	NA	NA	NA	NA	NA	NN	GG	AA	AA	GG	GG	AA	GG	AG	AA	AA	AA	AA	AA	AA	AA	AA	NN	AA	AA	AA	AA	GG	AG	GG	AA	AA	AA	NN	AA	NN	GG	AA	NN	AA	NN	AA	GG	AA
14083126|F|0-58:A>T-58:A>T	A/T	VU01	34669333	+	NA	NA	NA	NA	NA	NA	TT	TT	AA	AA	TT	TT	AA	TT	AT	AA	AA	AA	AA	AA	AA	AA	AA	TT	AA	AT	AA	AT	TT	AT	TT	AA	AT	AA	TT	AA	TT	TT	AA	TT	AA	TT	AA	TT	AA
14085467|F|0-31:A>G-31:A>G	A/G	VU01	34669624	+	NA	NA	NA	NA	NA	NA	GG	GG	AA	AA	GG	GG	AA	GG	AA	AA	AA	AA	AA	AA	AA	AA	AA	GG	AA	AG	AA	AA	GG	AG	GG	AA	AG	AA	GG	AA	GG	GG	AG	GG	AA	GG	AA	GG	AA
14076525|F|0-31:A>G-31:A>G	A/G	VU01	34688974	+	NA	NA	NA	NA	NA	NA	GG	GG	AA	AA	GG	GG	AA	GG	AA	AA	AA	AA	AA	AA	AA	AA	AA	AG	AA	AG	AA	NN	GG	GG	GG	AA	AG	AA	GG	NN	GG	GG	AA	GG	AA	GG	AA	GG	AA
14086046|F|0-26:G>T-26:G>T	G/T	VU01	34856560	+	NA	NA	NA	NA	NA	NA	GG	GG	TT	GG	GG	GG	GG	GG	GG	TT	TT	GG	TT	TT	GG	TT	GT	GG	GG	GG	TT	TT	GG	GT	GG	TT	GG	GG	GG	GG	GG	GG	GG	GG	GG	TT	TT	GG	GG
28497272|F|0-32:G>A-32:G>A	G/A	VU01	34867358	+	NA	NA	NA	NA	NA	NA	GG	GG	GG	GG	GG	GG	GG	GG	GG	GG	GG	GG	GG	GG	GG	GG	GG	GG	GG	GG	GG	GG	GG	GG	GG	GG	GG	GG	GG	GG	GG	GG	GG	GG	GG	GG	GG	GG	GG
14073421|F|0-50:C>T-50:C>T	C/T	VU01	34901893	+	NA	NA	NA	NA	NA	NA	TT	CC	CC	CC	CC	CC	CC	CC	TT	CC	CC	CC	CC	CC	CC	CC	CC	CC	CC	TT	CC	CC	CC	CC	CC	CC	CC	CC	CC	CC	TT	CC	CC	CC	CC	TT	CC	CC	CC
42215783|F|0-6:G>T-6:G>T	G/T	VU01	34909589	+	NA	NA	NA	NA	NA	NA	GG	GG	GG	GG	GG	GG	GG	GG	GT	GG	GG	GG	GG	GG	GG	GG	GG	GG	GG	GG	GG	GG	GG	GG	GG	GG	GG	GG	GG	NN	GG	GG	GG	GG	GG	GG	GG	GG	GG
25358635|F|0-33:G>A-33:G>A	G/A	VU01	34924549	+	NA	NA	NA	NA	NA	NA	GG	GG	GG	GG	GG	GG	GG	GG	AA	GG	GG	GG	GG	GG	GG	GG	GG	GG	GG	GG	GG	GG	GG	GG	GG	GG	GG	GG	GG	GG	GG	GG	GG	GG	GG	GG	GG	GG	AG
14076995|F|0-23:T>A-23:T>A	A/T	VU01	35126807	+	NA	NA	NA	NA	NA	NA	TT	TT	AA	AA	TT	TT	AA	TT	TT	AA	AA	AA	AA	AA	AA	AA	AT	TT	AA	TT	AA	AA	TT	AA	TT	AA	TT	AA	AA	AA	TT	AA	AT	TT	TT	TT	AA	TT	TT
25363994|F|0-46:T>G-46:T>G	T/G	VU01	35146715	+	NA	NA	NA	NA	NA	NA	TT	TT	TT	TT	TT	GG	TT	TT	TT	TT	TT	TT	TT	TT	TT	TT	TT	TT	TT	TT	TT	TT	TT	TT	TT	TT	TT	TT	TT	TT	TT	TT	TT	TT	TT	TT	TT	TT	TT
25364131|F|0-13:A>C-13:A>C	A/C	VU01	35149525	+	NA	NA	NA	NA	NA	NA	AC	AC	AA	AA	AC	AC	AA	AC	AC	AA	AA	AA	AA	AA	AA	AA	AC	AC	AA	AC	AA	AA	AC	AC	AC	AA	AC	AA	AA	AA	AC	AA	AA	AC	AC	AC	AA	AC	AC
28497284|F|0-45:A>G-45:A>G	A/G	VU01	35149726	+	NA	NA	NA	NA	NA	NA	AG	AG	AA	AA	AG	AG	AA	AG	AG	AA	AA	AA	AA	AA	AA	AA	AG	AG	AA	AG	AA	AA	AG	AA	AG	AA	AG	AA	AA	AA	AG	AA	AG	AG	AG	NN	AA	AG	AG
28203053|F|0-10:G>A-10:G>A	G/A	VU01	35190427	+	NA	NA	NA	NA	NA	NA	AA	AA	GG	GG	AA	AA	GG	AA	AA	GG	GG	NN	GG	GG	GG	GG	AG	AA	GG	AA	GG	GG	NN	NN	AA	GG	AA	NN	NN	NN	AA	GG	NN	NN	AA	NN	GG	NN	NN
14075674|F|0-34:A>G-34:A>G	G/A	VU01	35193723	+	NA	NA	NA	NA	NA	NA	AA	AA	GG	GG	AA	GG	GG	AA	AA	GG	GG	GG	GG	GG	GG	GG	AG	AA	GG	AA	GG	AG	AA	AG	AA	GG	AA	GG	GG	AG	AA	GG	GG	AA	AA	AA	GG	AA	AA
14084997|F|0-50:A>T-50:A>T	T/A	VU01	35194226	+	NA	NA	NA	NA	NA	NA	AA	AA	TT	TT	AA	TT	TT	AA	AA	TT	TT	TT	TT	TT	TT	TT	AT	AA	TT	AA	TT	TT	AA	AT	AA	TT	AA	TT	TT	TT	AA	TT	TT	AA	AA	NN	TT	AA	AA
14084998|F|0-57:T>G-57:T>G	G/T	VU01	35194226	+	NA	NA	NA	NA	NA	NA	TT	TT	GG	GG	TT	GT	GG	TT	TT	GG	GG	GT	GG	GG	GT	GG	GT	TT	GG	NN	GG	GG	TT	GT	TT	GT	TT	GG	GT	GT	TT	GT	GT	TT	TT	TT	GG	TT	TT
14077537|F|0-11:T>C-11:T>C	T/C	VU01	35323821	+	NA	NA	NA	NA	NA	NA	TT	TT	TT	TT	TT	TT	TT	TT	TT	TT	TT	TT	TT	TT	TT	TT	TT	TT	TT	TT	TT	TT	TT	TT	TT	TT	TT	TT	NN	CT	TT	TT	TT	TT	TT	NN	TT	TT	TT
14058421|F|0-38:C>T-38:C>T	C	VU01	35360949	+	NA	NA	NA	NA	NA	NA	CC	CC	CC	CC	CC	CC	CC	CC	CC	CC	CC	CC	CC	CC	CC	CC	CC	CC	CC	CC	CC	CC	CC	CC	CC	CC	CC	CC	CC	CC	CC	CC	CC	CC	CC	CC	CC	CC	CC
14079999|F|0-13:T>C-13:T>C	T/C	VU01	35377161	+	NA	NA	NA	NA	NA	NA	TT	TT	TT	TT	TT	TT	TT	TT	TT	CC	CC	CC	CC	CC	CC	CC	TT	TT	TT	TT	CC	CT	TT	CT	TT	TT	TT	TT	TT	TT	TT	CC	CC	TT	TT	TT	TT	TT	TT
42215940|F|0-20:C>A-20:C>A	C	VU01	35416092	+	NA	NA	NA	NA	NA	NA	CC	CC	CC	NN	CC	CC	NN	CC	CC	CC	CC	CC	CC	CC	CC	CC	CC	CC	CC	CC	CC	CC	CC	CC	CC	CC	CC	NN	CC	NN	CC	CC	CC	CC	CC	CC	CC	CC	CC
14076478|F|0-50:A>T-50:A>T	A/T	VU01	35649473	+	NA	NA	NA	NA	NA	NA	AA	AA	AA	AA	AA	AA	AA	AA	AA	AA	AA	AA	AA	AA	AA	AA	AA	AA	AA	AA	AA	AA	AA	AA	AA	AA	AA	AA	AA	AA	AA	AA	AA	AA	AA	AA	AA	AA	AA
25364029|F|0-14:A>G-14:A>G	G/A	VU01	35649539	+	NA	NA	NA	NA	NA	NA	GG	GG	GG	GG	GG	AG	GG	GG	GG	GG	GG	GG	GG	GG	GG	GG	GG	GG	GG	GG	GG	GG	GG	GG	GG	GG	GG	GG	GG	GG	GG	AA	GG	GG	GG	GG	GG	GG	GG
25362953|F|0-67:C>A-67:C>A	A/C	VU01	35656409	+	NA	NA	NA	NA	NA	NA	AA	NN	CC	CC	AA	CC	CC	AA	AA	AA	AA	CC	AA	AA	AA	AA	CC	AA	CC	AA	AA	CC	AA	AA	AA	AA	NN	CC	AA	CC	AA	CC	CC	AA	AA	AA	CC	AA	AA
14056881|F|0-24:A>T-24:A>T	T/A	VU01	35848058	+	NA	NA	NA	NA	NA	NA	TT	AA	TT	TT	AA	AA	TT	AA	AA	TT	TT	TT	TT	TT	AA	TT	AT	AA	TT	AA	TT	NN	AA	AT	AA	TT	AA	TT	TT	TT	AA	TT	TT	AA	AA	AA	TT	AA	AA
14077064|F|0-27:C>A-27:C>A	A/C	VU01	35848124	+	NA	NA	NA	NA	NA	NA	AA	CC	AA	AA	CC	CC	AA	CC	CC	AA	AA	AA	AA	AA	CC	AA	AC	CC	AA	CC	AA	AC	CC	AC	CC	AA	CC	AA	AA	AA	CC	AA	AA	CC	CC	CC	AA	CC	CC
14081771|F|0-45:T>C-45:T>C	T/C	VU01	35929427	+	NA	NA	NA	NA	NA	NA	TT	CC	CC	NN	CC	CC	NN	TT	CC	TT	CC	TT	TT	TT	CC	TT	CC	CC	NN	CT	TT	TT	CC	TT	CC	CC	CT	NN	TT	NN	CC	TT	TT	CT	CC	NN	NN	CC	CC
100010834|F|0-52:C>T-52:C>T	C/T	VU01	36046851	+	NA	NA	NA	NA	NA	NA	CC	CC	CC	CC	CC	CC	CC	CC	CC	CC	CC	CC	CC	CC	TT	CC	CC	CC	CC	CC	CC	CC	CC	CC	CC	CC	CC	CC	CC	CC	CC	CC	CC	CC	CC	NN	CC	CC	CC
14073803|F|0-26:G>A-26:G>A	G/A	VU01	36167905	+	NA	NA	NA	NA	NA	NA	GG	GG	GG	GG	GG	GG	GG	GG	GG	GG	AA	GG	AA	AA	GG	AA	GG	GG	GG	GG	GG	AG	GG	GG	GG	GG	GG	GG	GG	GG	GG	GG	GG	GG	GG	GG	GG	GG	GG
14075125|F|0-31:C>G-31:C>G	G/C	VU01	36201464	+	NA	NA	NA	NA	NA	NA	GG	GG	GG	GG	GG	CC	GG	GG	GG	GG	CC	GG	CC	CC	CC	CC	GC	GG	GG	GG	GG	CC	CC	GC	NN	GG	GG	GG	GG	NN	GG	GG	GG	CC	GG	NN	GG	GG	GG
14080232|F|0-39:A>G-39:A>G	A/G	VU01	36206631	+	NA	NA	NA	NA	NA	NA	AA	AA	AA	AA	AA	GG	AA	AA	AA	AA	GG	AA	GG	GG	AA	GG	AG	AA	AA	AA	AA	AG	GG	AG	GG	AA	AA	AA	AA	AA	AA	AA	AA	GG	AA	AA	AA	AA	AA
42215553|F|0-53:G>A-53:G>A	G	VU01	36207535	+	NA	NA	NA	NA	NA	NA	GG	GG	GG	GG	GG	GG	GG	GG	GG	GG	GG	GG	GG	GG	GG	GG	GG	GG	GG	GG	GG	GG	GG	GG	GG	GG	GG	GG	NN	GG	NN	GG	GG	GG	GG	NN	GG	GG	GG
14086868|F|0-5:A>G-5:A>G	A/G	VU01	36248751	+	NA	NA	NA	NA	NA	NA	AA	AA	AA	AA	AA	GG	AA	AA	AA	AA	AA	AA	AA	AA	AA	AA	AG	AA	AA	AA	AA	AA	GG	AG	GG	AA	AA	AA	AA	AA	AA	AA	AA	GG	AA	AA	AA	AA	AA
25355334|F|0-26:A>C-26:A>C	A/C	VU01	36355433	+	NA	NA	NA	NA	NA	NA	AA	AA	AA	AA	AA	AA	AA	AA	AA	AA	AA	AA	AA	AA	AA	AA	AA	AA	AA	AA	AA	AA	AA	AA	AA	AA	AA	AA	AA	AA	AA	AA	AA	AA	AA	AA	AA	AA	AA
14074807|F|0-62:C>T-62:C>T	C/T	VU01	36386744	+	NA	NA	NA	NA	NA	NA	CC	TT	CC	CC	CC	TT	CC	CC	CC	CC	CC	CC	CC	TT	CC	CC	CT	CC	CC	CC	CC	NN	CC	CC	CC	CC	CC	CC	CC	CC	CC	CC	CC	TT	CC	NN	CC	CC	TT
14075898|F|0-61:A>G-61:A>G	A/G	VU01	36454414	+	NA	NA	NA	NA	NA	NA	AA	AA	AA	AA	AA	GG	AA	AA	AA	AA	AA	AA	AA	AA	AA	AA	AG	AA	AA	AA	AA	AA	AA	AA	AA	AA	AA	AA	AA	AA	AA	AA	AA	GG	AA	AA	AA	AA	GG
35154022|F|0-59:T>C-59:T>C	T/C	VU01	36489154	+	NA	NA	NA	NA	NA	NA	TT	TT	TT	TT	TT	CC	TT	TT	TT	TT	TT	TT	TT	TT	TT	TT	CT	CC	NN	NN	TT	NN	NN	NN	TT	NN	CC	TT	TT	TT	TT	NN	TT	NN	TT	TT	TT	NN	TT
35153206|F|0-9:G>A-9:G>A	G/A	VU01	36520127	+	NA	NA	NA	NA	NA	NA	GG	AG	GG	GG	GG	GG	GG	GG	GG	GG	GG	GG	GG	GG	GG	GG	GG	GG	GG	GG	GG	GG	GG	GG	GG	GG	GG	GG	GG	GG	GG	GG	GG	GG	GG	GG	GG	GG	GG
35152804|F|0-56:A>G-56:A>G	G/A	VU01	36587616	+	NA	NA	NA	NA	NA	NA	GG	GG	GG	GG	GG	GG	GG	GG	GG	GG	GG	GG	GG	GG	GG	GG	GG	GG	GG	GG	GG	GG	GG	GG	GG	GG	GG	GG	GG	GG	GG	GG	GG	GG	GG	GG	GG	GG	GG
35153716|F|0-58:C>T-58:C>T	C	VU01	36678568	+	NA	NA	NA	NA	NA	NA	CC	CC	CC	CC	CC	CC	CC	CC	CC	CC	CC	CC	CC	CC	CC	CC	CC	CC	CC	CC	CC	CC	CC	CC	CC	CC	CC	CC	CC	CC	CC	CC	CC	CC	CC	NN	CC	CC	CC
25363111|F|0-28:G>A-28:G>A	G/A	VU01	36755154	+	NA	NA	NA	NA	NA	NA	GG	GG	GG	GG	GG	GG	GG	GG	GG	GG	GG	GG	GG	GG	GG	GG	GG	GG	GG	GG	GG	GG	GG	AG	GG	GG	GG	GG	GG	GG	GG	GG	GG	GG	GG	GG	GG	GG	GG
25360317|F|0-5:T>G-5:T>G	T/G	VU01	36763979	+	NA	NA	NA	NA	NA	NA	TT	TT	TT	TT	TT	TT	TT	TT	TT	TT	TT	TT	TT	TT	TT	TT	TT	TT	TT	TT	TT	TT	TT	TT	TT	TT	TT	TT	TT	TT	TT	TT	TT	TT	TT	TT	TT	TT	TT
14073560|F|0-38:T>C-38:T>C	C/T	VU01	36890625	+	NA	NA	NA	NA	NA	NA	TT	TT	CC	CC	TT	CC	CC	TT	CT	CC	CC	CC	CC	CC	TT	CC	CC	TT	CC	TT	CC	CC	TT	CT	TT	CC	TT	CC	CC	NN	TT	CC	CC	TT	TT	TT	CC	CC	TT
14076526|F|0-6:C>T-6:C>T	C/T	VU01	36897612	+	NA	NA	NA	NA	NA	NA	TT	TT	CC	CC	TT	CC	CC	TT	TT	CC	CC	CC	CC	CC	TT	CC	CC	TT	CC	TT	CC	CC	TT	CT	TT	CC	TT	CC	CC	CC	TT	CC	CC	TT	TT	TT	CC	CC	TT
28497889|F|0-6:A>C-6:A>C	A/C	VU01	37058855	+	NA	NA	NA	NA	NA	NA	AA	AA	AA	AA	AA	AA	AA	AA	AC	CC	AA	AA	AA	CC	AA	AA	AA	AA	AA	AA	CC	AA	AA	AA	AA	AA	AA	AA	AA	AA	AA	AA	AA	AA	AA	AA	AA	AA	AA
25356136|F|0-28:G>T-28:G>T	T/G	VU01	37059865	+	NA	NA	NA	NA	NA	NA	TT	TT	TT	TT	TT	TT	TT	TT	TT	GG	TT	TT	TT	GG	TT	TT	TT	TT	TT	TT	GG	TT	TT	TT	TT	TT	TT	TT	TT	TT	TT	TT	TT	TT	TT	TT	TT	TT	TT
14075753|F|0-46:A>C-46:A>C	A/C	VU01	37098284	+	NA	NA	NA	NA	NA	NA	AA	AA	AA	AA	AA	AA	AA	AA	AC	CC	CC	AA	AA	CC	AA	CC	AA	AA	AA	AA	CC	NN	AA	AC	AA	AA	AA	AA	AA	AA	AA	AA	AA	NN	AA	AA	AA	AA	AA
35153386|F|0-9:G>C-9:G>C	C/G	VU01	37098678	+	NA	NA	NA	NA	NA	NA	CC	CC	CC	CC	CC	CC	CC	NN	CC	GG	GG	CC	CC	GG	CC	GG	CC	CC	CC	CC	GG	NN	CC	NN	CC	CC	NN	NN	CC	CC	CC	NN	NN	NN	CC	NN	NN	NN	CC
100010360|F|0-44:A>G-44:A>G	A/G	VU01	37131106	+	NA	NA	NA	NA	NA	NA	AA	AA	AA	AA	AA	AA	AA	AA	AA	AA	AA	AA	AA	AA	AA	AA	AA	AA	AA	AA	AA	AA	AA	AA	AA	AA	AA	AA	AA	AA	AA	AA	AA	AA	AA	AA	AA	AA	AA
14081742|F|0-60:A>T-60:A>T	T/A	VU01	37303361	+	NA	NA	NA	NA	NA	NA	AA	AA	TT	TT	AA	TT	TT	AA	AA	TT	TT	TT	TT	TT	AA	TT	TT	AA	TT	AT	TT	TT	AA	AT	AA	AA	AA	TT	TT	TT	AA	TT	TT	AA	AA	AA	TT	TT	TT
35153188|F|0-42:C>G-42:C>G	G/C	VU01	37320719	+	NA	NA	NA	NA	NA	NA	CC	CC	GG	GG	CC	GG	GG	CC	CC	GG	GG	GG	GG	GG	GG	GG	GG	CC	GG	GC	GG	GG	CC	GG	CC	GG	NN	GG	GG	GG	CC	GG	GG	CC	CC	NN	GG	GG	GG
28497796|F|0-42:T>C-42:T>C	T/C	VU01	37326444	+	NA	NA	NA	NA	NA	NA	TT	TT	TT	TT	TT	TT	TT	TT	TT	TT	TT	TT	TT	TT	NN	TT	TT	TT	TT	TT	TT	TT	TT	TT	TT	NN	TT	TT	TT	TT	TT	TT	TT	TT	TT	TT	TT	TT	TT
42215597|F|0-43:C>A-43:C>A	A/C	VU01	37327360	+	NA	NA	NA	NA	NA	NA	AA	AA	AA	AA	AA	AA	AA	AA	AA	AA	AA	AA	AA	AA	CC	AA	AA	AA	AA	AA	AA	AC	AA	AA	AA	CC	AA	AA	AA	NN	AA	AA	AA	AA	AA	NN	AA	AA	AA
25363286|F|0-24:C>G-24:C>G	C/G	VU01	37350114	+	NA	NA	NA	NA	NA	NA	CC	CC	CC	CC	CC	CC	CC	CC	CC	CC	CC	CC	CC	CC	CC	CC	CC	CC	CC	CC	CC	CC	CC	CC	NN	CC	CC	CC	CC	CC	CC	CC	CC	CC	CC	NN	CC	CC	CC
25357164|F|0-34:T>A-34:T>A	T/A	VU01	37352274	+	NA	NA	NA	NA	NA	NA	TT	TT	TT	TT	TT	TT	TT	TT	TT	TT	TT	TT	TT	TT	TT	TT	TT	TT	TT	AT	TT	TT	TT	TT	TT	TT	TT	TT	TT	TT	TT	TT	TT	TT	TT	TT	TT	TT	TT
42215381|F|0-48:G>C-48:G>C	G/C	VU01	37352429	+	NA	NA	NA	NA	NA	NA	GG	GG	GG	GG	GG	GG	GG	GG	GG	GG	GG	GG	GG	GG	GG	GG	GG	GG	GG	GG	GG	GG	GG	GG	GG	NN	GG	GG	GG	GG	GG	GG	GG	GG	GG	GG	GG	GG	GG
25365270|F|0-9:G>C-9:G>C	G/C	VU01	37352495	+	NA	NA	NA	NA	NA	NA	GG	GG	GG	GG	GG	GG	GG	GG	GG	GG	GG	GG	GG	GG	GG	GG	GG	GG	GG	GG	GG	GG	GG	GG	GG	GG	GG	GG	GG	GG	GG	GG	GG	GG	GG	GG	GG	GG	GG
35152867|F|0-7:T>A-7:T>A	T/A	VU01	37635366	+	NA	NA	NA	NA	NA	NA	TT	TT	TT	TT	TT	TT	TT	TT	TT	TT	TT	TT	TT	TT	TT	TT	TT	TT	TT	TT	TT	TT	TT	TT	TT	TT	TT	TT	TT	TT	TT	TT	TT	TT	TT	TT	TT	TT	TT
35153829|F|0-26:C>A-26:C>A	C/A	VU01	37725329	+	NA	NA	NA	NA	NA	NA	AA	AA	CC	CC	CC	CC	CC	CC	AA	CC	CC	CC	NN	CC	CC	NN	CC	AA	CC	NN	CC	NN	AA	AA	AA	CC	CC	CC	CC	CC	NN	CC	CC	CC	CC	NN	CC	NN	CC
14084818|F|0-15:T>A-15:T>A	A/T	VU01	37785172	+	NA	NA	NA	NA	NA	NA	TT	AA	AA	AA	TT	TT	AA	TT	AA	AA	AA	AA	AA	AA	NN	AA	AA	TT	AA	AT	AA	AA	AA	AA	AA	AA	TT	AA	AA	AA	AA	AA	AA	TT	TT	TT	AA	AA	TT
14084819|F|0-39:C>T-39:C>T	C/T	VU01	37785172	+	NA	NA	NA	NA	NA	NA	CC	CT	CT	CT	CC	CC	CT	CC	CT	CT	CT	CT	CT	TT	CC	CT	CT	CC	CT	CT	CT	TT	CT	CT	CT	CT	CC	CT	CT	CT	CT	CT	CT	CC	CC	CC	CT	CT	CC
14085043|F|0-51:G>A-51:G>A	A/G	VU01	37785505	+	NA	NA	NA	NA	NA	NA	GG	AA	AA	AA	GG	GG	AA	GG	AA	AA	AA	AA	AA	AA	AA	AA	AA	GG	AA	AG	AA	AA	AA	AA	AA	AA	GG	AA	AA	AA	AA	AA	AA	GG	GG	GG	AA	AA	GG
14085043|F|0-42:T>C-42:T>C	C/T	VU01	37804693	+	NA	NA	NA	NA	NA	NA	CT	CC	CC	CC	CT	CT	CC	CT	CC	CC	CC	CT	CC	CC	CC	CC	CC	CT	CC	CT	CT	CC	CC	CC	CC	CC	TT	CC	CC	CC	CC	CC	CC	CT	CT	CT	CC	CC	CT
14080034|F|0-12:A>G-12:A>G	A/G	VU01	37817547	+	NA	NA	NA	NA	NA	NA	AA	AA	AA	AA	AA	AA	AA	AA	AA	AA	GG	AA	AA	AA	AA	GG	AA	AA	AA	AG	AA	AA	AA	AA	AA	AA	AA	AA	AA	AA	AA	AA	AA	AA	AA	AA	AA	AA	AA
14074732|F|0-61:T>A-61:T>A	A/T	VU01	37862612	+	NA	NA	NA	NA	NA	NA	TT	TT	TT	TT	TT	TT	TT	TT	TT	AA	AA	AA	AA	AA	TT	AA	TT	TT	TT	AT	AA	AA	TT	AT	TT	TT	TT	TT	AA	AA	TT	AA	AA	TT	TT	TT	TT	TT	TT
35153450|F|0-47:G>A-47:G>A	G/A	VU01	37883810	+	NA	NA	NA	NA	NA	NA	GG	GG	GG	GG	GG	GG	GG	GG	GG	GG	GG	GG	GG	GG	AA	GG	GG	GG	GG	GG	GG	GG	GG	GG	GG	AA	GG	GG	GG	GG	GG	GG	GG	GG	GG	GG	GG	NN	GG
14075077|F|0-5:T>C-5:T>C	C/T	VU01	37904618	+	NA	NA	NA	NA	NA	NA	CC	TT	TT	NN	TT	TT	CC	TT	TT	CC	CC	CC	NN	CC	TT	CC	TT	CC	NN	CC	CC	CC	TT	NN	TT	TT	CC	CC	NN	CC	TT	NN	CC	TT	NN	NN	TT	NN	CC
14085936|F|0-12:A>T-12:A>T	T/A	VU01	37966118	+	NA	NA	NA	NA	NA	NA	AA	AA	TT	TT	AA	AA	TT	AA	AA	TT	TT	TT	TT	TT	TT	TT	TT	TT	TT	TT	TT	TT	AA	AT	AA	TT	AT	TT	TT	TT	AA	TT	TT	AA	TT	AA	TT	TT	AA
14073402|F|0-47:A>G-47:A>G	G/A	VU01	37968429	+	NA	NA	NA	NA	NA	NA	AA	AA	GG	GG	AA	AA	GG	AA	AG	GG	GG	GG	GG	GG	GG	GG	GG	GG	GG	GG	GG	GG	AA	AG	AA	GG	AG	GG	GG	GG	AA	GG	GG	AA	GG	AA	GG	GG	AA
25355816|F|0-31:T>C-31:T>C	T/C	VU01	37981197	+	NA	NA	NA	NA	NA	NA	TT	TT	TT	TT	TT	TT	TT	TT	TT	TT	TT	TT	TT	TT	TT	TT	TT	CC	TT	CT	TT	TT	TT	TT	TT	TT	CT	TT	TT	TT	TT	CT	TT	TT	CC	TT	TT	TT	TT
42215414|F|0-21:G>C-21:G>C	G/C	VU01	37981263	+	NA	NA	NA	NA	NA	NA	GG	GG	GG	GG	GG	GG	GG	GG	GG	GG	GG	NN	GG	GG	GG	GG	GG	CC	GG	GC	GG	GG	GG	NN	NN	GG	GG	GG	NN	GG	GG	GG	NN	GG	CC	GG	GG	NN	GG
14075296|F|0-32:T>A-32:T>A	T/A	VU01	37981513	+	NA	NA	NA	NA	NA	NA	TT	TT	TT	TT	TT	TT	TT	TT	TT	TT	TT	TT	TT	TT	TT	TT	TT	AA	TT	AT	TT	TT	TT	TT	TT	TT	AT	TT	TT	TT	TT	TT	TT	TT	AA	TT	TT	TT	TT
14073431|F|0-42:G>A-42:G>A	G/A	VU01	37981579	+	NA	NA	NA	NA	NA	NA	GG	GG	GG	GG	GG	GG	GG	GG	GG	GG	GG	GG	GG	GG	GG	GG	GG	AA	GG	AG	GG	GG	GG	GG	GG	GG	AG	GG	GG	GG	GG	GG	GG	GG	AA	NN	GG	GG	GG
14076667|F|0-43:C>T-43:C>T	C/T	VU01	38025113	+	NA	NA	NA	NA	NA	NA	CC	CC	CC	CC	CC	CC	CC	CC	CC	CC	CC	CC	CC	CC	CC	CC	CC	TT	CC	CT	CC	CC	CC	CC	CC	CC	CT	CC	CC	CC	CC	CC	CC	CC	TT	CC	CC	CC	CC
28201856|F|0-19:G>T-19:G>T	G/T	VU01	38058899	+	NA	NA	NA	NA	NA	NA	GG	GG	GG	GG	GG	TT	GG	GG	GG	GG	GG	GG	GG	GG	GG	GG	GG	GG	GG	GG	GG	GG	GG	GG	GG	GG	GG	GG	GG	GG	GG	GG	GG	GG	GG	GG	GG	GG	GG
35153239|F|0-18:G>A-18:G>A	G/A	VU01	38060695	+	NA	NA	NA	NA	NA	NA	GG	GG	GG	GG	GG	AA	GG	GG	GG	GG	GG	GG	GG	GG	GG	GG	GG	GG	GG	GG	NN	GG	GG	NN	GG	GG	GG	NN	NN	GG	GG	NN	NN	GG	NN	GG	GG	GG	GG
14075720|F|0-9:G>T-9:G>T	G/T	VU01	38060761	+	NA	NA	NA	NA	NA	NA	GG	GG	GG	GG	GG	TT	GG	GG	GG	GG	GG	GG	GG	GG	GG	GG	GG	GG	GG	GG	GG	GG	GG	GG	GG	GG	GG	GG	GG	GG	GG	GG	GG	GG	GG	GG	GG	NN	GG
14077292|F|0-27:C>T-27:C>T	C/T	VU01	38061205	+	NA	NA	NA	NA	NA	NA	CC	CC	CC	CC	CC	TT	CC	CC	CC	CC	CC	CC	CC	CC	CC	CC	CC	CC	CC	CC	CC	CC	CC	CC	CC	CC	CC	CC	CC	CC	CC	CC	CC	CC	CC	CC	CC	CC	CC
14079340|F|0-7:G>A-7:G>A	G/A	VU01	38075820	+	NA	NA	NA	NA	NA	NA	GG	GG	GG	GG	GG	GG	GG	GG	GG	GG	GG	GG	GG	GG	GG	GG	GG	AA	GG	AG	GG	GG	GG	GG	GG	GG	AG	GG	GG	GG	GG	GG	GG	GG	AA	GG	GG	GG	GG
35153022|F|0-34:A>G-34:A>G	G/A	VU01	38075874	+	NA	NA	NA	NA	NA	NA	GG	GG	GG	GG	GG	AA	GG	GG	GG	GG	GG	GG	GG	GG	GG	GG	GG	GG	GG	GG	GG	GG	GG	GG	GG	GG	GG	GG	GG	GG	GG	GG	GG	AA	GG	GG	GG	GG	GG
28497458|F|0-43:C>A-43:C>A	A/C	VU01	38076734	+	NA	NA	NA	NA	NA	NA	AA	AA	AA	AA	AA	CC	AA	AA	AA	AA	AA	AA	AA	AA	AA	AA	AA	AA	AA	AA	AA	AA	AA	AA	AA	AA	AA	AA	AA	AA	AA	AA	AA	CC	AA	NN	AA	AA	AA
14085781|F|0-40:A>G-40:A>G	A/G	VU01	38106486	+	NA	NA	NA	NA	NA	NA	NN	AA	AA	AA	AA	GG	AA	AA	AA	AA	AA	AA	AA	AA	AA	AA	AA	NN	AA	AA	AA	AA	AA	AA	AA	AA	AA	AA	AA	AA	AA	AA	AA	GG	NN	AA	AA	AA	AA
35153370|F|0-13:C>A-13:C>A	A/C	VU01	38155274	+	NA	NA	NA	NA	NA	NA	CC	AA	AA	AA	AA	CC	AA	AA	AA	AA	AA	AA	AA	AA	AA	AA	AA	CC	AA	AC	AA	NN	AA	AA	AA	NN	AC	AA	AA	AA	AA	NN	AA	CC	CC	NN	AA	AA	AA
25354211|F|0-47:T>C-47:T>C	T/C	VU01	38159943	+	NA	NA	NA	NA	NA	NA	CC	TT	TT	TT	TT	TT	TT	TT	TT	TT	TT	TT	TT	TT	TT	TT	TT	CC	TT	CT	TT	TT	TT	TT	TT	TT	CT	TT	TT	TT	TT	TT	TT	TT	CC	TT	TT	TT	TT
35154326|F|0-14:A>G-14:A>G	G/A	VU01	38240198	+	NA	NA	NA	NA	NA	NA	GG	NN	GG	GG	GG	AA	GG	GG	GG	GG	GG	GG	GG	GG	GG	GG	GG	GG	GG	GG	GG	GG	GG	GG	GG	GG	GG	GG	GG	GG	GG	GG	GG	AA	GG	GG	GG	GG	GG
25356152|F|0-48:C>G-48:C>G	C/G	VU01	38247164	+	NA	NA	NA	NA	NA	NA	CC	CC	CC	CC	CC	CC	CC	CC	CC	CC	CC	CC	CC	CC	CC	CC	CC	GG	CC	CC	CC	CC	CC	CC	CC	CC	GC	CC	CC	CC	CC	CC	CC	CC	CC	CC	CC	CC	CC
35153536|F|0-48:G>A-48:G>A	G/A	VU01	38247752	+	NA	NA	NA	NA	NA	NA	GG	GG	GG	GG	GG	GG	GG	GG	GG	GG	GG	GG	GG	GG	GG	GG	GG	AA	GG	GG	GG	GG	GG	GG	GG	GG	AG	GG	GG	GG	GG	GG	GG	GG	GG	GG	GG	GG	GG
14074133|F|0-48:A>T-48:A>T	T	VU01	38289646	+	NA	NA	NA	NA	NA	NA	TT	TT	TT	TT	TT	TT	TT	TT	TT	TT	TT	TT	TT	TT	TT	TT	TT	TT	TT	TT	TT	TT	TT	TT	TT	TT	TT	TT	TT	TT	TT	TT	TT	TT	TT	TT	TT	TT	TT
14079472|F|0-28:G>A-28:G>A	G	VU01	38297045	+	NA	NA	NA	NA	NA	NA	GG	GG	GG	GG	GG	GG	GG	GG	GG	GG	GG	GG	GG	GG	GG	GG	GG	GG	GG	GG	GG	GG	GG	GG	GG	GG	GG	GG	GG	GG	GG	GG	GG	GG	GG	GG	GG	GG	GG
35153062|F|0-18:G>A-18:G>A	A/G	VU01	38297724	+	NA	NA	NA	NA	NA	NA	AA	AA	AA	AA	AA	AA	AA	AA	AA	AA	AA	AA	AA	AA	AA	AA	AA	AA	AA	AA	AA	AA	AA	AA	AA	AA	AA	AA	AA	AA	AA	AA	AA	AA	AA	AA	AA	AA	AA
14055483|F|0-57:G>A-57:G>A	G/A	VU01	38316892	+	NA	NA	NA	NA	NA	NA	GG	GG	GG	GG	GG	GG	GG	GG	GG	GG	GG	GG	GG	GG	GG	GG	GG	GG	GG	GG	GG	GG	GG	GG	GG	GG	GG	GG	AA	GG	GG	GG	GG	GG	GG	NN	GG	GG	GG
35152632|F|0-62:C>A-62:C>A	C	VU01	38317238	+	NA	NA	NA	NA	NA	NA	CC	CC	CC	CC	CC	CC	CC	CC	CC	CC	CC	CC	CC	CC	CC	CC	CC	CC	CC	CC	CC	CC	CC	CC	CC	CC	CC	CC	CC	CC	CC	CC	CC	CC	CC	CC	CC	CC	CC
14057194|F|0-42:A>T-42:A>T	A/T	VU01	38317304	+	NA	NA	NA	NA	NA	NA	AA	AA	AA	AA	AA	AA	AA	AA	AA	AA	AA	AA	AA	AA	AA	AA	AA	AA	AA	AA	AA	AA	AA	AA	AA	AA	AA	AA	TT	AA	AA	AA	AA	AA	AA	AA	AA	AA	AA
100011929|F|0-64:T>C-64:T>C	T/C	VU01	38382917	+	NA	NA	NA	NA	NA	NA	TT	TT	TT	TT	TT	TT	TT	TT	TT	TT	TT	TT	TT	TT	TT	TT	TT	TT	TT	TT	TT	TT	TT	TT	TT	CT	TT	TT	TT	TT	TT	TT	TT	TT	TT	NN	TT	TT	TT
14082783|F|0-43:A>C-43:A>C	A/C	VU01	38623913	+	NA	NA	NA	NA	NA	NA	AA	AA	CC	CC	AA	AA	CC	AA	AA	AA	AA	AA	AA	AA	CC	AA	AA	AA	CC	AA	AA	AA	AA	AA	AA	AA	AA	CC	CC	AC	AA	AA	AA	AA	AA	AA	CC	AA	AA
14078307|F|0-29:C>A-29:C>A	A/C	VU01	38658899	+	NA	NA	NA	NA	NA	NA	AA	AA	AA	AA	AA	CC	AA	AA	AA	AA	AA	AA	AA	AA	AA	NN	AA	AA	AA	AA	AA	AA	AA	AA	AA	AA	AA	AA	NN	NN	NN	AA	AA	NN	AA	NN	AA	AA	AA
14076791|F|0-15:G>A-15:G>A	G/A	VU01	38669457	+	NA	NA	NA	NA	NA	NA	GG	GG	GG	GG	GG	AA	GG	GG	GG	GG	GG	GG	GG	GG	GG	GG	GG	GG	GG	GG	GG	GG	GG	GG	GG	GG	GG	GG	GG	GG	GG	GG	GG	GG	GG	GG	GG	GG	GG
14076192|F|0-29:G>T-29:G>T	G/T	VU01	38680747	+	NA	NA	NA	NA	NA	NA	GG	GG	GG	GG	GG	TT	GG	GG	GG	GG	GG	GG	GG	GG	GG	GG	GG	GG	GG	GG	GG	GG	GG	GG	GG	GG	GG	GG	GG	GG	GG	GG	GG	GG	GG	GG	GG	GG	GG
14073374|F|0-32:G>C-32:G>C	G/C	VU01	38727779	+	NA	NA	NA	NA	NA	NA	GG	GG	GG	GG	GG	CC	GG	GG	GG	GG	GG	GG	GG	GG	GG	GG	GG	GG	GG	GG	GG	GG	GG	GG	GG	GG	GG	GG	GG	GG	GG	GG	GG	GG	GG	GG	GG	GG	GG
14082798|F|0-11:G>A-11:G>A	G	VU01	38740079	+	NA	NA	NA	NA	NA	NA	GG	GG	GG	GG	GG	GG	GG	GG	GG	GG	GG	GG	GG	GG	GG	GG	GG	GG	GG	GG	GG	GG	GG	GG	GG	GG	GG	GG	GG	GG	GG	GG	GG	GG	GG	GG	GG	GG	GG
14087185|F|0-22:A>T-22:A>T	T/A	VU01	38800049	+	NA	NA	NA	NA	NA	NA	TT	TT	TT	TT	TT	TT	TT	TT	TT	TT	TT	TT	TT	TT	TT	TT	TT	TT	TT	TT	TT	TT	TT	TT	TT	TT	TT	TT	TT	TT	TT	TT	TT	TT	AT	TT	TT	TT	AT
35153196|F|0-58:A>G-58:A>G	A/G	VU01	38814476	+	NA	NA	NA	NA	NA	NA	AA	AA	AA	AA	AA	GG	AA	AA	AA	AA	AA	AA	AA	AA	AA	AA	AA	AA	AA	AA	AA	AA	AA	AA	AA	AA	AA	AA	AA	AA	AA	AA	AA	AA	AA	AA	AA	AA	AA
28497317|F|0-12:C>T-12:C>T	C/T	VU01	38816477	+	NA	NA	NA	NA	NA	NA	CC	CC	CC	CC	CC	TT	CC	CC	CC	CC	CC	CC	CC	CC	CC	CC	CC	CC	CC	CC	CC	CC	CC	CC	CC	CC	CC	CC	CC	CC	CC	CC	CC	CC	CC	CC	CC	NN	CC
25355982|F|0-51:G>T-51:G>T	G/T	VU01	38817076	+	NA	NA	NA	NA	NA	NA	GG	GG	GG	GG	GG	TT	GG	GG	GG	GG	GG	GG	GG	GG	GG	GG	GG	GG	GG	GG	GG	GG	GG	GG	GG	GG	GG	GG	GG	GG	GG	GG	GG	GG	GG	NN	GG	GG	GG
35152781|F|0-32:A>T-32:A>T	A/T	VU01	38834144	+	NA	NA	NA	NA	NA	NA	AA	AA	AA	TT	AA	AA	TT	AA	AA	AA	AA	AA	AA	AA	TT	AA	AA	AA	TT	AA	AA	AA	AA	AA	AA	AA	AA	TT	AA	AA	AA	AA	AA	AA	AA	AA	AA	AA	AA
14084044|F|0-22:A>C-22:A>C	C/A	VU01	38933979	+	NA	NA	NA	NA	NA	NA	AA	AA	CC	CC	AA	AA	CC	AA	AA	CC	CC	CC	CC	CC	AA	CC	AA	AA	AC	AC	CC	CC	AA	AC	AA	AA	AA	CC	CC	CC	AA	CC	CC	AA	AA	AA	CC	AA	AA
35154500|F|0-53:T>C-53:T>C	C/T	VU01	38983485	+	NA	NA	NA	NA	NA	NA	TT	TT	CC	CC	TT	TT	NN	NN	TT	NN	CC	CC	CC	CC	CC	TT	TT	TT	CC	CT	CC	NN	TT	NN	TT	TT	TT	CC	NN	NN	TT	CC	CC	TT	NN	NN	CC	NN	TT
25364068|F|0-40:T>C-40:T>C	T/C	VU01	39051825	+	NA	NA	NA	NA	NA	NA	TT	TT	CC	TT	TT	TT	TT	TT	TT	CC	CC	CC	CC	CC	TT	CC	TT	TT	TT	CT	CC	CC	TT	TT	TT	TT	TT	TT	TT	TT	TT	TT	CC	TT	TT	TT	CC	TT	TT
28498064|F|0-7:T>C-7:T>C	T/C	VU01	39073299	+	NA	NA	NA	NA	NA	NA	TT	TT	TT	CC	TT	TT	CC	TT	TT	TT	TT	TT	TT	TT	CC	TT	TT	CC	CC	TT	TT	TT	TT	CT	TT	TT	CT	CC	CC	CC	TT	CC	TT	TT	TT	TT	TT	TT	TT
14076515|F|0-37:T>C-37:T>C	C/T	VU01	39104951	+	NA	NA	NA	NA	NA	NA	CC	CC	CC	CC	CC	CT	CC	CC	CC	CT	CT	CC	CT	CT	CT	CT	CC	CC	CT	CT	CT	CC	CC	CC	CC	CC	CC	CT	CC	CC	CC	CC	CC	CT	CT	CC	CC	CT	CT
25363839|F|0-51:C>G-51:C>G	C/G	VU01	39106476	+	NA	NA	NA	NA	NA	NA	GG	GG	CC	NN	CC	GC	NN	CC	GG	CC	CC	CC	CC	CC	CC	CC	GG	GG	CC	GC	CC	CC	CC	CC	CC	GG	CC	CC	NN	NN	GG	NN	CC	CC	GC	GG	CC	GC	GC
14079065|F|0-7:T>A-7:T>A	T/A	VU01	39106542	+	NA	NA	NA	NA	NA	NA	TT	TT	TT	TT	TT	AT	TT	TT	TT	AT	AT	TT	AT	AT	AT	AT	TT	TT	AT	AT	AT	AT	TT	TT	TT	TT	TT	AT	TT	AT	TT	TT	TT	AT	AT	TT	TT	AT	AT
35153166|F|0-9:C>A-9:C>A	A/C	VU01	39109754	+	NA	NA	NA	NA	NA	NA	AA	AC	AC	CC	AA	AA	CC	AA	AA	AA	AA	AC	AA	AA	CC	AA	AC	NN	CC	AA	AA	CC	AA	AC	AA	AC	AA	CC	CC	AC	AA	CC	AC	NN	AA	AA	AC	AA	AA
14087013|F|0-41:C>T-41:C>T	C/T	VU01	39176261	+	NA	NA	NA	NA	NA	NA	CC	TT	CC	CC	CC	TT	CC	CC	CC	CC	CC	CC	CC	CC	CC	CC	CC	CC	CC	CT	CC	CC	CC	CT	CC	CC	CC	CC	CC	CC	CC	CC	CC	CC	CC	TT	CC	CC	CC
14078922|F|0-11:A>T-11:A>T	T/A	VU01	39220162	+	NA	NA	NA	NA	NA	NA	AA	AA	TT	TT	AA	AA	TT	AA	AA	TT	TT	TT	TT	TT	TT	TT	AT	AA	TT	AT	TT	TT	AA	AT	AA	TT	AA	TT	TT	TT	AA	TT	TT	AA	AA	AA	TT	TT	AA
35152865|F|0-27:C>T-27:C>T	C/T	VU01	39355129	+	NA	NA	NA	NA	NA	NA	TT	TT	CC	CC	CC	CC	CC	CC	TT	CC	CC	CC	CC	CC	CC	CC	CC	TT	CC	CC	CC	CC	CC	CC	CC	CC	CT	CC	CC	CC	TT	CC	CC	CC	TT	TT	CC	NN	TT
14073974|F|0-61:G>A-61:G>A	A/G	VU01	39355195	+	NA	NA	NA	NA	NA	NA	GG	GG	AA	AA	AA	AA	AA	AA	GG	AA	AA	AA	AA	AA	AA	AA	AA	GG	AA	AA	AA	AA	AA	AA	AA	AA	AG	AA	AA	AA	GG	AA	AA	NN	GG	GG	AA	AA	GG
35152811|F|0-16:T>G-16:T>G	T/G	VU01	39375022	+	NA	NA	NA	NA	NA	NA	TT	TT	TT	GG	TT	TT	GG	TT	TT	TT	TT	GG	TT	TT	GG	TT	TT	TT	GG	TT	TT	NN	TT	TT	NN	TT	TT	GG	GG	GG	TT	GG	GG	TT	TT	TT	TT	TT	TT
14085454|F|0-46:G>A-46:G>A	G/A	VU01	39403202	+	NA	NA	NA	NA	NA	NA	GG	GG	AA	GG	GG	AA	GG	GG	GG	AA	AA	GG	AA	AA	GG	AA	AA	GG	GG	AA	AA	AG	GG	GG	AA	AA	GG	GG	GG	GG	GG	GG	GG	GG	GG	GG	AA	AA	GG
100011429|F|0-67:A>G-67:A>G	A/G	VU01	39545063	+	NA	NA	NA	NA	NA	NA	AA	AA	AA	AA	AA	AA	AA	AA	AA	AA	AA	AA	AA	AA	AA	AA	AA	AA	AA	AA	AA	AA	AA	AA	AA	AA	AA	AA	AA	AG	AA	AA	AA	AA	AA	NN	AA	AA	AA
28497657|F|0-35:T>C-35:T>C	C/T	VU01	39683199	+	NA	NA	NA	NA	NA	NA	CC	CC	CC	CC	CC	CC	CC	CC	CC	CC	CC	CC	CC	CC	CC	CC	CC	CC	CC	CC	CC	CC	TT	CC	CC	CC	CC	CC	CC	CC	CC	CC	CC	CC	CC	CC	CC	CC	CC
14054362|F|0-54:G>C-54:G>C	G/C	VU01	39702426	+	NA	NA	NA	NA	NA	NA	GG	GG	GG	GG	GG	GG	GG	GG	GG	GG	GG	GG	GG	GG	GG	GG	GG	GG	GG	GG	GG	GG	GG	GG	GG	GG	GG	GG	GG	GG	GG	GG	GG	GG	GG	GG	GG	GG	GG
25358467|F|0-10:T>C-10:T>C	T/C	VU01	39874332	+	NA	NA	NA	NA	NA	NA	TT	TT	TT	TT	TT	TT	TT	TT	TT	TT	TT	TT	TT	TT	TT	TT	TT	TT	TT	TT	TT	TT	TT	CT	TT	TT	TT	TT	TT	TT	TT	TT	TT	TT	TT	TT	TT	TT	TT
25355533|F|0-47:C>T-47:C>T	C/T	VU01	39874377	+	NA	NA	NA	NA	NA	NA	CC	CC	CC	CC	CC	CC	CC	CC	CC	CC	CC	CC	CC	CC	CC	CC	CC	CC	CC	CC	CC	CC	CC	CT	CC	CC	CC	CC	CC	CC	CC	CC	CC	CC	CC	CC	CC	CC	CC
14076817|F|0-63:G>A-63:G>A	G/A	VU01	39964846	+	NA	NA	NA	NA	NA	NA	AA	GG	GG	GG	GG	AA	GG	GG	GG	GG	GG	GG	GG	GG	GG	GG	AA	GG	GG	GG	GG	GG	GG	GG	AA	AA	GG	GG	GG	GG	GG	GG	GG	AA	GG	AA	GG	AA	GG
25364271|F|0-33:G>T-33:G>T	T/G	VU01	39982670	+	NA	NA	NA	NA	NA	NA	GG	TT	TT	TT	TT	TT	TT	TT	TT	TT	TT	TT	TT	TT	TT	TT	GG	TT	TT	TT	TT	TT	TT	TT	NN	GG	TT	TT	TT	TT	TT	TT	NN	TT	TT	NN	TT	NN	TT
14075499|F|0-41:C>G-41:C>G	C/G	VU01	39997990	+	NA	NA	NA	NA	NA	NA	GG	CC	CC	CC	CC	CC	CC	CC	CC	CC	CC	CC	CC	CC	CC	CC	CC	CC	CC	CC	CC	CC	CC	CC	CC	CC	CC	CC	CC	CC	CC	CC	CC	CC	CC	NN	CC	CC	CC
14073280|F|0-26:T>C-26:T>C	T/C	VU01	40024225	+	NA	NA	NA	NA	NA	NA	CC	TT	TT	TT	TT	TT	TT	TT	CT	CC	CC	TT	TT	CC	CC	CC	TT	TT	TT	TT	CC	CT	TT	CT	TT	TT	TT	TT	TT	TT	TT	TT	TT	TT	TT	TT	TT	TT	TT
100009222|F|0-60:C>T-60:C>T	C/T	VU01	40176690	+	NA	NA	NA	NA	NA	NA	CC	CC	CC	CC	CC	CC	CC	CC	CC	CC	CC	CC	CC	CC	CC	CC	CC	CC	CC	CC	CC	CC	CC	NN	CC	CC	CC	CC	CC	CC	CC	CC	CC	CC	CC	CC	CC	CC	CC
25363714|F|0-30:T>G-30:T>G	G/T	VU01	40312812	+	NA	NA	NA	NA	NA	NA	GG	GG	TT	TT	TT	NN	TT	TT	GT	GG	GG	TT	GG	GG	TT	GG	TT	GG	GG	GG	GG	GT	TT	TT	TT	TT	GG	GG	TT	TT	GG	TT	GT	GG	GG	GG	TT	TT	GG
14082896|F|0-40:G>A-40:G>A	A/G	VU01	40366156	+	NA	NA	NA	NA	NA	NA	GG	GG	AA	AA	AA	AA	AA	AA	GG	AA	AA	AA	AA	AA	AA	AA	AA	GG	AA	AG	AA	AA	AA	AA	AA	AA	AG	AA	AA	AA	GG	AA	AA	GG	GG	GG	AA	AA	GG
25352805|F|0-17:T>C-17:T>C	T/C	VU01	40490648	+	NA	NA	NA	NA	NA	NA	TT	TT	TT	TT	TT	TT	TT	TT	TT	TT	TT	TT	TT	TT	TT	TT	TT	TT	TT	TT	TT	TT	TT	TT	TT	TT	TT	TT	TT	TT	TT	TT	TT	TT	TT	TT	TT	TT	TT
44876281|F|0-26:C>G-26:C>G	C/G	VU01	40650662	+	NA	NA	NA	NA	NA	NA	CC	CC	CC	CC	CC	CC	CC	CC	CC	CC	CC	CC	CC	CC	CC	CC	CC	CC	CC	CC	CC	CC	CC	CC	CC	CC	CC	CC	CC	CC	CC	CC	CC	CC	CC	CC	CC	CC	CC
25365963|F|0-43:G>A-43:G>A	G/A	VU01	40720285	+	NA	NA	NA	NA	NA	NA	GG	GG	GG	GG	GG	AG	GG	GG	GG	AG	GG	GG	AG	AG	GG	GG	GG	GG	AG	GG	GG	AG	GG	AG	GG	GG	GG	AG	GG	AG	GG	AG	GG	GG	GG	GG	GG	GG	GG
14083772|F|0-25:G>T-25:G>T	T/G	VU01	40841513	+	NA	NA	NA	NA	NA	NA	TT	TT	TT	TT	TT	TT	TT	TT	TT	TT	TT	TT	TT	TT	TT	TT	TT	GG	TT	TT	TT	TT	TT	TT	TT	TT	GT	TT	TT	TT	GG	TT	TT	TT	TT	TT	TT	TT	GG
14054718|F|0-45:G>T-45:G>T	G/T	VU01	40921400	+	NA	NA	NA	NA	NA	NA	GG	GG	GG	GG	GG	GG	GG	GG	GG	GG	GG	GG	GG	GG	GG	GG	GG	GG	GG	GG	GG	GG	GG	GG	GG	GG	GG	GG	GG	GG	GG	GG	GG	GG	GG	GG	GG	GG	GG
14082854|F|0-45:C>G-45:C>G	G/C	VU01	40945080	+	NA	NA	NA	NA	NA	NA	GG	GG	GG	GG	GG	GG	GG	GG	GG	GG	GG	GG	GG	GG	GG	GG	GG	GG	GG	GG	GG	GG	GG	GG	GG	GG	GG	GG	GG	GG	GG	GG	GG	GG	NN	GG	GG	GG	GG
25359760|F|0-10:C>G-10:C>G	C/G	VU01	40995391	+	NA	NA	NA	NA	NA	NA	CC	CC	CC	GG	CC	CC	GG	CC	CC	CC	CC	CC	CC	CC	CC	CC	CC	CC	CC	CC	CC	CC	CC	CC	CC	CC	CC	CC	CC	CC	CC	CC	CC	CC	CC	CC	CC	CC	CC
44876324|F|0-52:C>T-52:C>T	C/T	VU01	41049828	+	NA	NA	NA	NA	NA	NA	CC	CC	CC	CC	TT	CC	CC	CC	CC	CC	CC	CC	CC	CC	CC	CC	CC	CC	CC	CC	CC	CC	CC	CC	CC	CC	CC	CC	CC	CC	CC	CC	CC	CC	CC	CC	CC	CC	CC
14076813|F|0-17:G>A-17:G>A	G/A	VU01	41216296	+	NA	NA	NA	NA	NA	NA	GG	GG	GG	GG	NN	GG	GG	GG	GG	AA	AA	GG	AA	AA	GG	AA	GG	GG	AG	AG	AA	AA	GG	GG	GG	GG	GG	AA	GG	GG	GG	GG	GG	GG	GG	GG	GG	GG	GG
14074741|F|0-17:G>C-17:G>C	G/C	VU01	41217193	+	NA	NA	NA	NA	NA	NA	GG	GG	GG	GG	GG	GG	GG	GG	GG	CC	CC	GG	CC	CC	GG	CC	GG	GG	CC	GC	CC	GG	GG	GG	GG	GG	GG	CC	GG	GG	GG	GG	GG	GG	GG	GG	GG	GG	GG
25358270|F|0-40:A>G-40:A>G	A/G	VU01	41223957	+	NA	NA	NA	NA	NA	NA	AA	AA	GG	AA	AA	AA	AA	AA	AA	AA	AA	AA	AA	AA	AA	AA	GG	AA	AA	AA	AA	AA	AA	AA	AA	AA	AA	AA	AA	AA	AA	AA	AA	AA	AA	AA	GG	GG	AA
14075867|F|0-22:A>C-22:A>C	A/C	VU01	41228069	+	NA	NA	NA	NA	NA	NA	AA	AA	AA	AA	CC	AA	AA	AA	AA	CC	CC	AA	CC	CC	AA	CC	AA	AA	CC	CC	CC	CC	AA	AA	AA	AA	AA	CC	AA	AA	AA	AA	AA	AA	AA	AA	AA	AA	AA
14080057|F|0-15:T>A-15:T>A	T/A	VU01	41230935	+	NA	NA	NA	NA	NA	NA	TT	TT	TT	TT	AA	TT	TT	TT	TT	AA	AA	TT	AA	AA	TT	AA	TT	TT	AA	AT	AA	AA	TT	TT	TT	TT	TT	AA	TT	TT	TT	TT	TT	TT	TT	TT	TT	TT	TT
14058799|F|0-23:C>T-23:C>T	C/T	VU01	41526611	+	NA	NA	NA	NA	NA	NA	NN	NN	CC	CC	NN	TT	CC	CC	CC	CC	CC	CC	CC	CC	CC	CC	CC	CC	CC	CC	CC	CC	CC	CC	CC	CC	CC	CC	CC	CC	NN	CC	CC	NN	CC	NN	CC	CC	NN
14075183|F|0-65:G>C-65:G>C	C/G	VU01	41527983	+	NA	NA	NA	NA	NA	NA	GG	GG	CC	CC	CC	CC	CC	CC	CC	CC	CC	CC	CC	CC	CC	CC	CC	CC	CC	CC	CC	CC	CC	CC	CC	CC	GC	CC	CC	CC	GG	CC	NN	GG	CC	GG	CC	CC	NN
14074615|F|0-65:A>T-65:A>T	A/T	VU01	41550484	+	NA	NA	NA	NA	NA	NA	TT	TT	AA	AA	NN	AA	AA	AA	AA	AA	AA	AA	AA	AA	AA	AA	AA	AA	AA	AA	AA	AA	AA	AA	AA	AA	AA	AA	AA	AA	TT	AA	AA	TT	AA	AA	AA	AA	TT
14082484|F|0-62:T>A-62:T>A	T/A	VU01	41556138	+	NA	NA	NA	NA	NA	NA	TT	TT	TT	TT	TT	AA	TT	TT	AA	TT	TT	TT	TT	TT	TT	TT	TT	AT	TT	TT	TT	TT	TT	TT	TT	TT	AT	TT	TT	TT	TT	TT	TT	TT	TT	TT	TT	TT	TT
14086461|F|0-5:G>A-5:G>A	G/A	VU01	41573955	+	NA	NA	NA	NA	NA	NA	AA	AA	GG	GG	AA	GG	GG	GG	GG	GG	GG	GG	GG	GG	GG	GG	GG	GG	GG	GG	GG	GG	GG	AG	GG	GG	GG	GG	GG	GG	AA	GG	GG	AA	GG	GG	GG	GG	AA
35153538|F|0-15:A>G-15:A>G	G/A	VU01	41574006	+	NA	NA	NA	NA	NA	NA	AA	AA	GG	GG	AA	GG	GG	GG	GG	GG	GG	GG	GG	GG	GG	GG	GG	GG	GG	GG	NN	GG	GG	NN	GG	GG	GG	GG	GG	GG	AA	GG	GG	NN	NN	GG	GG	NN	AA
14074496|F|0-40:A>G-40:A>G	A/G	VU01	41576884	+	NA	NA	NA	NA	NA	NA	GG	GG	AA	AA	GG	AA	AA	AA	AA	AA	AA	AA	AA	AA	AA	AA	AA	AA	AA	AA	AA	AA	AA	AG	AA	AA	AA	AA	AA	AA	GG	NN	AA	GG	AA	AA	AA	AA	GG
14077359|F|0-44:A>G-44:A>G	G/A	VU01	41596434	+	NA	NA	NA	NA	NA	NA	AA	AA	GG	GG	AA	GG	GG	GG	AA	GG	GG	GG	GG	GG	GG	GG	GG	AA	GG	AG	GG	GG	GG	AG	GG	GG	AA	GG	GG	GG	AA	GG	GG	AA	AA	AA	GG	GG	AA
14087448|F|0-57:G>A-57:G>A	G/A	VU01	41613855	+	NA	NA	NA	NA	NA	NA	AA	AA	GG	GG	AA	GG	GG	GG	GG	GG	GG	GG	GG	GG	GG	GG	GG	GG	GG	AG	GG	GG	GG	GG	GG	GG	AG	GG	GG	GG	AA	GG	GG	AA	AA	AA	GG	GG	AA
14081673|F|0-13:A>G-13:A>G	G/A	VU01	41614082	+	NA	NA	NA	NA	NA	NA	AA	AG	GG	GG	GG	GG	GG	GG	GG	GG	GG	GG	GG	GG	GG	GG	GG	NN	GG	AG	GG	GG	GG	GG	NN	GG	NN	GG	GG	GG	AA	GG	GG	AA	AA	AA	GG	GG	AA
14081673|F|0-17:C>T-17:C>T	C/T	VU01	41614082	+	NA	NA	NA	NA	NA	NA	NN	CC	CC	CC	CC	CC	CC	CC	CC	CC	CC	CC	CC	CC	CC	CC	CC	TT	CC	CC	CC	CC	CC	CT	TT	CC	TT	CC	CC	CC	NN	CC	CC	NN	NN	NN	CC	CC	NN
35153592|F|0-12:G>A-12:G>A	G/A	VU01	41614148	+	NA	NA	NA	NA	NA	NA	GG	GG	AA	AA	GG	AA	AA	AA	AA	GG	NN	AA	GG	GG	GG	GG	AA	GG	GG	GG	GG	AA	AA	NN	GG	AA	GG	GG	AA	GG	NN	NN	NN	NN	GG	NN	NN	AA	GG
14084266|F|0-31:C>T-31:C>T	T/C	VU01	41650776	+	NA	NA	NA	NA	NA	NA	CC	CC	TT	TT	TT	TT	TT	TT	TT	TT	TT	TT	TT	TT	TT	TT	TT	TT	TT	CT	TT	TT	TT	TT	TT	TT	CT	TT	TT	TT	CT	TT	TT	CC	CC	CC	TT	TT	CC
14073444|F|0-10:T>G-10:T>G	G/T	VU01	41654793	+	NA	NA	NA	NA	NA	NA	TT	TT	GG	GG	GG	GG	GG	GG	GG	GG	GG	GG	GG	GG	GG	GG	GG	GG	GG	GT	GG	GG	GG	GG	GG	GG	GT	GG	GG	GG	TT	GG	GG	TT	TT	TT	GG	GG	TT
14074952|F|0-5:C>A-5:C>A	C/A	VU01	41666742	+	NA	NA	NA	NA	NA	NA	AA	CC	AA	AA	CC	AA	AA	AA	CC	CC	CC	AA	CC	CC	CC	CC	AA	CC	CC	CC	CC	CC	AA	CC	CC	CC	CC	CC	AA	CC	CC	CC	NN	CC	CC	CC	AA	AA	CC
14076721|F|0-12:A>G-12:A>G	A/G	VU01	41694253	+	NA	NA	NA	NA	NA	NA	AA	GG	AA	AA	GG	NN	AA	AA	AA	AA	AA	AA	AA	AA	AA	AA	AA	NN	AA	AG	AA	AA	AA	AA	NN	AA	GG	AA	AA	AA	GG	AA	AA	GG	GG	GG	AA	AA	GG
14076721|F|0-27:C>T-27:C>T	C/T	VU01	41694253	+	NA	NA	NA	NA	NA	NA	CC	NN	CC	CC	NN	TT	CC	CC	CC	CC	CC	CC	CC	CC	CC	CC	CC	NN	CC	CC	CC	CC	CC	CC	NN	CC	NN	CC	CC	CC	NN	CC	CC	NN	NN	NN	CT	CC	NN
14073617|F|0-37:G>T-37:G>T	T/G	VU01	41694319	+	NA	NA	NA	NA	NA	NA	TT	GG	TT	TT	GG	TT	TT	TT	TT	TT	TT	TT	TT	TT	TT	TT	TT	NN	TT	GT	TT	TT	TT	TT	NN	TT	GG	TT	TT	TT	GG	TT	TT	GG	GG	NN	TT	TT	GG
14074136|F|0-6:C>T-6:C>T	T/C	VU01	41696084	+	NA	NA	NA	NA	NA	NA	TT	CC	TT	TT	CC	TT	TT	TT	TT	TT	TT	TT	TT	TT	TT	TT	TT	CC	TT	CT	TT	TT	TT	CT	CC	TT	CC	TT	TT	TT	CC	TT	NN	CC	CC	CC	NN	TT	CC
28498040|F|0-28:G>A-28:G>A	G/A	VU01	41750329	+	NA	NA	NA	NA	NA	NA	GG	NN	GG	GG	GG	GG	GG	AA	NN	GG	GG	GG	GG	GG	GG	GG	GG	NN	GG	GG	GG	GG	NN	GG	AA	GG	NN	GG	GG	GG	NN	GG	GG	AA	NN	NN	GG	GG	NN
14086808|F|0-62:G>A-62:G>A	G/A	VU01	41750745	+	NA	NA	NA	NA	NA	NA	NN	GG	GG	GG	GG	GG	GG	AA	NN	GG	GG	GG	GG	GG	GG	GG	GG	NN	GG	AG	GG	GG	NN	GG	AA	GG	GG	GG	GG	GG	GG	GG	GG	AA	NN	GG	GG	GG	GG
14086808|F|0-64:T>G-64:T>G	T/G	VU01	41750745	+	NA	NA	NA	NA	NA	NA	GG	TT	TT	TT	TT	TT	TT	NN	GG	TT	TT	TT	TT	TT	TT	TT	TT	GG	TT	GT	TT	TT	GG	GT	NN	TT	GT	TT	TT	TT	TT	TT	TT	NN	GG	TT	TT	TT	TT
14074766|F|0-62:A>C-62:A>C	A/C	VU01	41770453	+	NA	NA	NA	NA	NA	NA	CC	CC	AA	AA	CC	AA	AA	AA	CC	AA	AA	AA	AA	AA	AA	AA	AA	CC	AA	AC	AA	AA	CC	CC	AA	AA	CC	AA	AA	AA	CC	AA	AA	AA	CC	CC	AA	AA	CC
14082587|F|0-21:C>T-21:C>T	C/T	VU01	41824941	+	NA	NA	NA	NA	NA	NA	NN	NN	TT	CC	TT	CC	CC	CC	TT	CC	CC	CC	CC	CC	CC	CC	TT	TT	CC	CT	CC	CC	TT	CT	TT	CC	TT	CC	CC	CC	NN	CC	CC	CC	TT	NN	TT	TT	NN
14082587|F|0-35:G>C-35:G>C	G/C	VU01	41824941	+	NA	NA	NA	NA	NA	NA	CC	CC	GG	GG	NN	GG	GG	GG	GG	GG	GG	GG	GG	GG	GG	GG	CC	GG	GG	GG	GG	GG	NN	GG	NN	GG	CC	GG	GG	GG	CC	GG	GG	GG	GG	CC	GG	NN	CC
14081831|F|0-14:G>A-14:G>A	G/A	VU01	41873979	+	NA	NA	NA	NA	NA	NA	NN	NN	GG	GG	NN	GG	GG	NN	GG	GG	GG	GG	GG	GG	GG	GG	GG	GG	GG	GG	GG	GG	GG	GG	GG	GG	GG	GG	GG	GG	NN	GG	GG	NN	GG	NN	GG	GG	NN
14081831|F|0-55:C>T-55:C>T	T/C	VU01	41873979	+	NA	NA	NA	NA	NA	NA	CC	CC	CT	CT	CC	CT	CT	CC	CT	TT	CT	CT	CT	TT	TT	TT	CT	CT	CT	CT	CT	CT	CT	CT	CT	TT	CT	CT	CT	CT	CC	TT	CT	CC	CT	CC	CT	CT	CC
14087319|F|0-52:C>T-52:C>T	T/C	VU01	41910143	+	NA	NA	NA	NA	NA	NA	CC	CC	CC	TT	CC	TT	TT	TT	CC	TT	TT	TT	TT	TT	TT	TT	CC	CC	TT	CT	TT	TT	TT	CT	CC	TT	CC	TT	TT	TT	CC	TT	TT	TT	CC	CC	CT	CC	CC
14075777|F|0-56:C>A-56:C>A	A/C	VU01	41917345	+	NA	NA	NA	NA	NA	NA	CC	CC	CC	AA	CC	AA	AA	AA	CC	AA	AA	AA	AA	AA	AA	AA	CC	CC	AA	CC	AA	AA	NN	NN	CC	NN	CC	AA	AA	AA	CC	NN	AA	AA	CC	NN	NN	NN	CC
35152945|F|0-53:A>T-53:A>T	T/A	VU01	41919884	+	NA	NA	NA	NA	NA	NA	TT	TT	AA	TT	TT	TT	TT	TT	AA	TT	TT	TT	TT	TT	TT	TT	AA	AA	TT	AT	TT	NN	TT	NN	AA	TT	AA	TT	TT	NN	TT	TT	NN	TT	AA	NN	AA	NN	NN
14075015|F|0-36:T>C-36:T>C	C/T	VU01	41920741	+	NA	NA	NA	NA	NA	NA	TT	TT	TT	CC	TT	CC	CC	CC	CT	CC	CC	CC	CC	CC	CC	CC	TT	TT	CC	CT	CC	CC	CC	CT	TT	CC	TT	CC	CC	CC	TT	CC	CC	CC	TT	TT	TT	TT	TT
14078867|F|0-47:T>A-47:T>A	T/A	VU01	41926720	+	NA	NA	NA	NA	NA	NA	NN	NN	TT	TT	NN	TT	TT	TT	TT	AA	AA	TT	AA	AA	AA	AA	TT	TT	AA	AT	AA	AA	TT	AT	TT	TT	TT	AA	TT	TT	NN	AA	TT	TT	TT	TT	TT	TT	NN
25363056|F|0-21:G>A-21:G>A	G/A	VU01	41926778	+	NA	NA	NA	NA	NA	NA	NN	NN	GG	GG	NN	GG	GG	GG	GG	GG	GG	GG	GG	GG	GG	GG	GG	GG	GG	GG	GG	GG	GG	GG	GG	GG	GG	GG	GG	GG	NN	GG	GG	GG	NN	GG	GG	GG	NN
35152890|F|0-6:T>C-6:T>C	C/T	VU01	41926778	+	NA	NA	NA	NA	NA	NA	TT	TT	CT	CC	NN	CC	CC	CC	CC	CC	CC	CC	CC	CC	CC	CC	CC	CC	CC	CC	CC	CC	CC	CC	CC	CC	CT	CC	CC	CC	TT	CC	CC	CC	NN	CC	CC	CC	TT
14086655|F|0-22:G>A-22:G>A	A/G	VU01	41929328	+	NA	NA	NA	NA	NA	NA	GG	GG	GG	AA	GG	AA	AG	AA	AG	AA	AA	AA	AA	AA	AA	AA	GG	GG	AA	AG	AA	AA	AA	AG	GG	AA	GG	AA	AA	AA	GG	AA	AA	AA	GG	GG	GG	GG	GG
25355915|F|0-8:A>G-8:A>G	A/G	VU01	41939419	+	NA	NA	NA	NA	NA	NA	AA	AA	GG	AA	AA	AA	AA	AA	GG	AA	AA	AA	AA	AA	AA	AA	GG	GG	AA	AG	AA	AA	AA	AG	GG	AA	AG	AA	AA	AA	AA	AA	AA	AA	GG	GG	GG	GG	AA
14076734|F|0-67:C>T-67:C>T	C/T	VU01	41942264	+	NA	NA	NA	NA	NA	NA	TT	TT	CC	CC	NN	CC	CC	CC	CC	CC	CC	CC	CC	CC	CC	CC	CC	CC	CC	CC	CC	CC	CC	CC	CC	CC	CT	CC	CC	CC	TT	CC	CC	CC	CC	CC	CC	CC	TT
35154084|F|0-14:A>C-14:A>C	A/C	VU01	41953416	+	NA	NA	NA	NA	NA	NA	AA	AA	AA	CC	AA	CC	CC	AA	AA	AA	AA	CC	AA	AA	AA	AA	AA	AA	AA	AA	AA	NN	AA	AA	AA	AA	AA	AA	CC	CC	AA	AA	CC	AA	AA	AA	AA	AA	AA
14073684|F|0-13:G>C-13:G>C	C/G	VU01	41991332	+	NA	NA	NA	NA	NA	NA	GG	GG	CC	CC	CC	CC	CC	CC	CC	CC	CC	CC	CC	CC	CC	CC	CC	CC	CC	CC	CC	CC	CC	CC	CC	CC	GC	CC	CC	CC	GG	CC	CC	CC	CC	CC	CC	CC	GG
14074140|F|0-52:G>A-52:G>A	G/A	VU01	42007514	+	NA	NA	NA	NA	NA	NA	GG	GG	GG	GG	GG	GG	GG	GG	GG	AA	AA	GG	AA	AA	AA	AA	GG	GG	AA	AG	AA	AA	GG	AG	GG	GG	GG	AA	GG	GG	GG	AA	GG	GG	GG	NN	GG	GG	GG
14074959|F|0-31:A>T-31:A>T	T/A	VU02	100902	+	NA	NA	NA	NA	NA	NA	TT	AA	AA	TT	AA	AA	TT	AA	AA	TT	AA	TT	TT	TT	TT	TT	AA	AA	AT	AA	TT	TT	AA	AA	TT	TT	AA	TT	TT	TT	AA	TT	TT	TT	AA	AA	AA	AA	AA
42215523|F|0-35:G>C-35:G>C	C	VU02	287937	+	NA	NA	NA	NA	NA	NA	CC	CC	CC	CC	CC	CC	CC	CC	CC	CC	CC	CC	CC	CC	CC	CC	CC	CC	CC	CC	CC	CC	CC	NN	CC	NN	CC	CC	CC	CC	CC	CC	CC	CC	CC	CC	CC	NN	CC
14054640|F|0-48:T>G-48:T>G	G/T	VU02	1041935	+	NA	NA	NA	NA	NA	NA	GG	TT	TT	GG	TT	TT	GG	TT	TT	GG	TT	GG	GG	GG	GG	GG	TT	TT	GT	TT	GG	GG	TT	TT	GG	GG	TT	GG	GG	GG	TT	GG	GG	GG	TT	TT	TT	TT	TT
28497667|F|0-66:A>C-66:A>C	A/C	VU02	1045404	+	NA	NA	NA	NA	NA	NA	CC	CC	CC	AA	CC	CC	AA	CC	CC	AA	CC	AA	AA	AA	AA	AA	CC	CC	AA	CC	AA	AA	CC	CC	AA	AA	CC	AA	AA	AA	CC	AA	AA	CC	CC	CC	CC	CC	CC
35154524|F|0-6:C>G-6:C>G	G/C	VU02	1081720	+	NA	NA	NA	NA	NA	NA	CC	CC	NN	GG	CC	CC	GG	CC	CC	GG	CC	GG	GG	GG	GG	GG	CC	CC	GG	GC	GG	GG	CC	CC	GG	GG	NN	GG	GG	GG	CC	GG	GG	CC	CC	CC	NN	CC	CC
14054435|F|0-15:C>A-15:C>A	A/C	VU02	1246454	+	NA	NA	NA	NA	NA	NA	CC	CC	CC	AA	CC	CC	AA	CC	CC	AA	CC	AA	AA	AA	AA	AA	CC	CC	AA	CC	AA	AA	CC	CC	AA	AA	CC	AA	AA	AA	CC	AA	AA	CC	CC	CC	CC	CC	CC
35153148|F|0-24:G>T-24:G>T	G/T	VU02	1246520	+	NA	NA	NA	NA	NA	NA	TT	TT	TT	GG	TT	TT	GG	TT	TT	GG	TT	GG	GG	GG	GG	GG	TT	TT	GG	TT	GG	GG	TT	TT	GG	GG	TT	GG	GG	GG	TT	GG	GG	TT	TT	NN	TT	TT	TT
14060757|F|0-38:A>G-38:A>G	G/A	VU02	1501530	+	NA	NA	NA	NA	NA	NA	AA	AA	AA	GG	AA	AA	GG	AA	AA	GG	AA	GG	GG	GG	GG	GG	AA	AA	GG	AA	GG	GG	AA	AA	AA	GG	AA	GG	GG	GG	AA	GG	GG	AA	AA	AA	AA	AA	AA
35154959|F|0-49:G>A-49:G>A	A/G	VU02	1502980	+	NA	NA	NA	NA	NA	NA	GG	GG	GG	AA	GG	GG	AA	GG	GG	AA	NN	AA	AA	AA	AA	AA	GG	GG	AG	GG	AA	AA	NN	GG	NN	AA	GG	AA	AA	AA	GG	AA	AA	GG	GG	GG	GG	NN	GG
28497305|F|0-42:A>C-42:A>C	A/C	VU02	1556291	+	NA	NA	NA	NA	NA	NA	CC	CC	CC	AA	CC	CC	AA	CC	CC	AA	NN	AA	AA	AA	AA	AA	CC	CC	AA	AC	AA	NN	NN	NN	NN	AA	CC	AA	NN	AA	CC	AA	AA	NN	CC	NN	CC	NN	NN
14075241|F|0-31:T>A-31:T>A	A/T	VU02	1637253	+	NA	NA	NA	NA	NA	NA	TT	TT	TT	AA	TT	TT	AA	TT	TT	AA	AA	AA	AA	AA	AA	AA	TT	TT	AA	TT	AA	AA	AA	AT	AA	AA	TT	AA	AA	AA	TT	AA	AA	AA	TT	TT	AT	AA	AA
14086734|F|0-50:A>C-50:A>C	A/C	VU02	2020007	+	NA	NA	NA	NA	NA	NA	AA	AA	AA	AA	AA	AA	AA	AA	AA	AA	AA	AA	AA	AA	AA	AA	AC	AA	AA	AA	AA	AA	AA	AA	AA	AA	AA	AA	AA	AA	AA	AA	AA	AA	AA	AA	AA	AC	AA
14086734|F|0-9:T>G-9:T>G	T/G	VU02	2020007	+	NA	NA	NA	NA	NA	NA	TT	TT	TT	GT	TT	TT	GT	TT	TT	GT	TT	GT	GT	GT	GT	GT	TT	TT	GT	TT	GT	GT	TT	TT	GT	GT	TT	GT	GT	GT	TT	GT	GT	TT	TT	TT	TT	TT	TT
14061101|F|0-6:A>G-6:A>G	G/A	VU02	2080843	+	NA	NA	NA	NA	NA	NA	AA	AA	AA	GG	AA	AA	GG	AA	AA	GG	AA	GG	GG	GG	GG	GG	AA	AA	GG	AA	GG	GG	AA	AA	AA	GG	AA	GG	GG	GG	AG	GG	GG	AA	AA	AA	AG	AA	AG
25362975|F|0-40:T>C-40:T>C	T/C	VU02	2084349	+	NA	NA	NA	NA	NA	NA	CC	CC	CC	TT	CC	CC	TT	CC	CC	TT	CC	TT	TT	TT	TT	TT	CC	CC	TT	CC	TT	TT	CC	CC	CC	TT	CC	TT	TT	TT	CC	TT	CT	CC	CC	NN	CC	CC	CC
14081688|F|0-26:C>A-26:C>A	C/A	VU02	2126505	+	NA	NA	NA	NA	NA	NA	CC	CC	CC	CC	CC	CC	CC	CC	CC	CC	AA	CC	CC	CC	CC	CC	CC	AA	CC	CC	CC	CC	AA	AC	AA	CC	CC	CC	CC	CC	CC	CC	CC	AA	CC	CC	CC	AA	AA
35152755|F|0-14:G>T-14:G>T	T/G	VU02	2148620	+	NA	NA	NA	NA	NA	NA	GG	GG	GG	TT	GG	GG	TT	GG	GG	TT	TT	TT	TT	TT	TT	TT	GG	TT	TT	GG	TT	TT	NN	GG	NN	TT	GG	TT	TT	TT	GG	TT	TT	NN	GG	GG	GG	TT	TT
35154459|F|0-18:G>A-18:G>A	G/A	VU02	2159064	+	NA	NA	NA	NA	NA	NA	GG	GG	AG	GG	GG	AG	GG	GG	AG	GG	AG	GG	GG	GG	GG	GG	AG	GG	GG	GG	GG	GG	GG	AG	GG	GG	AG	GG	GG	GG	AG	GG	GG	GG	AA	GG	AG	GG	AG
35154661|F|0-23:G>T-23:G>T	G/T	VU02	2168260	+	NA	NA	NA	NA	NA	NA	TT	TT	TT	GG	TT	TT	GG	TT	TT	GG	NN	GG	GG	GG	GG	GG	TT	NN	GG	TT	GG	GG	NN	TT	NN	GG	TT	GG	GG	GG	TT	GG	NN	NN	TT	TT	TT	NN	NN
14082812|F|0-45:G>A-45:G>A	A/G	VU02	2172881	+	NA	NA	NA	NA	NA	NA	GG	GG	GG	AA	GG	GG	AA	GG	GG	AA	AA	AA	AA	AA	AA	AA	GG	AA	AA	GG	AA	AA	AA	AG	AA	AA	GG	AA	AA	AA	GG	AA	AA	AA	GG	GG	GG	AA	AA
25356846|F|0-32:T>C-32:T>C	T/C	VU02	2216491	+	NA	NA	NA	NA	NA	NA	CC	CC	CC	TT	CC	CC	TT	CC	CC	TT	CC	TT	TT	TT	TT	TT	CC	CC	TT	CC	TT	TT	CC	CC	CC	TT	CC	TT	TT	TT	CC	TT	TT	CC	CC	CC	CC	CC	CC
28497393|F|0-64:G>A-64:G>A	G/A	VU02	2317386	+	NA	NA	NA	NA	NA	NA	NN	AA	AA	GG	NN	AA	GG	AA	AA	GG	AA	GG	GG	GG	GG	GG	AA	AA	GG	AA	GG	GG	AA	AA	AA	GG	AA	GG	GG	GG	AA	GG	GG	AA	AA	AA	AA	AA	AA
28497290|F|0-37:T>C-37:T>C	T/C	VU02	2317452	+	NA	NA	NA	NA	NA	NA	NN	CC	CC	TT	NN	CC	TT	CC	CC	TT	CC	TT	TT	TT	TT	TT	CC	CC	TT	CC	TT	NN	CC	CC	CC	TT	CC	TT	TT	TT	CC	TT	TT	CC	CC	CC	CC	CC	CC
14075174|F|0-30:A>T-30:A>T	T/A	VU02	2424447	+	NA	NA	NA	NA	NA	NA	AA	AA	AA	TT	AA	AA	TT	AA	AA	TT	NN	TT	TT	TT	TT	NN	AA	NN	AT	AA	TT	TT	NN	AA	NN	TT	AA	TT	TT	TT	AA	TT	TT	NN	AA	AA	AA	NN	NN
28202926|F|0-25:G>A-25:G>A	G/A	VU02	2426547	+	NA	NA	NA	NA	NA	NA	AA	AA	AA	GG	AA	AA	GG	AA	AA	GG	AA	GG	GG	GG	GG	GG	AA	AA	GG	AA	GG	GG	AA	AA	AA	GG	AG	GG	GG	GG	AA	GG	GG	AA	AA	AA	AA	AA	AA
28202875|F|0-32:C>G-32:C>G	G/C	VU02	2710080	+	NA	NA	NA	NA	NA	NA	CC	CC	CC	GG	CC	CC	GG	CC	CC	GG	CC	GG	GG	GG	GG	GG	CC	CC	GG	CC	GG	GG	CC	CC	CC	CC	CC	GG	NN	NN	CC	GG	GG	CC	CC	CC	CC	CC	CC
28203118|F|0-23:T>C-23:T>C	C/T	VU02	2812958	+	NA	NA	NA	NA	NA	NA	TT	TT	TT	CC	TT	TT	CC	TT	TT	CC	TT	CC	CC	CC	CC	CC	TT	TT	CC	TT	CC	CC	TT	NN	TT	TT	TT	CC	CC	CC	TT	CC	CC	TT	TT	NN	TT	TT	TT
25366253|F|0-15:C>T-15:C>T	T/C	VU02	3005019	+	NA	NA	NA	NA	NA	NA	CC	CC	CC	TT	CC	CC	TT	CC	CC	TT	CC	TT	TT	TT	TT	TT	CC	CC	TT	CC	NN	TT	CC	CC	CC	CC	CC	TT	TT	TT	CC	TT	TT	CC	CC	CC	CC	CC	CC
25364059|F|0-22:A>C-22:A>C	C/A	VU02	3468290	+	NA	NA	NA	NA	NA	NA	AA	AA	AA	CC	AA	AA	CC	AA	AA	CC	AA	CC	CC	CC	CC	CC	AA	AA	CC	AA	NN	CC	AA	AA	AA	AA	AA	CC	CC	CC	AA	CC	CC	AA	AA	AA	AA	AA	AA
14059768|F|0-6:A>G-6:A>G	G/A	VU02	3494671	+	NA	NA	NA	NA	NA	NA	AA	AA	AA	GG	AA	AA	GG	AA	AA	GG	AA	GG	GG	GG	GG	NN	AA	AA	GG	AA	NN	GG	AA	AA	AA	AA	AA	GG	GG	GG	AA	GG	GG	AA	AA	AA	AA	AA	AA
25365976|F|0-16:A>G-16:A>G	A/G	VU02	3494713	+	NA	NA	NA	NA	NA	NA	GG	GG	GG	AA	GG	GG	AA	GG	GG	AA	GG	AA	AA	AA	AA	NN	GG	GG	AA	GG	NN	AA	GG	GG	GG	GG	GG	AA	AA	AA	GG	AA	AA	GG	GG	NN	GG	GG	GG
14056327|F|0-41:C>T-41:C>T	C/T	VU02	3573205	+	NA	NA	NA	NA	NA	NA	CC	CC	CC	CC	CC	CC	CC	CC	CC	CC	CC	CC	CC	CC	CC	TT	CC	CC	CC	CC	CC	CC	CC	CC	CC	CC	CC	CC	CC	CC	CC	CC	CC	CC	CC	CC	CC	CC	CC
14084821|F|0-28:C>T-28:C>T	T/C	VU02	3608242	+	NA	NA	NA	NA	NA	NA	CC	CC	CC	TT	CC	CC	TT	CC	CC	TT	CC	TT	TT	TT	TT	TT	CC	CC	TT	CC	TT	TT	CC	CC	CC	CC	CC	TT	TT	TT	CC	TT	TT	CC	CC	CC	CC	CC	CC
14073721|F|0-57:G>C-57:G>C	C/G	VU02	3623392	+	NA	NA	NA	NA	NA	NA	GG	GG	GG	CC	GG	GG	CC	GG	GG	CC	GG	CC	CC	CC	CC	CC	GG	GG	GC	GG	CC	CC	GG	GG	GG	GG	GG	CC	CC	CC	GG	CC	CC	GG	GG	GG	GG	GG	GG
25364043|F|0-56:G>A-56:G>A	A/G	VU02	3624023	+	NA	NA	NA	NA	NA	NA	GG	GG	GG	AA	GG	GG	AG	GG	GG	AA	GG	AA	AA	AA	AA	AA	GG	GG	AA	GG	AA	AA	GG	GG	GG	GG	GG	AA	AA	AA	GG	AA	AA	GG	GG	GG	GG	GG	GG
35153810|F|0-28:C>T-28:C>T	T	VU02	4074882	+	NA	NA	NA	NA	NA	NA	TT	TT	TT	TT	TT	TT	TT	TT	TT	TT	TT	TT	TT	TT	TT	TT	TT	TT	TT	TT	TT	TT	TT	TT	TT	TT	TT	TT	TT	TT	TT	TT	TT	TT	TT	NN	TT	TT	TT
14074536|F|0-38:C>T-38:C>T	C	VU02	4136575	+	NA	NA	NA	NA	NA	NA	CC	CC	CC	CC	CC	CC	CC	CC	CC	CC	CC	CC	CC	CC	CC	CC	CC	CC	CC	CC	CC	CC	CC	CC	CC	CC	CC	CC	CC	CC	CC	CC	CC	CC	CC	CC	CC	CC	CC
14055949|F|0-38:G>T-38:G>T	G/T	VU02	4367542	+	NA	NA	NA	NA	NA	NA	GG	GG	GG	GG	GG	GG	GG	GG	GG	TT	GG	GG	TT	TT	GG	TT	GG	GG	GG	GG	GG	GT	GG	GG	GG	GG	GG	GG	TT	GG	GG	GG	GG	GG	GG	GG	GG	GG	GG
14055471|F|0-6:C>G-6:C>G	C/G	VU02	4507778	+	NA	NA	NA	NA	NA	NA	CC	CC	CC	CC	CC	CC	CC	CC	CC	CC	CC	CC	CC	CC	CC	GG	CC	CC	CC	CC	CC	CC	CC	CC	CC	CC	CC	CC	GG	CC	GC	CC	CC	CC	CC	CC	CC	CC	CC
35153342|F|0-67:A>G-67:A>G	G/A	VU02	4522674	+	NA	NA	NA	NA	NA	NA	GG	GG	GG	GG	GG	GG	GG	GG	GG	AA	GG	GG	AA	GG	GG	AA	GG	GG	GG	GG	GG	AA	GG	NN	GG	GG	GG	GG	AA	GG	GG	GG	GG	GG	GG	GG	GG	NN	GG
14057201|F|0-57:T>G-57:T>G	T/G	VU02	4633871	+	NA	NA	NA	NA	NA	NA	TT	TT	TT	TT	TT	TT	TT	TT	TT	GG	TT	TT	GG	TT	TT	GG	TT	TT	TT	TT	TT	GT	TT	TT	TT	TT	TT	TT	GG	TT	TT	TT	TT	TT	TT	TT	GT	TT	TT
100046040|F|0-38:C>G-38:C>G	G/C	VU02	4797661	+	NA	NA	NA	NA	NA	NA	GG	GG	GG	GG	GG	GG	GG	GG	GG	GG	GG	GG	GG	GG	GG	GG	GG	GG	GG	GG	GG	NN	GG	GG	GG	GG	GG	GG	GG	GG	GG	GG	GG	GG	GG	GG	GG	GG	GG
14082414|F|0-6:T>C-6:T>C	T/C	VU02	4797727	+	NA	NA	NA	NA	NA	NA	TT	TT	TT	TT	TT	TT	TT	TT	TT	TT	TT	TT	TT	TT	TT	TT	TT	TT	TT	TT	TT	TT	TT	TT	TT	TT	TT	TT	NN	TT	TT	TT	TT	TT	TT	TT	TT	TT	TT
35151492|F|0-27:C>T-27:C>T	C/T	VU02	5601971	+	NA	NA	NA	NA	NA	NA	CC	CC	CC	CC	CC	CC	CC	CC	CC	CC	CC	CC	CC	CC	CC	CC	CC	CC	CC	CC	CC	CC	CC	CC	CC	CC	CC	CC	CC	CC	CC	CC	CC	CC	CC	CC	CC	CC	CC
100010705|F|0-30:T>C-30:T>C	T/C	VU02	5693710	+	NA	NA	NA	NA	NA	NA	TT	TT	TT	TT	TT	TT	TT	TT	TT	TT	TT	TT	TT	TT	TT	TT	TT	TT	TT	TT	TT	TT	TT	TT	TT	NN	TT	TT	TT	TT	NN	TT	TT	TT	TT	TT	TT	TT	TT
25363976|F|0-27:A>G-27:A>G	A/G	VU02	5948870	+	NA	NA	NA	NA	NA	NA	AA	AA	GG	AA	AA	AA	AA	GG	AA	AA	AA	AA	AA	AA	AA	AA	AA	AA	AA	AA	AA	AA	GG	AA	GG	AA	GG	AA	AA	AA	AA	AA	AA	AG	AA	GG	GG	AA	AA
14074983|F|0-64:C>A-64:C>A	A/C	VU02	5953546	+	NA	NA	NA	NA	NA	NA	AA	AA	CC	AA	AA	AA	AA	CC	AA	AA	AA	AA	AA	AA	AA	AA	AA	AA	AA	AA	AA	AA	CC	AA	NN	AA	CC	AA	AA	AA	AA	AA	AA	AA	AA	CC	CC	AA	AA
14078833|F|0-41:C>G-41:C>G	C/G	VU02	6048950	+	NA	NA	NA	NA	NA	NA	CC	CC	GG	CC	CC	CC	CC	GG	CC	CC	CC	CC	CC	CC	CC	CC	CC	CC	CC	CC	CC	CC	GG	CC	GG	CC	GG	CC	CC	CC	CC	CC	CC	CC	CC	GG	GG	CC	CC
25363868|F|0-12:C>G-12:C>G	G/C	VU02	6100186	+	NA	NA	NA	NA	NA	NA	CC	CC	CC	GG	CC	CC	GG	GG	CC	GG	CC	GG	GG	GG	GG	GG	CC	CC	GG	CC	GG	GG	CC	CC	CC	CC	CC	GG	GG	GG	CC	GG	GG	GG	CC	CC	CC	CC	CC
25363298|F|0-31:T>C-31:T>C	T/C	VU02	6128362	+	NA	NA	NA	NA	NA	NA	CC	CC	CC	TT	CC	CC	TT	CC	CC	TT	CC	TT	TT	TT	TT	TT	CC	CC	TT	CC	TT	TT	CC	CC	CC	CC	CC	TT	TT	TT	CT	TT	TT	TT	CC	NN	CC	CC	CC
14056216|F|0-48:C>T-48:C>T	T/C	VU02	6147672	+	NA	NA	NA	NA	NA	NA	CC	CC	CC	TT	CC	CC	TT	CC	CC	TT	CC	TT	TT	TT	TT	TT	CC	CC	CT	CC	TT	TT	CC	CC	CC	CC	CC	TT	TT	TT	CC	TT	TT	TT	CC	CC	CC	CC	CC
100009333|F|0-11:G>C-11:G>C	G/C	VU02	6178961	+	NA	NA	NA	NA	NA	NA	GG	GG	GG	GG	GG	GG	GG	GG	GG	GG	GG	GG	GG	GG	GG	GG	GG	GG	GG	GG	GG	GG	GG	GG	GG	GG	GG	GG	GG	GG	GG	GG	GG	GC	GG	GG	GG	GG	GG
14056509|F|0-25:C>T-25:C>T	T/C	VU02	6320880	+	NA	NA	NA	NA	NA	NA	CC	CC	CC	TT	CC	CC	TT	CC	CC	TT	CC	TT	TT	TT	TT	TT	CC	CC	TT	CC	TT	TT	CC	CC	CC	CC	CC	TT	TT	TT	CC	TT	TT	TT	CC	CC	CC	CC	CC
14084787|F|0-43:G>T-43:G>T	G/T	VU02	6408415	+	NA	NA	NA	NA	NA	NA	GG	GG	GG	GG	GG	GG	GG	GG	GG	GG	GG	GG	GG	GG	GG	GG	GG	GG	GG	GT	GG	GG	GG	GG	GG	GG	GG	GG	GG	GG	GG	GG	GG	GG	GG	GT	GG	GG	GG
25365994|F|0-34:C>T-34:C>T	T/C	VU02	6629625	+	NA	NA	NA	NA	NA	NA	CC	CC	CC	TT	CC	CC	TT	CC	CC	TT	CC	TT	TT	TT	TT	TT	CC	CC	TT	CC	TT	TT	CC	CC	CC	CC	CC	TT	TT	TT	CC	TT	TT	CC	CC	CC	CC	CC	CC
14082184|F|0-24:T>G-24:T>G	G/T	VU02	6712962	+	NA	NA	NA	NA	NA	NA	GG	TT	GG	GG	GG	TT	GG	GG	TT	GG	TT	GG	GG	GG	GG	GG	TT	TT	GT	TT	GG	GG	GG	TT	GG	GG	GG	GG	GG	GG	TT	GG	GG	TT	TT	GG	GG	TT	TT
35153898|F|0-28:T>C-28:T>C	C/T	VU02	6931911	+	NA	NA	NA	NA	NA	NA	TT	NN	TT	CC	TT	TT	CT	NN	TT	CC	TT	CC	CC	CC	CC	CC	TT	TT	CC	TT	CC	NN	TT	NN	TT	TT	NN	CC	CC	CC	TT	CC	CC	TT	TT	NN	TT	TT	TT
14076119|F|0-43:T>C-43:T>C	C/T	VU02	6965792	+	NA	NA	NA	NA	NA	NA	TT	TT	TT	CC	TT	TT	CC	TT	TT	CC	TT	CC	CC	CC	CC	CC	TT	TT	CC	TT	CC	CC	TT	TT	TT	TT	TT	CC	CC	CC	TT	CC	CC	TT	CC	TT	TT	TT	TT
14078180|F|0-10:G>A-10:G>A	A/G	VU02	7000798	+	NA	NA	NA	NA	NA	NA	NN	GG	GG	AA	NN	GG	AA	NN	GG	AA	GG	AA	NN	AA	AA	AA	GG	GG	AA	NN	NN	NN	NN	GG	NN	NN	GG	AA	AA	AA	GG	AA	AA	GG	AA	NN	GG	GG	GG
14085253|F|0-10:G>A-10:G>A	A/G	VU02	7000805	+	NA	NA	NA	NA	NA	NA	NN	GG	GG	AA	NN	GG	AA	NN	GG	AA	GG	AA	AA	AA	AA	AA	GG	GG	AA	GG	AA	AA	NN	GG	NN	NN	NN	AA	AA	AA	GG	AA	AA	GG	AA	NN	GG	GG	GG
14084855|F|0-22:C>T-22:C>T	T/C	VU02	7053187	+	NA	NA	NA	NA	NA	NA	NN	CC	NN	TT	NN	CC	TT	NN	CC	TT	CC	NN	TT	NN	TT	TT	CC	CC	TT	NN	TT	NN	NN	CC	NN	NN	NN	TT	NN	TT	CT	TT	TT	CC	TT	NN	NN	CC	CC
14075094|F|0-38:A>G-38:A>G	G/A	VU02	7053253	+	NA	NA	NA	NA	NA	NA	AA	AA	AA	GG	AA	AA	GG	AA	AA	GG	AA	NN	GG	NN	GG	GG	AA	AA	GG	AG	GG	NN	AA	AA	AA	AA	AA	NN	NN	NN	AA	GG	GG	NN	GG	NN	AA	AA	AA
35153736|F|0-10:G>T-10:G>T	G/T	VU02	7185445	+	NA	NA	NA	NA	NA	NA	GG	GG	TT	GG	GG	GG	GG	GG	GG	GG	GG	GG	GG	GG	GG	GG	GG	GG	GG	TT	GG	NN	GG	GG	GG	GG	TT	GG	GG	GG	GG	GG	GG	GG	GG	GG	TT	GG	GG
14073480|F|0-10:A>T-10:A>T	T/A	VU02	7185511	+	NA	NA	NA	NA	NA	NA	TT	TT	AA	TT	TT	TT	TT	NN	TT	TT	TT	TT	TT	TT	TT	TT	TT	TT	TT	AA	TT	TT	TT	NN	TT	TT	AA	TT	NN	TT	TT	TT	NN	TT	NN	TT	AA	TT	TT
42215805|F|0-6:T>G-6:T>G	G/T	VU02	7271808	+	NA	NA	NA	NA	NA	NA	GG	GG	GG	GG	TT	GG	GG	GG	GG	GG	GG	GG	GG	GG	GG	GG	GG	GG	GG	GG	GG	GG	TT	GG	TT	GG	GG	GG	GG	GG	GG	GG	GG	NN	GG	NN	GG	GG	GG
25364322|F|0-7:T>C-7:T>C	T/C	VU02	7544312	+	NA	NA	NA	NA	NA	NA	TT	TT	TT	TT	TT	TT	TT	TT	TT	TT	TT	TT	TT	TT	TT	TT	TT	TT	TT	TT	TT	TT	CC	TT	CC	TT	TT	TT	TT	TT	TT	TT	TT	TT	TT	TT	TT	TT	TT
35154437|F|0-23:A>G-23:A>G	G/A	VU02	7708621	+	NA	NA	NA	NA	NA	NA	GG	GG	GG	GG	GG	NN	GG	GG	GG	GG	GG	GG	GG	GG	GG	GG	GG	GG	GG	GG	GG	GG	GG	GG	GG	NN	GG	GG	GG	GG	GG	GG	GG	AG	GG	NN	GG	AG	GG
28497934|F|0-12:T>C-12:T>C	T/C	VU02	7738012	+	NA	NA	NA	NA	NA	NA	TT	TT	CC	TT	TT	TT	TT	TT	TT	TT	TT	TT	TT	TT	TT	TT	TT	TT	TT	TT	TT	TT	CC	TT	CC	CC	CC	TT	TT	TT	TT	TT	TT	TT	TT	TT	CC	TT	TT
14059507|F|0-6:A>T-6:A>T	A/T	VU02	7968361	+	NA	NA	NA	NA	NA	NA	AA	AA	AA	AA	AA	AA	AA	AA	AA	AA	AA	AA	AA	AA	AA	AA	AA	AA	AA	AA	AA	AA	AA	AA	AA	AA	AA	AA	AA	AA	AA	AA	AA	AA	AA	AA	AA	AA	AA
14055342|F|0-6:C>T-6:C>T	C	VU02	7970345	+	NA	NA	NA	NA	NA	NA	CC	CC	CC	CC	CC	CC	CC	CC	CC	CC	CC	CC	CC	CC	CC	CC	CC	CC	CC	CC	CC	CC	CC	CC	CC	CC	CC	CC	CC	CC	CC	CC	CC	CC	CC	CC	CC	CC	CC
14088122|F|0-26:G>A-26:G>A	A/G	VU02	8183592	+	NA	NA	NA	NA	NA	NA	AA	AG	AA	AA	AA	AA	AA	AA	AG	AA	AA	AA	AA	AA	AA	AA	AA	AA	AA	AA	AA	AA	AA	AA	AA	AA	AA	AA	AA	AA	AA	AA	AA	NN	AA	AA	AA	AA	AA
35155012|F|0-66:C>A-66:C>A	A/C	VU02	8352853	+	NA	NA	NA	NA	NA	NA	AA	AA	AA	NN	AA	AA	AA	AC	AA	AA	AA	AA	AA	AA	AA	AA	AC	AA	AA	NN	AA	AA	AA	AA	AA	AC	NN	AA	AA	NN	NN	AA	NN	AA	AA	NN	AC	AA	AA
14078272|F|0-11:T>C-11:T>C	T/C	VU02	8551654	+	NA	NA	NA	NA	NA	NA	CC	NN	CT	TT	CC	TT	TT	NN	NN	TT	CC	TT	TT	TT	TT	TT	TT	CC	TT	TT	TT	TT	NN	TT	CC	NN	CC	TT	TT	TT	TT	TT	TT	NN	CC	NN	TT	TT	CC
14076060|F|0-10:C>T-10:C>T	C/T	VU02	12152758	+	NA	NA	NA	NA	NA	NA	CT	NN	CC	CC	CC	CC	CC	TT	NN	CC	NN	CC	CT	CC	CC	CC	CC	NN	CC	TT	CT	CT	CC	CT	CC	CT	CT	CC	CC	CC	CC	CC	CC	CC	NN	CT	CC	CC	NN
14074458|F|0-30:C>A-30:C>A	C/A	VU02	12153105	+	NA	NA	NA	NA	NA	NA	AC	NN	CC	CC	CC	CC	CC	AC	AA	CC	NN	CC	CC	CC	CC	CC	CC	CC	CC	AC	AC	AC	CC	AC	CC	AC	AC	CC	CC	CC	CC	CC	CC	CC	NN	AC	CC	CC	CC
100011504|F|0-11:A>G-11:A>G	G/A	VU02	12887845	+	NA	NA	NA	NA	NA	NA	AA	GG	GG	GG	AA	GG	NN	GG	GG	GG	NN	GG	GG	GG	GG	GG	GG	GG	GG	NN	GG	GG	GG	GG	NN	GG	GG	GG	GG	NN	GG	NN	GG	GG	GG	NN	GG	GG	GG
25364151|F|0-32:G>A-32:G>A	G/A	VU02	13394971	+	NA	NA	NA	NA	NA	NA	GG	GG	GG	AA	GG	GG	AA	GG	GG	GG	GG	AA	GG	GG	AA	GG	GG	GG	NN	GG	GG	AA	GG	GG	GG	GG	GG	AA	AA	AA	GG	AA	AA	GG	GG	GG	GG	GG	GG
28497443|F|0-49:T>C-49:T>C	T/C	VU02	13430406	+	NA	NA	NA	NA	NA	NA	TT	TT	TT	CC	TT	TT	CC	TT	TT	TT	TT	CC	TT	TT	CC	TT	TT	TT	CC	TT	TT	TT	TT	TT	TT	TT	TT	CC	CC	CC	TT	CC	CC	TT	TT	TT	TT	TT	TT
25357469|F|0-8:A>G-8:A>G	A/G	VU02	13941025	+	NA	NA	NA	NA	NA	NA	AA	AA	AA	AA	AA	AA	AA	AA	AA	AA	AA	AA	AA	AA	AA	AA	AA	AA	AA	AA	AA	AA	AA	AA	AA	AA	AA	AA	AA	AA	AA	AA	AA	AA	AA	AA	AA	AA	AA
35153109|F|0-22:A>T-22:A>T	A/T	VU02	13984725	+	NA	NA	NA	NA	NA	NA	AA	AA	AA	AA	AA	AA	AA	AA	AA	AA	AA	AA	AA	AA	AA	AA	AA	AA	AA	AA	AA	AA	AA	AA	AA	NN	NN	AA	AA	AA	AA	AA	AA	AA	AA	NN	AA	AA	AA
28497603|F|0-12:T>G-12:T>G	T/G	VU02	14071294	+	NA	NA	NA	NA	NA	NA	TT	TT	TT	TT	TT	TT	TT	TT	TT	TT	TT	TT	TT	TT	TT	TT	TT	TT	TT	TT	TT	GT	TT	TT	TT	TT	TT	TT	GT	GT	TT	TT	TT	TT	TT	TT	TT	TT	TT
28202013|F|0-46:C>T-46:C>T	C/T	VU02	14147596	+	NA	NA	NA	NA	NA	NA	CC	CC	CC	CC	CC	CC	CC	CC	CC	CC	CC	CC	NN	CC	CC	CC	CC	CC	CC	CC	CC	NN	CC	CC	CC	CC	CC	CC	CC	CC	CC	CC	CC	CC	CC	CC	NN	CC	CC
14073842|F|0-36:G>A-36:G>A	G/A	VU02	14226114	+	NA	NA	NA	NA	NA	NA	GG	GG	GG	GG	GG	GG	GG	GG	GG	GG	GG	GG	GG	GG	GG	GG	GG	GG	GG	GG	GG	AG	GG	GG	GG	GG	GG	GG	GG	GG	GG	GG	GG	GG	GG	GG	GG	GG	GG
35154547|F|0-39:C>T-39:C>T	C/T	VU02	14226180	+	NA	NA	NA	NA	NA	NA	CC	CC	CC	CC	CC	CC	CC	NN	CC	NN	CC	CC	CC	CC	CC	CC	CC	CC	CC	CC	CC	NN	CC	CC	NN	CC	CC	CC	NN	CC	CC	NN	CC	NN	NN	NN	NN	CC	NN
14081521|F|0-48:G>A-48:G>A	G/A	VU02	14234920	+	NA	NA	NA	NA	NA	NA	GG	GG	GG	GG	GG	GG	GG	GG	GG	NN	GG	GG	GG	GG	GG	GG	GG	GG	GG	GG	GG	AA	GG	GG	GG	GG	GG	GG	GG	GG	GG	GG	GG	GG	GG	GG	GG	GG	GG
35154547|F|0-10:C>A-10:C>A	A/C	VU02	14234986	+	NA	NA	NA	NA	NA	NA	AA	AA	AA	AA	AA	AA	AA	AA	AA	NN	AA	AA	AA	AA	NN	AA	AA	AA	NN	AA	NN	AA	NN	AA	AA	AA	NN	NN	AA	AA	AA	AA	NN	NN	AA	NN	AA	AA	NN
25355077|F|0-35:G>T-35:G>T	G/T	VU02	14277288	+	NA	NA	NA	NA	NA	NA	GG	GG	GG	GG	GG	GG	GG	GG	GG	GG	GG	GG	GG	GG	GG	GG	GG	GG	GG	GG	GG	GG	GG	GG	GG	GG	GG	GG	GG	GG	GG	GG	GG	GG	GG	GG	GG	GG	GG
25363951|F|0-13:T>G-13:T>G	T/G	VU02	14277348	+	NA	NA	NA	NA	NA	NA	TT	TT	TT	TT	TT	TT	TT	TT	TT	TT	TT	TT	TT	TT	TT	TT	TT	TT	TT	TT	TT	TT	TT	TT	TT	TT	TT	TT	TT	TT	TT	TT	TT	TT	TT	TT	TT	TT	TT
25363951|F|0-68:C>A-68:C>A	C/A	VU02	14277348	+	NA	NA	NA	NA	NA	NA	CC	CC	CC	CC	CC	CC	CC	CC	CC	CC	CC	CC	CC	CC	CC	CC	CC	CC	CC	CC	CC	CC	CC	CC	CC	CC	CC	CC	CC	CC	CC	CC	CC	CC	CC	CC	CC	CC	CC
28497281|F|0-9:C>T-9:C>T	C/T	VU02	14383662	+	NA	NA	NA	NA	NA	NA	CC	CC	CC	CC	CC	CC	CC	CC	CC	CC	CC	CC	CC	CC	CC	CC	CC	CT	CC	CC	CC	CC	CC	CC	CC	CC	CC	CC	CC	CC	CC	CC	CC	CC	CC	CC	CC	CC	CC
35154085|F|0-68:C>A-68:C>A	A/C	VU02	14461172	+	NA	NA	NA	NA	NA	NA	AA	AA	AA	AA	AA	AA	AA	CC	AA	AA	CC	AA	AA	AA	AA	AA	AA	CC	AA	AA	CC	AA	AA	NN	AA	AA	AA	AA	AA	AA	AA	NN	AA	NN	CC	AA	AA	AA	AA
14073317|F|0-48:C>G-48:C>G	G/C	VU02	14461238	+	NA	NA	NA	NA	NA	NA	GG	GG	GG	GG	GG	GG	GG	CC	GG	GG	GG	GG	GG	GG	GG	GG	GG	CC	GG	GG	CC	NN	GG	GG	GG	GG	GG	GG	GG	GG	GG	GG	GG	GG	CC	NN	GG	GG	GG
14075887|F|0-17:C>G-17:C>G	C/G	VU02	14495319	+	NA	NA	NA	NA	NA	NA	CC	CC	CC	CC	CC	CC	CC	GG	CC	CC	CC	CC	CC	CC	CC	CC	CC	GG	CC	CC	GG	CC	CC	CC	CC	CC	CC	CC	CC	CC	CC	CC	CC	CC	GG	CC	CC	CC	CC
35152648|F|0-40:G>T-40:G>T	G/T	VU02	14516381	+	NA	NA	NA	NA	NA	NA	GG	GG	GG	GG	GG	GG	GG	TT	GG	GG	GG	GG	GG	GG	GG	GG	GG	TT	GG	GG	TT	NN	GG	GG	GG	GG	GG	GG	NN	GG	GG	NN	GG	NN	TT	GG	GG	GG	NN
14055111|F|0-34:T>G-34:T>G	T/G	VU02	14559104	+	NA	NA	NA	NA	NA	NA	TT	TT	TT	TT	TT	TT	TT	NN	TT	TT	TT	TT	TT	TT	TT	TT	TT	TT	TT	TT	NN	TT	TT	TT	TT	TT	TT	TT	TT	TT	NN	TT	TT	TT	NN	NN	TT	TT	TT
14077079|F|0-14:C>A-14:C>A	C/A	VU02	14608652	+	NA	NA	NA	NA	NA	NA	CC	CC	CC	CC	CC	CC	CC	CC	CC	CC	CC	CC	CC	CC	CC	CC	CC	CC	AA	CC	CC	CC	CC	CC	CC	CC	CC	AA	CC	CC	CC	CC	CC	CC	CC	CC	CC	CC	CC
14061460|F|0-34:C>T-34:C>T	C/T	VU02	14927275	+	NA	NA	NA	NA	NA	NA	CC	CC	CC	CC	CC	CC	CC	CC	CC	CC	CC	CC	CC	CC	CC	CC	CC	CC	CC	CC	CC	CC	CC	CC	CC	CC	CC	CC	CC	CC	CC	CC	CC	CC	CC	CC	CC	CC	CC
28496983|F|0-7:C>A-7:C>A	C/A	VU02	14929189	+	NA	NA	NA	NA	NA	NA	CC	CC	CC	CC	CC	CC	CC	CC	CC	CC	CC	CC	CC	CC	CC	CC	CC	CC	CC	CC	CC	CC	CC	CC	CC	CC	CC	CC	CC	CC	CC	CC	CC	CC	CC	CC	CC	CC	CC
14080254|F|0-21:G>C-21:G>C	G/C	VU02	15734740	+	NA	NA	NA	NA	NA	NA	GG	GG	CC	GG	NN	CC	GG	GG	GG	GG	GG	GG	GG	GG	GG	GG	CC	CC	GG	GG	CC	GG	GG	GG	GG	GG	CC	GG	GG	GG	GG	GG	GG	GG	GG	GG	CC	GG	GG
14079560|F|0-32:T>A-32:T>A	T/A	VU02	15739235	+	NA	NA	NA	NA	NA	NA	TT	TT	AA	TT	TT	AA	TT	TT	TT	TT	TT	TT	TT	TT	TT	TT	AA	AA	TT	TT	AA	TT	TT	TT	TT	TT	AA	TT	TT	TT	TT	TT	TT	TT	TT	TT	AA	TT	TT
14085617|F|0-5:C>T-5:C>T	C/T	VU02	15803367	+	NA	NA	NA	NA	NA	NA	CC	CC	TT	CC	CC	TT	CC	CC	CC	CC	CC	CC	CC	CC	CC	CC	TT	TT	CC	CC	TT	CC	CC	CC	CC	CC	TT	CC	CC	CC	CC	CC	CC	CC	CC	CC	TT	CC	CC
14082059|F|0-30:G>A-30:G>A	A/G	VU02	16315451	+	NA	NA	NA	NA	NA	NA	AA	AA	GG	AA	GG	GG	AA	AA	AA	AA	AA	AA	AA	AA	AA	AA	GG	GG	AA	AA	GG	AA	AA	AA	AA	AA	GG	AA	AA	AA	GG	AA	AA	GG	AA	AA	GG	GG	AA
35153477|F|0-66:T>A-66:T>A	T/A	VU02	16382509	+	NA	NA	NA	NA	NA	NA	TT	TT	TT	TT	TT	TT	TT	TT	TT	TT	TT	TT	TT	TT	TT	TT	TT	TT	TT	TT	TT	TT	TT	TT	TT	TT	TT	TT	TT	TT	TT	AA	TT	TT	TT	TT	TT	TT	TT
14087049|F|0-29:C>T-29:C>T	C/T	VU02	16414233	+	NA	NA	NA	NA	NA	NA	CC	CC	TT	CC	TT	TT	CC	CC	CC	CC	CC	CC	CC	CC	CC	CC	TT	TT	CC	CC	TT	CC	CC	CC	CC	CC	TT	CC	CC	CC	TT	CC	CC	TT	CC	CC	TT	TT	CC
14054564|F|0-10:A>G-10:A>G	A/G	VU02	16521233	+	NA	NA	NA	NA	NA	NA	AA	AA	NN	AA	AA	NN	AA	AA	AA	AA	AA	AA	AA	AA	AA	AA	NN	NN	AA	AA	NN	AA	AA	AA	AA	AA	NN	AA	AA	AA	NN	GG	AA	NN	AA	AA	NN	NN	AA
14076897|F|0-49:T>C-49:T>C	T/C	VU02	16523539	+	NA	NA	NA	NA	NA	NA	TT	TT	CC	TT	TT	CC	TT	TT	TT	TT	TT	TT	TT	TT	TT	TT	CC	CC	TT	TT	CC	TT	TT	TT	TT	TT	CC	TT	TT	TT	CT	TT	TT	CC	TT	NN	CC	CC	TT
35153440|F|0-19:T>A-19:T>A	T/A	VU02	16524560	+	NA	NA	NA	NA	NA	NA	TT	TT	AA	TT	TT	AA	TT	TT	TT	TT	TT	TT	TT	TT	TT	TT	AA	AA	TT	TT	AA	NN	TT	NN	TT	TT	NN	NN	TT	TT	AA	NN	TT	AA	TT	TT	AA	NN	TT
14078899|F|0-31:G>A-31:G>A	G/A	VU02	16677556	+	NA	NA	NA	NA	NA	NA	GG	GG	NN	GG	GG	NN	GG	GG	GG	GG	GG	GG	GG	GG	GG	GG	NN	GG	GG	GG	GG	GG	GG	GG	GG	GG	NN	GG	GG	GG	AA	GG	GG	GG	GG	GG	NN	NN	GG
14081490|F|0-46:T>C-46:T>C	T/C	VU02	16678813	+	NA	NA	NA	NA	NA	NA	TT	TT	NN	TT	TT	NN	TT	TT	TT	TT	TT	TT	TT	TT	TT	TT	NN	TT	TT	TT	TT	TT	TT	TT	TT	TT	NN	TT	TT	TT	CT	TT	TT	TT	TT	TT	TT	NN	TT
14076761|F|0-10:G>T-10:G>T	G/T	VU02	16720909	+	NA	NA	NA	NA	NA	NA	GG	GG	TT	GG	GG	TT	GG	GG	GG	GG	GG	GG	GG	GG	GG	GG	TT	GG	GG	GG	GG	GG	GG	GG	GG	GG	TT	GG	GG	GG	GG	GG	GG	GG	GG	GG	TT	TT	GG
14081839|F|0-38:A>T-38:A>T	A/T	VU02	16730699	+	NA	NA	NA	NA	NA	NA	AA	AA	TT	AA	AA	TT	NN	AA	AA	AA	AA	AA	NN	AA	AA	AA	TT	AA	AA	NN	AA	AA	AA	AA	AA	AA	TT	AA	NN	AA	NN	AA	AA	AA	AA	AA	TT	NN	AA
25355562|F|0-26:G>A-26:G>A	G/A	VU02	16858515	+	NA	NA	NA	NA	NA	NA	GG	GG	AA	GG	GG	GG	GG	GG	GG	AA	GG	GG	AA	AA	GG	GG	GG	GG	GG	GG	GG	GG	GG	GG	GG	GG	AA	GG	GG	GG	AA	GG	GG	GG	GG	NN	AA	AA	GG
14085678|F|0-29:A>G-29:A>G	A/G	VU02	16864162	+	NA	NA	NA	NA	NA	NA	AA	AA	NN	AA	AA	AA	AA	AA	AA	AA	AA	AA	AA	AA	AA	AA	AA	AA	AA	AA	AA	AA	AA	AA	AA	AA	NN	AA	AA	AA	AG	AA	AA	AA	AA	AA	NN	NN	AA
14076649|F|0-7:A>G-7:A>G	A/G	VU02	17247566	+	NA	NA	NA	NA	NA	NA	AA	AA	GG	AA	AA	AA	AA	AA	AA	AA	AA	AA	AA	AA	AA	AA	AA	AA	AA	AA	AA	AA	AA	AA	AA	AA	GG	AA	AA	AA	GG	AA	AA	AA	AA	AA	GG	GG	AA
14085042|F|0-39:T>C-39:T>C	T/C	VU02	17378830	+	NA	NA	NA	NA	NA	NA	TT	TT	CC	TT	TT	CC	TT	TT	TT	TT	TT	TT	TT	TT	TT	TT	CC	CC	TT	TT	CC	TT	TT	CT	TT	TT	CC	TT	TT	TT	CT	TT	TT	TT	TT	TT	CC	CC	TT
14073875|F|0-13:A>G-13:A>G	A/G	VU02	17498482	+	NA	NA	NA	NA	NA	NA	AA	AA	GG	AA	AA	GG	AA	AA	AA	AA	AA	AA	AA	AA	AA	AA	GG	GG	AA	AA	GG	AA	AA	GG	AA	AA	GG	AA	AA	AA	GG	AA	AA	AA	AA	AA	GG	GG	AA
14082788|F|0-63:A>C-63:A>C	C/A	VU02	17548126	+	NA	NA	NA	NA	NA	NA	AA	AA	NN	AA	AA	NN	AA	NN	AA	CC	AA	CC	CC	CC	CC	AA	NN	NN	AA	AA	NN	CC	AA	NN	CC	AA	NN	AA	CC	CC	NN	CC	AC	AA	AA	AA	NN	NN	AA
14087084|F|0-57:T>C-57:T>C	T/C	VU02	17593653	+	NA	NA	NA	NA	NA	NA	TT	TT	CC	TT	TT	CC	TT	CC	NN	TT	TT	TT	TT	TT	NN	TT	CC	CC	TT	TT	CC	TT	TT	CC	TT	CC	CC	TT	TT	TT	NN	TT	TT	TT	TT	TT	CC	CC	NN
14076207|F|0-27:C>T-27:C>T	C/T	VU02	17638385	+	NA	NA	NA	NA	NA	NA	CC	CC	CC	CC	NN	CC	CC	CC	TT	CC	CC	CC	CC	CC	CC	CC	CC	CC	CC	CC	CC	NN	CC	CC	CC	CC	CC	CC	NN	CC	CC	NN	NN	CC	NN	NN	CC	CC	TT
14076638|F|0-9:A>T-9:A>T	A/T	VU02	17656021	+	NA	NA	NA	NA	NA	NA	AA	AA	TT	AA	AA	TT	AA	TT	TT	AA	AA	AA	AA	AA	AA	AA	TT	NN	AA	AA	TT	AA	AA	TT	AA	NN	TT	AA	AA	AA	TT	AA	AA	AA	AA	AA	TT	NN	TT
35154519|F|0-29:A>C-29:A>C	C/A	VU02	17875695	+	NA	NA	NA	NA	NA	NA	CC	NN	NN	CC	CC	NN	CC	CC	NN	CC	CC	CC	CC	AA	CC	CC	NN	NN	CC	CC	CC	CC	CC	CC	CC	CC	NN	CC	CC	CC	CC	CC	CC	CC	NN	CC	CC	CC	CC
14086208|F|0-55:C>T-55:C>T	C/T	VU02	18028391	+	NA	NA	NA	NA	NA	NA	CC	CC	CC	CC	TT	CC	CC	TT	CC	CC	CC	CC	CC	CC	CC	CC	CC	CC	CC	CC	TT	CT	CC	TT	CC	TT	CC	CC	CT	CC	TT	CC	CC	CC	TT	CC	CC	TT	CC
14077128|F|0-53:A>T-53:A>T	A/T	VU02	18059728	+	NA	NA	NA	NA	NA	NA	AA	AA	AA	AA	AA	TT	AA	AA	AA	AA	TT	AA	AA	AA	AA	AA	TT	TT	AA	AA	TT	NN	AA	AA	AA	AA	NN	NN	NN	AA	NN	AA	AA	AA	AA	NN	AA	AA	AA
14074904|F|0-37:G>A-37:G>A	A/G	VU02	18315476	+	NA	NA	NA	NA	NA	NA	GG	GG	AA	AA	GG	GG	AA	GG	GG	AA	GG	AA	AA	AA	AA	GG	GG	GG	AA	GG	GG	AA	GG	GG	GG	GG	AA	AA	AA	AA	GG	AA	AA	GG	GG	GG	AA	GG	AA
25364054|F|0-8:A>G-8:A>G	A/G	VU02	18384897	+	NA	NA	NA	NA	NA	NA	AA	AA	AA	AA	AA	AA	AA	AA	AA	GG	AA	GG	GG	GG	GG	GG	AA	AA	AA	AA	AA	GG	AA	AA	AG	AA	AA	AA	AA	AA	AA	AA	GG	AA	AA	AA	AA	AA	GG
14058292|F|0-66:A>C-66:A>C	A/C	VU02	18384963	+	NA	NA	NA	NA	NA	NA	AA	AA	AA	AA	AA	AA	AA	AA	AA	CC	AA	CC	CC	CC	CC	CC	AA	AA	AA	AA	AA	CC	AA	AA	AA	AA	AA	AA	AA	AA	AA	AA	CC	AA	AA	AA	AA	AA	CC
25365348|F|0-30:G>T-30:G>T	G/T	VU02	18410111	+	NA	NA	NA	NA	NA	NA	GG	GG	GG	GG	GG	GG	GG	GG	GG	GG	GG	GG	GG	GG	GG	GG	GG	GG	GG	GG	GG	GG	GG	GG	GG	GG	GG	GG	GG	GG	GG	GG	GG	GG	GG	GG	GG	GG	TT
35153058|F|0-49:G>A-49:G>A	G/A	VU02	18499573	+	NA	NA	NA	NA	NA	NA	GG	GG	GG	GG	GG	GG	GG	GG	GG	GG	GG	AA	GG	GG	AA	GG	GG	GG	GG	GG	GG	GG	GG	GG	GG	GG	GG	GG	GG	AA	GG	GG	GG	GG	GG	GG	GG	GG	GG
14087181|F|0-20:G>C-20:G>C	C/G	VU02	18529960	+	NA	NA	NA	NA	NA	NA	GG	GG	GG	CC	GG	GG	CC	GG	GG	CC	GG	CC	CC	CC	CC	CC	GG	GG	CC	GG	GG	CC	GG	GG	GG	GG	GG	CC	CC	CC	GG	CC	CC	GG	GG	GG	GG	GG	GG
25363479|F|0-12:C>A-12:C>A	C/A	VU02	18610406	+	NA	NA	NA	NA	NA	NA	CC	CC	CC	CC	CC	CC	CC	CC	AC	CC	CC	CC	CC	CC	CC	CC	CC	CC	CC	CC	CC	CC	CC	CC	CC	CC	CC	CC	CC	CC	CC	CC	CC	CC	CC	CC	CC	CC	CC
100067521|F|0-44:T>G-44:T>G	G/T	VU02	18661012	+	NA	NA	NA	NA	NA	NA	GG	GG	GG	GG	GG	GG	GG	GG	GG	TT	GG	GG	GG	GG	GG	GG	GG	GG	GG	GG	GG	GG	GG	GG	GG	GG	GG	GG	GG	GG	GG	GG	GG	GG	GG	GG	GG	GG	GG
28203431|F|0-47:T>C-47:T>C	C/T	VU02	18661012	+	NA	NA	NA	NA	NA	NA	CC	CC	CC	CC	CC	CC	CC	CC	CC	NN	CC	CC	CC	CC	CC	CC	CC	CC	CC	CC	CC	CC	CC	CC	CC	CT	CC	CC	CC	CC	CC	CC	CC	CC	CC	CC	CC	CC	CC
14082322|F|0-21:G>A-21:G>A	G/A	VU02	18824043	+	NA	NA	NA	NA	NA	NA	GG	GG	GG	GG	GG	GG	GG	GG	GG	GG	GG	GG	GG	GG	GG	GG	GG	GG	GG	GG	GG	GG	GG	GG	GG	GG	GG	GG	GG	GG	GG	GG	GG	GG	GG	GG	GG	GG	GG
25365817|F|0-5:C>A-5:C>A	C/A	VU02	19000244	+	NA	NA	NA	NA	NA	NA	CC	NN	CC	NN	CC	CC	NN	CC	NN	CC	CC	NN	CC	CC	NN	CC	CC	CC	NN	CC	CC	CC	CC	CC	CC	CC	AA	NN	NN	NN	NN	NN	NN	CC	CC	AA	CC	CC	NN
35155149|F|0-21:A>T-21:A>T	A/T	VU02	19000244	+	NA	NA	NA	NA	NA	NA	AA	AA	AA	TT	AA	AA	TT	AA	AA	AA	AA	TT	AA	AA	TT	AA	AA	AA	TT	AA	AA	NN	AA	AA	AA	NN	AA	TT	TT	TT	NN	TT	NN	AA	AA	NN	AA	NN	AA
14081988|F|0-60:T>A-60:T>A	T/A	VU02	19060301	+	NA	NA	NA	NA	NA	NA	TT	TT	TT	TT	TT	TT	TT	TT	TT	TT	TT	TT	TT	TT	TT	TT	TT	TT	TT	TT	TT	TT	TT	TT	TT	TT	TT	TT	TT	TT	AA	TT	TT	TT	TT	TT	TT	TT	TT
14081988|F|0-68:G>A-68:G>A	G/A	VU02	19060301	+	NA	NA	NA	NA	NA	NA	GG	AG	GG	GG	GG	GG	GG	GG	AG	GG	GG	GG	GG	GG	GG	GG	GG	GG	GG	GG	GG	GG	GG	GG	GG	GG	GG	GG	GG	GG	NN	GG	GG	GG	GG	GG	GG	GG	GG
25366774|F|0-27:T>C-27:T>C	T/C	VU02	19381790	+	NA	NA	NA	NA	NA	NA	TT	TT	TT	TT	TT	TT	TT	TT	TT	TT	TT	TT	TT	TT	TT	TT	TT	TT	TT	CT	TT	TT	CT	TT	CT	TT	TT	TT	TT	TT	TT	TT	TT	TT	TT	TT	TT	TT	TT
14077173|F|0-40:A>T-40:A>T	A/T	VU02	19589593	+	NA	NA	NA	NA	NA	NA	AA	TT	AA	AA	AA	TT	AA	AA	AA	AA	AA	AA	AA	TT	AA	TT	AA	AA	AA	AA	AA	TT	AA	AA	AA	AA	AA	AA	AA	AT	AA	AA	AA	AA	AA	NN	AA	AA	AA
14074788|F|0-60:C>T-60:C>T	T/C	VU02	19753929	+	NA	NA	NA	NA	NA	NA	TT	TT	TT	TT	TT	CC	TT	TT	TT	CC	TT	TT	CC	CC	TT	TT	TT	TT	TT	TT	TT	CT	TT	TT	TT	TT	TT	TT	TT	TT	TT	TT	TT	TT	TT	TT	TT	TT	TT
14074274|F|0-28:C>A-28:C>A	C/A	VU02	19791763	+	NA	NA	NA	NA	NA	NA	AA	CC	AA	CC	CC	CC	CC	CC	CC	CC	CC	CC	CC	CC	CC	CC	CC	CC	CC	CC	AA	CC	CC	CC	CC	CC	AA	CC	CC	CC	AC	CC	CC	CC	CC	AA	AA	CC	CC
28203178|F|0-44:G>T-44:G>T	G/T	VU02	19793150	+	NA	NA	NA	NA	NA	NA	GG	GG	GG	TT	TT	GG	TT	GG	GG	GG	GG	TT	GG	GG	TT	TT	GG	GG	TT	GG	GG	TT	GG	TT	TT	TT	GG	TT	TT	NN	GG	TT	NN	GG	GG	GG	GG	TT	GG
42215629|F|0-19:C>T-19:C>T	C/T	VU02	19827481	+	NA	NA	NA	NA	NA	NA	CC	CC	CC	CC	CC	CC	CC	CC	CC	CC	CC	CC	CC	CC	CC	CC	CC	CC	CC	CC	CC	CT	CC	CC	CC	CC	CC	CC	CC	CC	CC	CC	NN	CC	CC	CC	CC	CC	CC
28203084|F|0-21:T>C-21:T>C	C/T	VU02	19829183	+	NA	NA	NA	NA	NA	NA	CC	CC	CC	TT	CC	CC	TT	CC	CC	CC	CC	TT	CC	CC	TT	TT	CC	CC	TT	CC	CC	TT	CC	CC	CC	TT	CC	TT	TT	TT	CC	TT	TT	CC	CC	CC	CC	TT	CC
28202921|F|0-42:A>G-42:A>G	A/G	VU02	19829917	+	NA	NA	NA	NA	NA	NA	AA	AA	AA	GG	AA	AA	GG	AA	AA	AA	AA	GG	AA	AA	GG	GG	AA	AA	GG	AA	AA	GG	AA	AA	NN	GG	AA	GG	GG	GG	AA	GG	GG	AA	AA	AA	NN	GG	AA
25363232|F|0-43:A>G-43:A>G	G/A	VU02	20073452	+	NA	NA	NA	NA	NA	NA	GG	GG	GG	GG	AA	AA	GG	AA	AA	GG	AA	GG	GG	GG	GG	GG	AA	AA	GG	GG	GG	GG	AA	AA	AA	GG	GG	GG	GG	NN	AA	GG	GG	AA	AA	NN	GG	GG	AA
42215849|F|0-19:C>G-19:C>G	C/G	VU02	20228096	+	NA	NA	NA	NA	NA	NA	CC	CC	CC	GG	CC	CC	GG	CC	CC	CC	CC	GG	CC	CC	CC	CC	CC	CC	GG	CC	CC	CC	CC	CC	CC	CC	NN	GG	GG	GG	CC	GG	GG	CC	CC	NN	CC	CC	CC
35153469|F|0-10:C>A-10:C>A	C/A	VU02	20228162	+	NA	NA	NA	NA	NA	NA	CC	CC	CC	AA	CC	CC	AA	CC	CC	CC	CC	AA	CC	CC	CC	CC	CC	CC	AC	CC	CC	CC	CC	CC	CC	CC	CC	AA	AA	AA	CC	AA	AA	CC	CC	NN	CC	CC	CC
14058051|F|0-30:G>A-30:G>A	G	VU02	20280041	+	NA	NA	NA	NA	NA	NA	GG	GG	GG	GG	GG	GG	GG	GG	GG	GG	GG	GG	GG	GG	GG	GG	GG	GG	GG	GG	GG	GG	GG	GG	GG	GG	GG	GG	GG	GG	GG	GG	GG	GG	GG	GG	GG	GG	GG
14077442|F|0-40:G>A-40:G>A	G/A	VU02	20323975	+	NA	NA	NA	NA	NA	NA	GG	GG	GG	GG	GG	GG	GG	GG	GG	GG	GG	GG	GG	GG	GG	GG	GG	GG	NN	GG	GG	GG	GG	GG	GG	AG	GG	GG	GG	GG	GG	GG	GG	GG	NN	GG	GG	AA	GG
14077442|F|0-47:G>A-47:G>A	G/A	VU02	20323975	+	NA	NA	NA	NA	NA	NA	GG	GG	GG	GG	GG	GG	GG	GG	GG	GG	GG	GG	GG	GG	GG	GG	GG	GG	NN	GG	GG	GG	GG	GG	GG	GG	GG	GG	GG	GG	GG	GG	GG	GG	AA	GG	GG	NN	GG
28202904|F|0-32:C>A-32:C>A	A/C	VU02	20379845	+	NA	NA	NA	NA	NA	NA	AA	AA	AA	AA	AA	AA	AA	AA	AA	CC	AA	AA	CC	NN	AA	CC	AA	AA	AA	AA	AA	CC	NN	AA	AA	CC	AA	AA	AA	AA	AA	AA	AA	NN	AA	NN	AA	CC	AA
100010376|F|0-66:C>T-66:C>T	C/T	VU02	20518847	+	NA	NA	NA	NA	NA	NA	CC	CC	CC	CC	CC	CC	CC	CC	CC	CC	CC	CC	CC	CC	CC	CC	CC	CC	CC	CC	CC	NN	CC	CC	NN	CC	CC	CC	CC	CC	CC	CC	NN	CC	CC	CC	CC	NN	CC
35153574|F|0-19:C>A-19:C>A	C/A	VU02	20565751	+	NA	NA	NA	NA	NA	NA	NN	CC	CC	CC	NN	CC	CC	CC	CC	AA	NN	CC	AA	AA	CC	AA	CC	CC	NN	CC	CC	NN	CC	CC	CC	CC	CC	AA	NN	CC	CC	CC	NN	CC	CC	NN	CC	CC	CC
35153184|F|0-36:T>G-36:T>G	T/G	VU02	20607200	+	NA	NA	NA	NA	NA	NA	TT	TT	TT	TT	TT	GG	TT	TT	TT	GG	GG	TT	GG	GG	TT	GG	TT	TT	GG	TT	TT	GG	TT	TT	TT	TT	TT	GG	TT	TT	TT	TT	TT	TT	TT	NN	TT	TT	NN
25354318|F|0-23:C>T-23:C>T	C/T	VU02	20665428	+	NA	NA	NA	NA	NA	NA	TT	TT	TT	CC	TT	CC	CC	TT	TT	CC	CC	TT	CC	CC	CC	CC	TT	TT	CC	TT	TT	CC	TT	TT	TT	CC	TT	CC	CC	CC	TT	CC	CC	TT	TT	TT	TT	CC	TT
44876286|F|0-63:G>C-63:G>C	G/C	VU02	20701883	+	NA	NA	NA	NA	NA	NA	GG	GG	GG	GG	GG	GG	GG	GG	GG	GG	GG	GG	GG	NN	GG	GG	GG	GG	GG	GG	GG	GG	GG	GG	GG	GG	GG	GG	GG	GG	GG	GG	GG	GG	GG	GG	GG	GG	GG
14078019|F|0-14:T>C-14:T>C	T/C	VU02	20918079	+	NA	NA	NA	NA	NA	NA	CC	NN	TT	TT	TT	TT	TT	CC	NN	TT	TT	TT	TT	TT	TT	TT	NN	NN	TT	TT	TT	TT	NN	CC	CC	CC	TT	TT	TT	TT	TT	TT	TT	CC	NN	CC	TT	CC	NN
14082732|F|0-64:A>T-64:A>T	T/A	VU02	21033960	+	NA	NA	NA	NA	NA	NA	TT	TT	TT	TT	TT	TT	TT	TT	AA	NN	NN	TT	TT	TT	TT	TT	AA	AA	TT	TT	TT	TT	TT	TT	TT	TT	TT	TT	TT	TT	TT	TT	TT	AA	TT	TT	TT	TT	AA
28497957|F|0-65:A>C-65:A>C	C/A	VU02	21033960	+	NA	NA	NA	NA	NA	NA	CC	CC	CC	CC	CC	CC	CC	CC	NN	AA	AA	CC	CC	CC	CC	CC	NN	NN	CC	CC	CC	CC	CC	CC	CC	CC	CC	CC	CC	CC	CC	CC	CC	NN	CC	CC	CC	CC	NN
14084178|F|0-36:T>G-36:T>G	G/T	VU02	21043664	+	NA	NA	NA	NA	NA	NA	GG	GG	GG	GG	GG	GG	GG	GG	TT	GG	GG	GG	GG	GG	GG	GG	TT	TT	GG	GG	GG	GG	GG	GG	GG	GG	GG	GG	GG	GG	GG	GG	GG	TT	GG	GG	GG	GG	TT
14057382|F|0-36:T>A-36:T>A	T/A	VU02	21046661	+	NA	NA	NA	NA	NA	NA	TT	TT	TT	TT	TT	TT	TT	TT	TT	AA	TT	TT	TT	TT	TT	TT	TT	TT	TT	TT	TT	TT	TT	TT	TT	TT	TT	TT	TT	TT	TT	TT	TT	TT	TT	TT	TT	TT	TT
14055177|F|0-34:G>C-34:G>C	G/C	VU02	21047610	+	NA	NA	NA	NA	NA	NA	GG	GG	GG	GG	GG	GG	GG	GG	GG	CC	GG	GG	GG	GG	GG	GG	GG	GG	GG	GG	GG	GG	GC	GG	GG	GG	GG	GG	GG	GG	GG	GG	GG	GG	GG	GG	GG	GG	GG
14073371|F|0-19:G>T-19:G>T	T/G	VU02	21082770	+	NA	NA	NA	NA	NA	NA	TT	TT	TT	TT	TT	TT	TT	TT	GT	TT	TT	TT	TT	TT	TT	TT	GG	GT	TT	TT	TT	TT	TT	TT	TT	TT	TT	TT	TT	TT	GG	TT	TT	GG	GG	TT	TT	TT	GG
28497664|F|0-48:C>T-48:C>T	C/T	VU02	21119758	+	NA	NA	NA	NA	NA	NA	CC	CC	CC	CC	CC	TT	CC	CC	CC	CC	CC	CC	CC	TT	TT	CC	CC	CC	CC	CC	CC	CT	CC	CC	CC	CC	CC	CC	CC	CC	CC	CC	CC	CC	CC	CC	CC	CC	CC
42774759|F|0-31:A>T-31:A>T	T	VU02	21295107	+	NA	NA	NA	NA	NA	NA	TT	TT	TT	TT	TT	TT	TT	TT	TT	TT	TT	TT	TT	TT	TT	TT	TT	TT	TT	TT	TT	NN	TT	TT	TT	TT	TT	TT	TT	TT	NN	TT	TT	NN	TT	NN	TT	TT	TT
25364087|F|0-13:T>G-13:T>G	T/G	VU02	21306172	+	NA	NA	NA	NA	NA	NA	TT	TT	TT	TT	TT	TT	TT	TT	TT	TT	TT	TT	TT	GG	TT	TT	TT	TT	TT	TT	TT	TT	TT	TT	TT	TT	TT	TT	TT	TT	TT	TT	TT	TT	TT	TT	TT	TT	TT
28203001|F|0-38:T>C-38:T>C	T/C	VU02	21537885	+	NA	NA	NA	NA	NA	NA	TT	TT	TT	TT	TT	TT	TT	TT	TT	TT	TT	TT	TT	TT	TT	TT	TT	TT	TT	TT	TT	TT	TT	TT	TT	TT	TT	TT	TT	TT	TT	TT	TT	TT	TT	NN	TT	TT	TT
14074530|F|0-26:C>A-26:C>A	C/A	VU02	21724091	+	NA	NA	NA	NA	NA	NA	CC	CC	CC	CC	CC	CC	CC	AA	AC	CC	CC	CC	CC	AA	CC	CC	CC	CC	CC	CC	CC	AA	AA	CC	CC	CC	CC	CC	CC	CC	CC	CC	CC	CC	CC	CC	CC	CC	CC
14076818|F|0-10:G>A-10:G>A	G/A	VU02	21731860	+	NA	NA	NA	NA	NA	NA	GG	GG	GG	GG	GG	GG	GG	AA	AA	GG	GG	GG	GG	AA	GG	GG	GG	GG	GG	GG	GG	AA	AA	GG	GG	GG	GG	GG	GG	GG	GG	GG	GG	GG	GG	NN	GG	GG	GG
35153566|F|0-29:C>G-29:C>G	G/C	VU02	21989078	+	NA	NA	NA	NA	NA	NA	CC	CC	CC	GG	CC	CC	GG	GG	CC	GG	GG	GG	GG	GG	GG	GG	NN	CC	NN	CC	CC	NN	CC	NN	NN	GG	NN	NN	CC	GG	CC	GG	NN	CC	CC	NN	CC	NN	CC
25363059|F|0-16:G>A-16:G>A	A/G	VU02	22084227	+	NA	NA	NA	NA	NA	NA	GG	GG	GG	AA	GG	AA	AA	GG	GG	AA	AA	AA	AA	AA	AA	AA	GG	GG	AA	GG	GG	AG	GG	GG	GG	AA	GG	AA	GG	AA	GG	AA	AA	GG	GG	GG	AG	GG	GG
35154196|F|0-44:T>A-44:T>A	A/T	VU02	22093964	+	NA	NA	NA	NA	NA	NA	AA	AA	AA	TT	AA	AA	NN	AA	AA	TT	TT	TT	AA	TT	TT	TT	AA	AA	TT	AA	AA	NN	AA	AA	NN	TT	AA	TT	AA	NN	AA	NN	TT	AA	AA	AA	NN	AA	AA
14058615|F|0-32:G>A-32:G>A	G/A	VU02	22145207	+	NA	NA	NA	NA	NA	NA	GG	GG	GG	GG	GG	GG	GG	GG	GG	AA	AA	GG	AA	GG	GG	AA	GG	GG	GG	GG	GG	GG	GG	GG	GG	GG	GG	GG	GG	GG	GG	GG	GG	GG	GG	GG	GG	GG	GG
42215802|F|0-40:C>T-40:C>T	T	VU02	22349054	+	NA	NA	NA	NA	NA	NA	TT	TT	TT	TT	TT	TT	TT	TT	TT	TT	TT	TT	TT	TT	TT	TT	TT	TT	TT	TT	TT	TT	TT	NN	NN	NN	TT	TT	TT	NN	TT	TT	TT	TT	TT	NN	TT	TT	TT
14076423|F|0-8:T>C-8:T>C	T	VU02	22349120	+	NA	NA	NA	NA	NA	NA	TT	TT	TT	TT	TT	TT	TT	TT	TT	TT	TT	TT	TT	TT	TT	TT	TT	TT	TT	TT	TT	TT	TT	TT	TT	TT	TT	TT	TT	TT	TT	TT	TT	TT	TT	TT	TT	TT	TT
25366729|F|0-21:G>C-21:G>C	G/C	VU02	22374912	+	NA	NA	NA	NA	NA	NA	CC	GG	GG	GG	GG	GG	GG	GG	GC	GG	GG	GG	GG	GG	GG	GG	GG	GG	GG	GG	GG	GG	GG	GG	GG	GG	GG	GG	GG	GG	CC	GG	GG	GG	GG	GG	GG	GG	GG
14074447|F|0-53:T>G-53:T>G	G/T	VU02	22375395	+	NA	NA	NA	NA	NA	NA	NN	GG	GG	GG	GG	GG	GG	GG	GT	GG	GG	GG	GG	GG	GG	GG	GG	GG	GT	GG	GG	GG	GG	GG	GG	GG	GG	GG	GG	GG	NN	GG	GG	GG	GG	GG	GG	GG	GG
35152770|F|0-59:A>G-59:A>G	A/G	VU02	22407255	+	NA	NA	NA	NA	NA	NA	AA	AA	AA	GG	AA	AA	GG	AA	AA	AA	AA	GG	AA	AA	GG	AA	AA	AA	GG	AA	AA	AA	AA	AA	AA	AA	AA	GG	GG	AA	GG	AA	NN	AA	AA	NN	AA	AA	AA
14081856|F|0-8:A>G-8:A>G	A/G	VU02	22408605	+	NA	NA	NA	NA	NA	NA	AA	AA	AA	GG	AA	AA	GG	NN	AA	AA	AA	GG	AA	AA	GG	AA	AA	AA	GG	AA	AA	AA	AA	AA	AA	AA	NN	GG	GG	AA	NN	AA	NN	AA	NN	AA	AA	AA	AA
14074978|F|0-65:A>T-65:A>T	A/T	VU02	22441729	+	NA	NA	NA	NA	NA	NA	TT	AA	AA	AA	AA	AA	AA	AA	AA	AA	AA	AA	AA	AA	AA	AA	AA	AA	AA	AA	AA	AA	AA	AA	AA	AA	AA	AA	AA	AA	TT	AA	AA	AA	AA	AA	AA	AA	AA
100011389|F|0-31:C>T-31:C>T	C/T	VU02	22485137	+	NA	NA	NA	NA	NA	NA	TT	CC	CC	CC	CC	CC	CC	CC	CC	CC	CC	CC	NN	CC	CC	CC	CC	CC	CC	CC	CC	NN	NN	CC	CC	CC	CC	NN	CC	CC	CC	CC	CC	CC	CC	NN	CC	CC	CC
28497693|F|0-61:G>T-61:G>T	G/T	VU02	22528067	+	NA	NA	NA	NA	NA	NA	TT	GG	GG	GG	GG	TT	GG	GG	GG	GG	GG	GG	GG	GG	GG	GG	GG	GG	GG	GG	GG	GG	GG	GG	GG	GG	GG	GG	TT	TT	GG	TT	GG	GG	GG	GG	GG	GG	GG
14056706|F|0-58:C>A-58:C>A	C/A	VU02	22554001	+	NA	NA	NA	NA	NA	NA	AA	CC	CC	CC	CC	CC	CC	CC	CC	CC	CC	CC	CC	CC	CC	CC	CC	CC	CC	CC	CC	CC	CC	CC	CC	CC	CC	CC	CC	CC	CC	CC	CC	CC	CC	CC	CC	CC	CC
14073328|F|0-55:G>C-55:G>C	G/C	VU02	22635774	+	NA	NA	NA	NA	NA	NA	GG	GG	GG	GG	GG	GG	GG	GG	GG	GG	GG	GG	GG	GG	GG	GG	GG	GG	GG	GG	NN	GG	GG	GG	GG	GG	GG	GG	CC	GC	NN	CC	GG	NN	NN	GG	GG	NN	GG
14083595|F|0-29:G>A-29:G>A	G/A	VU02	22645592	+	NA	NA	NA	NA	NA	NA	NN	AA	AA	GG	AA	AA	GG	AA	AA	GG	GG	GG	GG	GG	GG	GG	AG	GG	GG	AA	GG	GG	AA	AA	AA	GG	AA	GG	GG	GG	GG	GG	GG	GG	GG	AA	AA	GG	AA
14085447|F|0-11:T>C-11:T>C	T/C	VU02	22655257	+	NA	NA	NA	NA	NA	NA	TT	CC	CC	TT	CC	CC	TT	CC	CC	TT	TT	TT	TT	TT	TT	TT	CT	TT	TT	CC	TT	TT	CC	CC	CC	TT	CC	TT	TT	TT	TT	TT	TT	TT	TT	CC	CC	TT	CC
14085447|F|0-28:G>A-28:G>A	G/A	VU02	22655257	+	NA	NA	NA	NA	NA	NA	GG	AA	AA	GG	AA	AA	GG	AA	AA	GG	GG	GG	GG	GG	GG	GG	AG	GG	GG	AA	GG	GG	AA	AA	AA	GG	AA	GG	GG	GG	GG	GG	GG	GG	GG	AA	AA	GG	AA
25356882|F|0-34:C>T-34:C>T	C/T	VU02	22667566	+	NA	NA	NA	NA	NA	NA	TT	CC	CC	CC	CC	CC	CC	CC	CC	CC	CC	CC	CC	CC	CC	CC	CT	CT	CC	CC	CT	CC	CC	CC	CC	CC	CC	CC	CC	CC	CT	CC	CC	CT	CT	CC	CC	CT	CC
14075647|F|0-31:G>A-31:G>A	G/A	VU02	22699310	+	NA	NA	NA	NA	NA	NA	GG	AA	AA	GG	AA	AA	GG	AA	AG	GG	GG	GG	GG	GG	GG	GG	AG	GG	GG	AA	GG	GG	AA	AA	AG	GG	AA	GG	GG	GG	GG	GG	GG	GG	GG	AA	AA	GG	AA
14075721|F|0-61:C>T-61:C>T	C/T	VU02	22727879	+	NA	NA	NA	NA	NA	NA	CC	CC	CC	CC	CC	CC	CC	CC	CC	CC	CC	CC	CC	CC	CC	CC	CC	CC	CC	CC	CC	CC	CC	CC	CC	CC	CC	CC	CC	CC	CC	CC	CC	CC	CC	CC	CC	CC	CC
35154021|F|0-40:C>G-40:C>G	C/G	VU02	22752287	+	NA	NA	NA	NA	NA	NA	CC	GG	CC	CC	GG	CC	CC	CC	GC	CC	CC	CC	CC	CC	CC	CC	GC	CC	CC	CC	CC	CC	CC	CC	CC	CC	CC	CC	CC	CC	GG	CC	CC	GG	GG	NN	GG	GG	CC
14075068|F|0-48:T>G-48:T>G	T/G	VU02	22762504	+	NA	NA	NA	NA	NA	NA	TT	GG	TT	TT	TT	TT	TT	TT	TT	TT	TT	TT	TT	TT	TT	TT	TT	TT	TT	TT	TT	TT	TT	TT	TT	TT	TT	TT	TT	TT	TT	TT	TT	TT	TT	TT	GG	TT	TT
14083583|F|0-46:A>G-46:A>G	G/A	VU02	22797633	+	NA	NA	NA	NA	NA	NA	AA	AA	GG	AA	AA	GG	AA	AA	AG	GG	AA	GG	GG	GG	GG	AA	AG	GG	AA	GG	GG	GG	AA	GG	GG	GG	GG	AA	AA	AA	AA	AA	GG	AA	AA	GG	AA	AA	GG
25366014|F|0-29:A>G-29:A>G	A/G	VU02	22798613	+	NA	NA	NA	NA	NA	NA	AA	AA	AA	AA	AA	AA	AA	AA	AG	AA	AA	AA	AA	AA	AA	AA	AA	AA	AA	AA	AA	AA	AA	AA	AA	AA	AA	AA	AA	AA	AA	AA	AA	AA	AA	AA	AA	AA	AA
14074961|F|0-15:T>C-15:T>C	T/C	VU02	22815438	+	NA	NA	NA	NA	NA	NA	TT	TT	TT	TT	CC	TT	TT	TT	TT	TT	TT	TT	TT	TT	TT	TT	CT	CC	TT	TT	CC	TT	TT	TT	TT	TT	TT	TT	TT	TT	CC	TT	TT	TT	TT	TT	TT	CC	TT
14074172|F|0-36:T>A-36:T>A	T/A	VU02	22886909	+	NA	NA	NA	NA	NA	NA	AA	AA	TT	TT	TT	TT	TT	TT	TT	TT	TT	TT	TT	TT	TT	TT	TT	TT	TT	TT	TT	TT	TT	TT	TT	TT	TT	TT	TT	TT	TT	TT	TT	TT	TT	TT	AA	TT	TT
14082776|F|0-33:C>T-33:C>T	T/C	VU02	22954944	+	NA	NA	NA	NA	NA	NA	CC	CC	TT	NN	TT	TT	NN	TT	TT	TT	TT	NN	TT	TT	TT	TT	TT	TT	NN	TT	TT	TT	TT	TT	TT	NN	TT	NN	TT	TT	TT	TT	TT	NN	TT	TT	CC	NN	CC
25363910|F|0-10:A>G-10:A>G	G/A	VU02	22954944	+	NA	NA	NA	NA	NA	NA	NN	NN	GG	AA	GG	GG	AA	GG	AG	GG	GG	AA	GG	GG	GG	GG	GG	GG	AA	GG	GG	GG	GG	GG	GG	AA	GG	AA	GG	GG	GG	GG	GG	NN	GG	GG	NN	NN	NN
14080110|F|0-10:C>G-10:C>G	C/G	VU02	23066270	+	NA	NA	NA	NA	NA	NA	CC	GG	GG	CC	CC	CC	CC	CC	CC	CC	CC	CC	CC	CC	CC	CC	GC	GG	CC	CC	GG	CC	CC	CC	CC	CC	GG	CC	CC	CC	GG	CC	CC	GG	CC	GG	GG	GG	GG
14075298|F|0-31:C>A-31:C>A	C/A	VU02	23073976	+	NA	NA	NA	NA	NA	NA	CC	AA	AA	CC	CC	CC	CC	CC	CC	CC	CC	CC	CC	CC	CC	CC	AC	AA	CC	CC	AA	CC	CC	CC	CC	CC	AA	AC	CC	CC	AA	CC	CC	AA	CC	AA	AA	AA	AA
14062051|F|0-26:A>C-26:A>C	A/C	VU02	23074042	+	NA	NA	NA	NA	NA	NA	AA	NN	NN	AA	AA	AA	AA	AA	AA	AA	AA	AA	AA	AA	AA	AA	AA	NN	AA	AA	NN	AA	AA	AA	AA	AA	NN	AA	AA	AA	AA	AA	AA	NN	AA	NN	NN	NN	NN
14080561|F|0-18:G>A-18:G>A	G/A	VU02	23086111	+	NA	NA	NA	NA	NA	NA	AA	NN	AA	GG	GG	GG	GG	GG	GG	GG	GG	GG	GG	GG	GG	GG	AG	AA	GG	GG	AA	GG	GG	GG	GG	GG	AA	GG	GG	GG	AA	GG	GG	AA	GG	AA	GG	AA	NN
14086713|F|0-28:G>A-28:G>A	G/A	VU02	23097894	+	NA	NA	NA	NA	NA	NA	GG	GG	GG	GG	GG	GG	GG	GG	GG	GG	GG	GG	GG	GG	GG	GG	GG	GG	GG	GG	GG	GG	GG	GG	GG	GG	GG	GG	AA	AA	GG	AA	GG	GG	GG	GG	GG	GG	GG
14086471|F|0-8:G>A-8:G>A	G/A	VU02	23097960	+	NA	NA	NA	NA	NA	NA	NN	NN	GG	GG	GG	GG	GG	GG	NN	GG	GG	GG	GG	GG	GG	GG	GG	GG	GG	GG	GG	GG	GG	GG	GG	GG	GG	GG	AA	AA	GG	AA	GG	GG	GG	GG	NN	GG	NN
100045050|F|0-10:G>T-10:G>T	G/T	VU02	23131712	+	NA	NA	NA	NA	NA	NA	GG	GG	GG	GG	GG	GG	GG	GG	GG	GG	GG	GG	GG	GG	GG	GG	GG	GG	NN	GG	GG	GG	GG	GG	GG	GG	GG	GG	GG	GG	GG	GG	GG	GG	GG	GG	GG	GG	GG
25358609|F|0-52:A>G-52:A>G	A/G	VU02	23234651	+	NA	NA	NA	NA	NA	NA	AA	AA	AA	GG	AA	AA	GG	AA	AG	AA	AA	GG	AA	AA	AA	AA	AA	AA	GG	AA	AA	AA	AA	AA	AA	AA	AA	GG	GG	GG	AA	GG	AA	AA	AA	NN	AA	AA	AA
25358609|F|0-8:T>A-8:T>A	T/A	VU02	23234651	+	NA	NA	NA	NA	NA	NA	TT	TT	TT	NN	TT	TT	NN	TT	TT	TT	TT	NN	TT	TT	TT	TT	TT	TT	NN	TT	TT	TT	TT	TT	TT	TT	TT	NN	NN	NN	TT	NN	TT	TT	TT	AA	TT	TT	TT
14061291|F|0-8:G>T-8:G>T	G/T	VU02	23235308	+	NA	NA	NA	NA	NA	NA	GG	GG	GG	TT	GG	GG	TT	GG	GG	GG	GG	TT	GG	GG	GG	GG	GG	GG	TT	GG	GG	GG	GG	GG	GG	GG	GG	TT	TT	TT	GG	TT	GG	GG	GG	GG	GG	GG	GG
14075260|F|0-62:G>C-62:G>C	C/G	VU02	23256185	+	NA	NA	NA	NA	NA	NA	GG	GG	GG	CC	GG	GG	CC	CC	CC	CC	CC	CC	CC	CC	CC	CC	GC	CC	CC	GG	GG	CC	CC	CC	CC	CC	GG	CC	CC	CC	CC	CC	CC	CC	GG	GG	CC	GG	CC
25353322|F|0-7:G>C-7:G>C	G/C	VU02	23273789	+	NA	NA	NA	NA	NA	NA	GG	GG	GG	GG	GG	GG	GG	CC	GG	CC	GG	GG	CC	CC	GG	GG	GG	GG	GG	GG	GG	GC	GG	GC	GG	GG	GG	GG	GG	GG	GG	GG	GG	GG	GG	GG	GG	GG	GG
35154513|F|0-22:C>T-22:C>T	T/C	VU02	23273855	+	NA	NA	NA	NA	NA	NA	TT	TT	TT	NN	TT	TT	NN	CC	TT	CC	TT	NN	CC	CC	TT	TT	TT	NN	NN	TT	TT	TT	TT	CT	TT	TT	TT	NN	NN	NN	NN	NN	TT	TT	TT	NN	TT	TT	NN
28203176|F|0-19:T>G-19:T>G	G/T	VU02	23342131	+	NA	NA	NA	NA	NA	NA	GG	GG	GG	TT	GG	GG	TT	GG	GG	GG	GG	TT	GG	GG	GG	GG	GT	GG	TT	GG	GG	GG	GG	GG	GG	GG	GG	TT	TT	TT	NN	TT	GG	GG	GG	GG	GG	GG	GG
25359112|F|0-9:A>G-9:A>G	A/G	VU02	23362349	+	NA	NA	NA	NA	NA	NA	AA	AA	AA	GG	AA	AA	GG	AA	AA	AA	AA	GG	AA	AA	AA	AA	AA	AA	GG	AA	AA	AA	AA	AA	AA	AA	AA	GG	GG	GG	AA	GG	AA	AA	AA	NN	AA	AA	AA
42215405|F|0-58:G>C-58:G>C	G/C	VU02	23373678	+	NA	NA	NA	NA	NA	NA	GG	GG	GG	CC	GG	GG	CC	NN	GG	GG	GG	CC	GG	GG	GG	GG	GG	GG	CC	GG	GG	GG	GG	GG	GG	GG	GG	CC	CC	GC	GG	NN	GG	GG	GG	NN	GG	GG	GG
14085209|F|0-9:C>T-9:C>T	C/T	VU02	23373744	+	NA	NA	NA	NA	NA	NA	CC	CC	CC	NN	CC	CC	NN	CC	CC	TT	TT	NN	TT	TT	CC	TT	CT	NN	NN	CC	CC	CT	CC	CC	CC	CC	CC	NN	NN	TT	CC	NN	CC	CC	CC	NN	CC	NN	NN
14056525|F|0-59:G>A-59:G>A	G/A	VU02	23394554	+	NA	NA	NA	NA	NA	NA	GG	GG	GG	AA	GG	GG	AA	GG	GG	GG	GG	AA	GG	GG	GG	GG	GG	GG	AA	GG	GG	GG	GG	GG	GG	GG	GG	AA	AA	AA	GG	AA	GG	GG	GG	NN	GG	GG	GG
14086030|F|0-27:T>C-27:T>C	C/T	VU02	23397032	+	NA	NA	NA	NA	NA	NA	CC	CC	NN	NN	CC	TT	NN	TT	CC	CC	CC	NN	CC	CC	TT	CC	CC	NN	CC	CC	CC	CT	CC	TT	TT	TT	NN	NN	NN	CC	TT	NN	TT	CC	NN	NN	CC	NN	NN
14082858|F|0-47:T>C-47:T>C	T/C	VU02	23397098	+	NA	NA	NA	NA	NA	NA	TT	TT	NN	CC	TT	TT	CC	TT	TT	TT	TT	CC	TT	TT	TT	TT	TT	NN	CT	TT	TT	TT	TT	TT	TT	TT	NN	CC	CC	CC	TT	CC	TT	TT	NN	NN	TT	NN	NN
14082858|F|0-49:C>T-49:C>T	C/T	VU02	23397098	+	NA	NA	NA	NA	NA	NA	CC	CC	NN	NN	CC	CC	NN	CC	CC	CC	CC	NN	CC	CC	CC	CC	CC	TT	CC	CC	CC	CC	CC	CC	CC	CC	NN	NN	NN	NN	CC	NN	CC	CC	TT	NN	CC	TT	TT
14081991|F|0-44:T>C-44:T>C	T	VU02	23401701	+	NA	NA	NA	NA	NA	NA	TT	TT	TT	NN	TT	TT	NN	TT	TT	TT	TT	TT	TT	TT	TT	TT	TT	NN	NN	TT	TT	TT	TT	TT	TT	TT	TT	NN	NN	TT	TT	NN	TT	TT	NN	NN	TT	NN	NN
14081991|F|0-51:C>T-51:C>T	C/T	VU02	23401701	+	NA	NA	NA	NA	NA	NA	CC	CC	CC	NN	CC	CC	NN	CC	CC	CC	CC	CC	CC	CC	CC	CC	CC	TT	NN	CC	CC	CC	CC	CC	CC	CC	CC	NN	NN	CC	CC	NN	CC	CC	TT	TT	CC	TT	TT
14076860|F|0-55:G>A-55:G>A	G/A	VU02	23401767	+	NA	NA	NA	NA	NA	NA	GG	GG	GG	AA	GG	GG	AA	GG	GG	GG	GG	AA	GG	GG	GG	GG	GG	NN	AA	GG	GG	GG	GG	GG	GG	GG	GG	AA	AA	AA	GG	AA	GG	GG	NN	NN	GG	NN	NN
14076860|F|0-66:C>T-66:C>T	T/C	VU02	23401767	+	NA	NA	NA	NA	NA	NA	TT	TT	TT	NN	TT	TT	NN	TT	TT	TT	TT	NN	TT	TT	TT	TT	TT	CC	NN	TT	TT	TT	TT	TT	TT	TT	TT	NN	NN	NN	TT	NN	TT	TT	CC	NN	TT	CC	CC
28497427|F|0-40:A>G-40:A>G	A/G	VU02	23433106	+	NA	NA	NA	NA	NA	NA	AA	AA	AA	AA	AA	AA	AA	AA	AA	GG	GG	AA	AA	AA	AA	GG	AA	AA	AA	AA	AA	AA	AA	AA	AA	AA	AA	AA	AA	AA	AA	AA	AA	AA	AA	AA	AA	AA	AA
14077393|F|0-59:T>C-59:T>C	C/T	VU02	23438875	+	NA	NA	NA	NA	NA	NA	CC	CC	TT	CC	CC	CC	CC	CC	CC	CC	CC	CC	CC	CC	CC	CC	CC	TT	CC	TT	TT	CC	CC	CC	CC	CC	TT	CC	NN	CC	NN	CC	CC	CC	NN	NN	CC	NN	TT
14076594|F|0-64:A>G-64:A>G	A/G	VU02	23439114	+	NA	NA	NA	NA	NA	NA	AA	AA	GG	AA	AA	AA	AA	AA	AA	AA	AA	AA	AA	AA	AA	AA	AA	GG	AA	GG	GG	AA	AA	AA	AA	AA	GG	AA	AA	AA	AA	AA	AA	AA	GG	GG	AA	GG	GG
14083947|F|0-11:T>G-11:T>G	T/G	VU02	23441078	+	NA	NA	NA	NA	NA	NA	TT	GG	TT	GG	TT	TT	GG	TT	TT	TT	TT	GG	TT	TT	GG	TT	GT	TT	GG	TT	NN	GG	TT	GG	TT	GG	TT	GG	GG	GG	GG	GG	GG	TT	TT	TT	TT	TT	TT
14077310|F|0-9:G>T-9:G>T	T/G	VU02	23441136	+	NA	NA	NA	NA	NA	NA	TT	GG	TT	GG	TT	TT	GG	TT	TT	TT	TT	GG	TT	TT	GG	TT	GT	TT	GG	TT	TT	GG	TT	GG	TT	GG	TT	GG	GG	GT	GT	GG	GG	TT	TT	TT	TT	TT	TT
14077055|F|0-29:C>T-29:C>T	C/T	VU02	23479973	+	NA	NA	NA	NA	NA	NA	CC	CC	TT	CC	CC	CC	CC	TT	CC	CC	CC	CC	CC	CC	CC	CC	CC	CC	CC	TT	TT	CC	CC	CC	TT	CC	TT	CC	CC	CC	CC	CC	CC	CC	CC	TT	CC	CC	CC
14073536|F|0-25:A>G-25:A>G	G/A	VU02	23556600	+	NA	NA	NA	NA	NA	NA	GG	GG	AA	GG	GG	GG	GG	NN	NN	GG	GG	GG	GG	GG	GG	GG	GG	AA	GG	AA	AA	NN	GG	GG	AA	GG	AA	GG	GG	GG	AA	GG	GG	GG	GG	AA	GG	GG	AA
14082425|F|0-10:T>C-10:T>C	T/C	VU02	23587481	+	NA	NA	NA	NA	NA	NA	TT	TT	TT	TT	TT	TT	NN	CC	TT	TT	TT	TT	TT	TT	TT	TT	CT	NN	TT	TT	NN	TT	NN	TT	CC	TT	TT	TT	TT	TT	CC	TT	TT	TT	NN	CC	TT	TT	NN
14082425|F|0-50:T>A-50:T>A	T/A	VU02	23587481	+	NA	NA	NA	NA	NA	NA	TT	TT	TT	TT	TT	TT	NN	NN	TT	TT	TT	TT	TT	TT	TT	TT	TT	AA	TT	TT	AA	TT	NN	TT	NN	TT	TT	TT	TT	TT	NN	TT	TT	TT	AA	NN	TT	AT	AA
14076210|F|0-39:A>T-39:A>T	T/A	VU02	23617039	+	NA	NA	NA	NA	NA	NA	TT	TT	TT	TT	TT	TT	TT	TT	TT	TT	TT	TT	TT	TT	TT	TT	TT	AA	NN	TT	AA	NN	TT	TT	TT	TT	TT	NN	TT	TT	TT	TT	TT	TT	AA	NN	AA	NN	NN
14079235|F|0-36:A>G-36:A>G	G/A	VU02	23693300	+	NA	NA	NA	NA	NA	NA	AA	AA	AA	AA	AA	AA	AA	AA	AA	GG	GG	GG	GG	GG	GG	GG	AG	AA	AA	AG	AA	GG	AA	AA	AA	GG	AA	AA	GG	AA	AG	AA	GG	AA	AA	AA	AG	AA	AA
14082950|F|0-68:T>A-68:T>A	A/T	VU02	23712535	+	NA	NA	NA	NA	NA	NA	TT	TT	TT	AA	TT	AA	AA	AA	AA	AA	AA	AA	AA	AA	AA	AA	AT	AA	AA	AT	AA	AA	AA	AA	AA	AA	TT	AA	AA	AA	TT	AA	AA	AA	AA	TT	AA	AA	AA
25363912|F|0-64:T>G-64:T>G	T/G	VU02	23716478	+	NA	NA	NA	NA	NA	NA	GG	GG	GG	TT	GG	TT	TT	TT	GG	TT	TT	TT	TT	TT	TT	TT	GT	GG	TT	GG	GG	TT	TT	TT	TT	TT	GG	TT	TT	TT	GG	TT	TT	GG	GG	GG	GG	TT	GG
14073283|F|0-30:C>A-30:C>A	C/A	VU02	23747606	+	NA	NA	NA	NA	NA	NA	CC	CC	CC	AA	CC	CC	AA	CC	CC	CC	CC	CC	CC	CC	CC	CC	AC	CC	AA	CC	CC	CC	CC	CC	CC	CC	CC	AA	AA	AA	CC	AA	CC	CC	CC	CC	CC	CC	CC
14073505|F|0-24:G>T-24:G>T	T/G	VU02	23749546	+	NA	NA	NA	NA	NA	NA	TT	TT	TT	GG	TT	TT	GG	TT	GG	TT	TT	TT	TT	TT	TT	TT	GT	GG	GG	GT	GG	TT	GG	TT	TT	TT	TT	GG	GG	GG	TT	GG	TT	GG	GG	TT	GG	GG	GG
14084619|F|0-38:G>T-38:G>T	G/T	VU02	23752316	+	NA	NA	NA	NA	NA	NA	GG	GG	GG	GG	GG	NN	GG	NN	GG	GG	GG	GG	GG	GG	GG	GG	GG	GG	GG	GG	GG	GG	TT	NN	NN	GG	GG	NN	GG	GG	GG	GG	GG	GG	GG	GG	GG	TT	GG
14084619|F|0-67:G>A-67:G>A	G/A	VU02	23752316	+	NA	NA	NA	NA	NA	NA	GG	GG	GG	GG	GG	AA	GG	AA	GG	GG	GG	GG	GG	GG	GG	GG	GG	GG	GG	GG	GG	AG	NN	AA	AA	GG	GG	NN	GG	GG	GG	GG	GG	GG	GG	GG	GG	NN	GG
14086062|F|0-15:G>T-15:G>T	G/T	VU02	23752382	+	NA	NA	NA	NA	NA	NA	GG	GG	GG	GG	GG	GT	GG	GT	GG	GT	TT	GT	GT	GT	GT	GT	GG	GG	GG	GG	GG	GT	GG	GT	GT	GG	GG	GG	GG	GG	GG	GG	GT	GG	GG	GG	GT	GG	GG
14085498|F|0-19:A>T-19:A>T	T/A	VU02	23757396	+	NA	NA	NA	NA	NA	NA	TT	TT	TT	TT	TT	TT	TT	TT	NN	TT	TT	TT	TT	TT	TT	TT	AT	NN	TT	TT	NN	TT	TT	TT	TT	TT	TT	TT	TT	TT	TT	TT	TT	NN	NN	TT	NN	TT	NN
14076248|F|0-62:T>A-62:T>A	T/A	VU02	23776376	+	NA	NA	NA	NA	NA	NA	TT	TT	TT	TT	TT	TT	TT	TT	TT	TT	TT	TT	TT	TT	TT	TT	TT	AT	TT	TT	AA	TT	AT	TT	TT	TT	TT	TT	TT	TT	TT	TT	TT	AA	AA	TT	TT	AA	AA
14081792|F|0-14:C>T-14:C>T	C/T	VU02	23776553	+	NA	NA	NA	NA	NA	NA	CC	CC	CC	CC	CC	CC	CC	CC	CC	CC	CC	CC	CC	CC	CC	CC	CC	TT	CC	CC	TT	CC	TT	CC	CC	CC	CC	CC	CC	CC	CC	CC	CC	TT	TT	CC	CC	TT	TT
14087078|F|0-53:T>C-53:T>C	T/C	VU02	23776619	+	NA	NA	NA	NA	NA	NA	CC	CC	CC	TT	CC	TT	TT	TT	TT	TT	TT	TT	TT	TT	TT	TT	CT	CC	TT	CC	CC	TT	CC	TT	TT	TT	CC	TT	TT	TT	TT	TT	TT	CC	CC	CC	CT	CC	CC
14077571|F|0-24:C>T-24:C>T	C/T	VU02	23794771	+	NA	NA	NA	NA	NA	NA	CC	CC	CC	CC	CC	CC	CC	NN	CC	CC	CC	CC	CC	CC	CC	CC	CC	CC	CC	CC	CC	NN	CC	CC	CC	CC	CC	CC	CC	CC	CC	CC	CC	CC	CC	NN	CC	CC	CC
14077282|F|0-10:G>A-10:G>A	G/A	VU02	23826338	+	NA	NA	NA	NA	NA	NA	GG	GG	GG	GG	AA	GG	GG	GG	GG	GG	GG	GG	GG	GG	GG	GG	GG	NN	GG	GG	NN	GG	GG	NN	GG	GG	GG	GG	GG	GG	GG	GG	GG	GG	NN	NN	GG	GG	GG
14077282|F|0-61:C>T-61:C>T	C/T	VU02	23826338	+	NA	NA	NA	NA	NA	NA	CC	CC	CC	CC	NN	CC	CC	CC	CC	CC	CC	CC	CC	CC	CC	CC	CC	TT	CC	CC	TT	CC	CC	NN	CC	CC	CC	CC	CC	CC	CC	CC	CC	CC	NN	NN	CC	CC	CC
25363858|F|0-36:T>C-36:T>C	C/T	VU02	23829221	+	NA	NA	NA	NA	NA	NA	CC	CC	CC	CC	CC	CC	CC	CC	CC	TT	TT	TT	TT	TT	TT	TT	CC	NN	CC	CC	NN	CT	CC	CC	CC	TT	CC	CC	CC	CC	CC	CC	TT	CC	CC	CC	CC	CC	CC
25365376|F|0-10:T>C-10:T>C	T/C	VU02	23866991	+	NA	NA	NA	NA	NA	NA	TT	TT	TT	TT	TT	TT	TT	TT	TT	CC	CC	CC	CC	CC	CC	CC	TT	TT	TT	TT	TT	CT	TT	TT	TT	CC	TT	TT	TT	TT	TT	TT	CC	TT	TT	TT	TT	TT	TT
14087614|F|0-32:A>G-32:A>G	A/G	VU02	23887379	+	NA	NA	NA	NA	NA	NA	AA	AA	AA	AG	NN	AA	AG	NN	AA	AA	AA	AA	AA	AA	AA	AA	AA	AA	AG	AA	AA	AG	NN	NN	NN	AA	AA	AG	AG	AG	AA	AG	AA	NN	NN	NN	AA	AA	AA
28498141|F|0-27:G>T-27:G>T	T/G	VU02	23888550	+	NA	NA	NA	NA	NA	NA	TT	NN	TT	TT	TT	TT	TT	TT	TT	GG	NN	GG	GG	GG	GG	GG	TT	TT	TT	TT	TT	GT	TT	TT	TT	GG	TT	TT	TT	TT	TT	TT	GG	TT	TT	TT	TT	TT	TT
28498142|F|0-24:G>T-24:G>T	T/G	VU02	23888550	+	NA	NA	NA	NA	NA	NA	TT	NN	TT	TT	TT	TT	TT	TT	TT	GG	GG	GG	GG	GG	GG	GG	TT	TT	TT	TT	TT	GT	TT	TT	TT	GG	TT	TT	TT	TT	TT	TT	GG	TT	TT	TT	TT	TT	TT
14087716|F|0-11:G>A-11:G>A	A/G	VU02	23888616	+	NA	NA	NA	NA	NA	NA	AA	NN	AA	AG	AA	AG	AG	AA	AA	GG	GG	GG	GG	GG	GG	GG	AA	AG	AG	AA	AG	GG	AA	AA	AA	GG	AA	AG	AG	AG	AA	AG	GG	AA	AA	NN	AA	AG	AA
28203401|F|0-17:C>T-17:C>T	C/T	VU02	23897479	+	NA	NA	NA	NA	NA	NA	CC	CC	CC	CC	CC	CC	CC	CC	CC	CC	CC	CC	CC	CC	NN	CC	CT	CC	CC	CC	CC	NN	TT	CC	CC	CC	CC	CC	CC	CC	CC	CC	CC	NN	TT	NN	CC	CC	CC
14087613|F|0-6:A>G-6:A>G	G/A	VU02	23971028	+	NA	NA	NA	NA	NA	NA	GG	AG	GG	GG	NN	AA	GG	NN	GG	AA	AG	AA	AA	AA	AA	AA	AG	AG	GG	AG	AG	AG	AG	NN	NN	AA	GG	GG	GG	GG	NN	GG	AA	AG	AG	AG	GG	AG	GG
14087615|F|0-15:C>T-15:C>T	T/C	VU02	23971028	+	NA	NA	NA	NA	NA	NA	TT	TT	TT	CT	NN	CC	CT	NN	TT	CC	TT	CC	CC	CC	CC	CC	TT	TT	CT	TT	TT	CT	TT	NN	NN	CC	TT	CT	CT	CT	NN	CT	CC	TT	TT	TT	TT	TT	TT
14087606|F|0-31:G>T-31:G>T	G/T	VU02	23972199	+	NA	NA	NA	NA	NA	NA	GG	NN	GG	GG	TT	GG	GG	TT	GG	GG	GG	GG	GG	GG	GG	GG	GT	GG	GG	GG	GG	GG	TT	TT	TT	GG	GG	GG	GG	GG	TT	GG	GG	TT	TT	NN	GG	GG	GG
14087608|F|0-8:T>C-8:T>C	C/T	VU02	23972199	+	NA	NA	NA	NA	NA	NA	TT	TT	TT	CC	NN	CC	CC	NN	TT	CC	CC	CC	CC	CC	CC	CC	TT	CC	CC	TT	CC	CC	NN	NN	NN	CC	TT	CC	CC	CC	NN	CC	CC	NN	NN	NN	TT	CC	TT
14080342|F|0-44:A>G-44:A>G	A/G	VU02	23981714	+	NA	NA	NA	NA	NA	NA	AA	GG	AA	AA	AA	AG	AA	AA	AA	AA	AA	AA	AA	AA	AA	AA	AG	AA	AA	AA	AA	AA	AA	AA	AA	AA	AA	AA	AA	AA	AA	AA	AA	AA	AA	AA	AA	AA	AA
14075048|F|0-49:A>T-49:A>T	A/T	VU02	23982423	+	NA	NA	NA	NA	NA	NA	AA	NN	AA	AA	TT	AA	AA	TT	AA	AA	TT	AA	AA	AA	AA	AA	AA	TT	AA	AA	TT	AA	AA	TT	TT	AA	AA	AA	AA	AA	TT	AA	NN	AA	AA	TT	AA	TT	AA
14075264|F|0-60:A>G-60:A>G	A/G	VU02	23984870	+	NA	NA	NA	NA	NA	NA	AA	AA	AA	AA	AG	AA	AA	GG	AA	AA	AA	AA	AA	AA	AA	AA	AA	AA	AA	AA	AA	NN	AA	GG	GG	AA	AA	AA	AA	AA	GG	AA	NN	NN	AA	AA	AA	AA	AA
14082373|F|0-15:A>G-15:A>G	A/G	VU02	24021134	+	NA	NA	NA	NA	NA	NA	AA	AA	AA	AA	AA	AA	AA	AA	AG	AA	GG	AA	AA	AA	AA	AA	AG	NN	AA	NN	NN	AA	GG	AG	AA	AA	AA	AA	AA	AA	AA	AA	AA	GG	GG	NN	AA	NN	AA
14060085|F|0-36:A>T-36:A>T	A/T	VU02	24021200	+	NA	NA	NA	NA	NA	NA	AA	AA	AA	AA	AA	AA	AA	AA	AA	AA	AA	AA	AA	AA	AA	AA	AA	NN	AA	NN	NN	AA	AA	AA	AA	AA	AA	AA	AA	AA	AA	AA	AA	AA	AA	NN	AA	NN	AA
35153326|F|0-68:A>C-68:A>C	C/A	VU02	24038066	+	NA	NA	NA	NA	NA	NA	AA	CC	CC	CC	AA	CC	CC	AA	CC	CC	CC	CC	CC	CC	CC	CC	CC	CC	CC	CC	CC	CC	CC	AC	AA	CC	CC	CC	CC	CC	AA	CC	CC	CC	CC	CC	CC	CC	CC
14083758|F|0-35:G>C-35:G>C	G/C	VU02	24057413	+	NA	NA	NA	NA	NA	NA	GC	GG	GG	GG	GC	GG	GG	GC	GG	GG	NN	GG	GG	GG	GG	GG	GC	GC	GG	GC	GC	GG	GG	GC	GC	GG	GG	GG	GG	GG	GC	GG	GG	NN	NN	GC	GG	GC	GG
14086157|F|0-29:G>C-29:G>C	C/G	VU02	24057457	+	NA	NA	NA	NA	NA	NA	CC	CC	CC	CC	CC	CC	CC	CC	CC	CC	NN	GG	CC	CC	GG	CC	CC	CC	CC	CC	CC	CC	CC	CC	CC	CC	CC	CC	CC	CC	CC	CC	GG	NN	NN	CC	CC	CC	CC
14086721|F|0-24:T>C-24:T>C	C/T	VU02	24058646	+	NA	NA	NA	NA	NA	NA	CC	CC	CC	CC	CC	CC	CC	CC	CC	CC	TT	CC	CC	CC	CC	CC	CC	CC	CC	CC	CC	CC	CC	CC	CC	CC	CC	CC	CC	CC	CC	CC	CC	TT	TT	CC	CC	CC	CC
14086151|F|0-53:A>T-53:A>T	A/T	VU02	24068286	+	NA	NA	NA	NA	NA	NA	AA	AA	AA	AA	AA	AA	AA	AA	AA	AA	TT	AA	AA	AA	AA	AA	AA	AA	AA	AA	AA	AA	AA	AA	AA	AA	AA	AA	AA	AA	AA	AA	AA	TT	TT	AA	AA	AA	AA
14074890|F|0-54:C>T-54:C>T	T/C	VU02	24089363	+	NA	NA	NA	NA	NA	NA	CC	TT	TT	TT	CC	TT	TT	CC	TT	TT	CC	TT	TT	TT	TT	TT	CT	CC	TT	CT	CC	TT	TT	CT	CC	TT	TT	TT	TT	TT	CC	TT	CT	CC	CC	CC	TT	CC	TT
14086603|F|0-57:T>G-57:T>G	T/G	VU02	24148595	+	NA	NA	NA	NA	NA	NA	TT	TT	TT	TT	TT	TT	TT	TT	TT	TT	GG	TT	TT	TT	TT	TT	TT	TT	TT	TT	TT	TT	TT	TT	TT	TT	TT	TT	TT	TT	TT	TT	TT	GG	NN	TT	TT	TT	TT
14073683|F|0-21:G>T-21:G>T	G/T	VU02	24150206	+	NA	NA	NA	NA	NA	NA	TT	GG	GG	GG	TT	GG	GG	NN	GG	GG	GG	GG	GG	GG	GG	GG	TT	TT	GG	TT	TT	GG	GG	GG	TT	GG	GG	GG	GG	GG	TT	GG	GG	GG	GG	TT	NN	TT	GG
14086315|F|0-33:G>T-33:G>T	G/T	VU02	24218370	+	NA	NA	NA	NA	NA	NA	TT	GG	TT	GG	TT	GG	GG	TT	GG	GG	GG	GG	GG	GG	GG	GG	GT	TT	GG	TT	TT	GG	GG	GT	TT	GG	TT	GG	GG	GG	TT	GG	GG	TT	GG	TT	GG	TT	GG
14075965|F|0-63:T>C-63:T>C	C/T	VU02	24218685	+	NA	NA	NA	NA	NA	NA	CC	CC	CC	CC	CC	TT	CC	CC	CC	TT	CC	CC	TT	CC	CC	TT	CC	CC	CC	CC	CC	CC	TT	CC	CC	TT	CC	CC	CC	CC	CC	CC	CC	CC	CC	CC	CC	CC	CC
14087730|F|0-20:A>G-20:A>G	A/G	VU02	24218907	+	NA	NA	NA	NA	NA	NA	GG	AA	GG	AA	NN	AA	AA	NN	AA	AA	AA	AA	AA	AA	AA	AA	AG	GG	AA	GG	GG	AA	AA	AA	NN	AA	GG	AA	AA	AA	AA	AA	AA	GG	AA	GG	AA	GG	AA
14087730|F|0-25:C>T-25:C>T	C/T	VU02	24218907	+	NA	NA	NA	NA	NA	NA	CC	CC	NN	CC	NN	CC	CC	NN	CC	CC	CC	CC	CC	CC	CC	CC	CC	NN	CC	NN	NN	CC	CC	CC	NN	CC	NN	CC	CC	CC	CT	CC	CC	TT	CC	NN	CC	NN	CC
14087730|F|0-57:A>G-57:A>G	A/G	VU02	24218907	+	NA	NA	NA	NA	NA	NA	AG	AG	GG	AA	GG	AA	AA	GG	AA	AA	AG	AA	AA	AA	AA	AA	AA	GG	AA	GG	GG	AA	AA	AG	GG	AA	GG	AA	AA	AA	AA	AA	AA	NN	AG	NN	AG	GG	AA
14087730|F|0-67:T>C-67:T>C	T/C	VU02	24218907	+	NA	NA	NA	NA	NA	NA	TT	TT	NN	TT	NN	TT	TT	NN	TT	TT	TT	TT	TT	TT	TT	TT	TT	NN	TT	NN	NN	TT	TT	TT	NN	TT	NN	TT	TT	TT	TT	TT	TT	NN	TT	NN	TT	NN	TT
14055827|F|0-21:C>A-21:C>A	C/A	VU02	24229046	+	NA	NA	NA	NA	NA	NA	CC	CC	CC	CC	CC	CC	CC	CC	CC	CC	NN	CC	CC	CC	CC	CC	CC	CC	CC	CC	CC	CC	CC	CC	CC	CC	CC	CC	CC	CC	CC	CC	CC	CC	CC	CC	AA	CC	CC
14083518|F|0-9:C>T-9:C>T	T/C	VU02	24230708	+	NA	NA	NA	NA	NA	NA	CC	CC	CC	CC	CC	CC	CC	CC	TT	TT	CC	TT	TT	CC	TT	TT	CT	CC	CC	CC	CC	CC	TT	CT	CC	TT	CC	CC	CC	TT	CC	TT	TT	CC	CC	CC	CC	CC	TT
14083083|F|0-32:C>A-32:C>A	A/C	VU02	24230761	+	NA	NA	NA	NA	NA	NA	AA	AA	AA	NN	AA	NN	NN	AA	AA	AA	AA	AA	AA	NN	AA	AA	AA	AA	NN	AA	AA	AA	AA	AA	AA	AA	AA	NN	NN	AA	AA	AA	AA	AA	CC	AA	AA	AA	AA
28203177|F|0-12:A>C-12:A>C	C/A	VU02	24230761	+	NA	NA	NA	NA	NA	NA	CC	CC	CC	AA	CC	AA	AA	CC	CC	CC	CC	CC	CC	AA	CC	CC	AC	CC	AA	CC	CC	AC	CC	CC	CC	CC	CC	AA	AA	CC	CC	CC	CC	CC	NN	CC	CC	CC	CC
14082865|F|0-58:G>C-58:G>C	C/G	VU02	24230931	+	NA	NA	NA	NA	NA	NA	GG	GG	GG	GG	GG	GG	GG	GG	CC	CC	GG	CC	CC	CC	CC	CC	GC	GG	GG	GG	GG	GC	CC	GC	GG	CC	GG	GG	GG	CC	GG	CC	CC	GG	GG	GG	GG	GG	CC
25353453|F|0-18:A>G-18:A>G	A/G	VU02	24245957	+	NA	NA	NA	NA	NA	NA	AA	AA	AA	AA	AA	AA	AA	AA	AA	AA	AA	AA	AA	AA	AA	AA	AG	AA	AA	AA	AA	AA	AA	AA	AA	AA	AA	AA	AA	AA	AA	AA	AA	AA	AA	AA	AA	AA	AA
25355233|F|0-52:G>A-52:G>A	G/A	VU02	24246023	+	NA	NA	NA	NA	NA	NA	GG	GG	GG	AA	GG	AA	AA	GG	GG	GG	GG	GG	GG	AA	GG	GG	AG	GG	AA	GG	GG	AA	GG	GG	GG	GG	GG	AA	AA	GG	GG	GG	GG	GG	GG	GG	GG	GG	GG
14082020|F|0-18:A>G-18:A>G	A/G	VU02	24307709	+	NA	NA	NA	NA	NA	NA	AA	AA	AA	AA	NN	AA	AA	NN	AA	AA	AA	AA	AA	AA	AA	AA	AA	AA	AA	AA	AA	AA	GG	GG	NN	AA	AA	AA	AA	AA	AA	AA	AA	AA	AA	AA	AA	AA	AA
14082020|F|0-29:C>T-29:C>T	C/T	VU02	24307709	+	NA	NA	NA	NA	NA	NA	CC	CC	CC	CC	TT	CC	CC	TT	CC	CC	CC	CC	CC	CC	CC	CC	CC	CC	CC	CC	CC	CC	NN	TT	TT	CC	CC	CC	CC	CC	CC	CC	CC	CC	CC	CC	CC	CC	CC
25362897|F|0-61:A>T-61:A>T	A/T	VU02	24310500	+	NA	NA	NA	NA	NA	NA	AA	AA	AA	TT	AA	AA	TT	AA	AA	AA	AA	AA	AA	AA	AA	AA	AA	AA	AT	AA	AA	AA	NN	AA	AA	AA	AA	TT	AA	AA	AA	AA	AA	AA	AA	NN	AA	AA	AA
28203147|F|0-9:A>G-9:A>G	A/G	VU02	24330147	+	NA	NA	NA	NA	NA	NA	AA	AA	NN	AA	AA	AA	AA	AA	GG	AA	AA	AA	AA	AA	AA	AA	NN	AA	AA	AA	AA	NN	GG	AA	AA	AA	NN	AA	NN	NN	NN	NN	AA	AA	GG	NN	NN	NN	NN
35154531|F|0-6:A>T-6:A>T	T/A	VU02	24345564	+	NA	NA	NA	NA	NA	NA	AA	AA	AA	TT	AA	AA	TT	AA	AA	TT	TT	TT	TT	TT	TT	TT	AT	AA	TT	AA	AA	TT	AA	AA	AA	TT	AA	NN	NN	TT	AA	TT	NN	AA	AA	AA	AA	NN	TT
100046313|F|0-14:C>A-14:C>A	C/A	VU02	24345630	+	NA	NA	NA	NA	NA	NA	CC	CC	CC	CC	CC	CC	CC	CC	CC	CC	CC	CC	CC	CC	CC	CC	CC	CC	CC	CC	CC	CC	CC	CC	NN	CC	NN	CC	CC	CC	CC	CC	CC	NN	CC	NN	CC	CC	CC
14085280|F|0-10:G>A-10:G>A	A/G	VU02	24352920	+	NA	NA	NA	NA	NA	NA	GG	GG	GG	AG	GG	GG	AA	GG	AA	AA	AA	AA	AA	AA	AA	AA	AA	GG	AA	GG	GG	AA	NN	GG	GG	AA	GG	AA	AA	AA	GG	AA	AA	GG	NN	GG	NN	AA	AA
14074163|F|0-32:T>C-32:T>C	T/C	VU02	24354301	+	NA	NA	NA	NA	NA	NA	CC	CC	CC	TT	CC	CC	TT	CC	TT	TT	TT	TT	TT	TT	TT	TT	TT	CC	TT	CC	CC	TT	TT	CT	CC	TT	CC	TT	TT	TT	CC	TT	TT	CC	TT	NN	TT	TT	CT
35154554|F|0-31:T>C-31:T>C	T/C	VU02	24372506	+	NA	NA	NA	NA	NA	NA	CC	CC	TT	TT	CC	CC	TT	CC	NN	TT	TT	TT	TT	TT	TT	TT	TT	CC	TT	CC	CC	TT	NN	CC	CC	TT	CC	TT	TT	TT	CC	TT	TT	CC	NN	NN	NN	TT	TT
14082331|F|0-24:C>T-24:C>T	C/T	VU02	24388158	+	NA	NA	NA	NA	NA	NA	CC	CC	CC	CC	CC	CC	CC	CC	TT	CC	CC	CC	CC	CC	CC	CC	CT	CC	CC	CC	CC	CC	CC	CC	CC	CC	CC	CC	CC	CC	CC	CC	CC	CC	TT	CC	TT	CC	TT
14074899|F|0-15:T>G-15:T>G	T/G	VU02	24419510	+	NA	NA	NA	NA	NA	NA	TT	TT	TT	TT	TT	TT	TT	TT	TT	GG	TT	TT	TT	TT	TT	TT	TT	TT	TT	TT	TT	TT	TT	TT	TT	TT	TT	TT	TT	TT	TT	TT	TT	TT	NN	TT	TT	TT	TT
14074899|F|0-63:G>A-63:G>A	G/A	VU02	24419510	+	NA	NA	NA	NA	NA	NA	GG	GG	GG	GG	GG	GG	GG	GG	AG	NN	AG	GG	GG	GG	GG	GG	AG	GG	GG	GG	GG	GG	GG	GG	AG	GG	GG	GG	GG	GG	GG	GG	GG	GG	AA	GG	AG	GG	AG
14083728|F|0-35:G>A-35:G>A	A/G	VU02	24419861	+	NA	NA	NA	NA	NA	NA	AA	AA	AA	AA	AA	AA	AA	AA	AG	AA	GG	AA	AA	AA	AA	AA	AG	AA	AA	AA	AA	AA	AA	AA	AA	AA	AA	AA	AA	AA	AA	AA	AA	AA	GG	AA	GG	AA	GG
14075881|F|0-67:G>A-67:G>A	A/G	VU02	24419918	+	NA	NA	NA	NA	NA	NA	AA	AA	AA	AA	AA	AA	AA	AA	GG	AA	GG	AA	AA	AA	AA	AA	AG	AA	AA	AA	AA	AA	AA	AA	AA	AA	AA	AA	AA	AA	AA	AA	AA	AA	GG	AA	GG	AA	GG
35154076|F|0-21:A>G-21:A>G	G/A	VU02	24465563	+	NA	NA	NA	NA	NA	NA	GG	AA	GG	GG	GG	GG	GG	GG	AA	GG	AA	GG	GG	GG	GG	GG	AA	GG	GG	GG	GG	GG	GG	GG	GG	GG	GG	GG	GG	GG	GG	GG	GG	GG	AA	NN	AA	GG	AA
14082099|F|0-45:A>C-45:A>C	C/A	VU02	24471050	+	NA	NA	NA	NA	NA	NA	CC	AA	CC	CC	CC	CC	CC	CC	AA	NN	AA	CC	CC	CC	CC	CC	AA	CC	CC	CC	CC	CC	CC	CC	CC	CC	CC	CC	CC	CC	CC	CC	NN	CC	AA	CC	AA	CC	AA
14082100|F|0-17:C>G-17:C>G	C/G	VU02	24471050	+	NA	NA	NA	NA	NA	NA	CC	NN	CC	CC	CC	CC	CC	CC	GG	GG	NN	CC	CC	CC	CC	CC	GG	CC	CC	CC	CC	GC	CC	CC	CC	CC	GC	CC	CC	GC	CC	CC	NN	CC	NN	CC	NN	CC	NN
14082100|F|0-66:T>A-66:T>A	T/A	VU02	24471050	+	NA	NA	NA	NA	NA	NA	TT	NN	TT	TT	TT	TT	TT	TT	NN	NN	NN	TT	TT	TT	TT	TT	NN	TT	TT	TT	TT	TT	TT	TT	TT	TT	TT	TT	TT	TT	TT	TT	AA	TT	NN	TT	NN	TT	NN
14085575|F|0-34:T>C-34:T>C	C/T	VU02	24474688	+	NA	NA	NA	NA	NA	NA	CC	TT	CC	CC	CC	CC	CC	CC	TT	CC	TT	CC	CC	CC	CC	CC	TT	CC	CC	CC	CC	CC	CC	CC	CC	CC	CC	CC	CC	CC	CC	CC	CC	CC	TT	CC	TT	CC	TT
35154623|F|0-48:C>A-48:C>A	A/C	VU02	24484960	+	NA	NA	NA	NA	NA	NA	AA	NN	AA	AA	AA	AA	AA	AA	NN	CC	NN	AA	AA	AA	AA	AA	AA	AA	AA	AA	AA	AA	AA	NN	AA	AA	NN	AA	AA	AA	AA	AA	AA	AA	NN	NN	AA	AA	NN
35154623|F|0-52:G>C-52:G>C	G/C	VU02	24484960	+	NA	NA	NA	NA	NA	NA	GG	CC	GG	GG	GG	GG	GG	GG	CC	NN	CC	GG	GG	GG	GG	GG	GC	GG	GG	GG	GG	GG	GG	NN	GG	GG	NN	GG	GG	GG	GG	GG	GG	GG	CC	NN	GG	GG	CC
14082580|F|0-40:C>T-40:C>T	C/T	VU02	24499473	+	NA	NA	NA	NA	NA	NA	CC	TT	CC	CC	CC	CC	CC	CC	TT	CC	TT	CC	CC	CC	CC	CC	CT	CC	CC	CC	CC	CC	CC	CC	CC	CC	CC	CC	CC	CC	CC	CC	CC	CC	TT	CC	TT	CC	TT
42215826|F|0-25:C>G-25:C>G	C/G	VU02	24503198	+	NA	NA	NA	NA	NA	NA	CC	CC	CC	NN	CC	CC	NN	NN	CC	CC	CC	CC	CC	CC	CC	CC	GC	CC	CC	CC	CC	CC	NN	NN	CC	CC	NN	NN	CC	CC	CC	NN	CC	CC	CC	CC	CC	NN	CC
42215826|F|0-64:C>A-64:C>A	C/A	VU02	24503198	+	NA	NA	NA	NA	NA	NA	CC	CC	CC	AA	CC	CC	AA	NN	CC	CC	CC	CC	CC	CC	CC	CC	CC	CC	AC	CC	CC	CC	NN	NN	CC	CC	NN	AA	CC	CC	CC	NN	CC	CC	CC	CC	CC	NN	CC
14073453|F|0-65:T>A-65:T>A	T/A	VU02	24569540	+	NA	NA	NA	NA	NA	NA	TT	TT	TT	TT	TT	TT	TT	TT	AT	TT	TT	TT	TT	TT	TT	TT	AT	TT	TT	TT	TT	TT	TT	TT	TT	TT	TT	TT	TT	TT	TT	TT	TT	TT	TT	TT	TT	TT	TT
14087262|F|0-50:C>T-50:C>T	C/T	VU02	24569606	+	NA	NA	NA	NA	NA	NA	CC	TT	CC	CC	CC	CC	CC	CC	CC	CC	TT	CC	CC	CC	CC	CC	TT	CC	CC	CC	CC	CC	CC	CC	CC	CC	CC	CC	CC	CC	CC	CC	CC	CC	TT	CC	TT	CC	TT
14081625|F|0-63:A>G-63:A>G	A/G	VU02	24620995	+	NA	NA	NA	NA	NA	NA	AA	GG	AA	AA	AA	AA	AA	AA	AG	AA	AA	AA	AA	AA	AA	AA	GG	AA	AA	AA	AA	AA	AA	AA	AA	AA	AA	AA	AA	AA	AA	AA	AA	AA	AA	AA	GG	AA	GG
14076244|F|0-36:A>T-36:A>T	A/T	VU02	24621061	+	NA	NA	NA	NA	NA	NA	AA	NN	AA	AA	AA	AA	AA	AA	AA	AA	AA	AA	AA	AA	AA	AA	TT	AA	AA	AA	AA	AA	AA	AA	AA	AA	AA	AA	AA	AA	AA	AA	AA	AA	AA	NN	NN	AA	NN
14076244|F|0-8:A>G-8:A>G	A/G	VU02	24621061	+	NA	NA	NA	NA	NA	NA	AA	GG	AA	AA	AA	AA	AA	AA	AA	AA	AA	AA	AA	AA	AA	AA	GG	AA	AA	AA	AA	AA	AA	AA	AA	AA	AA	AA	AA	AA	AA	AA	AA	AA	AA	NN	GG	AA	GG
14078624|F|0-39:G>T-39:G>T	G/T	VU02	24635901	+	NA	NA	NA	NA	NA	NA	GG	GG	GG	GG	GG	GG	GG	GG	GG	GG	GG	GG	GG	GG	GG	GG	GT	GG	GG	GG	GG	GG	GG	GG	GG	GG	GG	GG	GG	GG	GG	GG	GG	GG	GG	GG	TT	GG	GG
28202883|F|0-19:A>T-19:A>T	T/A	VU02	24698916	+	NA	NA	NA	NA	NA	NA	TT	TT	AA	TT	TT	TT	TT	TT	AT	TT	TT	TT	TT	TT	TT	TT	AT	TT	TT	TT	TT	TT	TT	TT	TT	TT	TT	TT	TT	TT	TT	TT	TT	TT	TT	AA	TT	TT	NN
28203029|F|0-24:G>A-24:G>A	A/G	VU02	24708390	+	NA	NA	NA	NA	NA	NA	AA	AA	GG	AA	AA	AA	AA	AA	AA	AA	AA	AA	AA	AA	AA	AA	AG	AA	AA	AA	AA	NN	AA	NN	NN	NN	NN	AA	AA	NN	AA	NN	NN	AA	AA	GG	AA	AA	AA
35153657|F|0-11:T>C-11:T>C	C/T	VU02	24718788	+	NA	NA	NA	NA	NA	NA	CC	CC	CC	CC	CC	CC	CC	CC	CC	CC	CC	CC	CC	CC	CC	CC	CC	CC	CC	CC	CC	CC	CC	CC	CC	CC	CC	CC	CC	CC	CC	NN	CC	CC	CC	CC	TT	CC	CC
14073609|F|0-14:A>G-14:A>G	A/G	VU02	24757360	+	NA	NA	NA	NA	NA	NA	AA	GG	AA	AA	AA	AA	AA	AA	AA	AA	AA	AA	AA	AA	AA	AA	AA	AA	AA	AA	AA	AA	AA	AA	AA	AA	AA	AA	AA	AA	AA	AA	AA	AA	AA	AA	AA	AA	AA
35155148|F|0-19:T>A-19:T>A	T/A	VU02	24761220	+	NA	NA	NA	NA	NA	NA	NN	TT	TT	TT	TT	TT	TT	TT	TT	TT	TT	TT	TT	AA	TT	NN	TT	TT	TT	NN	TT	TT	TT	NN	NN	TT	TT	TT	TT	NN	TT	TT	TT	TT	TT	NN	NN	NN	TT
14073920|F|0-33:A>G-33:A>G	A/G	VU02	24785963	+	NA	NA	NA	NA	NA	NA	AA	AA	AA	AA	AA	AA	AA	AA	AG	AA	GG	AA	AA	AA	AA	AA	AG	AA	AA	AA	AA	AA	AA	AA	GG	AA	AA	AA	AA	AA	AA	AA	AA	AA	GG	AA	AA	AA	AA
14083051|F|0-16:C>A-16:C>A	A/C	VU02	24801772	+	NA	NA	NA	NA	NA	NA	NN	CC	AA	CC	AA	CC	CC	CC	CC	AA	CC	AA	AA	AA	AA	AA	CC	NN	CC	NN	NN	AA	AA	CC	CC	AA	CC	CC	AA	AA	CC	AA	AA	AA	CC	NN	CC	AA	CC
14073985|F|0-29:T>G-29:T>G	G/T	VU02	24825075	+	NA	NA	NA	NA	NA	NA	GG	TT	GG	GG	GG	TT	GG	TT	TT	GG	TT	GG	GG	GG	GG	GG	TT	TT	GG	GG	TT	GG	GG	GT	TT	GG	TT	GG	GG	GG	TT	GG	GG	GG	TT	GG	TT	GG	TT
35153941|F|0-15:A>G-15:A>G	A/G	VU02	24826094	+	NA	NA	NA	NA	NA	NA	AA	GG	AA	AA	AA	GG	AA	GG	GG	AA	GG	AA	AA	AA	AA	AA	GG	GG	AA	AA	GG	AA	AA	GG	GG	AA	GG	AA	AA	AA	GG	AA	AA	AA	GG	NN	GG	AA	GG
14085478|F|0-12:A>G-12:A>G	G/A	VU02	24826229	+	NA	NA	NA	NA	NA	NA	GG	AA	GG	GG	GG	AA	GG	AA	AA	GG	AA	GG	GG	GG	GG	GG	AA	AA	GG	GG	AA	GG	GG	AG	AA	GG	AA	GG	GG	GG	AA	GG	GG	GG	AA	GG	AA	GG	AA
35153885|F|0-29:C>A-29:C>A	C/A	VU02	24836849	+	NA	NA	NA	NA	NA	NA	CC	AA	CC	NN	NN	AA	NN	AA	NN	CC	AA	CC	CC	CC	CC	CC	NN	AA	NN	CC	AA	CC	CC	AC	AA	NN	NN	NN	CC	CC	AA	NN	CC	CC	AA	NN	NN	NN	AA
14085170|F|0-42:C>A-42:C>A	C/A	VU02	24847423	+	NA	NA	NA	NA	NA	NA	CC	AA	CC	CC	CC	AA	CC	AA	AC	CC	AA	CC	CC	CC	CC	CC	AA	AA	CC	CC	AA	CC	CC	AC	AA	CC	AA	CC	CC	CC	AA	CC	CC	CC	AA	CC	CC	CC	AA
14086137|F|0-9:G>T-9:G>T	G/T	VU02	24989932	+	NA	NA	NA	NA	NA	NA	GG	TT	GG	NN	GG	GG	NN	NN	TT	GG	TT	GG	GG	GG	GG	GG	NN	NN	NN	GG	NN	GG	GG	GG	NN	GG	TT	NN	GG	GG	TT	GG	GG	GG	TT	NN	TT	GG	GG
42215929|F|0-52:A>G-52:A>G	A/G	VU02	24989998	+	NA	NA	NA	NA	NA	NA	AA	AA	AA	NN	AA	AA	NN	AA	AA	AA	AA	AA	GG	AA	AA	AA	AA	AA	NN	AA	AA	AA	AA	AA	NN	AA	AA	NN	AA	NN	AA	NN	AA	AA	AA	AA	AA	NN	NN
14076593|F|0-61:C>G-61:C>G	G/C	VU02	25033661	+	NA	NA	NA	NA	NA	NA	GG	CC	GG	GG	GG	GG	GG	CC	GG	GG	CC	GG	GG	GG	GG	GG	GC	CC	GG	GG	CC	GG	GG	GG	GG	GG	CC	GG	GG	GG	CC	GG	GG	GG	CC	GG	CC	GG	GG
14078731|F|0-28:C>T-28:C>T	C/T	VU02	25033727	+	NA	NA	NA	NA	NA	NA	TT	CC	TT	CC	TT	TT	CC	CC	CC	TT	CC	CC	TT	TT	CC	TT	CC	CC	CC	TT	CC	TT	TT	TT	TT	TT	CC	CC	CC	CC	CC	CC	CC	TT	CC	TT	CC	TT	TT
14084101|F|0-25:G>T-25:G>T	G/T	VU02	25044436	+	NA	NA	NA	NA	NA	NA	GG	GG	GG	GG	GG	GG	GG	GG	GT	GG	GG	GG	GG	GG	GG	GG	GG	GG	GG	GG	GG	GG	GG	GG	GG	GG	TT	GG	GG	GG	TT	GG	GG	GG	GG	GG	TT	GG	GG
14079277|F|0-9:T>C-9:T>C	C/T	VU02	25066725	+	NA	NA	NA	NA	NA	NA	CC	TT	NN	TT	TT	NN	TT	TT	TT	CC	TT	CC	CC	CC	TT	CC	CT	TT	TT	NN	TT	CC	CC	CC	CC	CC	TT	TT	CC	CC	TT	CC	TT	CC	TT	NN	TT	CC	NN
35154817|F|0-13:C>T-13:C>T	C/T	VU02	25076903	+	NA	NA	NA	NA	NA	NA	TT	TT	NN	TT	TT	NN	TT	CC	NN	CC	TT	CC	CC	CC	TT	CC	CC	TT	NN	NN	TT	NN	CC	NN	CC	CC	TT	TT	NN	CC	TT	CC	TT	NN	NN	NN	CT	CC	NN
14073415|F|0-19:T>C-19:T>C	T/C	VU02	25084851	+	NA	NA	NA	NA	NA	NA	CT	TT	TT	TT	NN	TT	TT	TT	TT	CT	TT	TT	TT	TT	TT	TT	TT	TT	TT	TT	TT	TT	TT	TT	TT	TT	CC	TT	TT	TT	CC	TT	TT	TT	TT	TT	CC	TT	TT
14083612|F|0-7:C>A-7:C>A	C/A	VU02	25114828	+	NA	NA	NA	NA	NA	NA	NN	CC	AA	CC	AA	CC	CC	CC	AA	CC	CC	CC	CC	CC	CC	CC	CC	CC	CC	AA	CC	CC	CC	AC	CC	CC	NN	CC	CC	CC	CC	CC	CC	CC	CC	AA	CC	AA	AA
42215865|F|0-31:G>A-31:G>A	G/A	VU02	25116798	+	NA	NA	NA	NA	NA	NA	AA	GG	GG	GG	GG	GG	GG	GG	GG	GG	GG	GG	GG	GG	GG	GG	GG	GG	GG	GG	GG	NN	GG	AG	NN	GG	AA	GG	GG	GG	AA	GG	GG	GG	GG	NN	GG	NN	GG
28497717|F|0-14:C>A-14:C>A	C/A	VU02	25136470	+	NA	NA	NA	NA	NA	NA	NN	AA	NN	CC	NN	AA	CC	CC	AA	CC	AA	CC	CC	CC	CC	CC	AA	AA	CC	NN	AA	CC	CC	CC	CC	CC	NN	CC	CC	CC	NN	CC	CC	AA	AA	NN	CC	NN	NN
35152895|F|0-52:C>T-52:C>T	T/C	VU02	25161213	+	NA	NA	NA	NA	NA	NA	TT	TT	CC	TT	TT	CT	TT	TT	CT	TT	TT	TT	TT	TT	TT	TT	TT	TT	TT	CC	TT	TT	TT	CC	TT	TT	TT	TT	TT	TT	CC	TT	TT	TT	TT	NN	TT	CC	CC
35153490|F|0-67:A>T-67:A>T	T/A	VU02	25171162	+	NA	NA	NA	NA	NA	NA	AA	AA	AA	AA	AA	AA	AA	NN	AA	TT	AA	TT	TT	TT	TT	TT	AA	AA	NN	AA	AA	NN	TT	NN	TT	NN	AA	AA	NN	TT	AA	TT	TT	NN	NN	NN	AA	NN	AA
14075859|F|0-37:G>A-37:G>A	A/G	VU02	25171228	+	NA	NA	NA	NA	NA	NA	AA	AA	GG	AA	AA	AA	AA	AA	AG	AA	AA	AA	AA	AA	AA	AA	AA	AA	AA	GG	AA	AA	AA	AG	AA	AA	AA	AA	AG	AA	GG	AA	AA	AA	AA	GG	AA	GG	GG
14075859|F|0-68:G>C-68:G>C	G	VU02	25171228	+	NA	NA	NA	NA	NA	NA	GG	GG	NN	GG	GG	GG	GG	GG	GG	GG	GG	GG	GG	GG	GG	GG	GG	GG	GG	NN	GG	GG	GG	GG	GG	GG	GG	GG	GG	GG	NN	GG	GG	GG	GG	NN	GG	NN	NN
35153650|F|0-11:G>C-11:G>C	G/C	VU02	25184014	+	NA	NA	NA	NA	NA	NA	CC	CC	CC	NN	CC	CC	NN	NN	CC	GG	CC	GG	NN	GG	GG	GG	GC	CC	NN	CC	CC	GG	GG	GC	NN	GG	CC	NN	NN	GG	CC	GG	GG	NN	NN	NN	GG	NN	CC
35153387|F|0-42:T>C-42:T>C	T/C	VU02	25191698	+	NA	NA	NA	NA	NA	NA	CC	CC	TT	TT	TT	TT	TT	NN	NN	TT	TT	TT	TT	TT	TT	TT	TT	TT	TT	TT	TT	TT	TT	TT	TT	TT	CC	TT	TT	TT	CC	TT	TT	TT	TT	TT	TT	TT	TT
35153387|F|0-7:C>A-7:C>A	C/A	VU02	25191698	+	NA	NA	NA	NA	NA	NA	NN	NN	CC	CC	CC	CC	CC	NN	NN	CC	CC	AC	CC	CC	CC	CC	CC	CC	CC	CC	CC	CC	CC	CC	CC	CC	NN	CC	CC	CC	NN	CC	CC	CC	CC	CC	CC	CC	CC
25354479|F|0-47:C>A-47:C>A	C/A	VU02	25270202	+	NA	NA	NA	NA	NA	NA	AA	CC	CC	CC	CC	CC	CC	CC	CC	CC	CC	CC	CC	CC	CC	CC	CC	CC	CC	CC	CC	CC	CC	CC	CC	CC	AA	CC	CC	CC	AA	CC	CC	AA	CC	CC	CC	CC	CC
14075662|F|0-26:C>T-26:C>T	C/T	VU02	25272024	+	NA	NA	NA	NA	NA	NA	CC	TT	CC	CC	CC	CC	CC	CC	CT	CC	CC	CC	CC	CC	CC	CC	CC	CC	CC	CC	CC	CC	CC	CC	CC	CC	CC	CC	CC	CC	CC	CC	CC	CC	CC	CC	CC	NN	CC
14087321|F|0-13:C>T-13:C>T	C/T	VU02	25287721	+	NA	NA	NA	NA	NA	NA	TT	TT	TT	CC	CC	CC	CC	CC	TT	CC	TT	CC	CC	CC	CC	CC	CC	TT	CC	TT	TT	CC	CC	CT	CC	CC	TT	CC	CC	CC	TT	CC	CC	CC	TT	TT	CC	TT	TT
14083546|F|0-35:T>C-35:T>C	T/C	VU02	25287787	+	NA	NA	NA	NA	NA	NA	TT	TT	TT	TT	TT	TT	TT	TT	TT	TT	TT	TT	TT	TT	TT	TT	TT	TT	TT	TT	TT	TT	TT	TT	TT	TT	CC	TT	TT	TT	TT	TT	TT	CC	TT	TT	TT	TT	TT
35154484|F|0-19:G>A-19:G>A	G/A	VU02	25288109	+	NA	NA	NA	NA	NA	NA	AA	AA	AA	GG	NN	NN	GG	GG	AA	GG	AA	GG	GG	GG	GG	NN	GG	AA	GG	AA	AA	GG	GG	AG	GG	GG	AA	GG	GG	GG	AA	NN	GG	GG	AA	NN	GG	AA	AA
14081603|F|0-29:G>A-29:G>A	G/A	VU02	25323899	+	NA	NA	NA	NA	NA	NA	GG	AA	GG	GG	GG	GG	GG	GG	AG	GG	GG	GG	GG	GG	AA	GG	GG	GG	GG	GG	GG	GG	GG	GG	GG	GG	GG	GG	GG	GG	GG	GG	AA	NN	GG	GG	GG	GG	AA
25363131|F|0-38:A>G-38:A>G	A/G	VU02	25328980	+	NA	NA	NA	NA	NA	NA	AA	AA	GG	AA	AA	AA	AA	AA	AA	AA	AA	AA	AA	AA	AA	AA	AA	AA	AA	GG	AA	AA	AA	AA	AA	AA	AA	AA	AA	AA	AA	AA	AA	AA	AA	GG	AA	AA	AA
14087093|F|0-57:G>C-57:G>C	C/G	VU02	25345843	+	NA	NA	NA	NA	NA	NA	CC	CC	CC	CC	NN	NN	CC	CC	CC	CC	GG	CC	CC	CC	CC	CC	CC	GG	CC	CC	GG	CC	CC	GC	CC	CC	CC	CC	CC	CC	GC	CC	CC	CC	GG	CC	CC	GG	CC
14087094|F|0-29:T>G-29:T>G	G/T	VU02	25345843	+	NA	NA	NA	NA	NA	NA	GG	GG	GG	GG	TT	TT	GG	GG	GG	GG	NN	GG	GG	GG	GG	GG	GG	NN	GG	GG	NN	GG	GG	GG	GG	GG	GG	GG	GG	GG	GG	GG	GG	GG	NN	GG	GG	NN	GG
25364635|F|0-30:A>G-30:A>G	A/G	VU02	25352029	+	NA	NA	NA	NA	NA	NA	AA	AA	AA	AA	GG	GG	AA	AA	AA	AA	AA	AA	AA	AA	AA	AA	AA	AA	AA	AA	AA	AA	AA	AA	AA	AA	AA	AA	AA	AA	AA	AA	AA	AA	AA	AA	AA	AA	AA
35154385|F|0-48:G>C-48:G>C	G/C	VU02	25401769	+	NA	NA	NA	NA	NA	NA	NN	GG	CC	GG	GG	GG	GG	GG	GG	GG	GG	GG	GG	NN	GG	GG	GG	GG	GG	GC	GG	GG	GG	GG	GG	GG	NN	GG	GG	GG	GG	GG	GG	GG	GG	CC	GG	GG	GG
14076848|F|0-10:G>A-10:G>A	A/G	VU02	25402908	+	NA	NA	NA	NA	NA	NA	GG	AA	AA	AA	GG	GG	AA	AA	AA	AA	GG	AA	AA	GG	AA	AA	AA	GG	AA	AA	GG	AA	AA	AG	AA	AA	GG	AA	AA	AA	GG	AA	AA	AA	GG	NN	AA	GG	AA
14081817|F|0-34:C>T-34:C>T	C/T	VU02	25441008	+	NA	NA	NA	NA	NA	NA	TT	CC	TT	CC	NN	NN	CC	CC	CC	CC	CC	CC	CC	CC	CC	CC	CC	CC	CC	CC	CC	CC	CC	CT	CC	CC	TT	CC	CC	CC	CC	CC	CC	CC	CC	CC	CC	CC	CC
14086218|F|0-24:C>G-24:C>G	G/C	VU02	25444113	+	NA	NA	NA	NA	NA	NA	NN	GG	NN	GG	GG	GG	GG	GG	GG	GG	CC	GG	GG	GG	GG	GG	GC	CC	GG	GG	CC	GG	CC	CC	GG	GG	NN	GG	GG	GG	CC	GG	GG	GG	CC	GG	GG	CC	GG
14086218|F|0-9:T>A-9:T>A	T/A	VU02	25444113	+	NA	NA	NA	NA	NA	NA	AA	TT	AA	TT	TT	TT	TT	TT	TT	TT	NN	TT	TT	TT	TT	TT	TT	NN	TT	TT	NN	TT	NN	NN	TT	TT	AA	TT	TT	TT	NN	TT	TT	TT	NN	TT	TT	NN	TT
42216055|F|0-15:C>T-15:C>T	T/C	VU02	25444113	+	NA	NA	NA	NA	NA	NA	NN	TT	NN	TT	TT	TT	TT	TT	TT	TT	NN	TT	TT	TT	TT	TT	TT	NN	TT	TT	NN	TT	NN	NN	TT	TT	NN	TT	TT	TT	NN	TT	TT	TT	NN	CT	TT	NN	TT
14073697|F|0-32:T>C-32:T>C	C/T	VU02	25461297	+	NA	NA	NA	NA	NA	NA	TT	CC	TT	CC	TT	TT	CC	CC	CC	CC	TT	CC	CC	CC	CC	CC	CT	TT	CC	CC	TT	CC	TT	TT	CC	NN	TT	CC	CC	CC	TT	CC	CC	CC	TT	CC	CC	TT	CC
14076574|F|0-42:T>C-42:T>C	C/T	VU02	25463051	+	NA	NA	NA	NA	NA	NA	TT	CC	TT	CC	CC	CC	CC	CC	CC	CC	TT	CC	CC	CC	CC	CC	CT	TT	CC	CC	TT	CC	TT	TT	CC	CC	TT	CC	CC	CC	TT	CC	CC	CC	TT	CC	CC	TT	CC
25363573|F|0-41:T>A-41:T>A	T/A	VU02	25466683	+	NA	NA	NA	NA	NA	NA	TT	TT	TT	TT	TT	TT	TT	TT	TT	TT	TT	TT	TT	TT	TT	TT	TT	TT	TT	TT	TT	TT	TT	TT	TT	AA	TT	TT	TT	TT	TT	TT	TT	TT	TT	TT	TT	TT	TT
25363573|F|0-65:C>A-65:C>A	C/A	VU02	25466683	+	NA	NA	NA	NA	NA	NA	CC	CC	CC	CC	CC	CC	CC	CC	CC	CC	CC	CC	CC	CC	CC	CC	CC	CC	CC	CC	CC	CC	CC	CC	CC	AA	CC	CC	CC	CC	CC	CC	CC	CC	CC	CC	CC	CC	CC
14076703|F|0-16:C>G-16:C>G	C/G	VU02	25500828	+	NA	NA	NA	NA	NA	NA	CC	CC	CC	NN	GG	GG	NN	CC	CC	CC	CC	NN	CC	CC	NN	CC	CC	CC	NN	GG	CC	CC	CC	CC	CC	CC	CC	NN	NN	CC	CC	NN	NN	CC	CC	GG	CC	CC	CC
14075572|F|0-58:T>G-58:T>G	T/G	VU02	25513668	+	NA	NA	NA	NA	NA	NA	TT	GG	TT	TT	TT	TT	TT	GG	GG	TT	TT	TT	TT	GG	TT	TT	GT	TT	TT	TT	TT	TT	TT	TT	TT	TT	TT	TT	NN	TT	TT	TT	TT	TT	TT	TT	GG	TT	GG
14074540|F|0-51:A>T-51:A>T	A/T	VU02	25515344	+	NA	NA	NA	NA	NA	NA	AA	TT	AA	AA	AA	AA	AA	TT	TT	AA	AA	AA	AA	TT	AA	TT	AT	AA	AA	AA	AA	AT	AA	AA	TT	TT	AA	AA	AA	AA	AA	AA	AA	AA	AA	AA	TT	AA	TT
25363728|F|0-36:T>A-36:T>A	T/A	VU02	25515867	+	NA	NA	NA	NA	NA	NA	TT	TT	TT	TT	AA	AA	TT	TT	TT	TT	TT	TT	TT	TT	TT	TT	TT	TT	TT	TT	TT	TT	TT	TT	TT	TT	TT	TT	TT	TT	TT	TT	TT	TT	TT	TT	AT	TT	TT
14087114|F|0-34:T>C-34:T>C	T/C	VU02	25527866	+	NA	NA	NA	NA	NA	NA	TT	TT	TT	TT	TT	TT	TT	TT	TT	TT	TT	TT	TT	CC	TT	CC	CT	CT	TT	TT	TT	CT	TT	TT	CC	CC	TT	TT	TT	TT	TT	TT	TT	TT	TT	TT	TT	TT	TT
14087022|F|0-16:T>C-16:T>C	T/C	VU02	25576221	+	NA	NA	NA	NA	NA	NA	NN	CT	NN	TT	TT	TT	TT	CT	CT	CC	TT	CC	CC	TT	CC	TT	CT	TT	TT	TT	TT	TT	TT	TT	TT	TT	NN	TT	CC	CC	TT	CC	CC	TT	TT	TT	CT	TT	CT
14083573|F|0-13:C>G-13:C>G	G/C	VU02	25616901	+	NA	NA	NA	NA	NA	NA	GG	GG	GG	GG	GG	GG	GG	GG	GG	GG	GG	GG	GG	GG	GG	GG	GG	GG	GG	GG	GG	GC	GG	GG	GG	GG	GG	GG	GG	GG	GG	GG	GG	GG	GG	GG	GG	GG	GG
25364107|F|0-26:C>G-26:C>G	G/C	VU02	25642486	+	NA	NA	NA	NA	NA	NA	GG	GG	GG	GG	GG	CC	GG	GG	GG	GG	GG	GG	GG	GG	GG	GG	GG	GG	GG	GG	CC	GC	CC	GC	GG	GG	GG	GG	GG	GC	GG	GG	GG	CC	CC	GG	GG	CC	GG
14075149|F|0-65:G>T-65:G>T	G/T	VU02	25655758	+	NA	NA	NA	NA	NA	NA	GG	GG	GG	GG	GG	GG	GG	GG	GG	GG	GG	GG	GG	GG	GG	GG	GG	GG	GG	GG	GG	GT	GG	GG	GG	GG	GG	GG	GG	GG	GG	GG	GG	GG	GG	GG	GG	GG	GG
14075825|F|0-20:G>T-20:G>T	G/T	VU02	25661692	+	NA	NA	NA	NA	NA	NA	GG	GG	GG	GG	GG	GG	GG	GG	GG	GG	GG	GG	GG	GG	GG	GG	GG	GG	GG	GG	GG	GT	GG	GG	TT	GG	GG	GG	GG	GG	TT	GG	GG	GG	GG	GG	GG	GG	GG
14086432|F|0-44:G>A-44:G>A	A/G	VU02	25662917	+	NA	NA	NA	NA	NA	NA	NN	AA	NN	AA	NN	GG	AA	AA	AA	AA	NN	AA	AA	AA	AA	AA	AA	AA	AA	AA	NN	AA	NN	AA	AA	AA	NN	AA	AA	AA	AA	AA	AA	NN	NN	AA	AA	NN	AA
42774881|F|0-14:C>T-14:C>T	T/C	VU02	25662917	+	NA	NA	NA	NA	NA	NA	CC	TT	CC	TT	CC	NN	TT	TT	TT	TT	CC	TT	TT	TT	TT	TT	TT	TT	TT	TT	NN	TT	NN	TT	TT	TT	CC	TT	TT	TT	TT	TT	TT	NN	NN	TT	TT	NN	TT
14085262|F|0-39:G>A-39:G>A	G/A	VU02	25662968	+	NA	NA	NA	NA	NA	NA	NN	GG	NN	GG	NN	GG	GG	GG	GG	GG	NN	GG	GG	GG	GG	GG	GG	GG	GG	GG	NN	AA	NN	GG	GG	GG	NN	GG	GG	GG	GG	GG	GG	NN	NN	GG	GG	NN	GG
14085263|F|0-16:C>T-16:C>T	T/C	VU02	25662968	+	NA	NA	NA	NA	NA	NA	CC	TT	CC	TT	CC	TT	TT	TT	TT	TT	CC	TT	TT	TT	TT	TT	TT	TT	TT	TT	NN	NN	NN	TT	TT	TT	CC	TT	TT	TT	TT	TT	TT	NN	NN	TT	TT	NN	TT
14086798|F|0-62:C>T-62:C>T	C/T	VU02	25705758	+	NA	NA	NA	NA	NA	NA	CC	NN	NN	CC	NN	CC	CC	NN	NN	CC	CC	CC	CC	CC	CC	CC	CT	CC	CC	CC	CC	CC	CC	CC	CC	CC	NN	CC	CC	CC	CC	NN	CC	CC	CC	CC	NN	CC	NN
14082712|F|0-48:C>T-48:C>T	C/T	VU02	25780422	+	NA	NA	NA	NA	NA	NA	TT	CC	TT	CC	TT	NN	CC	CC	CC	CC	CC	CC	CC	CC	CT	CC	CC	CC	CC	TT	CC	CC	CC	CC	CT	CC	TT	CC	CC	CC	TT	CC	CC	CC	CC	TT	CC	CC	CC
25363820|F|0-42:G>A-42:G>A	A/G	VU02	25780422	+	NA	NA	NA	NA	NA	NA	NN	AA	NN	AA	NN	GG	AA	AA	AA	AA	AA	AA	AA	AA	AA	AA	AA	AA	AA	NN	AA	AA	AA	AA	AA	AA	NN	AA	AA	AA	NN	AA	AA	AA	AA	NN	AA	AA	AA
28497851|F|0-55:A>G-55:A>G	G/A	VU02	25785895	+	NA	NA	NA	NA	NA	NA	GG	GG	NN	GG	GG	GG	GG	GG	GG	AA	NN	GG	AA	AA	GG	NN	AA	GG	GG	GG	NN	AA	AA	AG	GG	AA	NN	GG	GG	GG	NN	GG	GG	NN	NN	GG	GG	NN	GG
14075775|F|0-58:G>A-58:G>A	G/A	VU02	25791739	+	NA	NA	NA	NA	NA	NA	GG	GG	AA	GG	GG	GG	GG	GG	GG	GG	GG	GG	GG	GG	GG	GG	GG	GG	GG	GG	GG	GG	GG	GG	GG	GG	AA	GG	GG	GG	AA	GG	GG	GG	GG	GG	GG	GG	GG
35154543|F|0-64:C>T-64:C>T	T/C	VU02	25814672	+	NA	NA	NA	NA	NA	NA	CC	NN	NN	TT	CC	TT	TT	CC	NN	TT	CC	TT	NN	TT	TT	TT	TT	TT	TT	CC	NN	TT	TT	NN	TT	TT	CC	TT	TT	TT	CC	TT	NN	CC	NN	CC	CC	CC	CC
14076677|F|0-6:A>G-6:A>G	G/A	VU02	25817852	+	NA	NA	NA	NA	NA	NA	GG	GG	GG	GG	GG	GG	GG	GG	GG	GG	AA	GG	GG	GG	GG	GG	GG	GG	GG	GG	AA	GG	GG	GG	GG	GG	GG	GG	GG	GG	GG	GG	GG	AA	AA	NN	GG	AA	GG
25365952|F|0-25:T>G-25:T>G	G/T	VU02	25817852	+	NA	NA	NA	NA	NA	NA	GG	GG	GG	GG	GG	GG	GG	GG	GG	GG	NN	GG	GG	GG	GG	GG	GT	GG	GG	GG	NN	GG	GG	GG	GG	GG	GG	GG	GG	GG	GG	GG	GG	NN	NN	NN	GG	NN	GG
42215351|F|0-14:T>C-14:T>C	T/C	VU02	25817918	+	NA	NA	NA	NA	NA	NA	TT	TT	TT	TT	TT	TT	TT	TT	TT	TT	TT	TT	TT	TT	TT	TT	TT	TT	TT	TT	TT	TT	TT	TT	TT	TT	CT	TT	TT	TT	TT	TT	TT	TT	TT	TT	TT	TT	TT
14077349|F|0-34:A>G-34:A>G	A/G	VU02	25827077	+	NA	NA	NA	NA	NA	NA	AA	AA	AA	GG	AA	AA	GG	AA	AA	AA	AA	GG	AA	AA	GG	AA	AA	AA	AA	AA	AA	AG	AA	AA	AA	AA	AA	AA	GG	GG	AA	GG	GG	AA	AA	AA	AA	AA	AA
14077349|F|0-58:T>G-58:T>G	G	VU02	25827077	+	NA	NA	NA	NA	NA	NA	GG	GG	GG	NN	GG	GG	NN	GG	GG	GG	GG	NN	GG	GG	NN	GG	GG	GG	GG	GG	GG	GG	GG	GG	GG	GG	GG	GG	NN	NN	GG	NN	NN	GG	GG	GG	GG	GG	GG
100009560|F|0-45:C>T-45:C>T	C/T	VU02	25833077	+	NA	NA	NA	NA	NA	NA	CC	CC	CC	TT	CC	CC	TT	CC	CC	CC	CC	CC	CC	CC	CC	CC	CC	CC	CC	NN	CC	CC	CC	CC	CC	NN	NN	CC	CC	CC	NN	CC	NN	NN	CC	NN	CC	CC	CC
14078149|F|0-39:A>G-39:A>G	A/G	VU02	25840080	+	NA	NA	NA	NA	NA	NA	AA	AA	GG	AA	AA	GG	AA	AA	AA	AA	AA	AA	AA	AA	AA	AA	AA	AA	AA	AA	AA	AA	AA	AA	AA	AA	GG	AA	AA	AA	GG	AA	AA	AA	AA	NN	AA	AA	AA
14074207|F|0-56:C>T-56:C>T	C/T	VU02	25869174	+	NA	NA	NA	NA	NA	NA	CC	CC	CC	CC	CC	TT	CC	CC	CC	CC	CC	CC	CC	CC	CC	CC	CC	CC	CC	CC	CC	CC	CC	CC	CC	CC	CC	CC	CC	CC	CC	CC	CC	CC	CC	CC	CC	CC	CC
14077569|F|0-20:G>A-20:G>A	A/G	VU02	25873516	+	NA	NA	NA	NA	NA	NA	GG	AA	AA	AA	GG	AA	AA	AA	AA	AA	AA	AA	AA	AA	AA	AA	AA	AA	AA	AA	AA	AA	AA	AA	AA	AA	AA	AA	AA	AA	AA	AA	AA	AA	AA	AA	AA	AA	GG
14081818|F|0-62:G>A-62:G>A	A/G	VU02	25873578	+	NA	NA	NA	NA	NA	NA	NN	AA	AA	AA	NN	AA	AA	AA	AA	AA	NN	AA	AA	AA	AA	AA	AA	AA	AA	AA	NN	AA	AA	AA	AA	AA	AA	AA	AA	AA	AA	AA	AA	NN	NN	AA	AA	NN	NN
35152888|F|0-13:G>C-13:G>C	C/G	VU02	25873578	+	NA	NA	NA	NA	NA	NA	NN	CC	CC	CC	NN	CC	CC	CC	CC	CC	GG	CC	CC	CC	CC	CC	CC	CC	CC	CC	GG	CC	CC	CC	CC	CC	CC	CC	CC	CC	CC	CC	CC	GG	GG	CC	CC	GG	NN
14087180|F|0-38:T>G-38:T>G	G/T	VU02	25909282	+	NA	NA	NA	NA	NA	NA	TT	GG	TT	TT	TT	TT	TT	GG	GG	GG	TT	GG	GG	GG	TT	GG	GG	GG	GG	TT	TT	GG	GG	GG	GG	GG	TT	GG	GG	GG	TT	GG	TT	TT	TT	TT	GG	TT	TT
14078805|F|0-7:T>A-7:T>A	A/T	VU02	25942901	+	NA	NA	NA	NA	NA	NA	AA	AA	AA	AA	AA	AA	AA	AA	AA	AA	AA	AA	AA	AA	AA	AA	AT	TT	AA	AA	TT	AA	TT	TT	TT	TT	AA	AA	AA	AA	AA	AA	AA	TT	TT	AA	AA	TT	AA
14085216|F|0-17:G>A-17:G>A	G/A	VU02	25954477	+	NA	NA	NA	NA	NA	NA	GG	GG	GG	GG	GG	GG	GG	GG	GG	AA	AA	AA	AA	AA	AA	GG	AG	GG	AA	GG	GG	AA	GG	GG	GG	GG	GG	AA	AA	AA	GG	AA	AA	GG	GG	GG	GG	GG	GG
14081932|F|0-24:T>C-24:T>C	T/C	VU02	25955839	+	NA	NA	NA	NA	NA	NA	TT	TT	TT	TT	TT	TT	TT	TT	TT	TT	TT	TT	TT	TT	TT	TT	TT	TT	TT	TT	CC	TT	TT	TT	TT	TT	TT	TT	TT	TT	TT	TT	TT	TT	CC	TT	TT	CC	TT
14076302|F|0-34:T>A-34:T>A	A/T	VU02	25955905	+	NA	NA	NA	NA	NA	NA	AA	AA	AA	AA	AA	AA	AA	NN	AA	AA	AA	AA	AA	AA	AA	AA	AA	AA	AA	AA	TT	AA	AA	AA	AA	AA	AA	AA	AA	AA	AA	AA	AA	AA	TT	AA	AA	TT	AA
14081620|F|0-61:T>C-61:T>C	T/C	VU02	26006494	+	NA	NA	NA	NA	NA	NA	CC	TT	CC	TT	CC	TT	TT	TT	TT	TT	TT	TT	TT	TT	TT	TT	TT	TT	TT	TT	TT	TT	TT	CT	TT	TT	CT	TT	TT	TT	CC	TT	TT	TT	TT	TT	TT	TT	CC
14076679|F|0-68:T>C-68:T>C	C/T	VU02	26007150	+	NA	NA	NA	NA	NA	NA	CC	CC	CC	CC	CC	CC	CC	CC	CC	CC	CC	CC	CC	CC	CC	CC	CC	CC	CC	CC	TT	CC	CC	CC	CC	CC	CC	CC	CC	CC	CC	CC	CC	NN	TT	CC	CC	TT	CC
14074227|F|0-49:G>T-49:G>T	G/T	VU02	26010857	+	NA	NA	NA	NA	NA	NA	TT	NN	TT	GG	TT	GG	GG	GG	GG	GG	GG	GG	GG	GG	GG	NN	GG	GG	GG	GG	GG	GG	GG	TT	GG	GG	TT	GG	NN	GG	TT	GG	NN	GG	GG	GG	GG	GG	TT
14085638|F|0-12:T>A-12:T>A	A/T	VU02	26013601	+	NA	NA	NA	NA	NA	NA	NN	AA	NN	AA	NN	AA	AA	AA	AA	AA	AA	AA	AA	AA	AA	NN	AA	AA	AA	AA	TT	AA	AA	AA	AA	AA	NN	AA	AA	AA	NN	AA	AA	AA	TT	AA	AA	TT	NN
14085639|F|0-10:G>A-10:G>A	A/G	VU02	26013601	+	NA	NA	NA	NA	NA	NA	GG	AA	GG	AA	GG	AA	AA	AA	AA	AA	AA	AA	AA	AA	AA	NN	AA	AA	AA	AA	NN	AA	AA	AG	AA	AA	GG	AA	AA	AA	GG	AA	AA	AA	NN	AA	AA	NN	GG
14082752|F|0-49:G>A-49:G>A	G/A	VU02	26021173	+	NA	NA	NA	NA	NA	NA	AA	GG	AA	GG	AA	GG	GG	GG	GG	GG	GG	GG	GG	GG	GG	GG	AG	GG	GG	AG	NN	GG	GG	AG	GG	GG	AA	GG	GG	GG	AA	GG	GG	GG	AA	GG	GG	NN	AA
14081887|F|0-15:G>A-15:G>A	A/G	VU02	26021938	+	NA	NA	NA	NA	NA	NA	NN	GG	NN	AA	NN	GG	AA	AA	AA	AA	AA	AA	AA	AA	AA	AA	AG	GG	AA	GG	NN	AA	GG	GG	GG	GG	NN	AA	AA	AA	NN	AA	AA	GG	NN	GG	AA	NN	NN
14080382|F|0-12:A>G-12:A>G	G/A	VU02	26043834	+	NA	NA	NA	NA	NA	NA	AA	AA	AA	GG	AA	GG	GG	GG	AG	GG	GG	GG	GG	GG	GG	AA	AG	GG	GG	AA	AA	GG	GG	AG	GG	GG	AA	GG	GG	GG	AA	GG	GG	GG	AA	AG	GG	AA	AA
35153084|F|0-10:G>C-10:G>C	C/G	VU02	26043892	+	NA	NA	NA	NA	NA	NA	CC	CC	CC	CC	CC	GG	CC	GG	CC	CC	CC	CC	GG	CC	CC	CC	GC	GG	NN	NN	CC	GG	GG	GG	GG	CC	CC	CC	CC	CC	CC	CC	NN	GG	CC	NN	GG	CC	CC
25365795|F|0-38:G>C-38:G>C	G/C	VU02	26051189	+	NA	NA	NA	NA	NA	NA	NN	NN	NN	GG	NN	GG	GG	GG	NN	GG	GG	GG	GG	GG	GG	GG	GG	GG	GG	NN	CC	GG	GG	GG	GG	GG	NN	GG	GG	GG	GG	GG	GG	GG	CC	GG	GG	CC	NN
25365795|F|0-6:A>T-6:A>T	A/T	VU02	26051189	+	NA	NA	NA	NA	NA	NA	TT	TT	TT	AA	TT	AA	AA	AA	TT	AA	AA	AA	AA	AA	AA	AA	AA	AA	AA	TT	NN	AA	AA	AT	AA	AA	TT	AA	AA	AA	TT	AA	AA	AA	NN	AA	AA	NN	TT
14077276|F|0-27:T>A-27:T>A	T/A	VU02	26108306	+	NA	NA	NA	NA	NA	NA	TT	TT	TT	TT	TT	TT	TT	TT	TT	TT	TT	TT	TT	TT	TT	TT	TT	TT	TT	TT	AA	TT	TT	TT	TT	TT	TT	TT	TT	TT	TT	TT	TT	TT	TT	NN	TT	AA	TT
25363223|F|0-16:C>A-16:C>A	C	VU02	26165630	+	NA	NA	NA	NA	NA	NA	CC	CC	CC	CC	CC	CC	CC	CC	CC	CC	CC	CC	CC	CC	CC	CC	CC	CC	CC	CC	CC	CC	CC	CC	CC	CC	CC	CC	CC	CC	CC	CC	CC	CC	CC	CC	CC	CC	CC
25362786|F|0-47:C>T-47:C>T	C	VU02	26186316	+	NA	NA	NA	NA	NA	NA	CC	CC	CC	CC	CC	CC	CC	CC	CC	CC	CC	CC	CC	CC	CC	CC	CC	CC	CC	CC	CC	CC	CC	CC	CC	CC	CC	CC	CC	CC	CC	CC	CC	CC	CC	CC	CC	CC	CC
35152674|F|0-33:T>A-33:T>A	A/T	VU02	26194135	+	NA	NA	NA	NA	NA	NA	AA	AA	AA	AA	AA	AA	AA	AA	AA	AA	TT	NN	TT	TT	TT	AA	AA	AA	NN	AA	AA	TT	AA	AA	AA	NN	AA	NN	NN	NN	AA	TT	NN	AA	AA	AA	AA	AA	AA
14079525|F|0-7:A>G-7:A>G	A	VU02	26212367	+	NA	NA	NA	NA	NA	NA	AA	AA	AA	AA	AA	AA	AA	AA	AA	AA	AA	AA	AA	AA	AA	AA	AA	AA	AA	AA	NN	AA	AA	AA	AA	AA	AA	AA	AA	AA	AA	AA	AA	AA	AA	AA	AA	AA	AA
14073883|F|0-51:C>T-51:C>T	C/T	VU02	26247196	+	NA	NA	NA	NA	NA	NA	CC	CC	CC	CC	CC	CC	CC	CC	CC	CC	CC	CC	CC	CC	CC	CC	CC	CC	CC	CC	CC	CC	CC	CC	CC	CC	CC	CC	CC	CC	CC	CC	CC	CC	TT	CC	CC	CC	CC
25358327|F|0-30:A>T-30:A>T	A/T	VU02	26247262	+	NA	NA	NA	NA	NA	NA	AA	AA	AA	AA	AA	AA	AA	AA	AA	AA	AA	AA	TT	AA	AA	AA	AA	AA	AA	AA	AA	AT	AA	AA	AA	AA	AA	AA	AA	AA	AA	AA	AA	AA	AA	AA	AA	AA	AA
14061208|F|0-41:A>G-41:A>G	A/G	VU02	26252993	+	NA	NA	NA	NA	NA	NA	AA	AA	AA	AA	AA	AA	AA	AA	AA	AA	AA	AA	AA	AA	AA	AA	AA	AA	AA	AA	AA	AA	AA	AA	AA	AA	AA	AA	AA	AA	AA	AA	AA	AA	AA	AG	AA	AA	AA
25365782|F|0-54:A>G-54:A>G	G/A	VU02	26351677	+	NA	NA	NA	NA	NA	NA	GG	GG	GG	AA	GG	GG	AA	GG	GG	GG	AA	GG	GG	GG	AA	GG	GG	GG	AA	GG	GG	GG	GG	GG	GG	GG	GG	AA	AA	GG	GG	AA	GG	GG	GG	GG	GG	GG	GG
14074233|F|0-39:T>G-39:T>G	T/G	VU02	26402103	+	NA	NA	NA	NA	NA	NA	TT	TT	TT	TT	TT	TT	TT	TT	TT	TT	NN	TT	TT	TT	NN	TT	GT	TT	TT	TT	TT	TT	TT	TT	TT	GG	TT	TT	NN	TT	TT	TT	TT	TT	TT	TT	TT	TT	TT
14077119|F|0-12:A>T-12:A>T	T/A	VU02	26410415	+	NA	NA	NA	NA	NA	NA	TT	TT	TT	TT	TT	TT	TT	TT	AT	TT	AA	TT	TT	AA	AA	TT	AT	TT	TT	TT	TT	TT	TT	TT	TT	AA	TT	TT	AA	AT	TT	TT	TT	TT	TT	TT	TT	TT	TT
25365669|F|0-12:C>T-12:C>T	C/T	VU02	26430685	+	NA	NA	NA	NA	NA	NA	CC	CC	CC	CC	CC	CC	CC	CC	CC	CC	CC	CC	CC	CC	CC	CC	CT	CC	CT	CC	CC	CC	CC	CC	CC	TT	CC	CC	CC	CC	CC	CC	CC	CC	CC	CC	CC	CC	CC
14073688|F|0-31:A>G-31:A>G	A/G	VU02	26520130	+	NA	NA	NA	NA	NA	NA	AA	AA	AA	AA	AA	AA	AA	AA	AA	AA	AA	AA	AA	AA	AA	AA	AA	AA	AG	AA	AA	AA	AA	AA	AA	AA	AA	AA	AA	AA	AA	AA	AA	AA	GG	AA	AA	AA	GG
25364634|F|0-7:A>C-7:A>C	A/C	VU02	26577079	+	NA	NA	NA	NA	NA	NA	AA	AA	AA	AA	AA	AA	AA	AA	AA	AA	AA	AA	AA	AA	AA	AA	AA	AA	AA	AA	AA	AA	AA	AA	AA	AA	AA	AA	AA	AA	AA	AA	AA	AA	AA	AA	AA	AA	AA
35154749|F|0-36:T>C-36:T>C	C/T	VU02	26607723	+	NA	NA	NA	NA	NA	NA	TT	TT	TT	CC	TT	TT	CC	TT	TT	CC	CC	CC	CC	CC	TT	CC	CT	TT	CC	NN	TT	CC	TT	TT	TT	CC	TT	CC	CC	CC	TT	NN	CC	NN	TT	TT	TT	NN	TT
14056465|F|0-20:A>G-20:A>G	A/G	VU02	26650959	+	NA	NA	NA	NA	NA	NA	AA	AA	AA	AA	AA	AA	AA	AA	AA	GG	AA	AA	NN	GG	AA	AA	AA	AA	AA	AA	AA	AA	AA	AA	AA	AA	AA	AA	AA	AA	AA	AA	AA	AA	AA	AA	AA	AA	AA
14056465|F|0-9:G>A-9:G>A	G/A	VU02	26650959	+	NA	NA	NA	NA	NA	NA	GG	GG	GG	GG	GG	GG	GG	GG	GG	NN	GG	GG	AA	GG	GG	GG	GG	GG	GG	GG	GG	GG	GG	GG	GG	GG	GG	GG	GG	GG	GG	GG	GG	GG	GG	GG	GG	GG	GG
25353754|F|0-12:C>T-12:C>T	C/T	VU02	26658708	+	NA	NA	NA	NA	NA	NA	CC	CC	CC	CC	CC	CC	CC	CC	CC	CC	CC	CC	CC	CC	CC	CC	CC	CC	CC	CC	CC	CC	CC	CC	CT	CC	CC	CC	CC	CC	CC	CC	CC	CC	CC	CC	CC	CC	CC
14056540|F|0-41:T>C-41:T>C	T/C	VU02	26700959	+	NA	NA	NA	NA	NA	NA	TT	TT	TT	TT	TT	TT	TT	TT	TT	TT	TT	TT	TT	TT	TT	TT	TT	TT	CT	TT	TT	TT	TT	TT	TT	TT	TT	TT	TT	TT	TT	TT	TT	TT	TT	NN	TT	TT	TT
35151295|F|0-65:G>T-65:G>T	G/T	VU02	26707848	+	NA	NA	NA	NA	NA	NA	GG	GG	GG	GG	GG	GG	GG	GG	GG	GG	GG	GG	GG	GG	GG	GG	GG	GG	GG	GG	GG	GG	GG	GG	GG	GG	GG	GG	GG	GG	GG	GG	GG	GG	GG	NN	GG	GG	GG
25363992|F|0-63:G>A-63:G>A	G/A	VU02	26714183	+	NA	NA	NA	NA	NA	NA	GG	GG	GG	GG	GG	GG	GG	GG	GG	GG	GG	GG	GG	GG	GG	GG	GG	GG	GG	GG	GG	GG	GG	GG	GG	GG	GG	GG	GG	GG	GG	GG	GG	GG	GG	GG	GG	GG	GG
35153889|F|0-58:G>A-58:G>A	G/A	VU02	26738785	+	NA	NA	NA	NA	NA	NA	GG	GG	GG	AA	GG	AA	AA	GG	GG	AA	AA	AA	GG	AA	AA	AA	GG	GG	NN	GG	GG	AG	GG	GG	GG	AA	GG	AA	NN	NN	GG	AA	AA	NN	GG	GG	GG	NN	GG
100011051|F|0-64:G>A-64:G>A	G/A	VU02	26744981	+	NA	NA	NA	NA	NA	NA	GG	GG	GG	GG	GG	GG	GG	GG	GG	GG	GG	GG	GG	GG	GG	GG	GG	GG	GG	GG	GG	GG	GG	GG	NN	GG	GG	GG	GG	GG	GG	GG	GG	GG	GG	GG	GG	GG	GG
14059838|F|0-34:A>G-34:A>G	A/G	VU02	26751583	+	NA	NA	NA	NA	NA	NA	AA	AA	AA	GG	AA	GG	GG	AA	AA	GG	GG	AG	AA	GG	GG	GG	AA	AA	GG	AA	AA	AG	AA	AA	AA	GG	AA	GG	GG	GG	AA	GG	GG	AA	AA	AA	AG	AA	AA
14055173|F|0-66:C>G-66:C>G	C/G	VU02	26753507	+	NA	NA	NA	NA	NA	NA	CC	CC	CC	CC	CC	CC	CC	CC	CC	CC	CC	CC	CC	CC	CC	CC	CC	CC	CC	CC	CC	CC	CC	CC	CC	CC	CC	CC	CC	CC	CC	CC	CC	CC	CC	CC	CC	CC	CC
14084665|F|0-50:C>T-50:C>T	C/T	VU02	26796426	+	NA	NA	NA	NA	NA	NA	CC	CC	CC	CC	CC	CC	CC	CC	CC	CC	CC	CC	CC	CC	CC	CC	CC	CC	CC	CC	CC	CC	CC	CC	CC	CC	CC	CC	CC	CC	CC	CC	CC	CC	CC	TT	CC	CC	CC
25353375|F|0-60:C>T-60:C>T	T/C	VU02	26902608	+	NA	NA	NA	NA	NA	NA	CC	CC	CC	TT	CC	CC	TT	CC	CC	TT	TT	TT	TT	TT	CC	TT	CC	CC	TT	CC	CC	TT	CC	CT	CC	TT	CC	TT	TT	TT	CC	TT	TT	CC	CC	TT	CC	CC	CC
42215415|F|0-25:A>G-25:A>G	G	VU02	26949511	+	NA	NA	NA	NA	NA	NA	GG	GG	GG	GG	GG	GG	GG	GG	GG	GG	GG	GG	GG	GG	GG	GG	GG	GG	NN	GG	GG	GG	NN	GG	GG	GG	GG	GG	GG	NN	GG	GG	GG	GG	GG	GG	GG	NN	GG
14074385|F|0-14:G>T-14:G>T	G/T	VU02	26978326	+	NA	NA	NA	NA	NA	NA	GG	GG	GG	TT	GG	TT	TT	GG	GG	GG	GG	TT	GG	GG	GG	GG	GG	GG	GG	GG	GG	GT	GG	GG	GG	TT	GG	GG	GG	TT	GG	TT	TT	GG	GG	GG	GG	GG	GG
14073948|F|0-41:G>T-41:G>T	T/G	VU02	27005280	+	NA	NA	NA	NA	NA	NA	GG	GG	GG	TT	GG	TT	TT	TT	GG	TT	GG	TT	TT	TT	TT	TT	GG	GG	TT	GG	GG	TT	TT	GT	TT	TT	GG	TT	TT	TT	GG	TT	TT	GG	GG	GG	GG	GG	GG
14087736|F|0-31:C>G-31:C>G	G/C	VU02	27161687	+	NA	NA	NA	NA	NA	NA	CC	CC	CC	GG	CC	GG	GG	GG	CC	GG	CC	GG	CC	CC	GG	GG	GC	CC	GG	CC	CC	CC	GG	GG	GG	GG	CC	GG	GG	GG	CC	CC	GG	CC	CC	CC	CC	CC	CC
14057018|F|0-9:C>A-9:C>A	C/A	VU02	27210238	+	NA	NA	NA	NA	NA	NA	CC	CC	CC	CC	CC	CC	CC	CC	CC	CC	CC	CC	CC	CC	CC	CC	CC	CC	CC	CC	CC	CC	CC	CC	CC	CC	CC	CC	CC	CC	CC	CC	CC	CC	CC	NN	CC	CC	CC
42215628|F|0-19:C>T-19:C>T	C/T	VU02	27256144	+	NA	NA	NA	NA	NA	NA	CC	CC	CC	CC	CC	CC	CC	CC	CC	CC	CC	CC	CC	CC	CC	CC	CC	CC	CC	CC	CC	CC	CC	CC	CC	CC	NN	CC	CC	CC	CC	CC	CC	CC	CC	CC	CC	NN	CC
14084268|F|0-9:A>C-9:A>C	C/A	VU02	27306314	+	NA	NA	NA	NA	NA	NA	AA	AA	AA	CC	AA	AA	CC	AA	AA	CC	CC	CC	CC	CC	CC	CC	AC	AA	CC	AA	AA	CC	AA	AA	AA	CC	NN	CC	CC	CC	AA	CC	CC	AA	AA	AA	AA	AA	AA
25355220|F|0-52:C>A-52:C>A	C/A	VU02	27308257	+	NA	NA	NA	NA	NA	NA	CC	CC	CC	CC	CC	CC	CC	CC	CC	CC	CC	CC	CC	CC	CC	CC	CC	CC	CC	CC	CC	AC	CC	CC	CC	CC	CC	CC	CC	CC	CC	CC	CC	CC	CC	CC	CC	CC	CC
42215646|F|0-60:A>G-60:A>G	G/A	VU02	27338261	+	NA	NA	NA	NA	NA	NA	GG	GG	GG	GG	GG	GG	GG	GG	GG	GG	GG	GG	GG	GG	GG	GG	GG	GG	GG	GG	GG	GG	GG	NN	GG	GG	GG	GG	GG	GG	GG	GG	GG	GG	GG	NN	GG	GG	GG
14073936|F|0-35:C>G-35:C>G	C/G	VU02	27345379	+	NA	NA	NA	NA	NA	NA	CC	CC	CC	CC	CC	CC	CC	CC	CC	CC	CC	CC	CC	CC	CC	CC	CC	CC	CC	CC	CC	CC	CC	CC	CC	CC	CC	CC	CC	CC	CC	CC	CC	CC	CC	CC	CC	CC	CC
25355643|F|0-34:A>G-34:A>G	A/G	VU02	27376892	+	NA	NA	NA	NA	NA	NA	GG	AA	GG	AA	AA	AA	AA	AA	AA	AA	AA	AA	AA	AA	AA	AA	AA	GG	AA	AG	GG	AA	AA	AA	AA	AA	GG	AA	AA	AA	AG	AA	AA	AA	AA	NN	GG	GG	AA
14081628|F|0-12:A>G-12:A>G	A/G	VU02	27377349	+	NA	NA	NA	NA	NA	NA	GG	AA	GG	AA	AA	AA	AA	AA	AA	AA	AA	AA	AA	AA	AA	AA	AA	GG	NN	GG	GG	AA	AA	AA	AA	AA	GG	AA	AA	AA	GG	AA	AA	AA	AA	AA	GG	GG	AA
14085687|F|0-32:T>C-32:T>C	C/T	VU02	27378845	+	NA	NA	NA	NA	NA	NA	TT	CC	TT	CC	CC	CC	CC	CC	CC	CC	CC	CC	CC	CC	CC	CC	CC	TT	CC	TT	TT	CC	CC	CC	CC	CC	TT	CC	CC	CC	TT	CC	CC	CC	CC	CC	TT	TT	CC
14085081|F|0-36:G>A-36:G>A	G/A	VU02	27506228	+	NA	NA	NA	NA	NA	NA	GG	GG	AA	GG	GG	GG	GG	GG	GG	GG	GG	GG	GG	GG	GG	GG	GG	AA	GG	AA	AA	GG	GG	GG	GG	GG	GG	GG	GG	GG	GG	GG	GG	AA	GG	GG	AA	AA	GG
14073377|F|0-9:T>C-9:T>C	C/T	VU02	27510946	+	NA	NA	NA	NA	NA	NA	TT	CC	TT	CC	TT	TT	CC	CT	CC	CC	CC	CC	CC	CC	CC	CC	CT	TT	CT	NN	TT	CC	CC	CC	TT	CC	TT	CC	CC	CC	TT	CC	CC	TT	TT	TT	TT	TT	TT
35154343|F|0-29:G>C-29:G>C	C/G	VU02	27513066	+	NA	NA	NA	NA	NA	NA	CC	CC	CC	CC	CC	GG	CC	CC	CC	CC	CC	CC	CC	CC	CC	CC	CC	CC	CC	CC	CC	CC	CC	CC	CC	CC	CC	CC	CC	CC	CC	CC	CC	CC	CC	CC	CC	CC	CC
14083520|F|0-48:C>T-48:C>T	T/C	VU02	27523912	+	NA	NA	NA	NA	NA	NA	CC	TT	CC	TT	CC	NN	TT	TT	TT	TT	TT	TT	TT	TT	TT	TT	CC	CT	TT	CC	CC	TT	TT	TT	CC	TT	CC	TT	TT	TT	CC	TT	TT	CC	CC	CC	CC	CC	CC
14073459|F|0-62:T>C-62:T>C	T/C	VU02	27537236	+	NA	NA	NA	NA	NA	NA	TT	TT	CC	TT	TT	CC	TT	TT	TT	TT	TT	TT	TT	TT	TT	TT	TT	CC	TT	CC	CC	TT	TT	TT	TT	TT	TT	TT	TT	TT	TT	TT	TT	CC	TT	TT	CT	CC	TT
14074752|F|0-11:T>G-11:T>G	G/T	VU02	27551206	+	NA	NA	NA	NA	NA	NA	TT	GG	TT	GG	TT	TT	GG	GG	GG	GG	GG	GG	GG	GG	GG	GG	TT	TT	GG	TT	TT	NN	GG	GG	TT	GG	TT	GG	GG	GG	TT	NN	GG	NN	TT	NN	TT	TT	TT
14075722|F|0-49:C>T-49:C>T	C/T	VU02	27590849	+	NA	NA	NA	NA	NA	NA	CC	CC	TT	CC	CC	TT	CC	CC	CC	TT	CC	TT	TT	TT	CC	TT	CT	CC	CT	TT	TT	CC	CC	CC	CC	TT	CC	CC	TT	TT	CC	TT	CC	CC	CC	CC	TT	TT	CC
25353781|F|0-33:G>A-33:G>A	G/A	VU02	27623293	+	NA	NA	NA	NA	NA	NA	GG	GG	GG	AA	GG	GG	AA	GG	GG	GG	GG	GG	GG	GG	AA	GG	GG	GG	GG	GG	GG	GG	GG	GG	GG	GG	GG	GG	GG	GG	GG	GG	AA	GG	GG	GG	GG	GG	GG
28497849|F|0-16:A>T-16:A>T	A/T	VU02	27649981	+	NA	NA	NA	NA	NA	NA	AA	AA	AA	AA	AA	AA	AA	AA	AA	AA	AA	TT	AA	AA	AA	TT	AT	AA	AT	AA	AA	AT	AA	AA	AA	TT	AA	TT	AA	TT	AA	TT	AA	AA	AA	AA	AA	TT	AA
14085184|F|0-50:C>T-50:C>T	C/T	VU02	27655138	+	NA	NA	NA	NA	NA	NA	CC	CC	CC	CC	CC	NN	CC	CC	CC	CC	CC	TT	CC	CC	CC	TT	CT	CC	TT	CC	CC	CC	CC	CC	CC	TT	CC	TT	CC	TT	CC	TT	CC	CC	CC	CC	CC	TT	CC
25363397|F|0-47:T>G-47:T>G	T/G	VU02	27699872	+	NA	NA	NA	NA	NA	NA	TT	TT	TT	TT	TT	GG	TT	TT	TT	TT	TT	TT	TT	TT	TT	TT	TT	TT	TT	TT	TT	TT	TT	TT	TT	TT	TT	TT	TT	TT	TT	TT	TT	TT	TT	TT	GT	TT	TT
25364345|F|0-22:G>A-22:G>A	G/A	VU02	27725554	+	NA	NA	NA	NA	NA	NA	GG	GG	GG	AA	GG	AA	AA	GG	GG	GG	GG	GG	GG	AA	AA	GG	GG	GG	AA	GG	GG	NN	GG	GG	GG	GG	GG	NN	AA	GG	GG	GG	NN	GG	GG	GG	GG	GG	GG
25365071|F|0-49:A>T-49:A>T	A/T	VU02	27726069	+	NA	NA	NA	NA	NA	NA	AA	AA	AA	TT	AA	TT	TT	AA	AA	AA	AA	AA	AA	TT	TT	AA	AA	AA	TT	AA	AA	AA	AA	AA	AA	AA	AA	TT	TT	AA	AA	AA	TT	AA	AA	AA	AA	AA	AA
100009525|F|0-16:C>T-16:C>T	C/T	VU02	27863387	+	NA	NA	NA	NA	NA	NA	CC	CC	CC	CC	CC	CC	CC	CC	CC	CC	NN	CC	CC	CC	CC	CC	CC	CC	CC	CC	NN	CC	CC	CC	CC	CC	TT	CC	CC	CC	CC	CC	CC	CC	CC	CC	NN	CC	CC
14074157|F|0-60:C>T-60:C>T	C/T	VU02	27890116	+	NA	NA	NA	NA	NA	NA	CC	CC	CC	CC	CC	CC	CC	CC	CC	CC	CC	CC	CC	CC	CC	CC	CC	CC	CC	CC	CC	CC	CC	CC	CC	CC	NN	CC	CC	CC	CC	CC	CC	CC	CC	CC	CC	CC	CC
14074157|F|0-64:A>G-64:A>G	A/G	VU02	27890116	+	NA	NA	NA	NA	NA	NA	AA	AA	AA	AA	AA	AA	AA	AA	AA	AA	AA	AA	AA	AA	AA	AA	AA	AA	AA	AA	AA	AA	AA	AA	AA	AA	GG	AA	AA	AA	AA	AA	AA	AA	AA	AA	AA	AA	AA
14075052|F|0-29:G>A-29:G>A	G/A	VU02	27921735	+	NA	NA	NA	NA	NA	NA	GG	GG	GG	GG	GG	GG	GG	GG	GG	GG	GG	GG	GG	GG	GG	GG	GG	GG	GG	GG	GG	GG	GG	GG	GG	GG	GG	GG	GG	GG	GG	GG	GG	GG	GG	GG	GG	GG	GG
42215538|F|0-30:T>C-30:T>C	T	VU02	27959973	+	NA	NA	NA	NA	NA	NA	TT	TT	TT	TT	NN	TT	TT	TT	TT	TT	NN	TT	NN	TT	TT	NN	TT	TT	TT	TT	TT	TT	TT	TT	TT	TT	NN	TT	TT	TT	TT	TT	TT	TT	TT	NN	TT	TT	NN
14078067|F|0-24:T>C-24:T>C	C/T	VU02	27960039	+	NA	NA	NA	NA	NA	NA	TT	CC	CC	CC	TT	TT	CC	CC	TT	CC	CC	CC	CC	CC	CC	CC	CC	CC	CC	CC	CC	CC	CC	CC	CC	NN	CC	CC	CC	CC	CC	CC	CC	CC	TT	TT	CC	CC	NN
14077908|F|0-39:C>G-39:C>G	G/C	VU02	27987174	+	NA	NA	NA	NA	NA	NA	NN	GG	GG	GG	NN	GG	GG	GG	NN	GG	GG	GG	GG	GG	GG	GG	GG	GG	GG	NN	GG	GG	GG	GG	GG	GG	GG	GG	GG	GG	GG	GG	GG	GG	NN	NN	GG	GG	NN
14086515|F|0-23:C>A-23:C>A	C/A	VU02	27997352	+	NA	NA	NA	NA	NA	NA	AA	CC	CC	CC	AA	CC	CC	CC	AA	CC	CC	CC	CC	CC	CC	CC	CC	CC	CC	AA	CC	CC	CC	CC	CC	CC	CC	CC	CC	CC	CC	CC	CC	CC	CC	AA	CC	CC	CC
14076041|F|0-36:G>A-36:G>A	G/A	VU02	28026854	+	NA	NA	NA	NA	NA	NA	AA	GG	GG	GG	AA	GG	GG	AA	AA	GG	GG	GG	GG	GG	GG	GG	GG	GG	GG	AA	GG	GG	GG	NN	AA	GG	GG	GG	GG	GG	GG	GG	GG	GG	GG	AA	GG	GG	GG
14074701|F|0-44:C>T-44:C>T	C/T	VU02	28035039	+	NA	NA	NA	NA	NA	NA	TT	CC	CC	CC	TT	CC	CC	TT	CT	CC	CC	CC	CC	CC	CC	CC	CC	CC	CC	TT	CC	CC	CC	CC	TT	CC	CC	CC	CC	CC	CC	CC	CC	CC	CC	TT	CC	CC	CC
14074162|F|0-26:G>C-26:G>C	G/C	VU02	28052500	+	NA	NA	NA	NA	NA	NA	GG	GG	GG	GG	GG	GG	GG	GG	GG	GG	GG	GG	GG	GG	GG	GG	GG	GG	GG	GG	GG	GG	GG	GG	GG	GG	GG	GG	GG	GG	GG	GG	GG	GG	GG	GG	GG	GG	GG
14079656|F|0-35:C>A-35:C>A	C/A	VU02	28052566	+	NA	NA	NA	NA	NA	NA	CC	CC	CC	CC	CC	CC	CC	CC	CC	CC	CC	CC	CC	CC	CC	CC	CC	CC	CC	CC	CC	CC	CC	CC	CC	CC	CC	CC	CC	CC	CC	CC	CC	CC	CC	CC	CC	CC	CC
14081952|F|0-45:T>C-45:T>C	T/C	VU02	28072305	+	NA	NA	NA	NA	NA	NA	CC	CC	TT	TT	CC	TT	TT	CC	CC	TT	TT	TT	TT	TT	TT	TT	TT	CC	TT	CC	TT	TT	TT	TT	CC	TT	TT	TT	TT	TT	CC	TT	TT	TT	TT	CC	TT	TT	TT
14081952|F|0-59:G>A-59:G>A	G/A	VU02	28072305	+	NA	NA	NA	NA	NA	NA	NN	NN	GG	GG	NN	GG	GG	NN	NN	GG	GG	GG	GG	GG	GG	GG	GG	NN	GG	NN	GG	GG	GG	GG	NN	GG	GG	GG	GG	GG	NN	GG	GG	GG	GG	NN	GG	GG	GG
14074565|F|0-21:T>C-21:T>C	T/C	VU02	28075048	+	NA	NA	NA	NA	NA	NA	CT	CT	TT	TT	CT	TT	TT	CT	CT	TT	TT	TT	TT	TT	TT	TT	TT	CT	TT	CC	TT	NN	TT	CT	TT	TT	TT	TT	TT	TT	CT	TT	TT	TT	TT	CC	TT	TT	TT
14078955|F|0-6:G>C-6:G>C	G	VU02	28088065	+	NA	NA	NA	NA	NA	NA	GG	GG	GG	GG	GG	GG	GG	GG	GG	GG	GG	GG	GG	GG	GG	GG	GG	GG	GG	GG	GG	GG	GG	GG	GG	GG	GG	GG	GG	GG	GG	GG	GG	GG	GG	GG	GG	GG	GG
14078956|F|0-7:A>C-7:A>C	A	VU02	28088065	+	NA	NA	NA	NA	NA	NA	AA	AA	AA	AA	AA	AA	AA	AA	AA	AA	AA	AA	AA	AA	AA	AA	AA	AA	AA	AA	AA	AA	AA	AA	AA	AA	AA	AA	AA	AA	AA	AA	AA	AA	AA	AA	AA	AA	AA
14086473|F|0-6:A>T-6:A>T	T/A	VU02	28095819	+	NA	NA	NA	NA	NA	NA	AA	AA	TT	TT	AA	TT	TT	AA	AA	TT	TT	TT	TT	TT	TT	TT	TT	AA	TT	AA	TT	TT	TT	AA	AA	TT	TT	TT	TT	TT	AA	TT	TT	TT	TT	AA	TT	TT	TT
14075710|F|0-31:A>G-31:A>G	G/A	VU02	28109828	+	NA	NA	NA	NA	NA	NA	AA	AA	GG	GG	AA	GG	GG	AA	AG	GG	GG	GG	GG	GG	GG	GG	GG	AA	GG	AA	GG	GG	GG	AA	AA	GG	GG	GG	GG	GG	AA	GG	GG	GG	GG	AA	GG	GG	GG
14075081|F|0-6:A>C-6:A>C	C/A	VU02	28113776	+	NA	NA	NA	NA	NA	NA	AA	AA	CC	CC	AA	CC	CC	AA	AA	CC	CC	CC	CC	CC	CC	CC	CC	AA	CC	AA	CC	CC	CC	AA	AA	CC	CC	CC	CC	CC	AA	CC	CC	CC	CC	AA	CC	CC	CC
100032007|F|0-6:A>C-6:A>C	A/C	VU02	28149198	+	NA	NA	NA	NA	NA	NA	AA	AA	AA	AA	AA	AA	AA	CC	AA	AA	AA	AA	AA	AA	AA	AA	AA	AA	AA	AA	AA	AA	AA	AA	AA	AA	AA	AA	AA	AA	AA	AA	AA	AA	AA	AA	AA	AA	AA
14082066|F|0-40:A>G-40:A>G	G/A	VU02	28214098	+	NA	NA	NA	NA	NA	NA	AA	AA	AA	GG	AA	GG	GG	AA	AA	GG	GG	GG	GG	GG	GG	GG	AG	AA	GG	AA	AA	GG	GG	AA	AA	GG	GG	GG	GG	GG	AA	GG	GG	GG	AA	AA	AA	AA	AA
28202985|F|0-54:T>G-54:T>G	T	VU02	28246142	+	NA	NA	NA	NA	NA	NA	TT	TT	TT	TT	TT	TT	TT	TT	TT	TT	TT	TT	TT	TT	TT	TT	TT	TT	TT	TT	TT	NN	TT	TT	TT	TT	NN	NN	TT	TT	TT	TT	TT	TT	TT	TT	TT	TT	TT
14087260|F|0-50:C>A-50:C>A	A/C	VU02	28273975	+	NA	NA	NA	NA	NA	NA	CC	CC	CC	AA	CC	AA	AA	CC	CC	AA	AA	AA	AA	AA	AA	AA	AC	CC	AA	CC	CC	AA	AA	CC	CC	AA	AA	AA	AA	AA	CC	AA	AA	AA	CC	CC	CC	CC	CC
14085114|F|0-65:C>T-65:C>T	C/T	VU02	28307802	+	NA	NA	NA	NA	NA	NA	CC	CC	CC	CC	CC	CC	CC	TT	TT	CC	CC	CC	CC	CC	CC	CC	CC	CC	CC	CC	CC	CC	CC	TT	TT	CC	CC	CC	CC	CC	CC	CC	CC	CC	CC	CC	CC	CC	TT
25363670|F|0-54:G>T-54:G>T	T	VU02	28312336	+	NA	NA	NA	NA	NA	NA	TT	TT	TT	TT	TT	TT	TT	TT	TT	TT	TT	TT	TT	TT	TT	TT	TT	TT	TT	TT	TT	TT	TT	TT	TT	TT	TT	TT	TT	TT	TT	TT	TT	TT	TT	TT	TT	TT	TT
25363680|F|0-9:T>C-9:T>C	C	VU02	28312837	+	NA	NA	NA	NA	NA	NA	CC	CC	CC	CC	CC	CC	CC	CC	CC	CC	CC	CC	CC	CC	CC	CC	CC	CC	CC	CC	CC	CC	CC	CC	CC	CC	CC	CC	CC	CC	CC	CC	CC	CC	CC	CC	CC	CC	CC
14076790|F|0-13:C>A-13:C>A	C/A	VU02	28320391	+	NA	NA	NA	NA	NA	NA	AA	AA	AA	CC	CC	CC	CC	AA	AA	CC	CC	CC	CC	CC	CC	CC	AC	AA	CC	AA	AA	CC	CC	AA	AA	CC	CC	CC	CC	CC	AA	CC	CC	CC	AA	AA	AA	AA	AA
14087023|F|0-18:A>G-18:A>G	G/A	VU02	28320457	+	NA	NA	NA	NA	NA	NA	AA	AA	AA	GG	GG	GG	GG	AA	AG	GG	GG	GG	GG	GG	GG	GG	AG	AA	GG	AA	AA	GG	GG	AA	AA	GG	GG	GG	GG	GG	AG	GG	GG	GG	AA	AA	AA	AA	AA
14075813|F|0-64:T>G-64:T>G	T/G	VU02	28324743	+	NA	NA	NA	NA	NA	NA	GG	GG	GG	TT	TT	TT	TT	GG	GG	TT	TT	TT	TT	TT	TT	TT	GT	GG	TT	GG	GG	TT	TT	GG	GG	TT	TT	TT	TT	TT	GG	TT	NN	TT	GG	GG	GG	NN	GG
14076631|F|0-25:T>C-25:T>C	T/C	VU02	28326005	+	NA	NA	NA	NA	NA	NA	CC	CC	CC	TT	TT	TT	TT	CC	CC	TT	TT	TT	TT	TT	TT	TT	CT	CC	TT	CC	CC	TT	TT	CC	CC	TT	TT	TT	TT	TT	CC	TT	TT	TT	CC	CC	CC	CC	CC
14076662|F|0-29:G>A-29:G>A	A/G	VU02	28340603	+	NA	NA	NA	NA	NA	NA	GG	GG	GG	AA	AA	AA	AA	AG	AG	AA	AA	AA	AA	AA	AA	AA	AG	GG	AA	GG	GG	AA	AA	GG	GG	AA	AA	AA	AA	AA	GG	AA	AA	AA	GG	GG	GG	GG	GG
14073658|F|0-9:G>C-9:G>C	G/C	VU02	28390070	+	NA	NA	NA	NA	NA	NA	CC	CC	GG	GG	GG	GG	GG	CC	GC	GG	GG	GG	GG	GG	GG	GG	GC	CC	GG	CC	GG	GG	GG	CC	CC	GG	GG	GG	GG	GG	CC	GG	GG	GG	CC	NN	GG	CC	CC
35152926|F|0-16:C>A-16:C>A	C/A	VU02	28390592	+	NA	NA	NA	NA	NA	NA	CC	CC	CC	CC	CC	CC	CC	NN	NN	CC	CC	CC	CC	CC	CC	CC	AC	AA	CC	AA	CC	CC	CC	CC	CC	CC	CC	CC	NN	CC	AA	NN	CC	CC	NN	NN	CC	AA	CC
14075926|F|0-21:C>T-21:C>T	C/T	VU02	28398085	+	NA	NA	NA	NA	NA	NA	CC	CC	CC	CC	CC	CC	CC	CC	CC	CC	CC	CC	NN	CC	CC	CC	TT	TT	CC	TT	CC	NN	NN	CC	CC	NN	CC	NN	CC	CC	TT	NN	CC	NN	TT	NN	CC	NN	CC
14086623|F|0-11:T>A-11:T>A	A/T	VU02	28400635	+	NA	NA	NA	NA	NA	NA	NN	AA	AA	AA	AA	AA	AA	NN	TT	AA	AA	AA	AA	AA	AA	AA	AT	TT	AA	AA	AA	AA	AA	NN	NN	AA	AA	AA	AA	AA	TT	AA	AA	AA	TT	TT	AA	AA	NN
14086624|F|0-41:C>T-41:C>T	T/C	VU02	28400635	+	NA	NA	NA	NA	NA	NA	CC	CC	TT	TT	TT	TT	TT	CC	NN	TT	TT	TT	TT	TT	TT	TT	TT	NN	TT	TT	TT	TT	TT	CC	CC	TT	TT	TT	TT	TT	NN	TT	TT	TT	NN	NN	TT	TT	CC
14054842|F|0-31:A>G-31:A>G	A/G	VU02	28406685	+	NA	NA	NA	NA	NA	NA	AA	AA	AA	AA	AA	AA	AA	AA	AA	AA	AA	AA	AA	AA	AA	AA	AA	AA	AA	AA	AA	AA	AA	AA	AA	AA	AA	AA	AA	AA	AA	AA	AA	AA	AA	AA	AA	AA	AA
14084204|F|0-6:G>A-6:G>A	G/A	VU02	28447697	+	NA	NA	NA	NA	NA	NA	GG	GG	AA	GG	GG	GG	GG	AA	GG	GG	GG	GG	GG	GG	GG	GG	GG	GG	GG	GG	AA	GG	GG	AG	GG	GG	GG	GG	GG	GG	GG	GG	GG	GG	GG	GG	AA	GG	AA
14087274|F|0-46:A>G-46:A>G	G/A	VU02	28464768	+	NA	NA	NA	NA	NA	NA	GG	GG	AA	GG	GG	GG	GG	AA	GG	GG	GG	GG	GG	GG	GG	GG	AG	AA	GG	GG	AA	GG	GG	AG	GG	GG	GG	GG	GG	GG	GG	GG	GG	GG	AA	AA	AA	AA	AA
14085189|F|0-51:A>G-51:A>G	A/G	VU02	28465836	+	NA	NA	NA	NA	NA	NA	AA	AA	GG	AA	AA	AA	AA	NN	AA	AA	AA	AA	AA	AA	AA	AA	AG	GG	AA	AA	GG	AA	AA	AA	AA	AA	AA	AA	AA	AA	AA	AA	AA	AA	GG	GG	GG	GG	NN
14084589|F|0-36:C>G-36:C>G	C/G	VU02	28516058	+	NA	NA	NA	NA	NA	NA	GG	CC	CC	CC	CC	CC	CC	GG	CC	CC	CC	CC	CC	CC	CC	CC	CC	CC	CC	CC	CC	CC	CC	GC	CC	CC	GG	CC	CC	CC	CC	CC	CC	CC	CC	CC	CC	CC	GG
42215863|F|0-31:C>A-31:C>A	C/A	VU02	28540654	+	NA	NA	NA	NA	NA	NA	AA	NN	CC	CC	NN	CC	CC	NN	CC	CC	CC	CC	CC	CC	CC	CC	CC	AA	CC	CC	CC	CC	NN	NN	CC	CC	AA	NN	CC	CC	CC	CC	NN	CC	NN	NN	CC	CC	NN
14084606|F|0-8:G>A-8:G>A	G/A	VU02	28563358	+	NA	NA	NA	NA	NA	NA	AA	GG	GG	GG	GG	GG	GG	AA	GG	GG	GG	GG	GG	GG	GG	GG	GG	AA	GG	GG	GG	GG	GG	AG	AA	GG	AA	GG	GG	GG	GG	GG	GG	GG	GG	AA	GG	GG	AA
35152876|F|0-60:A>C-60:A>C	A/C	VU02	28608269	+	NA	NA	NA	NA	NA	NA	CC	CC	AA	AA	AA	AA	AA	NN	AA	AA	AA	AA	AA	AA	AA	AA	AA	CC	AA	AA	NN	NN	NN	AC	NN	AA	CC	NN	AA	AA	NN	AA	AA	AA	NN	NN	AA	AA	NN
14062600|F|0-64:C>T-64:C>T	C/T	VU02	28610870	+	NA	NA	NA	NA	NA	NA	NN	NN	CC	CC	CC	CC	CC	NN	CC	CC	CC	CC	CC	CC	CC	CC	CC	NN	CC	CC	CC	CC	CC	CC	CC	CC	NN	CC	CC	CC	CC	CC	CC	CC	CC	NN	CC	CC	NN
14075500|F|0-6:A>G-6:A>G	A/G	VU02	28613070	+	NA	NA	NA	NA	NA	NA	GG	GG	AA	AA	AA	AA	AA	GG	AA	AA	AA	AA	AA	AA	AA	AA	AA	GG	AA	AA	AA	AA	AA	AA	AA	AA	GG	AA	AA	AA	AA	AA	AA	AA	AA	NN	AA	AA	GG
14077145|F|0-54:T>C-54:T>C	T/C	VU02	28619217	+	NA	NA	NA	NA	NA	NA	CC	CC	TT	TT	TT	TT	TT	CC	CT	TT	TT	TT	TT	TT	TT	TT	TT	CC	TT	TT	TT	TT	TT	CT	TT	TT	CC	TT	TT	TT	TT	TT	TT	TT	TT	CC	TT	TT	CC
35152782|F|0-32:A>G-32:A>G	A/G	VU02	28624583	+	NA	NA	NA	NA	NA	NA	AG	AG	AA	AA	AA	AA	AA	AA	AA	AA	AA	AA	AA	AA	AA	AA	AA	AG	AA	AA	AA	AA	AA	AG	AA	AA	GG	AA	AA	AA	AA	AA	AA	AA	AA	AA	AA	AA	GG
14076621|F|0-52:G>T-52:G>T	G/T	VU02	28646794	+	NA	NA	NA	NA	NA	NA	TT	TT	GG	GG	GG	GG	GG	TT	GG	GG	GG	GG	GG	GG	GG	GG	GG	TT	GG	GG	GG	GG	GG	GT	GG	GG	TT	GG	GG	GG	GG	GG	GG	GG	GG	TT	GG	GG	TT
14086070|F|0-41:A>G-41:A>G	G/A	VU02	28704512	+	NA	NA	NA	NA	NA	NA	AA	AA	AA	GG	GG	GG	GG	AA	GG	GG	GG	GG	GG	GG	GG	GG	GG	AA	GG	GG	AA	AG	GG	GG	GG	GG	AA	GG	GG	GG	GG	GG	GG	GG	AA	AA	AA	GG	AA
42215618|F|0-24:C>T-24:C>T	C/T	VU02	28707271	+	NA	NA	NA	NA	NA	NA	CC	CC	CC	CC	CC	CC	CC	CC	CC	CC	CC	CC	CC	CC	CC	CC	CC	CC	CC	CC	CC	CC	CC	CC	CC	CC	CC	CC	CC	NN	CC	CC	CC	NN	CC	CC	CC	CC	CC
25356461|F|0-12:A>T-12:A>T	A/T	VU02	28710837	+	NA	NA	NA	NA	NA	NA	TT	TT	TT	AA	AA	AA	AA	TT	AA	AA	AA	AA	AA	AA	AA	AA	AA	TT	AA	AA	TT	AA	AA	AA	AA	AA	TT	AA	AA	AA	AA	AA	AA	AA	TT	TT	TT	AA	TT
35152992|F|0-50:C>T-50:C>T	T/C	VU02	28710903	+	NA	NA	NA	NA	NA	NA	CC	CC	CC	TT	TT	TT	TT	CC	TT	TT	TT	TT	TT	TT	TT	TT	TT	CC	TT	TT	CC	TT	TT	TT	TT	TT	CC	TT	TT	TT	TT	TT	TT	TT	CC	CC	CC	TT	CC
35155020|F|0-12:T>A-12:T>A	T/A	VU02	28776683	+	NA	NA	NA	NA	NA	NA	NN	NN	NN	TT	TT	TT	TT	NN	TT	TT	TT	TT	TT	NN	TT	TT	AT	NN	TT	TT	NN	NN	TT	TT	TT	TT	NN	TT	TT	TT	TT	TT	TT	TT	NN	NN	NN	AA	NN
35155020|F|0-35:C>A-35:C>A	C/A	VU02	28776683	+	NA	NA	NA	NA	NA	NA	AA	AA	AA	CC	CC	CC	CC	AA	CC	CC	CC	CC	CC	NN	CC	CC	CC	AA	CC	CC	AA	NN	CC	CC	CC	CC	AA	CC	CC	CC	CC	CC	CC	CC	AA	NN	AA	NN	AA
14075930|F|0-65:C>T-65:C>T	C/T	VU02	28887778	+	NA	NA	NA	NA	NA	NA	CC	CC	CC	CC	CC	CC	CC	CC	CC	CC	CC	CC	CC	CC	CC	CC	CC	CC	CC	CC	CC	CC	CC	CT	CC	CC	CC	CC	CC	CC	CC	CC	CC	CC	CC	CC	CC	CC	CC
14085948|F|0-56:T>C-56:T>C	T/C	VU02	28887844	+	NA	NA	NA	NA	NA	NA	CC	TT	TT	TT	TT	TT	TT	TT	TT	TT	TT	TT	TT	TT	TT	TT	TT	TT	TT	TT	CT	TT	TT	NN	CC	TT	CC	TT	NN	TT	TT	TT	TT	TT	TT	NN	TT	TT	TT
100011154|F|0-45:A>T-45:A>T	A/T	VU02	28952853	+	NA	NA	NA	NA	NA	NA	AA	AA	AA	AA	AA	AA	AA	AA	AA	AA	AA	AA	AA	AA	AA	AA	AA	AA	AA	AA	AA	AA	AA	AA	AA	AA	AA	AA	AA	AA	AA	AA	AA	AA	AA	AA	AA	AA	AA
28497422|F|0-44:A>G-44:A>G	A/G	VU02	28999295	+	NA	NA	NA	NA	NA	NA	AA	AA	AA	AA	AA	AA	AA	NN	AA	AA	AA	AA	AA	GG	AA	GG	AA	AA	GG	AA	AG	GG	AA	AA	AA	AA	AA	GG	AA	AA	AA	AA	AA	AG	AA	AA	AA	AA	AA
100048998|F|0-31:T>G-31:T>G	T/G	VU02	29058178	+	NA	NA	NA	NA	NA	NA	TT	TT	TT	TT	TT	TT	TT	TT	TT	TT	TT	TT	NN	NN	TT	NN	TT	TT	NN	TT	TT	NN	TT	TT	TT	NN	TT	NN	TT	TT	TT	TT	TT	TT	TT	NN	TT	TT	TT
14076499|F|0-45:G>T-45:G>T	G/T	VU02	29058724	+	NA	NA	NA	NA	NA	NA	GG	GG	GG	GG	GG	GG	GG	GG	GG	GG	GG	GG	GG	TT	GG	TT	GG	GG	TT	GG	GG	TT	GG	GG	GG	GG	GG	TT	GG	GG	GG	GG	GG	GG	GG	GG	GG	GG	GG
14076499|F|0-68:C>A-68:C>A	C/A	VU02	29058724	+	NA	NA	NA	NA	NA	NA	CC	CC	CC	CC	CC	CC	CC	CC	CC	CC	CC	CC	CC	AA	CC	AA	CC	CC	AA	CC	CC	AA	CC	CC	CC	CC	CC	NN	CC	CC	CC	CC	CC	CC	CC	CC	CC	CC	CC
14079992|F|0-24:G>A-24:G>A	G/A	VU02	29058959	+	NA	NA	NA	NA	NA	NA	GG	GG	GG	GG	GG	GG	GG	GG	GG	GG	GG	GG	GG	AA	GG	AA	GG	GG	AA	GG	GG	AA	GG	GG	GG	GG	GG	AA	GG	GG	GG	GG	GG	GG	GG	GG	GG	GG	GG
100011674|F|0-8:C>A-8:C>A	C/A	VU02	29059177	+	NA	NA	NA	NA	NA	NA	CC	CC	CC	CC	CC	CC	CC	CC	CC	CC	CC	CC	CC	CC	CC	CC	CC	CC	CC	CC	CC	CC	CC	CC	CC	CC	CC	CC	CC	CC	CC	CC	CC	CC	CC	NN	CC	CC	CC
100010691|F|0-31:T>C-31:T>C	T/C	VU02	29131091	+	NA	NA	NA	NA	NA	NA	TT	TT	TT	TT	TT	TT	TT	TT	TT	TT	TT	TT	NN	TT	TT	TT	TT	TT	TT	TT	TT	TT	TT	TT	NN	TT	TT	TT	TT	TT	TT	TT	TT	TT	TT	TT	TT	TT	TT
25355937|F|0-59:T>C-59:T>C	T/C	VU02	29240184	+	NA	NA	NA	NA	NA	NA	TT	TT	TT	TT	TT	TT	TT	TT	TT	CC	TT	CC	CC	TT	CC	CC	TT	TT	CT	TT	TT	CT	TT	TT	TT	CC	TT	CC	CC	TT	TT	CC	CC	TT	TT	TT	TT	TT	TT
100008384|F|0-33:G>C-33:G>C	G	VU02	29305496	+	NA	NA	NA	NA	NA	NA	GG	GG	GG	GG	GG	GG	GG	GG	GG	GG	GG	GG	GG	GG	GG	GG	GG	GG	GG	GG	GG	GG	GG	GG	GG	NN	GG	GG	GG	GG	GG	GG	GG	GG	GG	GG	GG	GG	GG
25366136|F|0-16:G>T-16:G>T	G/T	VU02	29423826	+	NA	NA	NA	NA	NA	NA	GG	GG	GG	GG	GG	TT	GG	GG	GG	GG	GG	GG	GG	GG	GG	GG	GG	GG	GG	GG	GG	GG	GG	GG	GG	GG	GG	GG	GG	GG	GG	GG	GG	GG	GG	GG	GG	GG	GG
28497339|F|0-19:G>A-19:G>A	G/A	VU02	29480428	+	NA	NA	NA	NA	NA	NA	GG	GG	GG	AA	GG	GG	AG	GG	GG	GG	GG	GG	GG	GG	GG	GG	GG	GG	AG	GG	GG	GG	GG	GG	GG	GG	GG	AA	GG	GG	GG	GG	GG	GG	GG	GG	GG	AA	GG
14075529|F|0-26:G>A-26:G>A	A/G	VU02	29528108	+	NA	NA	NA	NA	NA	NA	AA	AA	AA	AA	AA	AA	AA	AA	AA	AA	GG	AA	AA	AA	AA	NN	AA	AA	AA	AA	AA	GG	AA	NN	NN	AA	AA	AA	AA	AA	AA	NN	AA	AA	AA	AA	NN	AA	AA
14084428|F|0-37:C>T-37:C>T	C/T	VU02	29587725	+	NA	NA	NA	NA	NA	NA	TT	TT	CC	CC	CC	CC	CC	CT	TT	CC	CC	CC	CC	CC	CC	CC	CC	CC	CC	CC	CC	CC	CC	TT	TT	CC	TT	CC	CC	CC	CC	CC	CC	CC	TT	CC	CC	TT	CC
14075569|F|0-59:A>G-59:A>G	G/A	VU02	29652267	+	NA	NA	NA	NA	NA	NA	AA	AA	AA	GG	GG	GG	GG	AA	AG	GG	GG	GG	GG	GG	GG	GG	AG	AA	GG	GG	AA	AG	GG	AA	AA	GG	AA	GG	GG	GG	GG	GG	GG	GG	AA	GG	AA	AA	GG
14075762|F|0-21:C>A-21:C>A	C/A	VU02	29653533	+	NA	NA	NA	NA	NA	NA	AA	AA	AA	CC	CC	CC	CC	AA	AA	CC	CC	CC	CC	CC	NN	CC	CC	AA	CC	CC	AA	NN	CC	AA	AA	CC	AA	NN	CC	CC	CC	CC	NN	CC	AA	NN	AA	AA	NN
25353615|F|0-15:T>A-15:T>A	T	VU02	29726574	+	NA	NA	NA	NA	NA	NA	TT	TT	TT	TT	TT	TT	TT	TT	TT	TT	TT	TT	TT	TT	TT	TT	TT	TT	TT	TT	TT	TT	TT	TT	TT	TT	TT	TT	TT	TT	TT	TT	TT	TT	TT	TT	TT	TT	TT
25357117|F|0-21:C>T-21:C>T	T/C	VU02	29741597	+	NA	NA	NA	NA	NA	NA	CC	TT	TT	TT	CC	TT	TT	TT	TT	TT	TT	TT	TT	TT	TT	CC	TT	TT	TT	CC	TT	TT	CC	TT	TT	TT	TT	TT	TT	CC	TT	TT	TT	CC	TT	CC	TT	TT	TT
25355854|F|0-33:T>C-33:T>C	T	VU02	29768068	+	NA	NA	NA	NA	NA	NA	TT	TT	TT	TT	TT	TT	TT	TT	TT	TT	TT	TT	TT	TT	TT	NN	TT	NN	TT	NN	TT	TT	TT	TT	TT	TT	TT	TT	TT	NN	TT	NN	TT	NN	TT	NN	TT	TT	TT
35153230|F|0-39:T>A-39:T>A	T/A	VU02	29904447	+	NA	NA	NA	NA	NA	NA	TT	TT	TT	TT	TT	TT	TT	TT	TT	TT	AA	TT	TT	NN	TT	TT	TT	AA	TT	NN	TT	TT	TT	TT	TT	TT	TT	TT	TT	NN	TT	TT	TT	TT	TT	NN	TT	TT	TT
14057023|F|0-35:C>G-35:C>G	C/G	VU02	29934086	+	NA	NA	NA	NA	NA	NA	CC	CC	CC	GG	CC	CC	GG	CC	CC	CC	CC	GG	CC	CC	CC	CC	CC	CC	GG	CC	CC	CC	CC	CC	CC	CC	CC	CC	GG	GC	CC	GG	GG	CC	CC	NN	CC	NN	CC
25355876|F|0-68:G>A-68:G>A	G/A	VU02	29943264	+	NA	NA	NA	NA	NA	NA	GG	GG	GG	AA	GG	GG	AA	GG	GG	GG	GG	AA	GG	GG	GG	GG	GG	GG	AG	GG	GG	GG	GG	GG	GG	GG	GG	GG	AA	AA	GG	AA	AA	GG	GG	GG	GG	GG	GG
14076697|F|0-53:C>A-53:C>A	C/A	VU02	30034734	+	NA	NA	NA	NA	NA	NA	AA	CC	CC	CC	CC	AA	CC	AA	AA	CC	CC	AA	CC	CC	CC	CC	AC	AA	CC	AA	CC	CC	AA	CC	NN	CC	AA	CC	AA	AA	CC	AA	NN	AA	CC	AA	NN	CC	CC
35153637|F|0-36:A>T-36:A>T	T/A	VU02	30043214	+	NA	NA	NA	NA	NA	NA	TT	TT	TT	TT	TT	TT	TT	TT	TT	TT	TT	TT	TT	TT	AA	TT	TT	TT	TT	TT	TT	TT	TT	TT	TT	AA	TT	TT	TT	TT	TT	TT	TT	TT	TT	TT	TT	TT	TT
14055154|F|0-41:G>C-41:G>C	G/C	VU02	30085082	+	NA	NA	NA	NA	NA	NA	GG	GG	GG	GG	GG	GG	GG	GG	GG	CC	GG	GG	GG	GG	GG	GG	GG	GG	GG	GG	GG	GG	GG	GG	GG	GG	GG	CC	GG	GG	GG	GG	GG	GG	GG	GG	GG	GG	GG
35152898|F|0-37:T>C-37:T>C	T/C	VU02	30410468	+	NA	NA	NA	NA	NA	NA	TT	TT	TT	TT	TT	TT	TT	TT	TT	TT	CC	TT	TT	TT	NN	CC	TT	TT	TT	TT	TT	TT	TT	TT	TT	TT	TT	TT	TT	TT	TT	TT	TT	TT	TT	NN	TT	TT	TT
14077489|F|0-50:G>A-50:G>A	A/G	VU02	30413865	+	NA	NA	NA	NA	NA	NA	AA	AA	AA	AA	AA	AA	AA	AA	AA	AA	GG	AA	AA	AA	AA	GG	AA	AA	AA	AA	AA	AA	AA	AA	AA	AA	AA	AA	AA	AA	AA	AA	AA	AA	AA	AA	AA	AA	AA
14085595|F|0-10:C>T-10:C>T	C	VU02	30475283	+	NA	NA	NA	NA	NA	NA	CC	CC	CC	CC	CC	CC	CC	CC	CC	CC	CC	CC	CC	CC	CC	CC	CC	CC	CC	CC	CC	CC	CC	CC	CC	CC	CC	CC	CC	CC	CC	CC	CC	CC	CC	CC	CC	CC	CC
14059004|F|0-8:G>T-8:G>T	G/T	VU02	30606491	+	NA	NA	NA	NA	NA	NA	GG	GG	GG	TT	GG	GG	TT	GG	GG	GG	GG	GG	GG	GG	GG	GG	GG	GG	GG	GG	GG	GG	GG	GG	GG	GG	GG	GG	GG	GG	GG	GG	GG	GG	GG	NN	GG	GG	GG
14076382|F|0-65:C>G-65:C>G	C/G	VU02	30887167	+	NA	NA	NA	NA	NA	NA	CC	CC	CC	CC	CC	CC	CC	CC	CC	CC	CC	CC	CC	CC	CC	CC	CC	CC	CC	CC	CC	CC	CC	CC	CC	CC	CC	CC	CC	GC	CC	CC	CC	CC	CC	CC	CC	CC	CC
35153005|F|0-45:A>G-45:A>G	G/A	VU02	30888894	+	NA	NA	NA	NA	NA	NA	GG	GG	GG	GG	GG	GG	GG	NN	GG	GG	GG	GG	GG	GG	GG	GG	GG	GG	GG	NN	GG	NN	GG	GG	GG	GG	GG	NN	GG	GG	GG	NN	GG	GG	GG	GG	GG	NN	GG
35153310|F|0-19:A>G-19:A>G	A/G	VU02	30901069	+	NA	NA	NA	NA	NA	NA	AA	AA	AA	AA	AA	AA	AA	NN	AA	AA	AA	AA	AA	AA	AA	AA	AA	AA	AA	AA	AA	AA	AA	AA	AA	AA	AA	AA	AA	AA	AA	AA	AA	AA	AA	NN	AA	AA	AA
25363025|F|0-12:T>G-12:T>G	T/G	VU02	31050715	+	NA	NA	NA	NA	NA	NA	TT	TT	TT	TT	TT	TT	TT	TT	TT	TT	TT	TT	TT	TT	TT	TT	GT	TT	TT	TT	TT	TT	TT	TT	TT	TT	TT	TT	TT	TT	TT	TT	TT	TT	TT	NN	TT	TT	TT
25352727|F|0-45:A>C-45:A>C	A/C	VU02	31223244	+	NA	NA	NA	NA	NA	NA	AA	AA	AA	AA	AA	AA	AA	AA	AA	AA	AA	AA	AA	AA	AA	AA	AA	AA	AA	AA	AA	AC	AA	AA	AA	AA	AA	AA	AA	AA	AA	AA	AA	AA	AA	AA	AA	AA	AA
25354540|F|0-68:T>G-68:T>G	T/G	VU02	31234836	+	NA	NA	NA	NA	NA	NA	TT	TT	GG	TT	TT	TT	TT	TT	TT	TT	TT	TT	GG	TT	TT	GG	TT	TT	TT	TT	GG	GG	TT	TT	TT	TT	TT	TT	TT	TT	TT	TT	TT	TT	TT	TT	TT	TT	TT
14054491|F|0-56:T>C-56:T>C	T/C	VU02	31287393	+	NA	NA	NA	NA	NA	NA	TT	TT	TT	TT	TT	TT	TT	TT	TT	TT	TT	TT	TT	TT	TT	TT	TT	TT	TT	TT	TT	TT	TT	TT	TT	TT	TT	TT	TT	TT	TT	CT	TT	TT	TT	TT	TT	TT	TT
25354982|F|0-48:G>C-48:G>C	G/C	VU02	31354652	+	NA	NA	NA	NA	NA	NA	GG	GG	CC	GG	GG	GG	GG	GG	GG	GG	GG	GG	CC	CC	GG	CC	GG	GG	CC	GG	CC	CC	GG	GG	GG	GG	GG	CC	GG	GG	GG	GG	GG	GG	GG	GG	GG	GG	GG
25356045|F|0-31:G>A-31:G>A	G/A	VU02	31396667	+	NA	NA	NA	NA	NA	NA	GG	GG	GG	GG	GG	GG	GG	GG	GG	GG	GG	GG	GG	GG	AG	GG	GG	GG	GG	GG	GG	GG	GG	GG	GG	GG	GG	GG	GG	AG	GG	GG	GG	GG	GG	GG	GG	GG	GG
14056940|F|0-46:C>T-46:C>T	C/T	VU02	31429579	+	NA	NA	NA	NA	NA	NA	CC	CC	CC	CC	CC	CC	CC	CC	CC	CC	CC	CC	CC	NN	CC	CC	CC	CC	NN	CC	CC	CC	CC	CC	CC	CC	CC	NN	CC	CC	CC	CC	CC	CC	CC	CC	CC	CC	CC
25363843|F|0-48:C>T-48:C>T	T/C	VU02	31566302	+	NA	NA	NA	NA	NA	NA	CC	CC	TT	TT	CC	TT	TT	CC	CC	TT	TT	TT	TT	TT	TT	TT	CT	CC	TT	CC	TT	TT	CC	CC	CC	TT	CT	TT	TT	CT	CC	TT	TT	CC	CC	CC	TT	CC	CC
14077620|F|0-58:G>A-58:G>A	G/A	VU02	31689370	+	NA	NA	NA	NA	NA	NA	GG	AG	GG	AA	GG	AA	AA	GG	GG	GG	GG	AA	GG	GG	AA	GG	AG	GG	GG	AG	GG	GG	GG	GG	GG	AA	GG	GG	AA	AA	GG	AA	AA	GG	GG	GG	AA	GG	GG
14075738|F|0-25:T>C-25:T>C	C/T	VU02	31731393	+	NA	NA	NA	NA	NA	NA	CC	CC	CC	CC	CC	CC	CC	CC	CC	TT	TT	CC	TT	TT	CC	TT	CC	CC	TT	CC	CC	TT	CC	CC	CC	CC	CC	TT	CC	CC	CC	CC	CC	CC	CC	CC	CC	CC	CC
14060500|F|0-37:T>A-37:T>A	T/A	VU02	31766377	+	NA	NA	NA	NA	NA	NA	TT	AA	AA	AA	TT	AA	AA	TT	TT	TT	TT	AA	TT	TT	AA	TT	TT	TT	TT	TT	AA	AA	TT	TT	TT	AA	TT	TT	AA	AA	TT	AA	AA	TT	TT	TT	AA	TT	TT
14073285|F|0-41:G>A-41:G>A	G/A	VU02	31866319	+	NA	NA	NA	NA	NA	NA	GG	GG	AA	GG	GG	GG	GG	GG	GG	AA	AA	GG	AA	GG	GG	AA	GG	GG	AA	GG	AA	GG	GG	GG	GG	GG	GG	AA	GG	GG	GG	GG	GG	GG	GG	NN	AA	GG	GG
14075396|F|0-20:G>A-20:G>A	G/A	VU02	31866385	+	NA	NA	NA	NA	NA	NA	GG	GG	AA	GG	GG	GG	GG	GG	GG	AA	AA	GG	AA	GG	GG	AA	GG	GG	AA	GG	AA	AG	GG	GG	GG	GG	GG	AA	GG	GG	GG	GG	GG	GG	GG	GG	AA	GG	GG
14077149|F|0-29:T>C-29:T>C	C/T	VU02	31887609	+	NA	NA	NA	NA	NA	NA	CC	CC	TT	CC	CC	CC	CC	CC	CC	TT	TT	TT	TT	CC	CC	TT	CC	CC	TT	CC	TT	CC	CC	CC	CC	CC	CC	TT	CC	CC	CC	CC	TT	CC	CC	CC	TT	CC	CC
14058943|F|0-13:T>A-13:T>A	T/A	VU02	31958133	+	NA	NA	NA	NA	NA	NA	TT	TT	TT	TT	TT	TT	TT	TT	TT	TT	TT	AA	TT	TT	TT	TT	TT	TT	TT	TT	TT	TT	TT	TT	TT	TT	TT	TT	TT	TT	TT	TT	AA	TT	TT	TT	TT	TT	TT
14055923|F|0-18:T>C-18:T>C	T/C	VU02	32058018	+	NA	NA	NA	NA	NA	NA	TT	TT	TT	TT	TT	TT	TT	TT	TT	TT	TT	CC	TT	TT	CC	TT	TT	TT	TT	TT	TT	TT	TT	TT	TT	CC	TT	TT	TT	TT	TT	TT	CC	TT	TT	TT	TT	TT	TT
14073818|F|0-39:A>G-39:A>G	A/G	VU02	32059308	+	NA	NA	NA	NA	NA	NA	AA	AA	AA	AA	GG	AA	AA	AA	AA	AA	AA	AA	AA	AA	AA	AA	AA	GG	AA	AA	AA	AA	AA	AA	AA	AA	AA	AA	AA	AA	AA	AA	AA	AA	AA	AA	AA	AA	AA
14082571|F|0-46:C>G-46:C>G	G/C	VU02	32065034	+	NA	NA	NA	NA	NA	NA	GG	GG	GG	GG	GG	GG	GG	GG	GG	GG	GG	GG	GG	GG	GG	GG	GG	CC	GG	GG	GG	GG	GG	GG	GG	GG	GG	GG	GG	GG	GG	GG	GG	CC	GG	GG	GG	GG	GG
14073858|F|0-52:G>C-52:G>C	G/C	VU02	32087168	+	NA	NA	NA	NA	NA	NA	GG	GG	GG	GG	GG	GG	GG	GG	GG	GG	GG	GG	GG	GG	GG	GG	GG	CC	GG	GG	GG	GG	GG	GG	GG	GG	GG	GG	GG	GG	GG	GG	GG	CC	GG	GG	GG	GG	GG
14075956|F|0-19:G>A-19:G>A	A/G	VU02	32128614	+	NA	NA	NA	NA	NA	NA	AA	AG	AA	AA	AA	AA	AA	GG	AA	AA	AA	AA	AA	AA	AA	AA	AA	GG	AA	GG	AA	AA	GG	AG	AA	AA	AA	NN	AA	NN	GG	AA	NN	GG	AA	GG	AA	NN	NN
100008960|F|0-47:A>T-47:A>T	T/A	VU02	32207990	+	NA	NA	NA	NA	NA	NA	TT	TT	TT	TT	TT	TT	TT	TT	TT	TT	TT	TT	TT	TT	TT	TT	TT	TT	TT	TT	TT	TT	TT	TT	TT	TT	TT	TT	NN	TT	TT	TT	TT	TT	TT	NN	TT	TT	TT
25363005|F|0-47:C>A-47:C>A	C/A	VU02	32271719	+	NA	NA	NA	NA	NA	NA	CC	CC	CC	CC	CC	CC	AA	CC	CC	CC	CC	AA	CC	CC	AA	CC	CC	CC	CC	CC	CC	CC	CC	CC	CC	AA	CC	CC	AA	CC	CC	CC	AA	CC	CC	CC	CC	CC	CC
35152954|F|0-63:A>G-63:A>G	G/A	VU02	32342062	+	NA	NA	NA	NA	NA	NA	GG	GG	GG	GG	GG	GG	GG	GG	GG	GG	GG	AA	GG	GG	AA	GG	GG	GG	GG	GG	GG	GG	GG	GG	GG	GG	GG	GG	GG	GG	GG	GG	AA	GG	GG	GG	GG	GG	GG
25353253|F|0-59:T>A-59:T>A	T/A	VU02	32359397	+	NA	NA	NA	NA	NA	NA	TT	TT	TT	TT	TT	TT	TT	TT	TT	TT	TT	AA	TT	TT	AA	TT	TT	TT	TT	TT	TT	TT	TT	TT	TT	TT	TT	TT	TT	TT	TT	TT	AA	TT	TT	TT	TT	TT	TT
28202912|F|0-24:A>G-24:A>G	A/G	VU02	32538366	+	NA	NA	NA	NA	NA	NA	AA	AA	AA	GG	AA	AA	GG	AA	AA	AA	AA	GG	AA	AA	GG	AA	AA	AA	AG	AA	AA	AA	AA	AA	AA	AA	AA	AA	GG	GG	AA	GG	GG	AA	AA	AA	AA	AA	AA
14055870|F|0-21:C>T-21:C>T	C/T	VU02	32612490	+	NA	NA	NA	NA	NA	NA	CC	CC	CC	CC	CC	CC	CC	CC	CC	CC	CC	CC	CC	CC	CC	CC	CC	CC	CC	CC	CC	CC	CC	CC	CC	CC	CC	CC	CC	CC	CC	CC	CC	CC	CC	NN	CC	CC	CC
35152976|F|0-53:T>G-53:T>G	G/T	VU02	32722490	+	NA	NA	NA	NA	NA	NA	GG	GG	GG	TT	GG	GG	TT	GG	GG	GG	GG	TT	GG	GG	TT	GG	GG	GG	GG	GG	GG	GG	GG	GG	GG	GG	GG	GG	TT	TT	GG	TT	TT	GG	GG	NN	GG	GG	GG
14084760|F|0-17:T>A-17:T>A	A/T	VU02	32748520	+	NA	NA	NA	NA	NA	NA	AA	TT	AA	AA	AA	TT	AA	TT	AA	AA	AA	AA	AA	AA	AA	TT	TT	AA	AA	AA	AA	AA	AA	AT	AA	AA	TT	AA	AA	AA	AA	AA	AA	AA	AA	AA	AA	TT	AA
14081962|F|0-26:A>C-26:A>C	C/A	VU02	32748586	+	NA	NA	NA	NA	NA	NA	CC	AA	CC	AA	CC	AA	AA	AA	CC	CC	CC	AA	CC	CC	AA	AA	AA	CC	CC	CC	CC	AC	CC	AC	CC	CC	AA	CC	AA	AA	CC	AA	AA	CC	CC	CC	CC	AA	CC
14077020|F|0-41:T>A-41:T>A	T/A	VU02	32762425	+	NA	NA	NA	NA	NA	NA	TT	AA	TT	AA	TT	AA	AA	AA	TT	TT	TT	AA	TT	TT	AA	AA	AA	TT	TT	TT	TT	TT	TT	AT	TT	TT	AA	TT	AA	AA	TT	AA	AA	TT	TT	TT	TT	AA	TT
14087100|F|0-47:T>C-47:T>C	T/C	VU02	32771423	+	NA	NA	NA	NA	NA	NA	TT	CC	TT	TT	TT	CC	TT	CC	TT	TT	TT	TT	TT	TT	TT	CC	CT	TT	TT	TT	TT	TT	TT	CT	TT	TT	TT	TT	TT	TT	TT	TT	TT	TT	TT	TT	TT	CC	TT
14087100|F|0-65:C>A-65:C>A	C/A	VU02	32771423	+	NA	NA	NA	NA	NA	NA	CC	AA	CC	CC	CC	AA	CC	NN	CC	CC	CC	CC	CC	CC	CC	AA	AC	CC	CC	CC	CC	CC	CC	AC	CC	CC	CC	CC	CC	CC	CC	CC	CC	CC	CC	CC	CC	AA	CC
25356999|F|0-32:C>T-32:C>T	C/T	VU02	32829987	+	NA	NA	NA	NA	NA	NA	CC	CC	CC	TT	CC	CC	CC	CC	CC	CC	CC	CC	CC	CC	TT	CC	CC	CC	CC	CC	CC	CC	CC	CC	CC	CC	CC	CC	CC	TT	CC	TT	CC	CC	CC	CC	CC	CC	CC
14076796|F|0-55:G>A-55:G>A	A/G	VU02	32847707	+	NA	NA	NA	NA	NA	NA	AA	AA	AA	GG	AA	GG	GG	AA	AA	AA	AA	GG	AA	AA	GG	GG	GG	AA	AA	AA	AA	AA	AA	GG	GG	AA	GG	NN	GG	GG	NN	GG	GG	AA	AA	AA	NN	GG	GG
25353181|F|0-10:G>A-10:G>A	G/A	VU02	32896090	+	NA	NA	NA	NA	NA	NA	GG	GG	GG	AA	GG	GG	GG	GG	GG	GG	GG	AA	GG	GG	GG	GG	GG	GG	GG	GG	GG	GG	GG	GG	GG	GG	GG	GG	AA	AA	GG	AA	AA	GG	GG	GG	GG	GG	GG
35153865|F|0-21:G>A-21:G>A	G/A	VU02	32999079	+	NA	NA	NA	NA	NA	NA	GG	GG	AA	GG	GG	AA	GG	GG	GG	AA	AA	GG	GG	GG	GG	AA	AG	GG	GG	GG	AA	GG	GG	GG	GG	GG	GG	NN	NN	GG	GG	GG	GG	GG	GG	GG	GG	NN	GG
14073957|F|0-22:A>G-22:A>G	A/G	VU02	32999273	+	NA	NA	NA	NA	NA	NA	AA	AA	GG	AA	AA	GG	AA	AA	AA	GG	GG	AA	AA	AA	AA	GG	AG	AA	AA	AA	GG	AG	AA	AA	AA	AA	AA	AA	AA	AA	AA	AA	AA	AA	AA	AA	AA	GG	AA
28203492|F|0-47:T>C-47:T>C	T/C	VU02	33019098	+	NA	NA	NA	NA	NA	NA	TT	TT	TT	TT	TT	TT	TT	TT	NN	TT	TT	TT	TT	TT	TT	TT	TT	TT	TT	TT	TT	TT	TT	TT	NN	TT	TT	TT	TT	TT	TT	TT	NN	TT	NN	TT	TT	TT	NN
25353424|F|0-5:A>C-5:A>C	A/C	VU02	33040875	+	NA	NA	NA	NA	NA	NA	AA	AA	AA	AA	AA	AA	AA	AA	AA	AA	AA	AA	AA	AA	AA	AA	AA	AA	AA	AA	AA	AA	AA	AA	AA	AA	AA	AA	AA	AA	AA	AA	AA	AA	AA	AA	AA	AA	AA
25354492|F|0-11:A>G-11:A>G	A/G	VU02	33051891	+	NA	NA	NA	NA	NA	NA	AA	AA	AA	AA	AA	GG	AA	AA	AA	GG	GG	AA	GG	GG	AA	AA	AG	AA	AA	AA	AA	GG	AA	AA	AA	AA	AA	AA	AA	AG	AA	AA	AA	AA	AA	AA	AA	GG	AA
14081031|F|0-33:T>G-33:T>G	G/T	VU02	33052564	+	NA	NA	NA	NA	NA	NA	GG	GG	GG	GG	GG	TT	GG	GG	GG	TT	TT	GG	TT	TT	GG	GG	GT	GG	GG	GG	GG	TT	GG	GG	GG	GG	GG	GG	GG	GG	GG	GG	GG	GG	GG	GG	GG	TT	GG
14074986|F|0-39:G>A-39:G>A	G/A	VU02	33087252	+	NA	NA	NA	NA	NA	NA	GG	GG	AA	GG	GG	GG	GG	GG	GG	GG	GG	GG	GG	GG	GG	AA	GG	GG	GG	GG	AA	GG	GG	GG	GG	GG	GG	GG	GG	GG	GG	GG	GG	GG	GG	GG	GG	GG	GG
35153747|F|0-35:A>G-35:A>G	G	VU02	33112524	+	NA	NA	NA	NA	NA	NA	GG	GG	GG	GG	GG	NN	GG	GG	GG	GG	GG	GG	GG	GG	GG	GG	NN	GG	GG	GG	GG	GG	GG	GG	GG	GG	GG	GG	GG	GG	GG	GG	GG	GG	GG	GG	GG	NN	GG
14083480|F|0-41:A>G-41:A>G	A/G	VU02	33116747	+	NA	NA	NA	NA	NA	NA	AA	AA	AA	AA	AA	AA	AA	AA	AA	AA	AA	AA	AA	AA	AA	AG	AA	AA	AA	AA	AA	AA	AA	AA	AA	AA	AA	AA	AA	AA	AA	AA	AA	AA	AA	AA	AA	AA	AA
14058509|F|0-65:C>A-65:C>A	C/A	VU02	33117632	+	NA	NA	NA	NA	NA	NA	CC	CC	CC	CC	CC	NN	CC	CC	CC	CC	CC	CC	CC	CC	CC	CC	CC	CC	CC	CC	CC	CC	CC	CC	CC	CC	CC	CC	CC	CC	CC	CC	CC	CC	NN	NN	CC	CC	CC
14058814|F|0-33:C>G-33:C>G	C	VU02	33120262	+	NA	NA	NA	NA	NA	NA	CC	CC	CC	CC	CC	CC	CC	CC	CC	CC	CC	CC	CC	CC	CC	CC	CC	CC	CC	CC	CC	CC	CC	CC	CC	CC	CC	CC	CC	CC	CC	CC	CC	CC	CC	CC	CC	CC	CC
14084783|F|0-40:G>C-40:G>C	C/G	VU02	33121719	+	NA	NA	NA	NA	NA	NA	CC	CC	CC	CC	CC	GG	CC	CC	CC	CC	CC	CC	CC	CC	CC	CC	GC	CC	CC	CC	CC	CC	CC	CC	CC	CC	CC	CC	CC	CC	CC	CC	CC	CC	CC	CC	CC	GG	CC
28203414|F|0-13:C>T-13:C>T	C/T	VU02	33121719	+	NA	NA	NA	NA	NA	NA	CC	CC	CC	CC	CC	CT	CC	CC	CC	CC	CC	CC	CC	CC	CC	CC	CT	CC	CC	CC	CC	CC	CC	CC	CC	CC	CC	CC	CC	CC	CC	CC	CC	CC	CC	CC	CC	CT	CC
14074586|F|0-16:C>T-16:C>T	C/T	VU02	33123659	+	NA	NA	NA	NA	NA	NA	CC	CC	CC	CC	CC	TT	CC	CC	CC	NN	CC	CC	CC	CC	CC	CC	CT	CC	CC	CC	CC	CC	CC	CC	CC	CC	CC	CC	CC	CC	CC	CC	CC	CC	CC	NN	CC	TT	CC
14084783|F|0-17:C>G-17:C>G	G/C	VU02	33145556	+	NA	NA	NA	NA	NA	NA	GG	GG	GG	GG	GG	GC	GG	NN	GG	GG	GG	GG	GG	GG	GG	GG	GC	GG	GG	GG	GG	GG	GG	GG	GG	GG	GG	GG	GG	GG	GG	GG	GG	GG	GG	NN	GG	GC	GG
14081720|F|0-5:A>G-5:A>G	A/G	VU02	33146774	+	NA	NA	NA	NA	NA	NA	AA	AA	AA	AA	AA	GG	AA	AA	AA	AA	AA	AA	AA	AA	AA	AA	AG	AA	AA	AA	AA	AA	AA	AA	AA	AA	AA	AA	AA	AA	AA	AA	AA	AA	AA	AA	AA	GG	AA
14085509|F|0-35:A>T-35:A>T	A/T	VU02	33154326	+	NA	NA	NA	NA	NA	NA	AA	AA	AA	AA	AA	TT	AA	AA	AA	AA	AA	AA	AA	AA	AA	AA	AT	AA	AA	AA	AA	AA	AA	AA	AA	AA	AA	AA	AA	AA	AA	AA	AA	AA	AA	AA	AA	TT	AA
14075084|F|0-26:C>T-26:C>T	C/T	VU02	33172906	+	NA	NA	NA	NA	NA	NA	CC	CC	CC	CC	TT	TT	CC	CC	CC	CC	CC	CC	CC	CC	CC	CC	CT	CC	CC	CC	CC	NN	CC	CC	CC	CC	CC	CC	CC	CC	CC	NN	CC	CT	CC	NN	CC	TT	CC
14076956|F|0-35:G>A-35:G>A	G/A	VU02	33210403	+	NA	NA	NA	NA	NA	NA	GG	GG	GG	GG	GG	GG	GG	GG	GG	GG	GG	GG	GG	GG	GG	GG	AG	GG	GG	GG	GG	GG	GG	GG	GG	GG	GG	GG	GG	GG	GG	GG	GG	GG	GG	GG	GG	AA	GG
100010908|F|0-65:A>T-65:A>T	T/A	VU02	33210469	+	NA	NA	NA	NA	NA	NA	TT	TT	TT	AA	TT	TT	TT	TT	TT	TT	TT	TT	TT	TT	TT	NN	TT	TT	TT	TT	TT	NN	TT	TT	TT	TT	TT	TT	NN	NN	TT	NN	TT	TT	NN	TT	TT	TT	NN
100010398|F|0-39:G>C-39:G>C	G/C	VU02	33212007	+	NA	NA	NA	NA	NA	NA	GG	GG	GG	CC	GG	GG	GG	GG	GG	GG	GG	GG	GG	GG	GG	GG	GG	GG	GG	GG	GG	GG	GG	GG	GG	GG	GG	GG	GG	GG	GG	GG	GG	GG	GG	NN	GG	GG	GG
14074778|F|0-28:C>T-28:C>T	C/T	VU02	33237281	+	NA	NA	NA	NA	NA	NA	CC	CC	CC	TT	CC	CC	CC	CC	CC	CC	CC	CC	CC	CC	CC	CC	CT	CC	CC	CC	CC	CC	CC	CC	CC	CC	CC	CC	CC	CC	CC	CC	CC	CC	CC	CC	CC	TT	CC
14073804|F|0-41:G>A-41:G>A	G/A	VU02	33237347	+	NA	NA	NA	NA	NA	NA	GG	GG	GG	AA	GG	GG	GG	GG	GG	GG	GG	GG	GG	GG	GG	GG	AG	GG	GG	GG	GG	GG	GG	GG	GG	GG	GG	GG	GG	GG	GG	GG	GG	GG	GG	GG	GG	AA	GG
35153503|F|0-64:T>C-64:T>C	T/C	VU02	33239050	+	NA	NA	NA	NA	NA	NA	TT	TT	TT	TT	TT	TT	TT	TT	TT	TT	TT	TT	TT	TT	TT	TT	CT	NN	TT	TT	TT	TT	TT	TT	NN	TT	NN	TT	TT	TT	NN	NN	TT	TT	TT	NN	NN	NN	TT
14077213|F|0-37:C>A-37:C>A	A/C	VU02	33313969	+	NA	NA	NA	NA	NA	NA	CC	CC	AA	CC	CC	CC	AA	CC	CC	AA	AA	AA	AA	AA	AA	AA	CC	CC	AC	CC	AA	NN	CC	CC	CC	AA	CC	AA	AA	AA	CC	AA	AA	CC	CC	NN	CC	NN	CC
14082328|F|0-50:T>C-50:T>C	T/C	VU02	33325615	+	NA	NA	NA	NA	NA	NA	TT	TT	CC	TT	TT	TT	TT	NN	TT	CC	CC	TT	CC	CT	TT	CC	TT	TT	CC	CC	CC	NN	TT	TT	TT	CC	TT	CC	TT	TT	TT	TT	TT	TT	TT	CC	TT	TT	TT
25366772|F|0-7:G>T-7:G>T	T/G	VU02	33360600	+	NA	NA	NA	NA	NA	NA	TT	TT	TT	TT	TT	TT	TT	TT	TT	TT	TT	TT	TT	TT	TT	TT	GT	TT	TT	TT	TT	TT	TT	TT	TT	TT	TT	TT	TT	TT	TT	TT	TT	TT	TT	TT	GT	GT	TT
35151630|F|0-5:A>T-5:A>T	A/T	VU02	33597664	+	NA	NA	NA	NA	NA	NA	AA	AA	AA	AA	AA	AA	AA	AA	AA	AA	AA	AA	AA	AA	AA	AA	AA	AA	AA	AA	AA	AA	AA	AA	AA	AA	AA	AA	AA	AA	AT	AA	AA	AA	AA	AA	AA	AA	AA
35154797|F|0-24:C>G-24:C>G	G/C	VU02	33607916	+	NA	NA	NA	NA	NA	NA	GG	GG	GG	GG	NN	GC	GG	GG	GG	GG	GG	GG	GG	GG	GG	GG	GC	GG	GG	NN	GG	GG	GG	GG	GG	GC	GG	GG	GG	GG	GG	GG	GG	GG	GG	NN	GG	CC	GG
14076321|F|0-57:C>T-57:C>T	C/T	VU02	33628601	+	NA	NA	NA	NA	NA	NA	CC	TT	CC	CC	CT	CC	CC	CC	CC	CC	CC	CC	CC	CC	CC	CC	CT	CC	CC	CC	CC	CC	CC	TT	CC	CC	CC	CC	CC	CC	CC	CC	CC	CC	CC	CC	TT	TT	CC
14075197|F|0-48:G>A-48:G>A	A/G	VU02	33630594	+	NA	NA	NA	NA	NA	NA	AA	GG	AA	AA	AA	AA	AA	AA	AA	AA	AA	AA	AA	AA	AA	AA	AG	AA	AA	AA	AA	AA	AA	AG	AA	AA	AA	AA	AA	AA	AA	AA	AA	AA	AA	AA	GG	GG	AA
14074048|F|0-6:C>A-6:C>A	C/A	VU02	33632749	+	NA	NA	NA	NA	NA	NA	CC	AA	CC	CC	CC	CC	CC	CC	CC	CC	CC	CC	CC	CC	CC	CC	AC	CC	CC	CC	CC	CC	CC	CC	CC	CC	CC	CC	CC	CC	NN	CC	CC	CC	CC	NN	AA	AA	CC
14078620|F|0-34:T>C-34:T>C	T/C	VU02	33646291	+	NA	NA	NA	NA	NA	NA	TT	CC	TT	TT	TT	TT	TT	TT	TT	TT	TT	TT	TT	TT	TT	TT	CT	TT	TT	TT	TT	TT	TT	CT	TT	TT	TT	TT	TT	TT	TT	TT	TT	TT	TT	TT	CC	CC	TT
44876285|F|0-14:C>T-14:C>T	C	VU02	33663497	+	NA	NA	NA	NA	NA	NA	CC	CC	CC	CC	CC	CC	CC	CC	CC	CC	CC	CC	CC	CC	CC	CC	CC	CC	CC	CC	CC	CC	CC	CC	CC	CC	CC	CC	CC	CC	CC	CC	CC	CC	CC	CC	CC	CC	CC
14075893|F|0-19:A>G-19:A>G	A/G	VU02	33679348	+	NA	NA	NA	NA	NA	NA	AA	AA	AA	AA	AA	AA	AA	AA	AA	AA	AA	AA	AA	AA	AA	AA	AG	AA	AA	AA	AA	AA	AA	AG	AA	AA	AA	AA	AA	AA	AA	AA	AA	AA	AA	AA	GG	GG	AA
28203175|F|0-59:A>T-59:A>T	T/A	VU02	33700390	+	NA	NA	NA	NA	NA	NA	TT	TT	TT	TT	TT	TT	TT	TT	TT	TT	TT	TT	TT	TT	TT	TT	TT	TT	TT	TT	TT	TT	TT	AT	TT	TT	NN	TT	TT	TT	TT	TT	TT	TT	TT	TT	AA	AA	TT
28203099|F|0-21:A>G-21:A>G	G/A	VU02	33737593	+	NA	NA	NA	NA	NA	NA	GG	GG	GG	GG	GG	GG	GG	GG	GG	GG	GG	GG	GG	GG	GG	GG	AG	GG	GG	GG	GG	GG	GG	AG	GG	GG	GG	GG	GG	GG	GG	GG	GG	GG	GG	GG	AA	AA	GG
14085730|F|0-39:A>G-39:A>G	A/G	VU02	33825352	+	NA	NA	NA	NA	NA	NA	AA	AA	GG	AA	AA	AA	AA	AA	AA	AA	AA	AA	GG	AA	AA	AA	AG	AG	AA	AA	GG	AG	AA	AA	AA	GG	AA	AA	AA	AG	AG	AA	AA	AA	AA	AA	GG	GG	AA
35153537|F|0-25:G>A-25:G>A	A/G	VU02	33875149	+	NA	NA	NA	NA	NA	NA	AA	AA	AA	AA	AA	AA	AA	AA	AA	AA	AA	AA	AA	AA	AA	AA	AA	AA	AA	AA	AA	AA	AA	GG	AA	AA	AA	AA	AA	AA	AA	AA	AA	AA	AA	AA	AA	AA	AA
14077773|F|0-16:C>T-16:C>T	C/T	VU03	52287	+	NA	NA	NA	NA	NA	NA	CC	CC	CC	CC	CC	CC	CC	CC	CC	CC	CC	CC	CC	CC	CC	CC	CC	CC	CC	CC	CC	CC	CC	CC	CC	CC	CC	CC	CC	CC	CC	CC	CC	CC	CC	CC	CC	CC	CC
14074375|F|0-6:G>T-6:G>T	G/T	VU03	75896	+	NA	NA	NA	NA	NA	NA	GG	GG	GG	GG	GG	TT	GG	GG	GG	GG	GG	GG	GG	GG	GG	GG	GG	GG	GG	GG	GG	GG	GG	GG	GG	GG	GG	GG	GG	GG	GG	GG	GG	TT	GG	GG	GG	GG	GG
14084108|F|0-39:T>C-39:T>C	T/C	VU03	104206	+	NA	NA	NA	NA	NA	NA	NN	TT	TT	TT	NN	CC	TT	TT	TT	TT	TT	TT	TT	TT	TT	TT	TT	TT	TT	TT	TT	TT	TT	TT	TT	TT	TT	TT	TT	TT	TT	TT	TT	CC	TT	TT	TT	TT	TT
14084108|F|0-8:G>A-8:G>A	G/A	VU03	104206	+	NA	NA	NA	NA	NA	NA	NN	GG	GG	GG	AA	NN	GG	GG	GG	GG	GG	GG	GG	GG	GG	GG	GG	GG	GG	GG	GG	GG	GG	GG	GG	GG	GG	GG	GG	GG	GG	GG	GG	NN	GG	GG	GG	GG	GG
42215833|F|0-14:G>C-14:G>C	C	VU03	112977	+	NA	NA	NA	NA	NA	NA	CC	CC	CC	CC	CC	NN	CC	CC	CC	CC	CC	NN	CC	CC	CC	CC	CC	CC	CC	CC	CC	CC	CC	CC	CC	NN	CC	CC	CC	CC	CC	CC	CC	NN	CC	CC	CC	CC	CC
42215834|F|0-46:T>C-46:T>C	T/C	VU03	112977	+	NA	NA	NA	NA	NA	NA	TT	TT	TT	TT	TT	CC	TT	TT	TT	TT	TT	NN	TT	TT	TT	TT	TT	TT	TT	TT	TT	TT	TT	TT	TT	NN	TT	TT	TT	TT	TT	TT	TT	CC	TT	TT	TT	TT	TT
42215776|F|0-6:C>G-6:C>G	G	VU03	113043	+	NA	NA	NA	NA	NA	NA	GG	GG	GG	GG	GG	NN	GG	GG	GG	GG	GG	GG	GG	GG	GG	GG	GG	GG	GG	GG	GG	GG	GG	GG	GG	GG	GG	GG	GG	GG	GG	GG	GG	NN	GG	GG	GG	GG	GG
42774839|F|0-35:A>G-35:A>G	A/G	VU03	113043	+	NA	NA	NA	NA	NA	NA	AA	AA	AG	AA	AA	GG	AA	AA	AA	AA	AA	AA	AA	AA	AA	AA	AA	AA	AA	AA	AA	AA	AA	AA	AA	AA	AA	AA	AA	AA	AA	AA	AA	GG	AA	AA	AA	AA	AA
14087083|F|0-24:G>T-24:G>T	G/T	VU03	132286	+	NA	NA	NA	NA	NA	NA	GG	GG	GG	GG	GG	TT	GG	GG	GG	GG	GG	GG	GG	GG	GG	GG	GG	GG	GG	GG	GG	GG	GG	NN	GG	GG	GG	GG	GG	GG	GG	GG	GG	TT	GG	GG	GG	GG	GG
14082348|F|0-30:A>T-30:A>T	A/T	VU03	216674	+	NA	NA	NA	NA	NA	NA	AA	AA	AA	AA	AA	TT	AA	AA	AA	AA	AA	AA	AA	AA	AA	AA	AA	AA	AA	AA	AA	AA	AA	AA	AA	AA	AA	AA	AA	AA	AA	AA	AA	TT	AA	AA	AA	AA	AA
42215532|F|0-36:T>C-36:T>C	T/C	VU03	218111	+	NA	NA	NA	NA	NA	NA	TT	TT	TT	TT	TT	CC	TT	NN	TT	TT	TT	NN	NN	TT	TT	TT	TT	NN	TT	TT	TT	NN	TT	NN	TT	NN	TT	TT	NN	TT	TT	TT	NN	CC	TT	NN	TT	TT	NN
25364272|F|0-14:A>G-14:A>G	A	VU03	251209	+	NA	NA	NA	NA	NA	NA	AA	AA	AA	AA	AA	AA	AA	AA	AA	AA	AA	AA	AA	AA	AA	AA	AA	AA	AA	AA	AA	AA	AA	AA	AA	AA	AA	AA	AA	AA	AA	AA	AA	AA	AA	AA	AA	AA	AA
14057361|F|0-55:T>A-55:T>A	T	VU03	253835	+	NA	NA	NA	NA	NA	NA	TT	TT	TT	TT	TT	TT	TT	TT	TT	TT	TT	TT	TT	TT	TT	TT	TT	TT	TT	TT	TT	TT	TT	TT	TT	TT	TT	TT	TT	TT	TT	TT	TT	TT	TT	TT	TT	TT	TT
42215775|F|0-61:A>C-61:A>C	A/C	VU03	275779	+	NA	NA	NA	NA	NA	NA	AA	AA	AA	AA	AA	NN	AA	AA	AA	AA	AA	AA	AA	AA	AA	AA	AA	AA	AA	AA	AA	AA	AA	AA	AA	AA	AA	AA	AA	AA	AA	AA	AA	NN	NN	NN	AA	AA	AA
42215775|F|0-7:A>G-7:A>G	A/G	VU03	275779	+	NA	NA	NA	NA	NA	NA	AA	AA	AA	AA	AA	GG	AA	AA	AA	AA	AA	AA	AA	AA	AA	AA	AA	AA	AA	AA	AA	AA	AA	AA	AA	AA	AA	AA	AA	AA	AA	AA	AA	GG	NN	NN	AA	AA	AA
35154357|F|0-13:G>A-13:G>A	G/A	VU03	287150	+	NA	NA	NA	NA	NA	NA	GG	GG	GG	GG	AG	AA	GG	GG	GG	GG	GG	GG	GG	GG	GG	GG	GG	GG	GG	GG	GG	GG	GG	GG	GG	GG	GG	GG	GG	GG	GG	GG	GG	AA	GG	GG	GG	GG	GG
35154357|F|0-35:G>A-35:G>A	G/A	VU03	287150	+	NA	NA	NA	NA	NA	NA	GG	GG	GG	GG	GG	NN	GG	GG	GG	GG	GG	GG	GG	GG	GG	GG	GG	GG	GG	GG	GG	GG	GG	GG	GG	GG	GG	GG	GG	GG	GG	GG	GG	NN	GG	GG	GG	GG	GG
42215495|F|0-13:A>T-13:A>T	A/T	VU03	287191	+	NA	NA	NA	NA	NA	NA	AA	AA	AA	AA	AA	TT	AA	AA	AA	AA	AA	AA	AA	AA	AA	AA	AA	AA	AA	AA	AA	AA	AA	AA	AA	AA	AA	AA	AA	AA	AA	AA	AA	TT	AA	AA	AA	AA	AA
42215355|F|0-64:A>G-64:A>G	A/G	VU03	292540	+	NA	NA	NA	NA	NA	NA	AA	AA	AA	AA	AA	AA	AA	AA	AA	AA	AA	AA	AA	AA	AA	AA	AA	AA	AA	AA	AA	AA	AA	AA	AA	AA	AA	AA	AA	AA	AA	AA	AA	AA	AA	AA	AA	NN	AA
14059586|F|0-8:G>T-8:G>T	G	VU03	292606	+	NA	NA	NA	NA	NA	NA	GG	GG	GG	GG	GG	GG	GG	GG	GG	GG	GG	GG	GG	GG	GG	GG	GG	GG	GG	GG	GG	GG	GG	GG	GG	GG	GG	GG	GG	GG	GG	GG	GG	GG	GG	GG	GG	GG	GG
25355606|F|0-18:T>C-18:T>C	T	VU03	307551	+	NA	NA	NA	NA	NA	NA	TT	TT	TT	TT	TT	TT	TT	TT	TT	TT	TT	TT	TT	TT	TT	TT	TT	TT	TT	TT	TT	TT	TT	TT	NN	TT	TT	TT	TT	TT	TT	TT	TT	TT	TT	TT	TT	TT	TT
35153534|F|0-24:C>T-24:C>T	T/C	VU03	307551	+	NA	NA	NA	NA	NA	NA	TT	TT	TT	TT	TT	TT	TT	TT	TT	TT	TT	TT	TT	TT	TT	TT	TT	TT	TT	TT	TT	CT	TT	TT	CC	TT	TT	TT	TT	TT	TT	TT	TT	TT	TT	TT	TT	TT	TT
35153057|F|0-11:G>A-11:G>A	G	VU03	307617	+	NA	NA	NA	NA	NA	NA	GG	GG	GG	GG	GG	GG	GG	GG	GG	GG	GG	GG	GG	GG	GG	GG	GG	GG	GG	GG	GG	GG	GG	GG	NN	GG	NN	GG	GG	GG	GG	GG	NN	GG	GG	GG	GG	GG	GG
35153057|F|0-49:C>T-49:C>T	T/C	VU03	307617	+	NA	NA	NA	NA	NA	NA	TT	TT	TT	TT	TT	CT	TT	TT	TT	TT	TT	TT	TT	TT	TT	TT	TT	TT	TT	TT	TT	TT	TT	TT	CC	TT	NN	TT	TT	TT	TT	TT	NN	TT	TT	TT	TT	TT	TT
14088011|F|0-24:A>G-24:A>G	A/G	VU03	327116	+	NA	NA	NA	NA	NA	NA	AA	AA	AA	GG	AA	NN	AA	AA	AA	GG	AA	AA	AA	GG	AA	AA	AA	AA	GG	GG	GG	AG	AA	AA	AA	AA	AA	GG	GG	GG	AA	AA	AA	NN	AA	AA	AA	AA	AA
42215467|F|0-6:C>T-6:C>T	C/T	VU03	330511	+	NA	NA	NA	NA	NA	NA	CC	CC	CC	CC	CC	TT	CC	CC	CC	CC	CC	CC	CC	CC	CC	CC	CC	CC	CC	CC	NN	CC	CC	CC	CC	CC	NN	CC	CC	NN	CC	NN	CC	NN	CC	CC	CC	CC	CC
100045951|F|0-11:G>A-11:G>A	G/A	VU03	330880	+	NA	NA	NA	NA	NA	NA	GG	GG	GG	GG	GG	GG	GG	GG	GG	NN	GG	GG	GG	GG	GG	GG	GG	GG	GG	GG	GG	GG	GG	GG	GG	GG	GG	GG	GG	GG	GG	AA	GG	GG	GG	NN	GG	GG	GG
100045951|F|0-66:T>C-66:T>C	T/C	VU03	330880	+	NA	NA	NA	NA	NA	NA	TT	TT	TT	TT	TT	TT	TT	TT	TT	CC	TT	TT	TT	TT	TT	TT	TT	TT	TT	TT	TT	TT	TT	TT	TT	TT	TT	TT	TT	TT	TT	NN	TT	TT	TT	NN	TT	TT	TT
35154756|F|0-7:C>T-7:C>T	C/T	VU03	331738	+	NA	NA	NA	NA	NA	NA	CC	CC	CC	CC	NN	TT	CC	CC	CC	CC	CC	CC	CC	CC	CC	CC	CC	CC	CC	CC	CC	CC	NN	CC	TT	CC	CC	CC	NN	CC	CC	CC	NN	TT	CC	NN	CC	NN	CC
14080127|F|0-38:G>T-38:G>T	G/T	VU03	331804	+	NA	NA	NA	NA	NA	NA	GG	GG	GG	GG	GG	GG	GG	GG	GG	GG	GG	GG	GG	GG	GG	GG	GG	GG	GG	GG	GG	GT	GG	GG	GG	GG	GG	GG	GG	GG	GG	GG	GG	GG	GG	GG	GG	GG	GG
25365904|F|0-65:C>T-65:C>T	C/T	VU03	345768	+	NA	NA	NA	NA	NA	NA	CC	CC	CC	CC	CC	TT	CC	CC	CC	CC	CC	CC	CC	CC	CC	CC	CC	CC	CC	CC	CC	CC	CC	CC	CC	CC	CC	CC	CC	CC	CC	CC	CC	TT	CC	CC	CC	CC	CC
25354934|F|0-55:C>A-55:C>A	C/A	VU03	370445	+	NA	NA	NA	NA	NA	NA	CC	CC	CC	CC	CC	AA	CC	CC	CC	CC	CC	CC	CC	CC	CC	CC	CC	CC	CC	CC	CC	CC	CC	CC	CC	CC	CC	CC	CC	CC	CC	CC	CC	CC	CC	CC	CC	CC	CC
100012002|F|0-26:A>G-26:A>G	A/G	VU03	398150	+	NA	NA	NA	NA	NA	NA	AA	AA	AA	AA	AA	AA	AA	AA	AA	AA	AA	AA	AA	AA	AA	AA	AA	AA	AA	AA	AA	AA	GG	AA	AA	AA	AA	AA	AA	AA	AA	AA	AA	AA	AA	AA	AA	AA	AA
14082341|F|0-40:T>C-40:T>C	C/T	VU03	399089	+	NA	NA	NA	NA	NA	NA	TT	TT	TT	TT	CC	TT	TT	CC	TT	CC	TT	CC	CC	CC	CC	CC	CC	TT	CC	TT	CC	CC	CC	CC	CC	TT	TT	CC	TT	TT	TT	TT	CT	TT	TT	CC	TT	TT	TT
35153765|F|0-37:A>G-37:A>G	A	VU03	417912	+	NA	NA	NA	NA	NA	NA	AA	AA	AA	AA	AA	AA	AA	AA	AA	AA	AA	AA	NN	AA	AA	AA	AA	AA	AA	NN	AA	AA	AA	AA	AA	AA	AA	AA	AA	AA	AA	AA	AA	AA	AA	AA	AA	AA	AA
35152645|F|0-61:T>G-61:T>G	G/T	VU03	424513	+	NA	NA	NA	NA	NA	NA	TT	GG	TT	TT	GG	TT	TT	GG	TT	GG	TT	GG	GG	GG	GG	GG	GG	TT	GG	TT	GG	GG	TT	GG	GG	TT	TT	GG	TT	GT	TT	TT	GG	TT	TT	GG	TT	NN	TT
14074729|F|0-48:G>A-48:G>A	A/G	VU03	464380	+	NA	NA	NA	NA	NA	NA	AA	GG	AA	AA	GG	AA	AA	GG	AA	AA	AA	AA	GG	AA	GG	GG	GG	GG	AA	AA	AA	AA	AA	GG	GG	AA	AG	AA	GG	AA	GG	AA	AA	AA	AA	GG	AA	AA	AA
14055372|F|0-57:C>T-57:C>T	C/T	VU03	472200	+	NA	NA	NA	NA	NA	NA	CC	CC	CC	CC	CC	CC	CC	CC	CC	CC	CC	CC	CC	CC	CC	CC	CT	CC	CC	CC	CC	CC	CC	CT	CC	CC	CC	CC	CC	CC	CC	CT	CC	CC	CC	CC	CC	CC	CC
25365715|F|0-45:T>G-45:T>G	G	VU03	521386	+	NA	NA	NA	NA	NA	NA	GG	NN	GG	GG	GG	GG	GG	GG	GG	GG	NN	GG	GG	GG	GG	GG	GG	NN	GG	GG	NN	GG	GG	GG	GG	GG	GG	GG	GG	NN	GG	NN	GG	GG	GG	NN	GG	GG	NN
14073451|F|0-16:G>T-16:G>T	G/T	VU03	521448	+	NA	NA	NA	NA	NA	NA	GG	GG	GG	GG	GG	TT	GG	GG	GG	GG	GG	GG	TT	GG	GG	TT	GG	GG	GG	TT	GG	GT	GG	GT	TT	TT	GG	GG	GG	GG	GG	GG	GG	GG	GG	GG	GG	GG	GG
14055683|F|0-16:T>C-16:T>C	T/C	VU03	557347	+	NA	NA	NA	NA	NA	NA	TT	CC	TT	TT	TT	TT	TT	TT	TT	TT	TT	TT	TT	TT	TT	TT	TT	TT	TT	TT	TT	TT	TT	TT	TT	TT	TT	TT	TT	TT	TT	TT	TT	TT	TT	CC	TT	TT	TT
14076389|F|0-41:T>C-41:T>C	T/C	VU03	567364	+	NA	NA	NA	NA	NA	NA	TT	TT	TT	TT	TT	CC	TT	CT	TT	TT	CC	TT	TT	TT	TT	TT	TT	TT	TT	TT	TT	TT	TT	CT	CC	CC	CT	TT	TT	CT	TT	TT	TT	TT	TT	TT	TT	TT	TT
14077314|F|0-62:G>A-62:G>A	G/A	VU03	625862	+	NA	NA	NA	NA	NA	NA	GG	GG	GG	GG	GG	GG	GG	GG	AA	AG	GG	GG	GG	GG	GG	GG	GG	AA	GG	GG	GG	NN	GG	GG	GG	GG	AG	GG	GG	GG	AA	GG	NN	GG	GG	GG	GG	GG	GG
14075863|F|0-68:T>A-68:T>A	T/A	VU03	625928	+	NA	NA	NA	NA	NA	NA	TT	TT	TT	TT	TT	TT	TT	TT	AA	TT	TT	TT	TT	TT	TT	TT	TT	AA	TT	TT	TT	TT	TT	TT	TT	TT	TT	TT	TT	TT	AA	TT	TT	TT	TT	TT	TT	TT	TT
14077034|F|0-60:T>C-60:T>C	T/C	VU03	642338	+	NA	NA	NA	NA	NA	NA	TT	TT	TT	TT	TT	TT	TT	TT	CC	TT	TT	TT	TT	TT	TT	TT	TT	CC	TT	TT	TT	TT	TT	TT	TT	TT	CT	TT	TT	TT	CC	TT	TT	TT	TT	TT	TT	TT	TT
14082665|F|0-9:A>G-9:A>G	A/G	VU03	642404	+	NA	NA	NA	NA	NA	NA	AA	NN	NN	AA	NN	AA	AA	AA	GG	AA	AA	AA	AA	AA	AA	AA	AA	GG	AA	AA	AA	AA	AA	AA	AA	AA	AG	AA	AA	AA	GG	AA	AA	AA	AA	NN	NN	AA	AA
14075480|F|0-65:T>C-65:T>C	T/C	VU03	673125	+	NA	NA	NA	NA	NA	NA	TT	CC	CC	TT	CC	TT	TT	CC	TT	TT	TT	TT	TT	TT	TT	TT	TT	TT	TT	TT	TT	TT	TT	TT	TT	TT	TT	TT	TT	TT	TT	TT	TT	TT	TT	CC	CC	TT	TT
35154682|F|0-32:C>T-32:C>T	T/C	VU03	674465	+	NA	NA	NA	NA	NA	NA	TT	NN	NN	TT	NN	TT	TT	NN	NN	TT	TT	TT	TT	NN	TT	TT	TT	NN	TT	TT	TT	TT	TT	TT	TT	TT	TT	TT	TT	TT	CC	TT	NN	CC	CC	NN	NN	CC	CC
14087987|F|0-19:A>C-19:A>C	C/A	VU03	680781	+	NA	NA	NA	NA	NA	NA	CC	AA	AA	CC	AA	AC	CC	AA	AA	CC	CC	CC	CC	CC	CC	CC	CC	AA	CC	CC	CC	CC	CC	CC	CC	CC	AC	CC	CC	CC	AA	CC	CC	AA	AA	NN	AA	AA	AA
35152987|F|0-68:T>C-68:T>C	T/C	VU03	685499	+	NA	NA	NA	NA	NA	NA	CC	CC	CC	NN	CC	TT	TT	CC	CC	TT	NN	CC	CC	TT	CC	CC	TT	CC	TT	CC	CC	NN	CC	NN	TT	TT	CC	TT	CC	TT	NN	TT	CC	NN	TT	CC	NN	TT	CC
25355835|F|0-14:C>G-14:C>G	C/G	VU03	689150	+	NA	NA	NA	NA	NA	NA	CC	CC	GC	CC	GC	CC	CC	GC	NN	CC	CC	CC	CC	CC	CC	CC	CC	NN	CC	CC	CC	CC	CC	CC	CC	CC	CC	CC	CC	CC	GG	CC	CC	GG	GG	CC	GC	GG	GG
14087986|F|0-16:C>T-16:C>T	T/C	VU03	697203	+	NA	NA	NA	NA	NA	NA	CC	NN	CC	TT	CC	NN	TT	CC	NN	TT	TT	TT	CC	TT	TT	CC	CC	NN	TT	CC	TT	CT	TT	TT	TT	CC	CC	TT	TT	NN	CC	NN	TT	CC	CC	TT	CC	CC	CC
14087986|F|0-43:C>G-43:C>G	C/G	VU03	697203	+	NA	NA	NA	NA	NA	NA	GG	CC	GC	CC	GC	CC	CC	GC	CC	CC	CC	CC	GG	CC	CC	GG	GC	CC	CC	GG	CC	GC	CC	CC	CC	GG	GC	CC	CC	CC	GC	CC	CC	GG	GG	NN	GC	GG	GG
14087987|F|0-20:G>A-20:G>A	A/G	VU03	697203	+	NA	NA	NA	NA	NA	NA	GG	GG	GG	AA	GG	NN	AA	GG	NN	AA	AA	AA	GG	AA	AA	GG	GG	NN	AA	GG	AA	AA	AA	AA	AA	GG	NN	AA	AA	GG	NN	GG	AA	NN	NN	AG	GG	NN	NN
35153412|F|0-26:T>C-26:T>C	C/T	VU03	703352	+	NA	NA	NA	NA	NA	NA	CC	CC	CC	TT	CC	CC	TT	CC	CC	TT	NN	TT	CC	TT	TT	CC	CT	CC	TT	CC	TT	TT	NN	NN	TT	CC	CC	TT	TT	CC	CC	CC	TT	CC	NN	NN	CC	CC	CC
35153992|F|0-29:T>G-29:T>G	G/T	VU03	743956	+	NA	NA	NA	NA	NA	NA	GG	GG	GG	GG	NN	GG	GG	GG	NN	GG	GG	GG	TT	GG	GG	TT	GG	GG	GG	TT	GG	GG	GG	GG	GG	GG	NN	GG	GG	GG	NN	GG	NN	GG	GG	NN	GG	NN	NN
14082515|F|0-57:C>T-57:C>T	C/T	VU03	747270	+	NA	NA	NA	NA	NA	NA	CC	CC	CC	CC	CC	CC	CC	CC	CC	CC	TT	CC	CC	CC	CC	CC	CT	CC	CC	CC	CC	CC	CC	CT	CC	CC	CT	CC	CC	CC	CC	CC	CC	CC	CC	CC	CC	TT	CC
35153970|F|0-33:G>A-33:G>A	A/G	VU03	769781	+	NA	NA	NA	NA	NA	NA	GG	GG	AA	AA	GG	AA	AA	NN	GG	AA	GG	AA	GG	AA	AA	GG	AG	AA	NN	GG	AA	AA	NN	GG	GG	GG	NN	AA	AA	AA	AA	NN	AA	GG	AA	NN	NN	NN	AA
35153649|F|0-18:C>A-18:C>A	A/C	VU03	802877	+	NA	NA	NA	NA	NA	NA	CC	CC	AA	AA	NN	AC	NN	CC	CC	AA	CC	NN	AA	AA	NN	AA	AC	AA	AA	AA	AA	NN	CC	CC	NN	CC	AA	NN	NN	NN	AA	AA	AA	NN	AA	CC	AA	NN	AA
35152789|F|0-67:T>G-67:T>G	G/T	VU03	802943	+	NA	NA	NA	NA	NA	NA	GG	GG	GG	GG	GG	GG	GG	GG	GG	GG	GG	GG	GG	GG	GG	GG	GG	GG	NN	TT	GG	GG	NN	GG	GG	GG	NN	GG	GG	GG	GG	GG	GG	GG	GG	NN	GG	NN	GG
35153531|F|0-19:C>G-19:C>G	G/C	VU03	829879	+	NA	NA	NA	NA	NA	NA	GG	GG	GG	GG	GG	GG	GG	GG	NN	GG	GG	GG	GG	GG	GG	GG	GG	GG	GG	NN	GG	NN	GG	GG	GG	GG	NN	NN	GG	NN	GG	GG	GG	GG	GG	NN	GG	NN	GG
14079846|F|0-6:G>A-6:G>A	A/G	VU03	901789	+	NA	NA	NA	NA	NA	NA	GG	GG	GG	AA	GG	GG	AA	GG	GG	AA	GG	AA	AA	AA	AA	AA	AG	GG	AA	AA	AA	AA	AA	GG	GG	AA	GG	AA	AA	AA	GG	AA	AA	GG	GG	GG	AA	GG	GG
100011233|F|0-31:A>G-31:A>G	A/G	VU03	1007210	+	NA	NA	NA	NA	NA	NA	AA	AA	AA	AA	AA	AA	AA	AA	AA	AA	AA	AA	AA	AA	AA	AA	AG	AA	AA	AA	AA	NN	AA	AA	AA	AA	AA	AA	AA	AA	AA	AA	AA	AA	AA	AA	AA	NN	AA
35154476|F|0-34:T>C-34:T>C	C/T	VU03	1032741	+	NA	NA	NA	NA	NA	NA	NN	CC	TT	CC	CC	CC	CC	CC	CC	CC	TT	CC	CC	CC	CC	CC	CC	TT	CC	NN	CC	CT	CC	CC	CC	CC	CC	CC	CC	CC	TT	CC	CC	CC	CC	NN	TT	CC	CC
14074600|F|0-49:T>C-49:T>C	T/C	VU03	1061775	+	NA	NA	NA	NA	NA	NA	TT	TT	TT	TT	TT	TT	TT	TT	CC	TT	TT	TT	TT	TT	TT	TT	TT	TT	TT	TT	TT	TT	TT	CT	CC	TT	TT	TT	TT	TT	CC	TT	TT	TT	TT	TT	TT	TT	TT
14076819|F|0-8:C>T-8:C>T	C/T	VU03	1068041	+	NA	NA	NA	NA	NA	NA	TT	TT	CC	TT	CC	CC	TT	CC	CC	CC	CC	TT	CC	CC	TT	CC	TT	CC	CC	TT	CC	CC	CC	CC	CC	TT	CC	CC	TT	TT	CC	TT	TT	CC	CC	TT	CC	CC	CC
28497765|F|0-5:T>C-5:T>C	C/T	VU03	1069850	+	NA	NA	NA	NA	NA	NA	CC	CC	CC	CC	CC	CC	CC	CC	CC	TT	CC	CC	TT	TT	CC	TT	CC	CC	CT	CC	TT	CT	CC	CC	CC	CC	CC	TT	CC	CC	CC	CC	CC	CC	CC	CC	CC	CC	CC
14077131|F|0-57:C>T-57:C>T	C/T	VU03	1072861	+	NA	NA	NA	NA	NA	NA	CC	CC	CC	CC	CC	CC	CC	CC	TT	CC	CC	CC	CC	CC	CC	CC	CC	CC	CC	CC	CC	CC	CC	CT	TT	CC	CC	CC	CC	CC	CC	CC	CC	CC	CC	CC	CC	CC	CC
14073733|F|0-16:G>A-16:G>A	G/A	VU03	1081086	+	NA	NA	NA	NA	NA	NA	GG	GG	GG	GG	GG	GG	GG	GG	AA	GG	GG	GG	GG	GG	GG	GG	GG	GG	GG	GG	GG	GG	GG	AG	AA	GG	GG	GG	GG	GG	GG	GG	GG	GG	GG	GG	GG	GG	GG
14085596|F|0-23:A>G-23:A>G	A/G	VU03	1092128	+	NA	NA	NA	NA	NA	NA	AA	AA	AA	AA	AA	AA	AA	AA	GG	AA	AA	AA	AA	AA	AA	AA	AA	AA	AA	AA	AA	AA	AA	AG	GG	AA	AA	AA	AA	AA	AA	AA	AA	AA	AA	AA	AA	AA	AA
14075844|F|0-57:A>G-57:A>G	A/G	VU03	1095302	+	NA	NA	NA	NA	NA	NA	AA	AA	AA	AA	AA	AA	AA	AA	NN	AA	AA	AA	AA	AA	AA	AA	GG	AA	AG	AA	AA	AA	AA	AA	NN	AA	AA	AA	AA	AA	AA	AA	AA	AA	AA	AA	AA	AA	AA
14075000|F|0-28:A>C-28:A>C	A/C	VU03	1095368	+	NA	NA	NA	NA	NA	NA	AA	AA	AA	AA	AA	AA	AA	AA	AC	AA	AA	AA	AA	AA	AA	AA	AA	AA	AA	AA	AA	AA	AA	AC	CC	AA	AA	AA	AA	AA	AA	AA	AA	AA	AA	AA	AA	AA	AA
14077429|F|0-36:A>G-36:A>G	A/G	VU03	1118010	+	NA	NA	NA	NA	NA	NA	AA	AA	AA	AA	AA	GG	AA	AA	GG	AA	AA	AA	AA	AA	AA	AA	AA	AA	AA	AA	AA	AA	AA	AG	GG	AA	AA	AA	AA	AA	AA	AA	AA	AA	AA	AA	AA	AA	AA
14076801|F|0-8:G>A-8:G>A	G/A	VU03	1124916	+	NA	NA	NA	NA	NA	NA	GG	AA	GG	GG	GG	GG	GG	GG	GG	GG	AA	GG	GG	GG	GG	GG	GG	AA	GG	GG	GG	GG	GG	GG	GG	GG	AG	GG	GG	GG	GG	GG	GG	GG	AA	GG	GG	GG	AA
35153867|F|0-38:T>C-38:T>C	T/C	VU03	1140875	+	NA	NA	NA	NA	NA	NA	TT	TT	TT	TT	TT	TT	TT	TT	TT	TT	TT	TT	TT	TT	TT	TT	TT	TT	TT	TT	TT	NN	TT	TT	TT	TT	TT	TT	NN	TT	TT	TT	TT	TT	TT	TT	TT	TT	TT
14074072|F|0-7:A>G-7:A>G	A/G	VU03	1140941	+	NA	NA	NA	NA	NA	NA	AA	GG	AA	AA	AA	GG	AA	AA	GG	AA	AA	AA	AA	AA	AA	AA	GG	AA	AA	AA	AA	AA	AA	AG	GG	AA	AA	AA	AA	AA	AA	AA	AA	AA	AA	AA	AA	NN	AA
14082096|F|0-45:C>A-45:C>A	A/C	VU03	1153306	+	NA	NA	NA	NA	NA	NA	CC	CC	CC	AA	CC	CC	AA	CC	CC	AA	AA	AA	AA	AA	AA	AA	CC	AA	AA	AA	AA	AA	CC	CC	CC	CC	AC	AA	AA	AA	CC	AA	AA	CC	AA	CC	CC	CC	AA
14081861|F|0-54:C>A-54:C>A	A/C	VU03	1158690	+	NA	NA	NA	NA	NA	NA	CC	NN	CC	AA	CC	CC	AA	CC	CC	AA	AA	AA	AA	AA	AA	AA	CC	AA	AA	AA	AA	AA	CC	CC	CC	NN	AC	AA	AA	AA	CC	AA	AA	CC	AA	NN	CC	CC	AA
14076048|F|0-42:T>C-42:T>C	T/C	VU03	1224325	+	NA	NA	NA	NA	NA	NA	TT	TT	TT	TT	TT	CC	TT	TT	CC	TT	TT	TT	TT	TT	TT	TT	TT	TT	TT	TT	TT	TT	TT	CT	CC	TT	TT	TT	TT	TT	TT	TT	TT	TT	TT	TT	TT	CC	TT
14080269|F|0-10:T>G-10:T>G	T/G	VU03	1229322	+	NA	NA	NA	NA	NA	NA	TT	TT	TT	TT	TT	GG	TT	TT	GG	TT	TT	TT	TT	TT	TT	TT	TT	TT	TT	TT	TT	TT	TT	TT	GG	TT	TT	TT	TT	TT	TT	TT	TT	TT	TT	TT	TT	GG	TT
14077500|F|0-48:T>C-48:T>C	T/C	VU03	1244490	+	NA	NA	NA	NA	NA	NA	TT	TT	TT	TT	TT	TT	TT	TT	TT	TT	TT	TT	TT	TT	TT	TT	TT	TT	TT	TT	TT	TT	TT	TT	TT	TT	TT	TT	TT	TT	TT	TT	TT	TT	TT	TT	CC	TT	TT
14074178|F|0-10:A>C-10:A>C	A/C	VU03	1350586	+	NA	NA	NA	NA	NA	NA	AA	CC	AA	AA	AA	CC	AA	CC	AA	AA	AA	AA	AA	AA	AA	AA	AA	AA	AA	AA	AA	AA	AA	AA	CC	AA	AA	AA	AA	AA	CC	AA	AA	CC	AA	AA	AA	CC	AA
35154018|F|0-63:A>C-63:A>C	C/A	VU03	1421148	+	NA	NA	NA	NA	NA	NA	AA	AA	CC	CC	AA	AA	CC	AA	AC	CC	CC	CC	CC	CC	CC	CC	CC	CC	CC	AC	CC	CC	AA	AA	AA	CC	NN	CC	CC	CC	AA	CC	CC	NN	AA	NN	CC	AA	AA
14076067|F|0-38:C>A-38:C>A	C/A	VU03	1435711	+	NA	NA	NA	NA	NA	NA	AA	CC	CC	CC	AA	AA	CC	CC	CC	CC	CC	CC	CC	CC	CC	CC	CC	CC	CC	AC	CC	CC	AA	AC	AA	CC	AC	CC	CC	CC	CC	CC	CC	AA	AA	AA	CC	AA	AA
14083841|F|0-11:A>G-11:A>G	G/A	VU03	1507072	+	NA	NA	NA	NA	NA	NA	GG	AA	AA	GG	AA	AA	GG	AA	AA	GG	AA	GG	GG	GG	GG	GG	GG	AA	GG	AG	GG	GG	AA	AA	AA	GG	AA	GG	GG	GG	AA	GG	GG	AA	AA	AA	GG	AA	AA
14087525|F|0-44:C>G-44:C>G	G/C	VU03	1548145	+	NA	NA	NA	NA	NA	NA	CC	GG	CC	GG	CC	GG	GG	CC	CC	GG	CC	GG	GG	GG	GG	GG	GG	CC	GG	GC	GG	GG	CC	CC	CC	GG	CC	GG	GG	GG	CC	GG	GG	CC	CC	CC	GG	GG	CC
14073938|F|0-28:C>G-28:C>G	G/C	VU03	1558870	+	NA	NA	NA	NA	NA	NA	CC	GG	CC	GG	CC	GG	GG	CC	GC	GG	CC	GG	GG	GG	GG	GG	GG	CC	GG	GC	GG	GG	CC	CC	CC	GG	CC	GG	GG	GG	CC	GG	GG	CC	CC	NN	GG	GG	CC
14084869|F|0-15:C>T-15:C>T	T/C	VU03	1598893	+	NA	NA	NA	NA	NA	NA	CC	CC	TT	TT	TT	CC	TT	TT	TT	TT	TT	TT	TT	TT	TT	TT	CT	TT	TT	TT	TT	TT	TT	TT	TT	CC	TT	TT	TT	TT	TT	TT	TT	TT	TT	TT	CC	CC	TT
14081707|F|0-21:G>A-21:G>A	A/G	VU03	1599303	+	NA	NA	NA	NA	NA	NA	GG	GG	AA	AA	AA	GG	AA	AA	AA	AA	AA	AA	AA	AA	AA	AA	AG	AA	AG	AA	AA	AA	AA	AA	AA	GG	AA	AA	AA	AA	AA	AA	AA	AA	AA	AA	GG	GG	AA
35152828|F|0-24:C>T-24:C>T	C/T	VU03	1601245	+	NA	NA	NA	NA	NA	NA	CC	CC	CC	CC	CC	CC	CC	CC	CC	CC	CC	CC	CC	CC	TT	CC	CC	CC	CC	CC	CC	CC	CC	CC	CC	CC	CC	CC	CC	CC	CC	NN	CC	CC	CC	NN	CC	NN	CC
14076916|F|0-28:C>T-28:C>T	C/T	VU03	1603979	+	NA	NA	NA	NA	NA	NA	CC	CC	CC	CC	NN	CC	CC	CC	CC	CC	CC	CC	CC	CC	NN	CC	CC	CC	CC	CC	CC	CC	CC	CC	CC	CC	NN	CC	NN	CC	CC	NN	CC	NN	TT	NN	CC	CC	TT
14082903|F|0-35:T>A-35:T>A	A/T	VU03	1640995	+	NA	NA	NA	NA	NA	NA	AA	AA	TT	AA	TT	AA	AA	TT	TT	AA	TT	AA	AA	AA	AA	AA	AA	TT	AA	AT	AA	AA	TT	TT	TT	AA	TT	AA	AA	AA	AA	AA	AA	TT	TT	TT	AA	AA	TT
14074519|F|0-47:A>T-47:A>T	T/A	VU03	1642068	+	NA	NA	NA	NA	NA	NA	AA	AA	AA	TT	AA	AA	TT	AA	AA	TT	AA	TT	TT	TT	AA	TT	TT	AA	TT	AT	TT	TT	AA	AA	AA	AA	AA	TT	TT	TT	AA	TT	TT	AA	AA	AA	AA	AA	AA
25358246|F|0-37:G>A-37:G>A	G/A	VU03	1670589	+	NA	NA	NA	NA	NA	NA	GG	GG	GG	GG	GG	GG	GG	GG	GG	GG	GG	GG	GG	GG	GG	GG	GG	GG	GG	GG	GG	GG	GG	GG	GG	GG	GG	GG	GG	GG	GG	GG	GG	GG	GG	GG	GG	GG	GG
14056437|F|0-36:T>C-36:T>C	T/C	VU03	1690284	+	NA	NA	NA	NA	NA	NA	TT	TT	TT	TT	TT	TT	TT	TT	TT	TT	TT	TT	TT	TT	TT	TT	TT	TT	TT	TT	TT	TT	TT	TT	TT	TT	TT	TT	TT	TT	TT	TT	TT	TT	TT	TT	TT	TT	TT
14087756|F|0-47:G>T-47:G>T	G/T	VU03	1787188	+	NA	NA	NA	NA	NA	NA	GG	GG	GG	TT	GG	GG	TT	GG	GG	TT	GG	GG	TT	TT	TT	TT	GG	GG	TT	GT	GG	GG	GG	GG	GG	GG	GG	TT	TT	GG	GG	GG	TT	GG	GG	GG	GG	GG	GG
100009765|F|0-68:A>C-68:A>C	A/C	VU03	1835214	+	NA	NA	NA	NA	NA	NA	AA	AA	AA	AA	AA	AA	AA	AA	NN	AA	AA	AA	AA	AA	AA	AA	AA	AA	AA	AA	AA	AA	AA	AA	AA	AA	AA	AA	AA	AA	AA	AA	AA	AA	AA	AA	AA	AA	AA
14083120|F|0-30:T>C-30:T>C	T/C	VU03	1855507	+	NA	NA	NA	NA	NA	NA	TT	TT	TT	TT	TT	TT	TT	TT	TT	NN	TT	NN	NN	NN	TT	NN	TT	TT	NN	TT	TT	TT	TT	TT	TT	TT	TT	NN	NN	CC	TT	NN	TT	TT	TT	TT	TT	TT	TT
14083120|F|0-42:C>A-42:C>A	C/A	VU03	1855507	+	NA	NA	NA	NA	NA	NA	CC	CC	CC	CC	CC	CC	CC	CC	CC	AA	CC	AA	AA	AA	CC	AA	CC	CC	AA	CC	CC	CC	CC	CC	CC	CC	CC	AA	AA	AA	CC	AA	CC	CC	CC	CC	CC	CC	CC
35154145|F|0-10:G>A-10:G>A	G/A	VU03	1923638	+	NA	NA	NA	NA	NA	NA	GG	GG	GG	GG	GG	GG	GG	NN	GG	NN	GG	GG	AA	AA	GG	AA	GG	NN	AA	GG	GG	NN	GG	NN	GG	NN	NN	AA	NN	NN	GG	NN	GG	NN	GG	NN	GG	GG	NN
14076202|F|0-30:A>G-30:A>G	G/A	VU03	1976677	+	NA	NA	NA	NA	NA	NA	GG	AA	AA	GG	AA	GG	GG	GG	AA	AA	GG	GG	AA	AA	GG	GG	GG	AA	AA	AG	AA	GG	AA	AA	AA	AA	AA	AA	GG	GG	AA	GG	GG	GG	GG	AA	GG	AA	GG
35154477|F|0-68:G>A-68:G>A	G/A	VU03	1993882	+	NA	NA	NA	NA	NA	NA	GG	GG	GG	GG	GG	GG	GG	GG	GG	GG	GG	GG	GG	GG	GG	GG	GG	GG	GG	GG	GG	GG	GG	GG	GG	GG	GG	GG	GG	GG	GG	GG	GG	GG	GG	GG	GG	GG	GG
100045639|F|0-40:C>T-40:C>T	C/T	VU03	2068579	+	NA	NA	NA	NA	NA	NA	CC	CC	CC	CC	CC	CC	CC	NN	CC	CC	CC	CC	CC	CC	CC	CC	CC	CC	CC	CC	CC	CC	CC	CC	CC	CC	CC	CC	CC	CC	CC	CC	CC	CC	CC	NN	CC	CC	CC
35153098|F|0-9:G>C-9:G>C	C/G	VU03	2082236	+	NA	NA	NA	NA	NA	NA	CC	CC	CC	CC	CC	CC	CC	CC	CC	CC	NN	CC	GG	CC	CC	GG	CC	CC	CC	NN	CC	NN	CC	CC	CC	CC	NN	CC	CC	CC	NN	NN	CC	CC	CC	CC	NN	CC	NN
28202944|F|0-39:G>T-39:G>T	T/G	VU03	2104525	+	NA	NA	NA	NA	NA	NA	TT	TT	TT	GG	TT	GG	GG	GG	TT	GG	NN	GG	TT	GG	GG	GG	GG	TT	GG	TT	TT	TT	NN	TT	GG	TT	GT	GG	NN	TT	TT	TT	GG	TT	TT	TT	GG	GG	TT
100046323|F|0-53:C>A-53:C>A	C/A	VU03	2145489	+	NA	NA	NA	NA	NA	NA	CC	CC	CC	CC	CC	CC	CC	NN	CC	CC	CC	CC	CC	CC	CC	CC	CC	CC	CC	CC	CC	CC	NN	NN	CC	CC	AA	CC	CC	CC	CC	CC	NN	CC	CC	NN	CC	CC	CC
42215362|F|0-38:A>G-38:A>G	A/G	VU03	2272606	+	NA	NA	NA	NA	NA	NA	AA	AA	AA	AA	AA	AA	AA	GG	AA	AA	AA	AA	AA	AA	AA	AA	AA	AA	AA	AA	AA	NN	AA	AA	AA	AA	AA	AA	AA	AA	AA	AA	AA	AA	AA	AA	AA	AA	AA
42215360|F|0-22:G>A-22:G>A	G/A	VU03	2306362	+	NA	NA	NA	NA	NA	NA	GG	GG	GG	GG	GG	GG	GG	GG	GG	GG	GG	GG	GG	GG	GG	GG	GG	GG	GG	GG	GG	GG	GG	GG	GG	AA	AG	GG	GG	GG	GG	GG	GG	GG	GG	GG	GG	GG	GG
25356805|F|0-34:C>T-34:C>T	C/T	VU03	2343249	+	NA	NA	NA	NA	NA	NA	CC	CC	CC	CC	CC	CC	CC	CC	CC	CC	CC	CC	CC	CC	CC	CC	CC	CC	CC	CC	CC	CC	CC	CC	CC	TT	CT	CC	CC	CC	CC	CC	CC	CC	CC	CC	CC	CC	CC
35152837|F|0-12:T>C-12:T>C	C/T	VU03	2442964	+	NA	NA	NA	NA	NA	NA	TT	NN	TT	CC	TT	TT	CC	NN	TT	CC	CT	CC	CC	CC	CC	CC	CT	TT	CC	NN	TT	NN	TT	TT	TT	CC	TT	CC	CC	CC	TT	CC	CC	TT	TT	TT	TT	TT	TT
100032194|F|0-21:G>A-21:G>A	A/G	VU03	2489469	+	NA	NA	NA	NA	NA	NA	AA	AA	AA	AA	AA	AA	AA	AA	AA	AA	AA	AA	AA	AA	AA	AA	AA	AA	AA	AA	AA	AA	GG	AA	GG	AA	AG	AA	AA	AA	AA	AA	AA	AA	AA	NN	AA	AA	AA
14076998|F|0-15:A>G-15:A>G	G/A	VU03	2546676	+	NA	NA	NA	NA	NA	NA	AA	AA	AA	GG	AA	GG	GG	GG	AG	GG	GG	GG	GG	GG	GG	GG	AG	AA	GG	GG	AA	NN	AA	AG	AA	GG	AG	GG	GG	GG	GG	GG	GG	AA	AA	GG	AA	AA	AA
14082913|F|0-14:T>C-14:T>C	T/C	VU03	2611945	+	NA	NA	NA	NA	NA	NA	TT	TT	TT	TT	CC	CC	TT	TT	TT	CC	CC	TT	TT	CC	TT	TT	CT	TT	CC	CC	TT	CC	TT	TT	TT	CC	TT	CC	TT	TT	CT	TT	TT	TT	TT	TT	CC	TT	TT
28497941|F|0-19:A>G-19:A>G	G/A	VU03	2649523	+	NA	NA	NA	NA	NA	NA	GG	GG	GG	NN	GG	GG	NN	GG	GG	AA	AA	NN	NN	AA	GG	NN	GG	GG	AA	AA	GG	AA	GG	GG	GG	GG	GG	AA	AA	NN	GG	NN	NN	GG	GG	GG	GG	GG	GG
14074434|F|0-44:T>C-44:T>C	T/C	VU03	2706551	+	NA	NA	NA	NA	NA	NA	TT	TT	TT	TT	TT	TT	TT	TT	CC	TT	TT	TT	TT	TT	TT	TT	TT	TT	TT	TT	TT	TT	TT	TT	TT	TT	TT	TT	TT	TT	CC	TT	TT	TT	TT	TT	TT	TT	TT
14079058|F|0-8:C>A-8:C>A	A/C	VU03	2708579	+	NA	NA	NA	NA	NA	NA	AA	AA	AA	AA	AA	AA	AA	AA	CC	AA	AA	AA	AA	AA	AA	AA	AA	AA	AA	AA	AA	AA	AA	AA	AA	AA	AA	AA	AA	AA	AC	AA	AA	AA	AA	AA	AA	AA	AA
100009929|F|0-43:T>G-43:T>G	T/G	VU03	2805146	+	NA	NA	NA	NA	NA	NA	TT	TT	TT	TT	TT	TT	TT	TT	TT	TT	TT	TT	TT	TT	TT	TT	TT	TT	TT	TT	TT	TT	TT	TT	TT	TT	TT	TT	TT	GG	TT	GG	TT	TT	TT	TT	TT	TT	TT
14077639|F|0-28:T>A-28:T>A	A/T	VU03	3001811	+	NA	NA	NA	NA	NA	NA	AA	AA	AA	TT	TT	AA	TT	AA	AA	AA	AA	AT	AA	AA	TT	AA	AT	AA	AA	AA	AA	AA	AA	AA	AA	AA	AA	AA	AA	AA	AA	AA	TT	AA	AA	AA	AA	AA	AA
14077256|F|0-18:A>T-18:A>T	A/T	VU03	3026153	+	NA	NA	NA	NA	NA	NA	AA	AA	AA	TT	TT	AA	TT	AA	AA	AA	AA	TT	AA	AA	TT	AA	AA	AA	AA	AA	AA	AA	AA	AA	AA	AA	AA	AA	TT	TT	AA	TT	TT	AA	AA	AA	AA	AA	AA
25353587|F|0-6:C>G-6:C>G	C/G	VU03	3138148	+	NA	NA	NA	NA	NA	NA	CC	CC	CC	CC	CC	CC	CC	CC	CC	CC	CC	CC	CC	CC	CC	CC	GC	CC	CC	CC	CC	CC	CC	CC	CC	CC	CC	CC	CC	CC	CC	CC	CC	CC	CC	CC	CC	GG	CC
14074314|F|0-27:G>C-27:G>C	C/G	VU03	3265598	+	NA	NA	NA	NA	NA	NA	GG	GG	CC	CC	GG	CC	CC	GG	GG	CC	CC	CC	CC	CC	GG	CC	GC	GG	CC	CC	GG	CC	GG	GG	GG	GG	GG	CC	CC	CC	GG	CC	CC	GG	GG	GG	CC	GG	GG
100009219|F|0-35:G>A-35:G>A	G/A	VU03	3285426	+	NA	NA	NA	NA	NA	NA	GG	GG	GG	GG	GG	GG	GG	GG	GG	GG	GG	GG	GG	GG	GG	GG	GG	GG	GG	GG	GG	GG	GG	GG	GG	GG	GG	GG	GG	GG	GG	GG	GG	GG	GG	GG	GG	GG	GG
14073324|F|0-24:T>C-24:T>C	C/T	VU03	3391050	+	NA	NA	NA	NA	NA	NA	TT	TT	CC	TT	TT	CC	TT	TT	TT	CC	CC	CC	CC	CC	TT	CC	CT	TT	CC	CC	TT	CC	TT	TT	TT	TT	TT	CC	CC	CC	TT	CC	CC	TT	TT	TT	CC	TT	TT
14085685|F|0-8:T>A-8:T>A	T/A	VU03	3551982	+	NA	NA	NA	NA	NA	NA	TT	TT	AA	AA	TT	AA	AA	TT	TT	AA	AA	AA	AA	AA	AA	AA	AT	TT	AA	AA	TT	AT	TT	TT	TT	TT	TT	AA	TT	TT	TT	TT	AA	TT	TT	TT	AA	TT	TT
14085530|F|0-22:C>T-22:C>T	T/C	VU03	3580845	+	NA	NA	NA	NA	NA	NA	CC	CC	TT	TT	CC	TT	TT	CC	CC	TT	TT	TT	TT	TT	TT	TT	CT	CC	TT	TT	CC	TT	CC	CC	CC	CC	CC	TT	TT	TT	CC	TT	TT	CC	CC	CC	TT	CC	CC
14076859|F|0-39:T>A-39:T>A	T/A	VU03	3627875	+	NA	NA	NA	NA	NA	NA	TT	TT	AA	AA	TT	AA	AA	TT	TT	AA	AA	AA	AA	AA	NN	AA	AT	TT	AA	AA	TT	AA	TT	TT	TT	TT	TT	AA	NN	NN	TT	NN	AA	TT	TT	TT	AA	TT	TT
28203137|F|0-7:G>T-7:G>T	G/T	VU03	3695186	+	NA	NA	NA	NA	NA	NA	TT	TT	GG	GG	TT	GG	GG	TT	TT	GG	GG	GG	GG	GG	GG	GG	GT	TT	GG	GG	TT	GG	TT	TT	TT	TT	TT	GG	GG	GG	TT	GG	GG	TT	TT	TT	GG	TT	TT
14073627|F|0-67:G>A-67:G>A	A/G	VU03	3754356	+	NA	NA	NA	NA	NA	NA	GG	GG	AA	AA	GG	AA	AA	GG	GG	AA	AA	AA	AA	AA	AA	AA	AG	GG	AA	AA	GG	AA	GG	AG	GG	GG	GG	AA	AA	AA	AA	AA	AA	GG	GG	NN	AA	GG	GG
25354736|F|0-54:G>C-54:G>C	G/C	VU03	3834246	+	NA	NA	NA	NA	NA	NA	GG	GG	GG	GG	GG	GG	GG	GG	GG	GG	GG	GC	GG	GG	GG	GG	GG	GG	GG	GG	GG	GG	GG	GG	GG	GG	GG	GG	GG	GG	GG	GG	CC	GG	GG	GG	GG	GG	GG
25364119|F|0-23:G>A-23:G>A	A/G	VU03	3840333	+	NA	NA	NA	NA	NA	NA	AA	AA	GG	AA	AA	GG	AA	AA	AA	GG	GG	AA	GG	GG	AA	GG	AG	AA	GG	GG	AA	AA	AA	AA	AA	AA	AA	GG	AA	AA	AA	AA	AA	AA	AA	AA	GG	AA	AA
28497602|F|0-17:A>C-17:A>C	C/A	VU03	4139542	+	NA	NA	NA	NA	NA	NA	CC	CC	CC	CC	CC	CC	CC	CC	CC	AA	AA	CC	AA	AA	CC	AA	CC	CC	AA	AA	CC	AC	CC	CC	CC	CC	CC	AA	CC	CC	CC	CC	CC	CC	CC	CC	CC	CC	CC
100011421|F|0-9:A>G-9:A>G	A/G	VU03	4284517	+	NA	NA	NA	NA	NA	NA	AA	AA	AA	AA	AA	AA	AA	AA	AA	AA	AA	AA	AA	AA	AA	AA	AA	AA	AA	AA	AA	AA	AA	AA	AA	AA	AA	AA	AA	AA	AA	AA	AA	AA	AA	AA	AA	AA	AA
25355671|F|0-44:T>A-44:T>A	T/A	VU03	4386766	+	NA	NA	NA	NA	NA	NA	TT	TT	TT	TT	AA	TT	TT	TT	TT	TT	TT	TT	TT	TT	TT	TT	TT	TT	TT	TT	TT	TT	TT	TT	TT	TT	TT	TT	TT	TT	AA	TT	TT	TT	TT	TT	TT	TT	TT
14076715|F|0-33:A>C-33:A>C	A/C	VU03	4399068	+	NA	NA	NA	NA	NA	NA	AA	AA	AA	AA	CC	AA	AA	AA	AA	AA	AA	AA	AA	AA	AA	AA	AA	AA	AA	NN	AA	AA	AA	CC	AA	AA	AA	AA	AA	AA	CC	AA	AA	NN	AA	AA	AA	AA	AA
14076134|F|0-67:C>T-67:C>T	T/C	VU03	4399818	+	NA	NA	NA	NA	NA	NA	TT	TT	TT	TT	CC	TT	TT	TT	TT	TT	TT	TT	TT	TT	TT	TT	TT	NN	TT	TT	TT	NN	NN	CT	TT	TT	NN	TT	NN	NN	CC	TT	TT	TT	TT	NN	TT	TT	TT
42215673|F|0-61:G>A-61:G>A	A/G	VU03	4580956	+	NA	NA	NA	NA	NA	NA	AA	AA	AA	AA	AA	AA	AA	AA	AA	AA	AA	AA	AA	AA	NN	AA	AA	AA	AA	AA	AA	AA	AA	AA	AA	AA	AA	AA	AA	AA	AA	AA	AA	AA	AA	NN	AA	AA	NN
25364339|F|0-13:G>A-13:G>A	G/A	VU03	4635998	+	NA	NA	NA	NA	NA	NA	AA	AA	GG	GG	GG	GG	GG	AA	AA	GG	GG	GG	GG	GG	GG	GG	GG	AA	GG	GG	AA	NN	AA	AG	AA	AA	AA	GG	GG	GG	GG	GG	AG	AA	AA	GG	GG	AA	AA
25358520|F|0-34:A>T-34:A>T	A/T	VU03	4668565	+	NA	NA	NA	NA	NA	NA	AA	AA	AA	AA	AA	AA	AA	AA	AA	AA	AA	AA	AA	AA	AA	AA	AA	AA	AA	AA	AA	AA	AA	AA	AA	AA	AA	AA	AA	AA	AA	AA	AA	AA	AA	AA	AA	AA	AA
14076952|F|0-23:G>A-23:G>A	G/A	VU03	4699146	+	NA	NA	NA	NA	NA	NA	GG	AA	GG	GG	GG	GG	GG	AA	AA	GG	GG	GG	GG	GG	GG	GG	AG	AA	GG	GG	AA	GG	AA	AG	AA	AA	AA	GG	GG	GG	GG	GG	GG	AA	AA	GG	GG	AA	AA
100011354|F|0-63:A>T-63:A>T	T	VU03	4809294	+	NA	NA	NA	NA	NA	NA	TT	TT	TT	TT	TT	TT	TT	NN	TT	TT	TT	TT	TT	TT	TT	TT	TT	TT	TT	TT	TT	TT	TT	TT	TT	TT	TT	TT	TT	TT	TT	TT	TT	TT	TT	TT	TT	TT	TT
14079050|F|0-28:G>A-28:G>A	G/A	VU03	4809360	+	NA	NA	NA	NA	NA	NA	AA	GG	GG	GG	AA	AA	GG	GG	GG	GG	GG	GG	GG	GG	GG	GG	AG	GG	AA	GG	GG	AA	GG	AG	GG	GG	GG	AA	GG	GG	AA	GG	GG	GG	GG	AA	GG	GG	GG
25354782|F|0-61:C>A-61:C>A	C/A	VU03	4810224	+	NA	NA	NA	NA	NA	NA	CC	CC	CC	CC	CC	CC	CC	CC	CC	CC	CC	CC	CC	CC	CC	CC	CC	CC	CC	CC	CC	CC	CC	CC	CC	CC	CC	CC	CC	CC	CC	CC	CC	CC	CC	CC	CC	CC	CC
14079093|F|0-37:G>C-37:G>C	G/C	VU03	4820932	+	NA	NA	NA	NA	NA	NA	CC	GG	GG	GG	CC	GG	GG	GG	GG	GG	GG	GG	GG	GG	GG	GG	GG	GG	GG	GG	GG	GG	GG	GC	GG	GG	GG	GG	GG	GG	CC	GG	GG	GG	GG	CC	GG	GG	GG
14079093|F|0-39:T>G-39:T>G	T	VU03	4820932	+	NA	NA	NA	NA	NA	NA	NN	TT	TT	TT	NN	TT	TT	TT	TT	TT	TT	TT	TT	TT	TT	TT	TT	TT	TT	TT	TT	TT	TT	TT	TT	TT	TT	TT	TT	TT	TT	TT	TT	TT	TT	NN	TT	TT	TT
25363478|F|0-49:T>C-49:T>C	C/T	VU03	4931049	+	NA	NA	NA	NA	NA	NA	TT	TT	CC	CC	TT	CC	CC	TT	TT	CC	CC	CC	CC	CC	CC	CC	CC	TT	CC	CC	CC	CT	TT	CT	TT	TT	TT	CC	CC	CC	TT	CC	CC	TT	TT	TT	CC	TT	TT
25364380|F|0-21:T>G-21:T>G	T/G	VU03	4966383	+	NA	NA	NA	NA	NA	NA	TT	TT	TT	GG	TT	GG	GG	TT	TT	TT	TT	GG	GG	GG	GG	GG	GG	TT	GG	TT	TT	TT	TT	GT	TT	TT	TT	GG	GG	GG	NN	GG	GG	TT	TT	TT	TT	NN	TT
14076698|F|0-51:G>A-51:G>A	A/G	VU03	4974075	+	NA	NA	NA	NA	NA	NA	GG	AG	GG	AA	GG	AG	AA	GG	GG	AA	GG	AA	AA	AA	AA	AA	AA	GG	AA	AA	GG	AG	GG	AG	GG	GG	GG	AA	AA	AA	GG	AA	AA	AA	GG	NN	GG	GG	GG
14073760|F|0-36:T>C-36:T>C	C/T	VU03	5003206	+	NA	NA	NA	NA	NA	NA	TT	TT	TT	CC	TT	CC	CC	TT	TT	CC	TT	CC	CC	CC	CC	CC	CC	TT	CC	CC	TT	CT	NN	CC	TT	TT	TT	CC	CC	CC	TT	CC	CC	CC	TT	NN	TT	TT	TT
42774752|F|0-19:T>C-19:T>C	T/C	VU03	5128856	+	NA	NA	NA	NA	NA	NA	TT	TT	TT	TT	TT	TT	TT	TT	TT	TT	TT	TT	TT	TT	TT	TT	TT	TT	TT	TT	TT	TT	TT	TT	TT	TT	TT	TT	TT	TT	TT	TT	TT	NN	TT	TT	TT	NN	TT
100045008|F|0-34:G>A-34:G>A	G/A	VU03	5128922	+	NA	NA	NA	NA	NA	NA	GG	GG	GG	GG	GG	GG	GG	GG	GG	GG	GG	GG	GG	GG	GG	GG	GG	GG	GG	GG	GG	NN	GG	GG	GG	GG	GG	NN	GG	GG	GG	GG	GG	GG	GG	NN	GG	GG	GG
14056241|F|0-65:C>T-65:C>T	C/T	VU03	5200937	+	NA	NA	NA	NA	NA	NA	CC	CC	CC	CC	CC	CC	CC	CC	CC	CC	CC	CC	CC	CC	CC	CC	CC	CC	CC	CC	CC	CC	CC	CC	CC	CC	CC	CC	CC	CC	CC	CC	CC	CC	CC	CC	CC	CC	CC
14082250|F|0-12:A>T-12:A>T	A/T	VU03	5201003	+	NA	NA	NA	NA	NA	NA	AA	AA	NN	AA	AA	NN	AA	AA	AA	AA	AA	AA	AA	AA	AA	AA	TT	NN	AA	AA	NN	AA	AA	AA	AA	NN	AA	AA	AA	AA	NN	AA	AA	AA	AA	AA	AA	TT	AA
14075963|F|0-24:C>T-24:C>T	T/C	VU03	5406887	+	NA	NA	NA	NA	NA	NA	CC	CC	TT	TT	TT	TT	TT	TT	CC	TT	TT	TT	TT	TT	TT	TT	CC	CC	TT	TT	TT	TT	CC	CT	CC	TT	CC	TT	TT	TT	TT	TT	TT	CC	CC	CC	TT	CC	CC
14084209|F|0-15:C>T-15:C>T	T/C	VU03	5406953	+	NA	NA	NA	NA	NA	NA	CC	CC	TT	TT	TT	TT	TT	TT	CC	TT	TT	TT	TT	TT	TT	TT	CC	CC	TT	TT	TT	TT	CC	CT	CC	TT	CC	TT	TT	TT	TT	TT	TT	CC	CC	CC	TT	CC	CC
14075072|F|0-44:A>T-44:A>T	A/T	VU03	5414685	+	NA	NA	NA	NA	NA	NA	TT	TT	AA	AA	AA	AA	AA	AA	TT	AA	AA	AA	AA	AA	AA	AA	TT	TT	AA	AA	AA	AA	TT	AT	TT	AA	TT	AA	AA	AA	AA	AA	AA	TT	TT	TT	AA	TT	TT
14073806|F|0-49:T>A-49:T>A	T/A	VU03	5459821	+	NA	NA	NA	NA	NA	NA	AA	AA	TT	TT	TT	TT	TT	TT	AA	TT	TT	TT	TT	TT	TT	TT	AA	AA	TT	TT	TT	TT	AA	AT	AA	TT	AA	TT	TT	TT	TT	TT	TT	AA	AA	AA	TT	AA	AA
14075990|F|0-44:G>T-44:G>T	G/T	VU03	5563142	+	NA	NA	NA	NA	NA	NA	TT	TT	GG	GG	GG	GG	GG	TT	TT	GG	GG	GG	GG	GG	GG	GG	GT	TT	GG	GG	GG	GG	TT	TT	TT	GG	TT	GG	GG	GG	GG	GG	GG	TT	GG	GG	GG	GG	TT
14057220|F|0-34:C>A-34:C>A	C/A	VU03	5593617	+	NA	NA	NA	NA	NA	NA	CC	CC	CC	CC	CC	CC	CC	CC	CC	CC	CC	CC	CC	CC	CC	CC	CC	CC	CC	CC	CC	AC	CC	CC	CC	CC	CC	CC	CC	CC	CC	CC	CC	CC	CC	CC	CC	CC	CC
25357938|F|0-12:A>G-12:A>G	A/G	VU03	5606620	+	NA	NA	NA	NA	NA	NA	AA	AA	AA	AA	AA	AA	AA	AA	AA	AA	AA	AA	AA	AA	AA	AA	AA	AA	AA	AA	AA	NN	AA	AA	AA	AA	AA	AA	AA	AA	AA	AA	AA	AA	AA	AA	AA	AA	AA
14076540|F|0-50:C>T-50:C>T	C/T	VU03	5657053	+	NA	NA	NA	NA	NA	NA	TT	TT	CC	CC	CC	CC	CC	TT	TT	CC	CC	CC	CC	CC	CC	CC	CT	CC	CC	CC	CC	NN	CC	CC	CC	CC	CT	CC	CC	CC	CC	CC	CC	CC	CC	NN	CC	CC	TT
35152640|F|0-46:G>A-46:G>A	A/G	VU03	5667649	+	NA	NA	NA	NA	NA	NA	GG	GG	AA	AA	AA	AA	AA	GG	GG	AA	NN	AA	AA	AA	AA	AA	AA	AA	AA	AA	AA	AA	AA	AG	AA	AA	AA	AA	NN	AA	AA	AA	AA	GG	AA	NN	AA	AA	GG
14076696|F|0-38:G>A-38:G>A	A/G	VU03	5712028	+	NA	NA	NA	NA	NA	NA	GG	GG	AA	AA	AA	AA	AA	AA	GG	AA	AA	AA	AA	AA	AA	AA	AA	AA	AA	AA	AA	AA	AA	GG	AA	AA	AG	AA	AA	GG	AA	GG	AA	GG	AA	NN	AA	AA	GG
14078079|F|0-30:C>T-30:C>T	T/C	VU03	5713511	+	NA	NA	NA	NA	NA	NA	CC	CC	NN	TT	TT	TT	NN	TT	CC	TT	TT	TT	TT	TT	TT	TT	TT	TT	TT	TT	TT	NN	TT	NN	TT	TT	NN	TT	TT	TT	NN	TT	NN	NN	NN	NN	TT	TT	NN
14076940|F|0-41:T>A-41:T>A	T/A	VU03	5734180	+	NA	NA	NA	NA	NA	NA	AA	AA	TT	TT	TT	TT	TT	TT	AA	TT	TT	TT	TT	TT	TT	TT	TT	TT	TT	NN	TT	TT	TT	AT	TT	TT	AT	TT	TT	TT	TT	NN	TT	AA	TT	AA	TT	NN	AA
14077480|F|0-14:G>T-14:G>T	T/G	VU03	5973225	+	NA	NA	NA	NA	NA	NA	TT	TT	TT	GG	TT	TT	GG	TT	TT	TT	TT	TT	TT	TT	TT	TT	TT	TT	GG	TT	TT	TT	TT	TT	TT	TT	TT	GG	TT	GG	TT	TT	TT	TT	TT	TT	TT	TT	TT
14076945|F|0-46:G>A-46:G>A	G/A	VU03	5974729	+	NA	NA	NA	NA	NA	NA	GG	GG	GG	GG	GG	GG	GG	GG	GG	GG	GG	GG	GG	GG	GG	GG	GG	GG	GG	GG	GG	GG	GG	GG	GG	GG	GG	GG	GG	GG	GG	GG	GG	GG	GG	NN	GG	GG	GG
14074751|F|0-59:T>G-59:T>G	T/G	VU03	6037437	+	NA	NA	NA	NA	NA	NA	TT	TT	TT	GG	TT	TT	GG	TT	GG	TT	TT	TT	TT	TT	TT	TT	GT	GG	GG	TT	TT	TT	TT	TT	TT	TT	GT	GG	TT	GT	TT	TT	TT	TT	TT	TT	TT	TT	GG
14073549|F|0-16:A>G-16:A>G	G/A	VU03	6095365	+	NA	NA	NA	NA	NA	NA	GG	GG	GG	GG	GG	GG	GG	GG	AA	GG	GG	GG	GG	GG	GG	GG	AG	AA	GG	GG	GG	GG	GG	GG	GG	GG	AA	GG	GG	GG	AA	GG	GG	AA	AA	AA	GG	GG	AA
25363490|F|0-27:T>C-27:T>C	C/T	VU03	6124128	+	NA	NA	NA	NA	NA	NA	TT	TT	CC	CC	TT	CC	CC	CC	TT	CC	CC	CC	CC	CC	CC	CC	CT	TT	CC	CC	CC	CC	TT	CT	CC	CC	TT	CC	CC	CC	TT	CC	CC	TT	TT	TT	CC	CC	TT
14073433|F|0-43:T>C-43:T>C	C/T	VU03	6130867	+	NA	NA	NA	NA	NA	NA	TT	TT	CC	CC	TT	CC	CC	CC	TT	CC	CC	CC	CC	CC	CC	CC	CT	TT	CC	CC	CC	CC	TT	CC	CC	CC	TT	CC	CC	CC	TT	CC	CC	TT	TT	TT	CC	CC	CT
28202897|F|0-60:G>A-60:G>A	G/A	VU03	6130933	+	NA	NA	NA	NA	NA	NA	AA	AA	GG	GG	AA	GG	GG	GG	AA	GG	GG	GG	GG	GG	GG	GG	AG	AA	NN	GG	GG	GG	NN	GG	GG	GG	NN	GG	GG	NN	AA	GG	GG	AA	AA	AA	GG	GG	NN
14074269|F|0-6:G>A-6:G>A	A/G	VU03	6132199	+	NA	NA	NA	NA	NA	NA	GG	GG	AA	AA	GG	AA	AA	AA	GG	AA	AA	AA	AA	AA	AA	AA	AG	GG	AA	AA	AA	AA	GG	AG	AA	AA	GG	AA	AA	AA	GG	AA	AA	GG	GG	GG	AA	AA	GG
14078118|F|0-12:C>A-12:C>A	A/C	VU03	6136968	+	NA	NA	NA	NA	NA	NA	CC	CC	AA	AA	CC	AA	AA	AA	CC	AA	AA	AA	AA	AA	AA	AA	AC	CC	AA	AA	AA	AA	CC	AC	AA	AA	CC	AA	AA	AA	CC	AA	AA	CC	CC	CC	AA	AA	CC
28203005|F|0-7:T>A-7:T>A	T/A	VU03	6429140	+	NA	NA	NA	NA	NA	NA	TT	TT	TT	TT	TT	TT	TT	TT	TT	TT	TT	AA	TT	TT	AA	TT	TT	TT	TT	TT	TT	TT	TT	TT	TT	TT	AT	TT	AA	AT	TT	TT	AA	TT	TT	TT	TT	TT	TT
14057520|F|0-19:T>C-19:T>C	T/C	VU03	6450327	+	NA	NA	NA	NA	NA	NA	TT	TT	TT	TT	TT	TT	TT	TT	TT	TT	CC	TT	TT	TT	TT	TT	TT	TT	TT	TT	TT	TT	CT	TT	TT	TT	TT	TT	TT	TT	TT	TT	TT	TT	TT	TT	TT	TT	TT
14077992|F|0-48:T>C-48:T>C	C/T	VU03	6529899	+	NA	NA	NA	NA	NA	NA	NN	NN	CC	CC	CC	CC	CC	CC	NN	CC	CC	CC	CC	CC	CC	CC	CC	NN	CC	CC	CC	CC	CC	CC	CC	NN	TT	CC	CC	CC	TT	CC	CC	NN	TT	CC	CC	NN	NN
14081890|F|0-61:T>C-61:T>C	T/C	VU03	6631527	+	NA	NA	NA	NA	NA	NA	NN	NN	TT	TT	NN	CC	TT	CC	CC	TT	TT	TT	TT	TT	CC	TT	CC	NN	TT	TT	TT	TT	NN	CC	CC	CC	NN	TT	TT	TT	NN	TT	TT	CC	NN	NN	TT	CC	CC
14077335|F|0-18:T>A-18:T>A	A/T	VU03	6632378	+	NA	NA	NA	NA	NA	NA	TT	TT	AA	AA	TT	TT	AA	TT	TT	AA	AA	AA	AA	AA	TT	AA	TT	TT	AA	AA	AA	AA	TT	TT	TT	TT	TT	AA	AA	AA	AT	AA	AA	TT	TT	NN	AA	TT	TT
35153048|F|0-8:T>C-8:T>C	C/T	VU03	6675319	+	NA	NA	NA	NA	NA	NA	TT	TT	CC	NN	TT	CC	NN	CC	CC	CC	CC	CC	CC	CC	NN	CC	CC	CC	NN	CC	CC	CC	TT	CC	CC	CC	TT	NN	CC	CC	CC	CC	CC	NN	TT	TT	CC	CC	CC
35153702|F|0-48:G>A-48:G>A	G/A	VU03	6704277	+	NA	NA	NA	NA	NA	NA	NN	AA	GG	GG	AA	GG	GG	NN	AA	GG	GG	GG	GG	GG	GG	GG	GG	AA	NN	GG	GG	GG	AA	GG	GG	GG	AA	NN	NN	NN	AA	GG	GG	GG	AA	AA	GG	GG	GG
14082283|F|0-28:G>T-28:G>T	G/T	VU03	6733618	+	NA	NA	NA	NA	NA	NA	TT	TT	GG	GG	GG	GG	GG	GG	TT	GG	GG	GG	GG	GG	GG	GG	GG	GG	GG	GG	GG	GG	TT	GG	GG	GG	GG	GG	GG	GG	GG	GG	GG	GG	TT	TT	GG	GG	GG
14074222|F|0-49:G>C-49:G>C	G/C	VU03	6735827	+	NA	NA	NA	NA	NA	NA	CC	CC	GG	GG	GG	GG	GG	GG	CC	GG	GG	GG	GG	GG	GG	GG	GG	GG	GG	GG	GG	GG	CC	GG	GG	GG	GG	GG	GG	GG	GG	NN	GG	GG	CC	NN	GG	GG	GG
14084998|F|0-63:A>G-63:A>G	A/G	VU03	6782693	+	NA	NA	NA	NA	NA	NA	AA	AA	GG	GG	AA	AA	GG	AA	AA	GG	GG	AA	GG	GG	AA	GG	AA	AA	GG	GG	GG	GG	AA	AA	AA	AA	AA	GG	AA	AA	AA	AA	AA	AA	AA	AA	GG	AA	AA
14079941|F|0-13:G>A-13:G>A	A/G	VU03	6787364	+	NA	NA	NA	NA	NA	NA	AA	AA	GG	GG	AA	AA	GG	AA	AA	GG	GG	AA	GG	GG	AA	GG	AA	AA	GG	GG	GG	GG	AA	AA	AA	AA	AA	GG	AA	AA	AA	AA	AA	AA	AA	AA	GG	AA	AA
14077601|F|0-34:G>A-34:G>A	A/G	VU03	6859178	+	NA	NA	NA	NA	NA	NA	AA	AA	AA	AA	GG	AA	AA	GG	AA	AA	AA	AA	AA	AA	AA	AA	AG	GG	AA	AA	AA	AA	AA	AA	AA	AA	GG	AA	AA	AA	GG	AA	AA	AA	GG	AA	AA	AA	AA
14062337|F|0-67:T>A-67:T>A	A/T	VU03	6859244	+	NA	NA	NA	NA	NA	NA	NN	NN	AA	AA	TT	AA	AA	TT	NN	AA	AA	AA	AA	AA	AA	AA	AT	TT	AA	AA	AA	AA	NN	AA	AA	AA	TT	AA	AA	AA	TT	NN	AA	AA	TT	NN	AA	AA	AA
35154801|F|0-61:T>C-61:T>C	C/T	VU03	6859244	+	NA	NA	NA	NA	NA	NA	TT	TT	CC	CC	NN	CC	CC	NN	TT	CC	CC	CC	CC	CC	CC	CC	CC	NN	CC	CC	CC	CC	TT	CC	CC	CC	NN	CC	CC	CC	NN	NN	CC	CC	NN	TT	CC	CC	CC
14078997|F|0-6:G>C-6:G>C	G/C	VU03	6868883	+	NA	NA	NA	NA	NA	NA	NN	NN	GG	GG	GG	GG	GG	GG	NN	GG	GG	CC	GG	GG	NN	GG	GG	GG	GG	GG	GG	GG	NN	GG	GG	GG	GG	GG	CC	GC	GG	NN	CC	GG	GG	NN	GG	GG	GG
14078997|F|0-7:C>T-7:C>T	C/T	VU03	6868883	+	NA	NA	NA	NA	NA	NA	TT	TT	CC	CC	CC	CC	CC	CC	TT	CC	CC	NN	CC	CC	NN	CC	CC	CC	CC	CC	CC	CC	TT	CC	CC	CC	CC	CC	NN	CC	CC	NN	NN	CC	CC	TT	CC	CC	CC
14073571|F|0-60:T>C-60:T>C	C/T	VU03	6967013	+	NA	NA	NA	NA	NA	NA	TT	TT	CC	CC	TT	CC	CC	TT	TT	CC	CC	CC	CC	CC	CC	CC	CT	TT	CC	CC	CC	CC	TT	CC	TT	CC	TT	CC	CC	CC	TT	CC	CC	TT	TT	TT	CC	CC	CC
25354950|F|0-11:G>C-11:G>C	G/C	VU03	6975173	+	NA	NA	NA	NA	NA	NA	CC	CC	GG	GG	CC	GG	GG	GG	CC	GG	GG	GG	GG	GG	GG	GG	GG	GG	GG	GG	GG	GG	GG	GG	GG	GG	GG	GG	GG	GG	GG	GG	GG	GG	GG	CC	GG	GG	GG
14085744|F|0-18:A>G-18:A>G	A/G	VU03	6975267	+	NA	NA	NA	NA	NA	NA	AA	AA	AA	AA	AA	AA	AA	AA	AA	AA	AA	AA	AA	AA	AA	AA	AA	AA	AA	AA	AA	AA	AA	AA	AA	AA	AA	AA	AA	AA	AA	AA	AA	GG	GG	AA	AA	AA	AA
14081806|F|0-64:G>T-64:G>T	T/G	VU03	6976917	+	NA	NA	NA	NA	NA	NA	GG	GG	TT	TT	GG	TT	TT	NN	GG	TT	TT	TT	TT	TT	TT	TT	TT	NN	TT	TT	TT	TT	NN	TT	NN	TT	NN	TT	TT	TT	NN	TT	TT	GG	GG	NN	TT	TT	TT
14076011|F|0-52:A>T-52:A>T	T/A	VU03	7005284	+	NA	NA	NA	NA	NA	NA	AA	AA	TT	TT	AA	TT	TT	AA	AA	TT	TT	TT	TT	TT	TT	TT	AT	AA	TT	TT	NN	TT	AA	TT	AA	TT	AA	TT	TT	TT	AA	TT	TT	AA	AA	AA	TT	NN	TT
14082709|F|0-45:T>C-45:T>C	T/C	VU03	7063329	+	NA	NA	NA	NA	NA	NA	TT	CC	TT	CC	TT	CC	CC	CC	TT	TT	TT	CC	TT	CC	CC	TT	CT	TT	CC	CC	TT	CT	TT	CC	TT	TT	TT	CC	CC	CC	TT	CC	CC	TT	TT	TT	TT	TT	TT
28497827|F|0-57:C>T-57:C>T	T/C	VU03	7090645	+	NA	NA	NA	NA	NA	NA	TT	TT	CC	TT	TT	TT	TT	TT	TT	CC	CC	TT	CC	TT	TT	CC	CC	CC	TT	TT	CC	TT	CC	TT	CC	CC	CC	TT	TT	TT	CC	TT	TT	NN	CC	TT	CC	CC	CC
14078397|F|0-31:T>C-31:T>C	T/C	VU03	7104189	+	NA	NA	NA	NA	NA	NA	TT	TT	TT	TT	TT	TT	TT	NN	TT	TT	TT	TT	TT	TT	TT	TT	TT	NN	TT	TT	TT	TT	CC	TT	CC	NN	NN	TT	TT	TT	TT	TT	TT	CC	NN	TT	TT	NN	TT
35153377|F|0-17:A>T-17:A>T	T/A	VU03	7106382	+	NA	NA	NA	NA	NA	NA	TT	TT	TT	TT	TT	TT	TT	TT	TT	TT	TT	TT	TT	TT	TT	TT	TT	TT	NN	TT	NN	TT	AA	TT	AA	TT	TT	TT	TT	TT	TT	TT	NN	AA	TT	TT	NN	NN	TT
35153377|F|0-47:C>A-47:C>A	C	VU03	7106382	+	NA	NA	NA	NA	NA	NA	CC	CC	CC	CC	CC	CC	CC	CC	CC	CC	CC	CC	CC	CC	CC	CC	CC	CC	NN	CC	NN	CC	NN	CC	NN	CC	CC	CC	CC	CC	CC	CC	NN	NN	CC	CC	NN	NN	CC
14074763|F|0-5:A>C-5:A>C	A/C	VU03	7108964	+	NA	NA	NA	NA	NA	NA	AA	AA	AA	AA	AA	AA	AA	AA	AA	AA	AA	AA	AA	AA	AA	AA	AA	AA	AA	AA	AA	AA	CC	AA	CC	AA	AA	AA	AA	AA	AA	AA	AA	CC	AA	AA	AA	AA	AA
14056632|F|0-37:G>A-37:G>A	G	VU03	7109030	+	NA	NA	NA	NA	NA	NA	GG	GG	GG	GG	GG	GG	GG	GG	GG	GG	GG	GG	GG	GG	GG	GG	GG	GG	GG	GG	GG	GG	GG	GG	GG	GG	GG	GG	GG	GG	GG	GG	GG	GG	GG	NN	GG	GG	GG
14079476|F|0-9:T>A-9:T>A	T/A	VU03	7149479	+	NA	NA	NA	NA	NA	NA	TT	TT	TT	TT	AA	TT	TT	AA	TT	TT	TT	TT	TT	TT	TT	TT	AT	AA	TT	TT	TT	TT	TT	TT	TT	AA	AA	TT	TT	TT	TT	TT	TT	NN	AA	TT	TT	AA	NN
14081626|F|0-36:G>T-36:G>T	G/T	VU03	7149519	+	NA	NA	NA	NA	NA	NA	GG	GG	GG	GG	TT	GG	GG	TT	GG	GG	GG	GG	GG	GG	GG	GG	GT	TT	GG	GG	GG	GG	NN	GG	NN	TT	TT	GG	GG	GG	GG	GG	GG	GG	TT	GG	GG	TT	GG
14082165|F|0-9:C>T-9:C>T	T/C	VU03	7236566	+	NA	NA	NA	NA	NA	NA	TT	NN	TT	TT	CC	TT	TT	TT	CC	TT	TT	TT	TT	TT	TT	TT	CT	CC	TT	TT	TT	TT	CC	CT	TT	CC	CC	TT	TT	TT	TT	TT	TT	TT	CC	TT	TT	NN	TT
14076375|F|0-44:A>G-44:A>G	A/G	VU03	7308926	+	NA	NA	NA	NA	NA	NA	AA	GG	AA	AA	AA	AA	AA	AA	AA	AA	AA	AA	AA	AA	AA	AA	AA	AA	AA	AA	AA	AA	AA	AA	AA	AA	AA	AA	AA	AA	AA	AA	AA	AA	AA	AA	AA	AA	AA
14076241|F|0-9:A>T-9:A>T	A/T	VU03	7312441	+	NA	NA	NA	NA	NA	NA	TT	TT	AA	AA	AA	AA	AA	TT	AA	AA	AA	AA	AA	AA	AA	AA	AA	AA	AA	AA	AA	AA	AA	AA	TT	TT	AA	AA	AA	AA	TT	AA	AA	TT	AA	TT	AA	TT	TT
14087229|F|0-32:G>T-32:G>T	T/G	VU03	7331661	+	NA	NA	NA	NA	NA	NA	GG	NN	NN	TT	GG	TT	TT	GG	GG	TT	NN	TT	TT	TT	TT	TT	GT	GG	TT	TT	NN	TT	GG	GT	GG	GG	GG	TT	TT	TT	GG	TT	TT	GG	GG	GG	NN	GG	GG
14081835|F|0-57:G>A-57:G>A	A/G	VU03	7374214	+	NA	NA	NA	NA	NA	NA	GG	AA	AA	AA	AA	AA	AA	AA	AA	AA	AA	AA	AA	AA	AA	AA	AA	AA	AA	AA	AA	AA	AA	AA	NN	NN	AA	AA	AA	AA	GG	AA	AA	GG	AA	GG	AA	AA	GG
25365845|F|0-9:C>T-9:C>T	T/C	VU03	7437945	+	NA	NA	NA	NA	NA	NA	CC	CC	TT	TT	CC	TT	TT	CC	CC	TT	TT	TT	TT	TT	TT	TT	CT	CC	TT	TT	TT	TT	CC	CT	CC	CC	CC	TT	TT	TT	CC	TT	TT	CC	CC	CC	TT	CC	CC
14074878|F|0-53:C>G-53:C>G	G/C	VU03	7471158	+	NA	NA	NA	NA	NA	NA	CC	GG	GG	GG	CC	GG	GG	CC	CC	GG	GG	GG	GG	GG	GG	GG	GG	CC	GG	GG	GG	GG	CC	GC	CC	GG	CC	GG	GG	GG	CC	GG	NN	GG	GG	NN	GG	NN	GG
14082349|F|0-35:A>G-35:A>G	G/A	VU03	7471823	+	NA	NA	NA	NA	NA	NA	AA	GG	GG	GG	AA	GG	GG	NN	AA	NN	GG	GG	GG	GG	GG	GG	GG	AA	GG	GG	GG	GG	AA	GG	GG	GG	AA	NN	GG	GG	NN	GG	GG	NN	GG	NN	GG	GG	GG
35154068|F|0-62:T>C-62:T>C	C/T	VU03	7476978	+	NA	NA	NA	NA	NA	NA	TT	CC	CC	CC	TT	CC	CC	TT	TT	CC	NN	CC	CC	CC	CC	CC	CC	NN	CC	CC	CC	NN	TT	CT	TT	CC	TT	CC	CC	CC	CC	CC	CC	CC	CC	TT	CC	CC	CC
14082519|F|0-5:C>G-5:C>G	G/C	VU03	7477044	+	NA	NA	NA	NA	NA	NA	CC	NN	GG	GG	CC	GG	GG	CC	CC	GG	GG	GG	GG	GG	GG	GG	GG	GG	GG	GG	GG	GG	CC	GC	CC	GG	CC	GG	GG	GG	NN	GG	GG	NN	NN	CC	GG	GG	GG
14077236|F|0-51:G>T-51:G>T	G/T	VU03	7482177	+	NA	NA	NA	NA	NA	NA	TT	TT	GG	GG	TT	GG	GG	TT	TT	GG	GG	GG	GG	GG	GG	GG	GT	TT	GG	GG	GG	GG	TT	GT	TT	TT	TT	GG	GG	GG	TT	GG	GG	TT	TT	TT	GG	TT	TT
14082893|F|0-12:T>C-12:T>C	T/C	VU03	7483682	+	NA	NA	NA	NA	NA	NA	NN	TT	TT	TT	NN	TT	TT	TT	NN	TT	TT	TT	TT	TT	TT	TT	TT	CC	TT	TT	TT	TT	NN	TT	TT	TT	CC	TT	TT	TT	CC	TT	TT	TT	TT	NN	TT	TT	TT
14075700|F|0-66:T>G-66:T>G	T/G	VU03	7501650	+	NA	NA	NA	NA	NA	NA	TT	TT	TT	TT	TT	TT	TT	GG	TT	TT	TT	TT	TT	TT	TT	TT	TT	GG	TT	TT	TT	TT	TT	GT	GG	TT	GT	TT	TT	TT	GT	TT	TT	TT	TT	TT	TT	TT	TT
25353257|F|0-47:C>G-47:C>G	C/G	VU03	7507812	+	NA	NA	NA	NA	NA	NA	GG	CC	CC	CC	GG	CC	CC	GG	CC	CC	CC	CC	CC	CC	CC	CC	CC	GG	CC	CC	CC	CC	GG	GC	GG	CC	GG	CC	CC	CC	GG	CC	CC	CC	CC	GG	CC	CC	CC
42215508|F|0-47:T>G-47:T>G	T/G	VU03	7509057	+	NA	NA	NA	NA	NA	NA	TT	TT	TT	TT	TT	TT	TT	TT	TT	TT	TT	TT	TT	TT	TT	TT	TT	TT	TT	TT	TT	TT	TT	TT	NN	TT	TT	TT	TT	NN	TT	TT	NN	GG	TT	TT	TT	TT	NN
42215408|F|0-40:C>T-40:C>T	C/T	VU03	7509777	+	NA	NA	NA	NA	NA	NA	TT	CC	CC	CC	TT	CC	CC	CC	CC	CC	CC	CC	CC	CC	CC	CC	CC	CC	CC	CC	CC	CC	TT	CC	CC	CC	TT	CC	CC	CC	CC	CC	CC	CC	CC	NN	CC	NN	CC
25363602|F|0-19:C>T-19:C>T	C	VU03	7595246	+	NA	NA	NA	NA	NA	NA	CC	CC	CC	CC	CC	CC	CC	CC	CC	NN	CC	CC	CC	CC	CC	CC	CC	CC	CC	CC	CC	CC	CC	CC	NN	NN	CC	CC	CC	CC	CC	CC	CC	CC	CC	NN	CC	NN	CC
25363602|F|0-38:A>T-38:A>T	T/A	VU03	7595246	+	NA	NA	NA	NA	NA	NA	TT	TT	TT	TT	TT	TT	TT	TT	TT	NN	TT	TT	TT	TT	TT	TT	TT	TT	TT	TT	TT	TT	TT	AT	NN	AA	TT	TT	TT	TT	TT	TT	TT	TT	TT	NN	TT	NN	TT
35154176|F|0-16:T>C-16:T>C	T/C	VU03	7595312	+	NA	NA	NA	NA	NA	NA	TT	TT	TT	TT	CT	TT	TT	TT	TT	NN	TT	TT	TT	TT	TT	TT	TT	TT	TT	TT	TT	TT	TT	CT	TT	NN	TT	TT	TT	TT	TT	TT	TT	NN	TT	NN	TT	CC	TT
14087037|F|0-44:G>A-44:G>A	A/G	VU03	7596295	+	NA	NA	NA	NA	NA	NA	AA	AA	AA	AA	GG	NN	AA	AA	AA	NN	AA	AA	AA	AA	AA	AA	AA	GG	AA	AA	AA	AA	GG	AG	AA	GG	GG	AA	AA	AA	GG	AA	AA	AA	GG	AA	AA	GG	AA
14085025|F|0-11:T>G-11:T>G	T/G	VU03	7604227	+	NA	NA	NA	NA	NA	NA	TT	TT	TT	TT	GT	GT	TT	TT	TT	TT	TT	TT	TT	TT	TT	TT	GT	GT	GT	TT	TT	TT	GT	GT	TT	GG	GT	TT	TT	TT	GT	TT	TT	TT	GT	TT	TT	GG	TT
14085026|F|0-49:C>T-49:C>T	T/C	VU03	7604227	+	NA	NA	NA	NA	NA	NA	TT	TT	TT	TT	CC	NN	TT	TT	TT	NN	TT	TT	TT	TT	TT	TT	TT	CT	TT	TT	TT	TT	CT	TT	TT	NN	CC	TT	TT	TT	CC	TT	TT	TT	CC	TT	TT	NN	TT
14085027|F|0-66:G>A-66:G>A	A/G	VU03	7604227	+	NA	NA	NA	NA	NA	NA	AA	AA	AA	AA	GG	GG	AA	AA	AA	NN	AA	AA	AA	AA	AA	AA	AG	AG	AG	AA	AA	AA	AG	AG	AA	GG	GG	AA	AA	AA	GG	AA	AA	AA	GG	AA	AA	GG	AA
14084641|F|0-57:G>A-57:G>A	G/A	VU03	7604293	+	NA	NA	NA	NA	NA	NA	GG	GG	GG	GG	AG	GG	GG	GG	AG	NN	GG	GG	NN	GG	GG	GG	GG	AG	GG	GG	GG	GG	AG	AG	GG	AA	AG	GG	GG	GG	AG	GG	GG	GG	AG	GG	GG	AA	GG
25365679|F|0-6:T>A-6:T>A	T/A	VU03	7604293	+	NA	NA	NA	NA	NA	NA	TT	TT	TT	TT	AT	TT	TT	TT	AT	TT	TT	TT	TT	TT	TT	TT	TT	AT	TT	TT	TT	TT	AT	AT	TT	AA	AT	TT	TT	TT	AT	TT	TT	TT	AT	NN	TT	AA	TT
35154061|F|0-21:C>T-21:C>T	C/T	VU03	7623209	+	NA	NA	NA	NA	NA	NA	CC	CC	CC	CC	CT	TT	CC	CC	NN	CC	NN	CC	NN	CC	CC	CC	CT	CT	CC	CC	NN	CC	CT	CC	CC	NN	CC	CC	CC	CC	CC	NN	NN	CC	TT	CC	CC	NN	CC
14075537|F|0-39:A>T-39:A>T	T/A	VU03	7626609	+	NA	NA	NA	NA	NA	NA	TT	TT	TT	TT	AA	NN	TT	TT	TT	TT	TT	TT	TT	TT	TT	TT	TT	AA	TT	TT	TT	TT	AA	TT	TT	NN	AA	TT	TT	TT	AA	TT	TT	TT	AA	TT	TT	NN	TT
14073781|F|0-44:T>C-44:T>C	T/C	VU03	7675248	+	NA	NA	NA	NA	NA	NA	TT	TT	TT	TT	CC	CC	TT	TT	TT	TT	TT	TT	TT	TT	TT	TT	CT	TT	TT	TT	TT	TT	CC	TT	TT	TT	TT	TT	TT	TT	TT	TT	TT	TT	CC	TT	TT	TT	TT
14076688|F|0-60:T>C-60:T>C	T/C	VU03	7705956	+	NA	NA	NA	NA	NA	NA	TT	TT	TT	TT	CT	TT	TT	TT	TT	TT	TT	TT	TT	TT	TT	TT	TT	TT	TT	TT	TT	TT	CC	TT	TT	TT	CT	TT	TT	TT	TT	TT	TT	TT	CC	TT	TT	TT	TT
35153512|F|0-68:T>C-68:T>C	C/T	VU03	7731666	+	NA	NA	NA	NA	NA	NA	CC	CC	CC	CC	NN	TT	CC	CC	CC	CC	CC	CC	TT	NN	TT	CC	CT	CC	CC	NN	CC	TT	CC	CC	CC	NN	TT	CC	CC	CC	NN	NN	CC	TT	TT	CC	CC	TT	CC
14076376|F|0-58:T>G-58:T>G	T/G	VU03	7731732	+	NA	NA	NA	NA	NA	NA	TT	TT	TT	TT	GG	TT	TT	TT	TT	TT	TT	TT	TT	TT	NN	TT	TT	TT	TT	TT	TT	TT	TT	TT	TT	NN	GT	TT	TT	TT	TT	TT	TT	GG	GG	TT	TT	NN	TT
35154855|F|0-59:G>T-59:G>T	G/T	VU03	7754396	+	NA	NA	NA	NA	NA	NA	GG	GG	GG	GG	TT	GG	GT	GG	GG	GG	GG	GG	GG	GG	GG	GG	GG	GG	GG	NN	GG	NN	GG	GG	GG	GG	NN	GG	GG	GG	GG	GG	NN	TT	TT	NN	GG	GG	NN
14075925|F|0-13:G>A-13:G>A	A/G	VU03	7802349	+	NA	NA	NA	NA	NA	NA	AA	AA	AA	AG	GG	GG	AA	AA	AA	AA	AA	AA	AA	AA	AA	AA	AG	AA	AG	AA	AA	AA	AA	AA	AA	AA	NN	AA	AA	AA	AA	AA	AA	GG	GG	NN	AA	AA	AA
14074666|F|0-20:G>C-20:G>C	G/C	VU03	7813817	+	NA	NA	NA	NA	NA	NA	GG	GG	GG	GG	CC	GG	GG	GG	GG	GG	GG	GG	GG	GG	GG	GG	GG	GG	GG	GG	GG	GG	GG	GG	GG	GG	GC	GG	GG	GG	GG	GG	GG	CC	CC	GG	GG	GG	GG
35154538|F|0-61:G>A-61:G>A	G/A	VU03	7821792	+	NA	NA	NA	NA	NA	NA	GG	GG	GG	GG	NN	AA	GG	GG	GG	GG	GG	GG	GG	GG	GG	GG	AG	GG	GG	GG	GG	GG	GG	GG	GG	GG	GG	GG	GG	GG	GG	GG	GG	NN	NN	GG	GG	GG	GG
35154539|F|0-48:T>C-48:T>C	C/T	VU03	7821792	+	NA	NA	NA	NA	NA	NA	CC	CC	CC	CC	TT	NN	CC	CC	CC	CC	CC	CC	CC	CC	CC	CC	CC	CC	CC	CC	CC	CC	CC	CC	CC	CC	CT	CC	CC	CC	CC	CC	CC	TT	TT	CC	CC	CC	CC
28497271|F|0-16:T>G-16:T>G	G/T	VU03	7821858	+	NA	NA	NA	NA	NA	NA	GG	GG	GG	GG	TT	GG	GG	GG	GG	GG	GG	GG	GG	GG	GG	GG	GG	GG	GG	GG	GG	GG	GG	GG	GG	GG	NN	GG	GG	GG	GG	GG	GG	GG	TT	GG	GG	GG	GG
35153130|F|0-61:T>C-61:T>C	T/C	VU03	7868880	+	NA	NA	NA	NA	NA	NA	TT	TT	TT	TT	CC	TT	TT	TT	TT	TT	TT	TT	TT	TT	TT	TT	TT	TT	TT	TT	TT	TT	TT	TT	TT	TT	CT	TT	NN	TT	TT	TT	TT	CC	CC	NN	TT	TT	TT
14087450|F|0-49:C>T-49:C>T	C/T	VU03	7868946	+	NA	NA	NA	NA	NA	NA	CC	CC	CC	CC	NN	TT	CC	CC	CC	CC	CC	CC	TT	CC	CC	CC	CT	CC	CC	CC	CC	CC	CC	CC	CC	CC	CC	CC	CC	CC	CC	CC	CC	NN	NN	CC	CC	CC	CC
25356782|F|0-6:G>T-6:G>T	G/T	VU03	7938749	+	NA	NA	NA	NA	NA	NA	GG	GG	GG	GG	GG	GG	GG	GG	GG	GG	GG	GG	GG	GG	GG	GG	GG	GG	GG	GG	GG	GG	GG	GG	GG	GG	GG	GG	GG	GG	GG	GG	GG	GG	GG	GG	GG	GG	GG
14086144|F|0-9:A>T-9:A>T	A/T	VU03	7949222	+	NA	NA	NA	NA	NA	NA	AA	AA	AA	TT	AA	TT	TT	AA	AA	AA	AA	TT	AA	AA	TT	AA	AT	AA	TT	AA	AA	AA	AA	AA	AA	AA	AA	TT	TT	TT	AA	TT	TT	TT	AA	AA	AA	AA	AA
42215642|F|0-32:A>C-32:A>C	C/A	VU03	8098065	+	NA	NA	NA	NA	NA	NA	CC	CC	CC	CC	CC	CC	CC	NN	CC	CC	CC	CC	CC	CC	NN	CC	CC	CC	CC	CC	CC	CC	CC	NN	CC	CC	CC	NN	CC	CC	CC	CC	CC	NN	CC	CC	CC	CC	CC
42215838|F|0-23:T>C-23:T>C	C/T	VU03	8103147	+	NA	NA	NA	NA	NA	NA	CC	CC	CC	CC	CC	CC	CC	CC	CC	CC	CC	CC	CC	CC	TT	CC	CT	CC	CC	CC	CC	CC	CC	CC	CC	CC	CC	CC	CC	CC	CC	CC	CC	CC	CC	CC	CC	CC	CC
14081542|F|0-10:T>C-10:T>C	T/C	VU03	8173197	+	NA	NA	NA	NA	NA	NA	TT	TT	CC	NN	TT	TT	NN	TT	TT	TT	CC	NN	TT	TT	CC	TT	CT	TT	NN	TT	CC	TT	TT	TT	TT	TT	TT	NN	NN	NN	TT	NN	NN	TT	TT	TT	CC	TT	TT
25353198|F|0-45:A>T-45:A>T	A/T	VU03	8247837	+	NA	NA	NA	NA	NA	NA	AA	AA	AA	TT	AA	AA	TT	AA	AA	TT	AA	TT	AA	TT	TT	TT	AT	AA	TT	AA	AA	TT	AA	AA	AA	AA	AA	TT	TT	AT	AA	TT	TT	AA	AA	AA	AA	AA	AA
28202958|F|0-22:C>T-22:C>T	C/T	VU03	8327976	+	NA	NA	NA	NA	NA	NA	CC	CC	CC	CT	CC	CC	TT	CC	CC	TT	CT	TT	CC	CC	TT	CC	CT	CC	TT	CC	CC	TT	CC	CC	CC	CC	CC	TT	TT	TT	CC	TT	TT	CC	CC	NN	CC	CC	CC
35153137|F|0-13:G>C-13:G>C	G/C	VU03	8334247	+	NA	NA	NA	NA	NA	NA	CC	CC	CC	GG	CC	CC	GG	CC	CC	GG	CC	GG	GG	NN	GG	CC	CC	CC	GG	CC	CC	GG	CC	CC	NN	CC	CC	NN	NN	GG	CC	GG	GG	NN	GG	NN	NN	NN	CC
28203173|F|0-31:G>C-31:G>C	G	VU03	8515432	+	NA	NA	NA	NA	NA	NA	GG	GG	GG	GG	GG	GG	GG	GG	GG	GG	GG	GG	GG	GG	GG	GG	GG	GG	GG	GG	GG	GG	GG	GG	GG	GG	GG	GG	GG	GG	GG	GG	GG	GG	GG	GG	GG	GG	GG
14082189|F|0-53:C>T-53:C>T	C/T	VU03	8522637	+	NA	NA	NA	NA	NA	NA	CC	CC	CC	CC	CC	CC	CC	CC	CC	CC	CC	CC	CC	CC	CC	TT	CC	NN	CC	CC	CC	CT	CC	CC	CC	CC	CC	CC	CC	CC	CC	CC	CC	CC	CC	CC	CC	CC	CC
14076614|F|0-9:A>C-9:A>C	A	VU03	8600703	+	NA	NA	NA	NA	NA	NA	AA	AA	AA	AA	AA	AA	AA	AA	AA	AA	AA	AA	AA	AA	AA	AA	AA	AA	AA	AA	AA	AA	AA	AA	AA	AA	AA	AA	AA	AA	AA	AA	AA	AA	AA	AA	AA	AA	AA
14086056|F|0-33:G>C-33:G>C	C/G	VU03	8618274	+	NA	NA	NA	NA	NA	NA	GG	CC	CC	CC	CC	GG	CC	GG	GG	CC	CC	CC	CC	CC	CC	CC	GC	GC	CC	CC	CC	CC	CC	GC	CC	CC	GC	CC	CC	CC	GG	CC	NN	GG	CC	GG	CC	CC	GG
35153163|F|0-30:T>C-30:T>C	T/C	VU03	8712320	+	NA	NA	NA	NA	NA	NA	TT	TT	TT	TT	TT	TT	TT	TT	TT	TT	TT	TT	TT	CT	TT	CC	TT	TT	TT	TT	TT	CC	TT	TT	TT	TT	TT	TT	TT	TT	TT	TT	TT	TT	TT	NN	TT	TT	TT
14054982|F|0-22:T>G-22:T>G	T	VU03	8722697	+	NA	NA	NA	NA	NA	NA	TT	TT	TT	TT	TT	TT	TT	TT	TT	TT	TT	TT	TT	TT	TT	TT	TT	TT	TT	TT	TT	TT	TT	TT	TT	TT	TT	TT	TT	TT	TT	TT	TT	TT	TT	TT	TT	TT	TT
35154791|F|0-39:T>C-39:T>C	C/T	VU03	8755215	+	NA	NA	NA	NA	NA	NA	NN	CC	TT	CC	CC	NN	CC	NN	NN	TT	TT	TT	TT	TT	CC	TT	CC	NN	CC	TT	TT	TT	CC	CC	CC	CC	CC	CC	CC	CC	NN	CC	TT	NN	CC	NN	TT	CC	NN
14076676|F|0-54:T>C-54:T>C	T/C	VU03	8759423	+	NA	NA	NA	NA	NA	NA	TT	TT	CC	TT	TT	TT	TT	TT	TT	CC	CC	CC	CC	CC	TT	CC	TT	TT	TT	CC	CC	NN	TT	TT	TT	TT	TT	TT	NN	TT	TT	TT	CC	TT	TT	TT	CC	TT	TT
14085690|F|0-36:T>C-36:T>C	T/C	VU03	8773448	+	NA	NA	NA	NA	NA	NA	TT	TT	CC	TT	TT	TT	TT	TT	TT	CC	CC	CC	CC	CC	TT	CC	TT	TT	TT	CC	CC	CC	TT	TT	TT	TT	TT	TT	TT	TT	TT	TT	CC	NN	TT	TT	CC	TT	TT
14086326|F|0-26:G>T-26:G>T	T/G	VU03	8882515	+	NA	NA	NA	NA	NA	NA	GG	NN	TT	TT	NN	GG	TT	GG	GG	TT	TT	TT	TT	TT	TT	TT	GT	GG	TT	TT	TT	TT	NN	TT	GG	NN	GG	TT	TT	TT	GT	TT	TT	TT	NN	GG	TT	NN	GG
14086327|F|0-35:C>T-35:C>T	T/C	VU03	8882515	+	NA	NA	NA	NA	NA	NA	NN	CC	TT	TT	CC	NN	TT	NN	NN	TT	TT	TT	TT	TT	TT	TT	TT	NN	TT	TT	TT	TT	CC	CC	NN	CC	CC	TT	TT	TT	TT	TT	TT	TT	CC	NN	TT	CC	NN
14081976|F|0-65:T>C-65:T>C	C/T	VU03	8890667	+	NA	NA	NA	NA	NA	NA	CC	CC	CC	CC	CC	CC	CC	CC	CC	CC	CC	CC	CC	CC	CC	CC	CC	CC	CC	CC	CC	CC	CC	CC	CC	CC	CC	CC	CC	CC	CC	CC	CC	TT	CC	CC	CC	CC	CC
14084263|F|0-29:G>C-29:G>C	C/G	VU03	8906153	+	NA	NA	NA	NA	NA	NA	GG	GG	CC	CC	GG	GG	CC	GG	GG	CC	CC	CC	CC	CC	CC	CC	GC	GG	CC	CC	CC	CC	GG	GG	GG	GG	GG	CC	CC	CC	GC	CC	CC	GG	GG	GG	CC	GG	GG
14074164|F|0-20:C>G-20:C>G	C/G	VU03	9041735	+	NA	NA	NA	NA	NA	NA	CC	NN	CC	GG	CC	CC	GC	CC	CC	CC	CC	CC	CC	CC	CC	CC	CC	NN	GG	CC	CC	CC	CC	CC	NN	CC	CC	GG	CC	GC	NN	CC	CC	CC	CC	NN	CC	CC	NN
14074164|F|0-45:T>C-45:T>C	T/C	VU03	9041735	+	NA	NA	NA	NA	NA	NA	TT	CC	TT	NN	TT	TT	TT	TT	TT	TT	TT	TT	TT	TT	TT	TT	TT	CC	NN	TT	TT	TT	TT	CT	CC	TT	CT	NN	TT	TT	CC	TT	TT	TT	TT	CC	TT	TT	CC
35152835|F|0-30:C>T-30:C>T	T/C	VU03	9075833	+	NA	NA	NA	NA	NA	NA	TT	TT	TT	CC	TT	TT	CC	TT	TT	TT	TT	TT	TT	TT	TT	TT	TT	NN	CC	TT	TT	TT	TT	NN	NN	TT	TT	CC	TT	CC	NN	TT	TT	TT	TT	NN	TT	TT	NN
35153240|F|0-62:G>A-62:G>A	A/G	VU03	9122572	+	NA	NA	NA	NA	NA	NA	AA	AA	AA	GG	AA	AA	GG	AA	AA	AA	AA	AA	AA	AA	AA	AA	AA	GG	GG	AA	AA	AA	AA	AG	GG	NN	AA	GG	GG	GG	GG	AA	AA	AA	GG	GG	AA	AA	GG
35153908|F|0-36:A>G-36:A>G	G/A	VU03	9462107	+	NA	NA	NA	NA	NA	NA	GG	GG	GG	GG	GG	GG	GG	GG	GG	GG	GG	GG	GG	GG	GG	GG	GG	AA	GG	GG	GG	GG	GG	AG	AA	GG	AG	GG	GG	GG	AA	NN	GG	GG	AA	AA	GG	NN	AA
14085486|F|0-42:T>G-42:T>G	T/G	VU03	9481788	+	NA	NA	NA	NA	NA	NA	TT	TT	TT	TT	TT	TT	TT	TT	TT	TT	TT	TT	TT	TT	TT	TT	TT	GG	TT	TT	TT	TT	TT	GT	GG	TT	GT	TT	TT	TT	GT	TT	TT	TT	GG	GG	TT	TT	GG
14073391|F|0-15:A>G-15:A>G	G/A	VU03	9491426	+	NA	NA	NA	NA	NA	NA	GG	GG	GG	GG	GG	GG	GG	GG	GG	GG	GG	GG	GG	GG	GG	GG	GG	AA	GG	GG	GG	GG	GG	AG	AA	GG	AG	GG	GG	GG	AG	GG	GG	GG	AA	AA	GG	GG	AA
25364169|F|0-63:A>G-63:A>G	G/A	VU03	9510691	+	NA	NA	NA	NA	NA	NA	GG	GG	GG	GG	GG	GG	GG	GG	GG	GG	GG	GG	GG	GG	GG	GG	GG	GG	GG	GG	GG	GG	GG	GG	GG	GG	GG	GG	GG	GG	GG	GG	GG	GG	GG	GG	GG	GG	GG
25362891|F|0-32:G>A-32:G>A	A/G	VU03	9790966	+	NA	NA	NA	NA	NA	NA	AA	AA	GG	AA	AA	NN	AA	NN	AA	AA	AA	NN	AA	GG	GG	AA	AA	AA	AA	GG	GG	GG	GG	AA	AA	NN	AA	AA	NN	AA	AA	AA	NN	AA	AA	NN	GG	NN	AA
25365169|F|0-33:C>A-33:C>A	A/C	VU03	9792471	+	NA	NA	NA	NA	NA	NA	AA	AA	CC	AA	AA	AA	AA	AA	AA	AA	AA	AA	AA	CC	CC	AA	AA	AA	AA	CC	CC	CC	CC	AA	AA	AA	AA	AA	AA	AA	AA	AA	AA	AA	AA	AA	CC	AA	AA
25366734|F|0-20:G>T-20:G>T	G/T	VU03	9896264	+	NA	NA	NA	NA	NA	NA	GG	GG	GG	GG	GG	GG	GG	GG	GG	GG	GG	GG	GG	GG	GG	GG	GG	GG	GG	GG	GG	GG	GG	GG	GG	GG	GG	GG	GG	GG	GG	GG	GG	GG	GG	GG	GG	GG	GG
25366212|F|0-33:C>T-33:C>T	C/T	VU03	10091303	+	NA	NA	NA	NA	NA	NA	CC	CC	CC	CC	CC	CC	CC	CC	CC	CC	CC	CC	CC	CC	CC	CC	CT	CC	CC	CC	CC	CC	CC	CC	CC	CC	CC	CC	CC	CC	CC	CC	CC	CC	CC	CC	CC	CC	CC
25366212|F|0-38:T>C-38:T>C	T/C	VU03	10091303	+	NA	NA	NA	NA	NA	NA	TT	TT	TT	TT	TT	TT	TT	TT	TT	TT	TT	TT	TT	TT	TT	TT	TT	TT	TT	TT	TT	TT	TT	TT	CT	TT	TT	TT	TT	TT	TT	TT	TT	TT	TT	TT	TT	TT	TT
25352866|F|0-59:G>C-59:G>C	G/C	VU03	10111969	+	NA	NA	NA	NA	NA	NA	GG	GG	GG	GG	GG	GG	GG	GG	GG	GG	GG	GG	GG	GG	GG	GG	GG	GG	GG	GG	GG	GG	CC	GG	GG	GG	GG	GG	GG	GG	GG	GG	GG	GG	GG	GG	GG	GG	GG
14076626|F|0-39:C>T-39:C>T	T/C	VU03	10405894	+	NA	NA	NA	NA	NA	NA	CC	TT	TT	TT	CC	TT	TT	CC	CT	TT	TT	CC	TT	TT	TT	TT	CT	TT	TT	TT	TT	TT	TT	TT	CC	CC	TT	TT	TT	TT	CC	TT	CC	CC	CC	NN	TT	TT	CC
14073808|F|0-66:C>A-66:C>A	A/C	VU03	10409575	+	NA	NA	NA	NA	NA	NA	CC	AA	AA	AA	CC	AA	AA	CC	CC	AA	AA	CC	AA	AA	AA	AA	AC	AA	AA	AA	AA	AA	AA	AC	CC	CC	AC	AA	AA	AA	CC	AA	CC	CC	CC	CC	AA	AA	CC
14082393|F|0-55:G>T-55:G>T	G/T	VU03	10410077	+	NA	NA	NA	NA	NA	NA	TT	GG	GG	GG	TT	GG	GG	TT	TT	GG	GG	TT	GG	GG	GG	GG	GT	GG	GG	GG	GG	GG	GG	GT	TT	TT	GG	GG	GG	GG	TT	GG	TT	TT	TT	TT	GG	GG	GT
14084218|F|0-23:A>C-23:A>C	C/A	VU03	10451223	+	NA	NA	NA	NA	NA	NA	CC	CC	CC	CC	AA	AA	CC	CC	CC	CC	CC	CC	CC	CC	CC	CC	CC	CC	CC	CC	CC	CC	CC	CC	CC	CC	CC	CC	CC	CC	CC	CC	CC	CC	CC	CC	CC	CC	CC
25363364|F|0-37:G>A-37:G>A	A	VU03	10458421	+	NA	NA	NA	NA	NA	NA	AA	AA	AA	AA	NN	NN	AA	AA	AA	AA	AA	AA	AA	AA	AA	AA	AA	AA	AA	AA	AA	AA	AA	AA	AA	AA	AA	AA	AA	AA	AA	AA	AA	AA	AA	NN	AA	AA	AA
25363365|F|0-46:T>G-46:T>G	T/G	VU03	10458421	+	NA	NA	NA	NA	NA	NA	TT	TT	TT	TT	GG	GG	TT	TT	TT	TT	TT	TT	TT	TT	TT	TT	TT	TT	TT	TT	TT	TT	TT	TT	TT	TT	TT	TT	TT	TT	TT	TT	TT	TT	TT	NN	TT	TT	TT
35154685|F|0-17:A>C-17:A>C	A/C	VU03	10463205	+	NA	NA	NA	NA	NA	NA	AA	AA	AA	AA	CC	CC	AA	AA	AC	AA	AA	AA	AA	AA	AA	AA	AA	AA	AA	AA	AA	AA	AA	AA	AA	AA	AA	AA	AA	AA	AA	AA	AA	AA	AA	AA	AA	AA	AA
35154685|F|0-67:A>T-67:A>T	A	VU03	10463205	+	NA	NA	NA	NA	NA	NA	AA	AA	AA	AA	NN	NN	AA	AA	AA	AA	AA	AA	AA	AA	AA	AA	AA	AA	AA	AA	AA	AA	AA	AA	AA	AA	AA	AA	AA	AA	AA	AA	AA	AA	AA	AA	AA	AA	AA
35152894|F|0-48:T>C-48:T>C	T/C	VU03	10495366	+	NA	NA	NA	NA	NA	NA	TT	TT	TT	TT	CC	CC	TT	NN	TT	TT	TT	TT	TT	TT	TT	TT	TT	TT	TT	TT	TT	TT	TT	TT	TT	TT	TT	TT	TT	TT	TT	TT	TT	TT	TT	TT	TT	TT	TT
25354660|F|0-19:A>C-19:A>C	A/C	VU03	10529448	+	NA	NA	NA	NA	NA	NA	AA	AA	AA	AA	CC	CC	AA	AA	AA	AA	AA	AA	AA	AA	AA	AA	AA	AA	AA	AA	AA	AA	AA	AA	AA	AA	AA	AA	AA	AA	AA	AA	AA	AA	AA	AA	AA	AA	AA
25365868|F|0-57:A>G-57:A>G	A	VU03	10543387	+	NA	NA	NA	NA	NA	NA	AA	AA	AA	AA	AA	AA	AA	AA	AA	AA	AA	AA	AA	AA	AA	AA	AA	AA	AA	AA	AA	AA	AA	AA	AA	AA	AA	AA	AA	AA	AA	AA	AA	AA	AA	AA	AA	AA	AA
25354359|F|0-47:C>A-47:C>A	C/A	VU03	10608502	+	NA	NA	NA	NA	NA	NA	CC	AA	CC	CC	AA	AA	CC	CC	CC	CC	CC	CC	CC	AA	CC	CC	AC	AA	CC	CC	CC	CC	CC	CC	CC	CC	AC	CC	CC	CC	CC	CC	CC	CC	CC	CC	CC	CC	CC
35153917|F|0-7:G>C-7:G>C	G/C	VU03	10610869	+	NA	NA	NA	NA	NA	NA	GG	GG	CC	CC	GG	GG	CC	GG	GG	CC	GG	GG	CC	GG	CC	CC	GG	GG	NN	GG	CC	GG	CC	NN	GG	GG	GG	CC	CC	CC	GG	CC	NN	GG	GG	NN	CC	GG	GG
25366165|F|0-9:T>C-9:T>C	T	VU03	10673502	+	NA	NA	NA	NA	NA	NA	TT	TT	TT	TT	TT	TT	TT	TT	TT	TT	TT	TT	TT	TT	TT	TT	TT	TT	TT	TT	TT	TT	TT	TT	TT	TT	TT	TT	TT	TT	TT	TT	TT	TT	TT	TT	TT	TT	TT
14079227|F|0-32:T>C-32:T>C	T/C	VU03	10673543	+	NA	NA	NA	NA	NA	NA	CC	TT	TT	TT	TT	TT	TT	TT	TT	TT	CC	TT	TT	TT	TT	TT	CT	TT	TT	CC	TT	CC	TT	CC	CC	CC	CT	TT	TT	CC	CC	CC	TT	TT	TT	CC	TT	CC	TT
14075631|F|0-38:A>C-38:A>C	A/C	VU03	10753697	+	NA	NA	NA	NA	NA	NA	CC	CC	AA	NN	CC	AA	NN	CC	AA	AA	AA	CC	AA	NN	AA	AA	AA	AA	NN	AA	AA	AA	CC	CC	CC	CC	AC	NN	NN	AA	CC	AA	CC	CC	AA	AA	AA	CC	CC
42215533|F|0-55:C>A-55:C>A	C	VU03	10770537	+	NA	NA	NA	NA	NA	NA	CC	CC	CC	CC	CC	CC	CC	CC	NN	CC	CC	CC	CC	CC	CC	CC	CC	CC	CC	CC	CC	CC	CC	CC	CC	CC	CC	CC	CC	CC	CC	NN	CC	CC	CC	NN	CC	NN	CC
14087178|F|0-35:A>G-35:A>G	G/A	VU03	10772359	+	NA	NA	NA	NA	NA	NA	AA	GG	GG	GG	GG	AA	GG	GG	AA	GG	GG	GG	GG	GG	GG	GG	AG	AA	GG	GG	GG	GG	GG	AG	AA	GG	AG	GG	GG	GG	AA	GG	GG	GG	AA	AA	GG	GG	GG
14073863|F|0-29:A>G-29:A>G	A/G	VU03	10772795	+	NA	NA	NA	NA	NA	NA	GG	AA	AA	AA	AA	GG	AA	AA	GG	AA	AA	AA	AA	AA	AA	AA	AG	GG	AA	AA	AA	AA	AA	AG	GG	AA	AG	AA	AA	AA	GG	AA	AA	AA	GG	GG	AA	AA	AA
14083610|F|0-28:G>A-28:G>A	G/A	VU03	10777634	+	NA	NA	NA	NA	NA	NA	NN	AA	GG	GG	AA	NN	GG	AA	NN	GG	GG	GG	GG	GG	GG	GG	GG	NN	GG	GG	GG	AG	AA	AA	NN	AA	AA	GG	GG	GG	NN	GG	GG	AA	NN	NN	GG	AA	AG
14073899|F|0-10:G>A-10:G>A	G	VU03	10846588	+	NA	NA	NA	NA	NA	NA	GG	GG	GG	GG	GG	GG	GG	GG	GG	GG	GG	GG	GG	GG	GG	GG	GG	GG	GG	GG	GG	GG	GG	GG	GG	GG	GG	GG	GG	GG	GG	GG	GG	GG	GG	GG	GG	GG	GG
14073899|F|0-17:C>A-17:C>A	C/A	VU03	10846588	+	NA	NA	NA	NA	NA	NA	CC	CC	CC	CC	CC	AC	CC	CC	AC	CC	CC	CC	CC	CC	CC	CC	AC	AC	CC	CC	CC	CC	CC	CC	CC	CC	AC	CC	CC	CC	CC	CC	CC	CC	AC	CC	CC	CC	CC
25364127|F|0-21:A>G-21:A>G	A/G	VU03	10960521	+	NA	NA	NA	NA	NA	NA	AA	GG	AA	AA	GG	AA	AA	AA	AA	AA	AA	AA	AA	AA	AA	AA	AG	AA	AG	AA	AA	AA	AA	AA	AA	AA	AA	AA	AA	AA	AA	AA	AA	AA	AA	AA	AA	AA	AA
35153444|F|0-47:A>G-47:A>G	G/A	VU03	11162766	+	NA	NA	NA	NA	NA	NA	AA	GG	GG	GG	AA	AA	GG	AA	AG	GG	GG	GG	GG	GG	GG	GG	AG	AA	GG	GG	GG	GG	GG	AA	AA	GG	AA	GG	GG	GG	NN	GG	NN	AA	AA	AA	GG	GG	AA
14074460|F|0-59:T>A-59:T>A	A/T	VU03	11207478	+	NA	NA	NA	NA	NA	NA	TT	NN	AA	AA	AA	TT	AA	TT	AA	AA	AA	AA	AA	AA	AA	AA	AT	TT	AA	AA	AA	NN	AA	TT	TT	AA	TT	NN	AA	AA	TT	NN	NN	NN	TT	TT	AA	AA	TT
14075861|F|0-21:C>T-21:C>T	T/C	VU03	11207544	+	NA	NA	NA	NA	NA	NA	CC	TT	TT	TT	TT	CC	TT	CC	TT	TT	TT	TT	TT	TT	TT	TT	CT	CC	TT	TT	TT	TT	TT	CC	CC	TT	CC	TT	TT	TT	CC	TT	TT	NN	CC	CC	TT	TT	CC
14074413|F|0-25:C>T-25:C>T	C/T	VU03	11241584	+	NA	NA	NA	NA	NA	NA	CC	TT	CC	CC	TT	CC	CT	CC	TT	CC	CC	CC	CC	CC	CT	CC	CT	CC	CC	CC	CC	CT	TT	CC	CC	TT	CC	CC	CC	CC	CC	TT	CC	CC	CC	NN	CC	TT	CC
14077354|F|0-63:C>T-63:C>T	T/C	VU03	11293039	+	NA	NA	NA	NA	NA	NA	CC	TT	TT	TT	TT	CC	TT	CC	TT	TT	TT	TT	TT	TT	TT	TT	CT	CC	TT	TT	TT	TT	CC	CC	CC	TT	CC	TT	TT	TT	CC	TT	TT	CC	CC	CC	TT	TT	CC
14074015|F|0-37:A>T-37:A>T	T/A	VU03	11329019	+	NA	NA	NA	NA	NA	NA	AA	TT	TT	TT	TT	AA	TT	AA	TT	TT	TT	TT	TT	TT	TT	TT	AT	AA	TT	TT	TT	TT	AA	AT	AA	TT	AA	TT	TT	TT	AA	NN	TT	AA	AA	AA	TT	TT	AA
14076766|F|0-56:C>A-56:C>A	A/C	VU03	11351670	+	NA	NA	NA	NA	NA	NA	CC	AA	AA	AA	CC	CC	AA	CC	CC	CC	AA	AC	AA	AA	AA	AA	CC	CC	AA	AA	AA	AA	CC	CC	CC	CC	CC	AA	CC	AA	CC	CC	AA	CC	CC	CC	AA	CC	CC
14078992|F|0-16:T>A-16:T>A	A/T	VU03	11358625	+	NA	NA	NA	NA	NA	NA	TT	AA	AA	AA	TT	TT	AA	TT	AA	AA	AA	AA	AA	AA	AA	AA	AT	TT	AA	AA	AA	AA	TT	AT	TT	AA	TT	AA	AA	AA	TT	AA	AA	TT	TT	TT	AA	AA	TT
14086141|F|0-5:G>A-5:G>A	A/G	VU03	11375319	+	NA	NA	NA	NA	NA	NA	GG	AA	AA	AA	GG	GG	AA	GG	AA	AA	AA	AA	AA	AA	AA	AA	AG	AG	AA	AA	AA	AA	GG	AG	GG	AA	GG	AA	AA	AA	GG	AA	AA	GG	GG	GG	AA	AA	GG
14083058|F|0-64:G>T-64:G>T	G/T	VU03	11411794	+	NA	NA	NA	NA	NA	NA	TT	GG	GG	GG	TT	TT	GG	TT	GG	GG	GG	GG	GG	GG	GG	GG	GT	TT	GG	GG	GG	GG	TT	GT	TT	GG	TT	GG	GG	GG	GG	GG	GG	GG	TT	TT	GG	GG	TT
14075372|F|0-51:A>C-51:A>C	C/A	VU03	11411860	+	NA	NA	NA	NA	NA	NA	CC	AA	CC	AA	CC	CC	AA	CC	CC	CC	AA	AA	AA	AA	AA	AA	CC	CC	AA	AA	CC	AC	CC	CC	CC	CC	CC	AA	CC	AA	AA	CC	AA	NN	CC	CC	CC	CC	CC
14055768|F|0-47:G>T-47:G>T	G/T	VU03	11447831	+	NA	NA	NA	NA	NA	NA	GG	GG	GG	GG	GG	GG	GG	GG	GG	GG	GG	GG	GG	GG	GG	GG	GG	GG	GG	GG	GG	GG	GG	GG	GG	GG	GG	GG	GG	GG	GG	GG	GG	TT	GG	NN	GG	GG	GG
14082690|F|0-55:A>T-55:A>T	T/A	VU03	11450304	+	NA	NA	NA	NA	NA	NA	TT	TT	TT	TT	TT	TT	TT	TT	TT	TT	AA	AA	AA	AA	AA	AA	TT	TT	TT	AA	TT	AA	TT	TT	TT	TT	TT	TT	TT	TT	TT	TT	AA	TT	TT	TT	TT	TT	TT
35154974|F|0-38:T>C-38:T>C	T/C	VU03	11456628	+	NA	NA	NA	NA	NA	NA	TT	TT	TT	TT	TT	TT	TT	TT	TT	TT	CC	NN	CC	CC	CC	CC	TT	CT	TT	CT	TT	TT	TT	TT	TT	NN	TT	NN	TT	TT	TT	NN	NN	CC	TT	TT	TT	TT	TT
25360367|F|0-34:A>T-34:A>T	A/T	VU03	11470367	+	NA	NA	NA	NA	NA	NA	AA	AA	AA	AA	AA	AA	AA	AA	AA	AA	TT	AA	AA	TT	AA	AA	AA	AA	AA	TT	AA	AT	AA	AA	AA	AA	AA	AA	AA	AA	AA	AA	AA	NN	AA	AA	AA	AA	AA
14077224|F|0-14:A>G-14:A>G	G/A	VU03	11573587	+	NA	NA	NA	NA	NA	NA	AA	GG	GG	GG	AA	AA	GG	AA	GG	GG	GG	GG	GG	GG	GG	GG	AG	AA	GG	GG	GG	GG	AA	AG	AA	GG	AA	GG	GG	GG	AA	GG	GG	AA	AA	AA	GG	GG	AA
14074081|F|0-32:A>C-32:A>C	A/C	VU03	11573948	+	NA	NA	NA	NA	NA	NA	CC	AA	AA	AA	CC	CC	AA	CC	AA	AA	AA	AA	AA	AA	AA	AA	AC	NN	AA	AA	AA	AA	CC	AC	CC	AA	CC	AA	AA	AA	CC	AA	AA	NN	CC	NN	AA	AA	CC
14076174|F|0-24:A>C-24:A>C	A/C	VU03	11675479	+	NA	NA	NA	NA	NA	NA	CC	AA	AA	AA	CC	CC	AA	CC	CC	AA	AA	AA	AA	AA	AA	AA	AC	CC	AA	AA	AA	AA	CC	AA	CC	AA	CC	AA	AA	AA	CC	AA	AA	CC	CC	NN	AA	AA	CC
14080097|F|0-31:A>C-31:A>C	C/A	VU03	11716893	+	NA	NA	NA	NA	NA	NA	AA	AA	CC	CC	AA	AA	CC	AA	AA	CC	CC	CC	CC	CC	CC	CC	AC	AA	CC	CC	CC	CC	CC	AC	AA	CC	AA	CC	CC	CC	AA	CC	CC	AA	AA	AA	CC	CC	AA
14074119|F|0-47:C>T-47:C>T	T/C	VU03	11765260	+	NA	NA	NA	NA	NA	NA	CC	CC	TT	TT	CC	CC	TT	CC	CC	TT	TT	TT	TT	TT	TT	TT	CT	CC	TT	TT	TT	TT	TT	CT	CC	TT	CC	TT	TT	TT	CC	CT	TT	NN	CC	CC	TT	TT	CC
14083779|F|0-5:C>T-5:C>T	T/C	VU03	11800429	+	NA	NA	NA	NA	NA	NA	CC	CC	TT	TT	CC	CC	TT	CC	CC	TT	TT	TT	TT	TT	TT	TT	CT	CC	TT	TT	TT	TT	TT	CT	CC	TT	CC	TT	TT	TT	CC	TT	TT	CC	CC	CC	TT	TT	CC
14086086|F|0-44:C>T-44:C>T	T/C	VU03	11805787	+	NA	NA	NA	NA	NA	NA	CC	CC	TT	TT	CC	CC	TT	CC	CC	TT	TT	TT	TT	NN	TT	TT	CT	CC	TT	TT	TT	TT	TT	TT	CC	TT	CC	TT	TT	TT	CC	TT	TT	CC	CC	CC	TT	TT	CC
14086650|F|0-45:A>G-45:A>G	G/A	VU03	11877272	+	NA	NA	NA	NA	NA	NA	AA	AA	GG	GG	AA	AA	GG	AA	AA	GG	GG	GG	GG	GG	GG	GG	AG	AA	GG	GG	GG	GG	GG	AG	AA	GG	AA	GG	GG	GG	AG	GG	GG	AA	AA	AA	GG	GG	AA
14079361|F|0-40:T>C-40:T>C	C/T	VU03	11941428	+	NA	NA	NA	NA	NA	NA	TT	TT	CC	CC	TT	TT	CC	TT	TT	CC	CC	CC	CC	CC	CC	CC	CT	TT	CC	CC	CC	CC	CC	CT	TT	TT	TT	CC	CC	TT	TT	CC	CT	TT	TT	TT	CC	CT	TT
25365989|F|0-50:C>T-50:C>T	C/T	VU03	12265760	+	NA	NA	NA	NA	NA	NA	CC	CC	TT	CC	CC	CC	CC	CC	CC	TT	TT	CC	TT	TT	CC	TT	CC	CC	CC	TT	TT	TT	CC	CC	CC	CC	CC	CC	CC	CC	CC	CC	CC	CC	CC	CC	TT	CC	CC
14086342|F|0-6:G>A-6:G>A	A/G	VU03	12303940	+	NA	NA	NA	NA	NA	NA	NN	GG	AA	AA	AA	GG	AA	GG	GG	AA	AA	AA	AA	AA	AA	AA	AA	GG	AA	AA	AA	AA	AA	GG	GG	AA	GG	AA	AA	AA	GG	GG	AA	GG	GG	NN	AA	AA	GG
14078200|F|0-21:A>C-21:A>C	A/C	VU03	12339449	+	NA	NA	NA	NA	NA	NA	NN	CC	AA	AA	AA	CC	AA	CC	CC	AA	AA	AA	AA	AA	AA	AA	AA	CC	AA	AA	AA	AA	AA	CC	CC	CC	CC	AA	AA	AA	CC	CC	AA	CC	CC	NN	AA	CC	CC
25355633|F|0-59:C>T-59:C>T	C/T	VU03	12358500	+	NA	NA	NA	NA	NA	NA	TT	CC	CC	CC	CC	CC	CC	CC	CC	CC	CC	CC	CC	CC	CC	CC	CC	CC	CC	CC	CC	CC	CC	CC	CC	CC	CT	CC	CC	CC	CC	CC	CC	CC	CC	TT	CC	CC	CC
14082492|F|0-35:C>T-35:C>T	C/T	VU03	12364808	+	NA	NA	NA	NA	NA	NA	TT	CC	CC	CC	CC	CC	CC	CC	CC	CC	CC	CC	CC	CC	CC	CC	CC	CC	CC	CC	CC	CC	CC	CC	CC	CC	CT	CC	CC	CC	CC	CC	CC	CC	CC	TT	CC	CC	CC
14086009|F|0-29:C>T-29:C>T	C/T	VU03	12435158	+	NA	NA	NA	NA	NA	NA	CC	CC	CC	CC	CC	CC	CC	CC	CC	CC	CC	CC	CC	CC	CC	CC	CC	CC	CC	CC	CC	CC	CC	CC	CC	CC	CC	CC	CC	CC	CC	CC	CC	CC	CC	CC	CC	CC	CC
14086009|F|0-54:G>A-54:G>A	A/G	VU03	12435158	+	NA	NA	NA	NA	NA	NA	AA	AA	AA	AA	AA	AA	AA	AA	AA	AA	AA	AA	AA	AA	AA	AA	AA	AA	AA	AA	AA	AA	AA	AA	AA	AA	AA	AA	AA	AA	AA	AA	AA	AA	AA	AA	AA	AA	AA
14085271|F|0-64:T>C-64:T>C	T/C	VU03	12438232	+	NA	NA	NA	NA	NA	NA	CC	TT	TT	TT	TT	TT	TT	TT	TT	TT	TT	TT	TT	TT	TT	TT	TT	TT	TT	TT	TT	TT	TT	TT	TT	TT	CT	TT	TT	TT	TT	TT	TT	TT	TT	TT	TT	TT	TT
14074521|F|0-24:A>G-24:A>G	A/G	VU03	12438309	+	NA	NA	NA	NA	NA	NA	GG	AA	AA	AA	AA	AA	AA	AA	AA	AA	AA	AA	AA	AA	AA	AA	AA	AA	AA	AA	AA	AA	AA	AA	AA	AA	AG	AA	AA	AA	AA	AA	AA	AA	AA	AA	AA	AA	AA
14077001|F|0-65:G>A-65:G>A	G/A	VU03	12452084	+	NA	NA	NA	NA	NA	NA	AA	GG	GG	GG	GG	GG	GG	GG	GG	GG	GG	GG	GG	GG	GG	GG	GG	GG	GG	GG	GG	GG	GG	GG	GG	GG	AG	GG	GG	GG	GG	GG	GG	GG	GG	GG	GG	GG	GG
14074116|F|0-38:T>A-38:T>A	T/A	VU03	12454177	+	NA	NA	NA	NA	NA	NA	AA	TT	TT	TT	TT	TT	TT	TT	TT	TT	TT	TT	TT	TT	TT	TT	TT	TT	TT	TT	TT	TT	TT	TT	TT	TT	AT	TT	TT	TT	TT	TT	TT	TT	TT	TT	TT	TT	TT
14083483|F|0-14:C>A-14:C>A	A/C	VU03	12496167	+	NA	NA	NA	NA	NA	NA	CC	CC	AA	AA	AA	CC	AA	CC	CC	AA	AA	AA	AA	AA	AA	AA	AA	CC	AA	AA	AA	AA	AA	AC	CC	AA	CC	AA	AA	AA	CC	AA	AA	CC	CC	AA	AA	AA	CC
14074646|F|0-6:C>T-6:C>T	C/T	VU03	12499389	+	NA	NA	NA	NA	NA	NA	TT	TT	CC	CC	CC	TT	CC	TT	TT	CC	CC	CC	CC	CC	CC	CC	CC	TT	CT	CC	CC	CC	CC	CT	TT	CC	TT	CC	CC	CC	TT	CC	CC	TT	TT	CC	CC	CC	TT
14076674|F|0-68:A>T-68:A>T	T/A	VU03	12626273	+	NA	NA	NA	NA	NA	NA	AA	AA	TT	TT	TT	AA	TT	AA	AA	TT	TT	TT	TT	TT	TT	TT	AT	AA	AT	TT	TT	TT	TT	AT	AA	NN	AA	TT	TT	TT	AA	TT	TT	AA	AA	NN	TT	TT	AA
14079219|F|0-19:G>T-19:G>T	T/G	VU03	12762393	+	NA	NA	NA	NA	NA	NA	TT	TT	TT	GG	GT	TT	GG	TT	TT	TT	TT	GG	TT	TT	TT	GG	GG	TT	GG	TT	TT	GT	GG	GT	TT	TT	TT	GG	GG	GG	TT	GG	GG	TT	TT	TT	TT	TT	TT
14074599|F|0-23:T>A-23:T>A	T/A	VU03	12763593	+	NA	NA	NA	NA	NA	NA	TT	TT	TT	AA	AA	TT	AA	TT	TT	TT	TT	AA	TT	TT	TT	AA	AT	TT	AT	TT	TT	TT	AA	AT	TT	TT	TT	AA	AA	AA	TT	AA	AA	TT	TT	TT	TT	TT	TT
35152744|F|0-61:T>G-61:T>G	G/T	VU03	12822172	+	NA	NA	NA	NA	NA	NA	TT	TT	GG	GG	GG	TT	GG	NN	TT	GG	GG	GG	GG	GG	GG	GG	GT	TT	GG	NN	GG	NN	GG	NN	TT	GG	TT	NN	GG	NN	NN	GG	GG	TT	TT	NN	NN	GG	TT
14086186|F|0-27:G>A-27:G>A	A/G	VU03	12826736	+	NA	NA	NA	NA	NA	NA	GG	GG	AA	AA	AA	GG	AA	GG	GG	AA	AA	AA	AA	AA	AA	AA	AG	GG	AA	AA	AA	AA	AA	AG	GG	AA	GG	AA	AA	AA	GG	AA	AA	GG	GG	GG	AA	AA	GG
14076312|F|0-32:C>T-32:C>T	T/C	VU03	12880422	+	NA	NA	NA	NA	NA	NA	CC	CC	TT	TT	TT	CC	TT	CC	CC	TT	TT	TT	TT	TT	TT	TT	CT	CC	TT	TT	TT	TT	TT	CT	CC	TT	CC	TT	TT	TT	CT	TT	TT	CC	CC	CC	TT	TT	CC
35154052|F|0-22:G>T-22:G>T	T/G	VU03	12906482	+	NA	NA	NA	NA	NA	NA	GG	GG	TT	TT	TT	GG	TT	GG	GG	TT	TT	TT	TT	TT	TT	TT	GT	GG	TT	TT	NN	NN	TT	GT	GG	TT	GG	TT	TT	TT	GG	NN	TT	GG	GG	NN	TT	TT	GG
14083844|F|0-5:T>C-5:T>C	C/T	VU03	13090917	+	NA	NA	NA	NA	NA	NA	TT	TT	CC	CC	CC	TT	CC	CC	TT	CC	CC	CC	CC	CC	CC	CC	CC	TT	CC	CC	CC	CC	CC	CC	CC	CC	CT	CC	CC	CC	TT	CC	CC	TT	CC	CC	CC	CC	TT
14074473|F|0-7:C>T-7:C>T	T/C	VU03	13096952	+	NA	NA	NA	NA	NA	NA	CC	CC	TT	TT	TT	CC	TT	TT	CC	TT	TT	TT	TT	TT	TT	TT	TT	CC	TT	TT	TT	TT	TT	TT	TT	TT	CT	TT	TT	TT	CC	TT	TT	CC	TT	TT	TT	TT	CC
14077023|F|0-54:A>G-54:A>G	A/G	VU03	13099605	+	NA	NA	NA	NA	NA	NA	AG	AA	AA	AA	AG	AG	AA	AG	AA	AA	AA	AA	AA	AA	AA	AA	AG	AG	AA	AA	AA	AG	AG	AG	AG	AG	AG	AA	AA	AA	AG	AA	AA	AG	AA	AG	AG	AG	AG
14075822|F|0-40:C>A-40:C>A	A/C	VU03	13108854	+	NA	NA	NA	NA	NA	NA	CC	CC	AA	AA	AA	CC	AA	AA	CC	AA	AA	AA	AA	AA	AA	AA	AA	CC	AA	AA	AA	AA	AA	AA	AA	AA	AC	AA	AA	AA	CC	AA	AA	CC	AA	NN	AA	AA	CC
14075354|F|0-21:T>C-21:T>C	T/C	VU03	13133745	+	NA	NA	NA	NA	NA	NA	CC	CC	TT	TT	TT	CC	TT	TT	CC	TT	TT	TT	TT	TT	TT	TT	TT	CC	TT	TT	TT	TT	TT	TT	TT	TT	CC	TT	TT	NN	CC	TT	TT	TT	TT	TT	TT	TT	CC
14082897|F|0-64:C>T-64:C>T	C/T	VU03	13148630	+	NA	NA	NA	NA	NA	NA	TT	TT	CC	CC	CC	TT	CC	CC	TT	CC	CC	CC	CC	CC	CC	CC	CC	TT	CC	CC	CC	CC	CC	CC	CC	CC	CT	CC	CC	CC	TT	CC	CC	CC	CC	CC	CC	CC	TT
35153125|F|0-56:A>G-56:A>G	A/G	VU03	13148982	+	NA	NA	NA	NA	NA	NA	GG	GG	AA	NN	AA	GG	AA	AA	GG	AA	AA	AA	AA	AA	AA	AA	AA	GG	GG	AA	AA	AA	AA	AA	AA	AA	GG	AA	NN	AA	GG	NN	AA	AA	AA	AA	AA	AA	GG
35153830|F|0-31:G>A-31:G>A	A/G	VU03	13385663	+	NA	NA	NA	NA	NA	NA	GG	GG	AA	AA	AA	AA	AA	AA	AA	AA	AA	AA	AA	NN	AA	AA	AG	AA	AA	AA	AA	AA	NN	AA	GG	NN	NN	NN	AA	AA	GG	AA	AA	GG	AA	NN	NN	AA	GG
14085200|F|0-23:T>C-23:T>C	T/C	VU03	13395655	+	NA	NA	NA	NA	NA	NA	CC	CC	TT	TT	TT	TT	TT	TT	TT	TT	TT	TT	TT	TT	TT	TT	CT	TT	CT	TT	TT	TT	TT	TT	CC	TT	CT	TT	TT	TT	CC	TT	TT	CC	TT	CC	TT	TT	CC
14063613|F|0-68:A>G-68:A>G	A/G	VU03	13398295	+	NA	NA	NA	NA	NA	NA	NN	NN	AA	AA	AA	AA	AA	AA	AA	AA	AA	AA	AA	AA	AA	AA	AA	AA	AA	AA	AA	AA	AA	AA	NN	AA	AA	AA	AA	AA	NN	AA	AA	NN	AA	NN	AA	AA	NN
14074146|F|0-23:C>T-23:C>T	T/C	VU03	13398361	+	NA	NA	NA	NA	NA	NA	CC	CC	TT	TT	TT	TT	TT	TT	TT	TT	TT	TT	TT	TT	TT	TT	CT	TT	TT	TT	TT	TT	TT	TT	CC	TT	CT	TT	TT	TT	CC	TT	CT	CC	TT	CC	TT	TT	CC
14063670|F|0-36:T>C-36:T>C	T/C	VU03	13409585	+	NA	NA	NA	NA	NA	NA	NN	NN	TT	TT	TT	TT	TT	TT	TT	TT	TT	TT	TT	TT	TT	TT	TT	TT	TT	TT	TT	TT	TT	TT	NN	TT	TT	TT	TT	TT	NN	TT	TT	NN	TT	NN	TT	TT	NN
35153870|F|0-16:G>C-16:G>C	G/C	VU03	13606486	+	NA	NA	NA	NA	NA	NA	CC	CC	GG	GG	GG	GG	GG	NN	GG	GG	GG	GG	NN	GG	GG	GG	GG	GG	GG	GG	GG	GG	GG	GG	CC	GG	NN	GG	GG	GG	GG	GG	GG	NN	GG	GG	GG	GG	GG
25363288|F|0-11:G>A-11:G>A	A/G	VU03	13617821	+	NA	NA	NA	NA	NA	NA	GG	NN	NN	AA	AA	AA	AA	AA	AA	NN	AA	AA	NN	AA	AA	AA	AA	NN	AA	AA	AA	AA	AA	NN	GG	AA	AA	NN	NN	AA	NN	AA	AA	AA	AA	NN	NN	NN	AA
35152750|F|0-9:T>C-9:T>C	T/C	VU03	13670000	+	NA	NA	NA	NA	NA	NA	CC	TT	TT	TT	TT	TT	TT	TT	TT	TT	NN	TT	TT	TT	TT	TT	TT	TT	TT	TT	TT	TT	NN	TT	CC	NN	CT	TT	TT	NN	TT	TT	NN	TT	TT	TT	NN	TT	TT
25355090|F|0-42:A>G-42:A>G	A/G	VU03	13786066	+	NA	NA	NA	NA	NA	NA	AA	AA	AA	AA	AA	AA	AA	AA	AA	AA	AA	AA	AA	AA	AA	AA	AA	AA	AA	AA	AA	AA	AA	AA	AA	AA	AA	AA	AA	AA	AA	AA	AA	AA	AA	NN	AA	AA	AA
35153220|F|0-17:G>C-17:G>C	C	VU03	13795628	+	NA	NA	NA	NA	NA	NA	CC	CC	CC	CC	CC	CC	CC	CC	CC	CC	CC	CC	CC	CC	CC	NN	CC	CC	CC	CC	CC	NN	CC	CC	CC	NN	CC	NN	CC	CC	CC	CC	CC	NN	CC	CC	CC	NN	CC
35153383|F|0-45:A>T-45:A>T	A/T	VU03	13795694	+	NA	NA	NA	NA	NA	NA	AA	AA	AA	AA	AA	AA	AA	AA	TT	AA	AA	AA	AA	AA	AA	AA	AA	AA	AA	AA	AA	NN	AA	AA	AA	AA	AA	AA	AA	AA	AA	AA	AA	AA	AA	AA	AA	NN	AA
35154582|F|0-26:T>C-26:T>C	T/C	VU03	13804141	+	NA	NA	NA	NA	NA	NA	TT	TT	TT	TT	TT	TT	TT	NN	CC	TT	TT	NN	TT	TT	TT	NN	TT	TT	TT	TT	TT	TT	NN	TT	TT	TT	TT	TT	TT	TT	TT	TT	TT	TT	TT	NN	TT	TT	TT
35154582|F|0-66:A>C-66:A>C	A/C	VU03	13804141	+	NA	NA	NA	NA	NA	NA	AA	AA	AA	AA	AA	AA	AA	NN	NN	AA	AA	NN	AA	AA	AA	NN	AC	AA	AA	AA	AA	AA	NN	AA	AA	AA	AA	AA	AA	AA	AA	AA	AA	AA	AA	NN	AA	AA	AA
35155359|F|0-13:C>A-13:C>A	A/C	VU03	14007562	+	NA	NA	NA	NA	NA	NA	AA	CC	AA	AA	AA	AA	AA	AA	AA	AA	AA	AA	AA	AA	AA	AA	AA	AA	AA	AA	AA	AA	AA	AA	AA	AA	AA	AA	AA	AA	AA	AA	AA	AA	AA	NN	AA	AA	AA
14087892|F|0-57:G>T-57:G>T	G/T	VU03	14027416	+	NA	NA	NA	NA	NA	NA	GG	TT	GG	GG	GG	GG	GG	GG	NN	GG	GG	GG	GG	GG	GG	GG	GG	GG	GG	GG	GG	GG	GG	GG	GG	GG	GG	GG	GG	GG	GG	GG	GG	GG	GG	GG	GG	GG	GG
14087892|F|0-5:G>A-5:G>A	G/A	VU03	14027416	+	NA	NA	NA	NA	NA	NA	GG	NN	GG	GG	GG	GG	GG	GG	NN	GG	GG	GG	GG	GG	GG	GG	GG	GG	AG	GG	GG	GG	GG	GG	GG	GG	GG	GG	GG	GG	GG	GG	GG	GG	GG	GG	GG	GG	GG
42216069|F|0-19:C>A-19:C>A	A/C	VU03	14140727	+	NA	NA	NA	NA	NA	NA	AA	NN	AA	AA	AA	AA	AA	AA	NN	AA	AA	AA	AA	AA	AA	AA	AA	AA	AC	AA	AA	AA	AA	AA	AA	AA	AA	AA	AA	AA	AA	AA	AA	AC	AA	AA	AA	AA	AA
14081925|F|0-12:G>T-12:G>T	G	VU03	14151911	+	NA	NA	NA	NA	NA	NA	GG	NN	GG	GG	GG	GG	GG	GG	NN	GG	GG	GG	GG	GG	GG	GG	GG	GG	GG	GG	GG	GG	GG	GG	GG	GG	GG	GG	GG	GG	GG	GG	GG	GG	GG	GG	GG	GG	GG
14081925|F|0-24:A>G-24:A>G	A/G	VU03	14151911	+	NA	NA	NA	NA	NA	NA	AA	NN	AA	AA	AA	AA	AA	AA	NN	AA	AA	AA	AA	AA	AA	AA	AA	AA	AA	AA	AA	AA	AA	AA	AA	AA	AA	AA	AA	AA	AA	AA	AA	AA	AA	AA	AA	AA	AA
14081925|F|0-31:A>G-31:A>G	A/G	VU03	14151911	+	NA	NA	NA	NA	NA	NA	AA	NN	AA	AA	AA	AA	AA	AA	NN	AA	AA	AA	AA	AA	AA	AA	AA	AA	AA	AA	AA	AA	AA	AA	AA	AA	AA	AG	AA	AA	AA	AA	AA	AA	AA	AA	AA	AA	AA
14086714|F|0-19:T>C-19:T>C	T/C	VU03	14158413	+	NA	NA	NA	NA	NA	NA	TT	NN	TT	TT	TT	TT	TT	TT	NN	TT	TT	TT	TT	TT	NN	TT	TT	TT	CT	TT	TT	TT	TT	TT	TT	TT	TT	TT	TT	TT	TT	NN	TT	TT	TT	NN	TT	TT	TT
14077004|F|0-19:C>T-19:C>T	C/T	VU03	14277880	+	NA	NA	NA	NA	NA	NA	CC	CC	CC	CC	CC	CC	CC	CC	CC	CC	CC	CC	CC	CC	CC	CC	CC	CC	CT	CC	CC	CC	CC	CC	CC	CC	CC	CC	CC	CC	CC	CC	CC	CT	CC	NN	CC	CC	CC
14085259|F|0-5:A>T-5:A>T	T/A	VU03	14355946	+	NA	NA	NA	NA	NA	NA	TT	AA	TT	TT	TT	TT	TT	TT	AA	TT	TT	TT	TT	TT	TT	TT	TT	TT	TT	TT	TT	TT	TT	TT	TT	TT	TT	TT	TT	TT	TT	TT	TT	AA	TT	TT	TT	TT	TT
14085260|F|0-42:C>A-42:C>A	C/A	VU03	14355946	+	NA	NA	NA	NA	NA	NA	CC	AA	CC	CC	CC	CC	CC	CC	AC	CC	CC	CC	CC	CC	CC	CC	CC	CC	CC	CC	CC	CC	CC	CC	CC	CC	CC	CC	CC	CC	CC	CC	CC	AC	CC	CC	CC	CC	CC
14085260|F|0-54:T>C-54:T>C	T/C	VU03	14355946	+	NA	NA	NA	NA	NA	NA	TT	CC	TT	TT	TT	TT	TT	TT	CT	TT	TT	TT	TT	TT	TT	TT	TT	TT	TT	TT	TT	TT	TT	TT	TT	TT	TT	TT	TT	TT	TT	TT	TT	TT	TT	TT	TT	TT	TT
35153600|F|0-45:T>C-45:T>C	C/T	VU03	14485905	+	NA	NA	NA	NA	NA	NA	CC	CC	CC	CC	TT	CC	CC	CC	CC	CC	CC	CC	CC	CC	CC	CC	CC	CC	CC	CC	CC	CC	CC	CC	CC	CC	CC	CC	CC	CC	NN	CC	CC	CC	CC	CC	CC	CC	CC
14074580|F|0-9:G>T-9:G>T	T/G	VU03	14551189	+	NA	NA	NA	NA	NA	NA	GG	GG	TT	TT	GG	GG	TT	GG	GG	TT	TT	TT	TT	TT	TT	TT	GT	GG	TT	TT	TT	TT	TT	GT	GG	TT	GG	TT	TT	TT	GG	TT	TT	GG	GG	GG	GT	TT	GG
14078938|F|0-31:T>C-31:T>C	T/C	VU03	14573581	+	NA	NA	NA	NA	NA	NA	TT	CC	TT	TT	TT	TT	TT	TT	CC	TT	TT	TT	TT	TT	TT	TT	TT	TT	TT	TT	TT	TT	TT	TT	TT	TT	TT	TT	TT	TT	TT	TT	TT	TT	TT	TT	TT	TT	TT
14074258|F|0-28:G>T-28:G>T	T/G	VU03	14591586	+	NA	NA	NA	NA	NA	NA	GG	GG	TT	TT	GG	GG	TT	GG	GG	TT	TT	TT	TT	TT	TT	TT	GT	GG	TT	TT	TT	TT	TT	GT	GG	TT	GG	TT	TT	TT	GG	TT	TT	GG	GG	NN	TT	TT	GG
14085408|F|0-21:G>A-21:G>A	G/A	VU03	14624395	+	NA	NA	NA	NA	NA	NA	AA	NN	GG	GG	NN	AA	GG	NN	NN	GG	GG	NN	GG	GG	GG	GG	AG	AA	GG	GG	GG	GG	GG	AG	AA	GG	AA	GG	NN	GG	AA	GG	NN	AA	AA	NN	GG	GG	AA
14077062|F|0-9:G>A-9:G>A	G/A	VU03	14701744	+	NA	NA	NA	NA	NA	NA	GG	GG	AA	GG	GG	GG	GG	GG	GG	NN	AA	GG	AA	AA	AA	AA	AG	GG	NN	GG	AA	AG	NN	GG	GG	AA	GG	GG	GG	AA	GG	AA	GG	GG	GG	GG	AG	AA	GG
14086718|F|0-14:G>C-14:G>C	C/G	VU03	14707436	+	NA	NA	NA	NA	NA	NA	GG	CC	CC	CC	NN	GG	CC	GG	CC	CC	CC	CC	CC	CC	CC	CC	GC	CC	CC	CC	CC	CC	CC	GC	GG	CC	GC	CC	NN	CC	GG	CC	NN	GG	GG	GG	CC	CC	GG
14084012|F|0-22:A>C-22:A>C	C/A	VU03	14711088	+	NA	NA	NA	NA	NA	NA	AA	AA	CC	CC	CC	AA	CC	AA	AA	CC	CC	CC	CC	CC	CC	CC	AC	CC	CC	CC	CC	CC	CC	AC	AA	CC	AC	CC	CC	CC	AA	CC	CC	AA	AA	AA	CC	CC	AA
35154714|F|0-27:T>C-27:T>C	T/C	VU03	14748173	+	NA	NA	NA	NA	NA	NA	CC	TT	TT	TT	CC	CC	TT	CC	TT	TT	TT	TT	TT	TT	TT	TT	CT	TT	TT	CC	TT	TT	TT	CC	CC	TT	CT	TT	TT	TT	CC	NN	TT	CC	TT	CC	TT	TT	NN
14083833|F|0-11:A>G-11:A>G	A/G	VU03	14776392	+	NA	NA	NA	NA	NA	NA	AA	AA	GG	AA	AA	AA	AA	AA	AA	GG	GG	AA	GG	GG	GG	GG	AG	AA	AA	AA	GG	AG	GG	AA	AA	GG	AA	AA	AA	GG	AA	GG	AA	AA	AA	AA	GG	GG	AA
14075112|F|0-18:A>G-18:A>G	A/G	VU03	14809241	+	NA	NA	NA	NA	NA	NA	AA	AA	AA	GG	AA	AA	GG	AA	AA	AA	AA	AA	AA	AA	AA	AA	AA	GG	AG	AA	AA	AG	AA	AG	AA	AA	AG	GG	AA	AA	AA	AA	AG	AA	GG	AA	AA	AA	AA
14074405|F|0-36:C>T-36:C>T	T/C	VU03	14809489	+	NA	NA	NA	NA	NA	NA	CC	TT	TT	TT	CC	CC	TT	CC	TT	TT	TT	NN	TT	TT	TT	TT	CT	TT	CT	CC	TT	TT	TT	CT	CC	TT	CT	TT	NN	TT	CC	TT	NN	CC	TT	CC	TT	TT	CC
14085214|F|0-17:C>T-17:C>T	C/T	VU03	14854773	+	NA	NA	NA	NA	NA	NA	CC	CC	CC	CC	CC	CC	CC	CC	TT	CC	CC	CC	CC	CC	CC	CC	CC	CC	CC	CC	CC	CC	CC	CC	CC	CC	CC	CC	CC	CC	CC	CC	CC	CC	CC	CC	CC	CC	CC
14073770|F|0-9:G>A-9:G>A	G/A	VU03	15201801	+	NA	NA	NA	NA	NA	NA	AA	GG	GG	GG	AA	AA	GG	AA	GG	GG	GG	GG	GG	GG	GG	GG	AG	AA	GG	GG	GG	GG	GG	AG	AA	GG	AA	GG	NN	GG	NN	GG	GG	AA	GG	AA	GG	GG	AA
28497735|F|0-20:C>A-20:C>A	C/A	VU03	15267996	+	NA	NA	NA	NA	NA	NA	CC	AA	CC	CC	CC	CC	NN	CC	AA	CC	CC	CC	CC	CC	CC	CC	CC	CC	CC	NN	CC	CC	CC	CC	CC	CC	CC	CC	CC	CC	CC	CC	CC	CC	AA	NN	CC	CC	CC
28497735|F|0-43:T>A-43:T>A	T	VU03	15267996	+	NA	NA	NA	NA	NA	NA	TT	NN	TT	TT	TT	TT	NN	TT	NN	TT	TT	TT	TT	TT	TT	TT	TT	TT	TT	NN	TT	TT	TT	TT	TT	TT	TT	TT	TT	TT	TT	TT	TT	TT	NN	NN	TT	TT	TT
14082750|F|0-34:C>T-34:C>T	C/T	VU03	15271540	+	NA	NA	NA	NA	NA	NA	TT	CC	CC	CC	TT	TT	CC	TT	CC	CC	CC	NN	CC	CC	NN	CC	CT	TT	CC	TT	CC	CC	CC	CT	TT	CC	TT	CC	NN	NN	TT	NN	NN	TT	CC	NN	CC	CC	TT
14084835|F|0-34:A>G-34:A>G	A/G	VU03	15271606	+	NA	NA	NA	NA	NA	NA	AA	GG	AA	AA	AA	AA	AA	AA	GG	AA	AA	AA	AA	AA	NN	AA	AA	AA	AA	NN	AA	AA	AA	AA	AA	AA	AA	AA	NN	NN	AA	NN	NN	AA	GG	NN	AA	AA	AA
14084835|F|0-35:C>T-35:C>T	C/T	VU03	15271606	+	NA	NA	NA	NA	NA	NA	CC	NN	CC	CC	CC	CC	CC	CC	CC	CC	CC	CC	CC	CC	NN	CC	CC	CC	CC	TT	CC	CC	CC	CC	CC	CC	CC	CC	NN	NN	CC	NN	NN	CC	NN	TT	CC	CC	CC
14084835|F|0-37:A>G-37:A>G	A/G	VU03	15271606	+	NA	NA	NA	NA	NA	NA	AA	NN	AA	AA	AA	AA	AA	AA	AA	AA	AA	GG	AA	AA	GG	AA	AA	AA	AA	NN	AA	AA	AA	AA	AA	AA	AA	AA	GG	GG	AA	GG	GG	AA	NN	GG	AA	AA	AA
14079825|F|0-28:T>A-28:T>A	T/A	VU03	15315976	+	NA	NA	NA	NA	NA	NA	TT	TT	TT	TT	TT	AA	TT	TT	TT	TT	TT	TT	TT	TT	TT	TT	AT	AA	TT	TT	TT	TT	TT	TT	TT	TT	AT	TT	TT	TT	AA	TT	TT	TT	TT	TT	TT	TT	AA
14087053|F|0-11:C>A-11:C>A	C/A	VU03	15551472	+	NA	NA	NA	NA	NA	NA	AA	CC	CC	CC	AA	CC	CC	AA	CC	CC	CC	CC	CC	CC	CC	CC	CC	CC	CC	CC	CC	CC	CC	AC	AA	CC	AC	CC	CC	CC	CC	CC	CC	CC	CC	CC	CC	CC	CC
14074019|F|0-44:A>G-44:A>G	A/G	VU03	15551538	+	NA	NA	NA	NA	NA	NA	AA	AA	GG	AA	AA	AA	AA	AA	AA	GG	AA	AA	GG	GG	GG	GG	AA	AA	AA	AA	GG	GG	AA	AA	AA	GG	AA	AA	AA	AA	NN	AA	AA	AA	AA	NN	GG	GG	AA
14074835|F|0-34:C>T-34:C>T	C/T	VU03	15557118	+	NA	NA	NA	NA	NA	NA	TT	CC	CC	CC	TT	CC	CC	TT	CC	CC	CC	CC	CC	CC	CC	CC	CC	CC	CC	TT	CC	CC	CC	CT	TT	CC	CT	CC	CC	CC	CC	CC	CC	CC	CC	CC	CC	CC	CC
14076252|F|0-49:G>A-49:G>A	G/A	VU03	15557184	+	NA	NA	NA	NA	NA	NA	GG	GG	NN	GG	GG	GG	GG	GG	GG	AA	GG	GG	AA	AA	AA	AA	GG	GG	NN	GG	AA	AA	GG	GG	GG	AA	GG	GG	GG	GG	GG	GG	GG	GG	GG	GG	AA	AA	GG
14079912|F|0-28:C>G-28:C>G	C/G	VU03	15632428	+	NA	NA	NA	NA	NA	NA	GG	CC	CC	CC	GG	CC	CC	GG	CC	CC	CC	CC	CC	CC	CC	CC	CC	CC	CC	GG	CC	CC	CC	GC	GG	CC	GG	CC	CC	CC	CC	CC	CC	CC	CC	CC	CC	CC	CC
14073724|F|0-41:A>T-41:A>T	A/T	VU03	15643345	+	NA	NA	NA	NA	NA	NA	TT	AA	AA	AA	TT	AA	AA	TT	AA	AA	AA	AA	AA	AA	AA	AA	AA	AA	AA	AA	AA	AA	AA	AT	TT	AA	AT	AA	AA	AA	AA	AA	AA	AA	AA	AA	AA	AA	AA
14073724|F|0-68:C>A-68:C>A	C/A	VU03	15643345	+	NA	NA	NA	NA	NA	NA	NN	CC	CC	CC	NN	CC	CC	NN	CC	CC	CC	CC	CC	CC	CC	CC	CC	CC	CC	CC	CC	CC	CC	CC	NN	CC	CC	CC	CC	CC	CC	CC	CC	CC	CC	CC	CC	CC	CC
14077010|F|0-18:A>G-18:A>G	A/G	VU03	15643411	+	NA	NA	NA	NA	NA	NA	GG	AA	AA	AA	GG	AA	AA	GG	AA	AA	AA	AA	AA	AA	AA	AA	AA	AA	AA	AA	AA	AA	AA	AG	GG	AA	AG	AA	AA	AA	AA	AA	AA	AA	AA	AA	AA	AA	AA
14074301|F|0-29:C>G-29:C>G	C/G	VU03	15673991	+	NA	NA	NA	NA	NA	NA	GG	CC	GG	CC	GG	CC	CC	NN	CC	GG	GG	CC	GG	GG	GG	GG	CC	CC	CC	CC	GG	GG	CC	GG	GG	GG	GC	CC	CC	CC	CC	CC	CC	CC	CC	NN	GG	GG	CC
35152813|F|0-13:A>G-13:A>G	G/A	VU03	15712739	+	NA	NA	NA	NA	NA	NA	GG	GG	AA	GG	GG	GG	GG	GG	GG	AA	AA	GG	AA	AA	AA	AA	GG	GG	GG	GG	AA	AA	GG	GG	GG	AA	NN	GG	GG	GG	GG	AG	NN	GG	GG	GG	AA	AA	GG
14073769|F|0-23:A>G-23:A>G	A/G	VU03	15742278	+	NA	NA	NA	NA	NA	NA	AA	AA	GG	AA	AA	AA	AA	AA	AA	GG	GG	AA	GG	GG	GG	GG	AA	AA	AA	AA	GG	AG	AA	AG	AA	GG	AA	AA	AA	AA	AA	AA	AA	AA	AA	AA	GG	GG	AA
14082610|F|0-39:A>C-39:A>C	A/C	VU03	15896549	+	NA	NA	NA	NA	NA	NA	AA	AA	CC	AA	AA	AA	AA	AA	AA	CC	CC	AA	CC	CC	CC	CC	AA	AA	AA	AA	CC	CC	AA	AC	AA	CC	AA	AA	AA	AA	AA	AA	AA	AA	AA	AA	CC	CC	AA
14086004|F|0-50:C>T-50:C>T	C/T	VU03	16036212	+	NA	NA	NA	NA	NA	NA	CC	CC	TT	CC	CC	CC	CC	CC	CC	TT	TT	CC	CT	TT	TT	TT	CC	CC	CC	CC	TT	CT	NN	CT	CC	TT	CC	CC	CC	CC	CC	CC	CC	CC	CC	CC	TT	TT	CC
42215316|F|0-17:C>T-17:C>T	T/C	VU03	16136000	+	NA	NA	NA	NA	NA	NA	TT	TT	TT	CC	TT	TT	CC	TT	TT	TT	TT	CC	TT	TT	NN	TT	TT	TT	CC	TT	TT	TT	TT	TT	TT	TT	TT	CC	CC	CC	NN	CC	CC	TT	TT	NN	TT	TT	TT
35152919|F|0-19:T>C-19:T>C	T/C	VU03	16193604	+	NA	NA	NA	NA	NA	NA	TT	TT	TT	CC	TT	TT	CC	TT	TT	TT	TT	CC	TT	TT	TT	TT	TT	TT	CC	TT	TT	NN	NN	TT	TT	NN	TT	CC	CC	CC	TT	CC	NN	TT	TT	NN	TT	TT	TT
14076854|F|0-16:G>T-16:G>T	G/T	VU03	16471728	+	NA	NA	NA	NA	NA	NA	GG	GG	GG	TT	GG	GG	TT	GG	GG	GG	GG	TT	GG	GG	GG	GG	GG	GG	GG	GG	GG	GG	NN	GG	GG	GG	GG	GG	TT	TT	NN	TT	TT	NN	NN	GG	GG	GG	NN
14076854|F|0-23:C>G-23:C>G	C/G	VU03	16471728	+	NA	NA	NA	NA	NA	NA	CC	CC	CC	NN	CC	CC	NN	CC	CC	CC	CC	NN	CC	CC	CC	CC	CC	CC	CC	CC	CC	CC	GG	CC	CC	CC	CC	CC	NN	NN	GG	NN	NN	NN	GG	CC	CC	CC	GG
14077659|F|0-61:T>C-61:T>C	T/C	VU03	16657264	+	NA	NA	NA	NA	NA	NA	TT	TT	TT	TT	CT	TT	TT	TT	TT	TT	TT	TT	TT	TT	TT	TT	TT	TT	TT	TT	TT	TT	TT	TT	CC	TT	CT	TT	TT	TT	TT	TT	TT	TT	TT	TT	TT	TT	TT
14086877|F|0-48:T>C-48:T>C	C/T	VU03	16760896	+	NA	NA	NA	NA	NA	NA	CC	CC	CC	CC	CC	CC	CC	CC	CC	CC	CC	CC	CC	NN	CC	CC	CC	CC	CC	CC	CC	CC	TT	CC	CC	CC	CC	CC	CC	CC	TT	CC	CC	CC	TT	CC	CC	CC	TT
14086877|F|0-41:G>A-41:G>A	A/G	VU03	16768498	+	NA	NA	NA	NA	NA	NA	AA	AA	AA	AA	AA	AA	AA	AA	AA	AA	AA	AA	AA	AA	AA	AA	AA	AA	AA	AA	AA	AA	AG	AA	AA	AA	AA	AA	AA	AA	AG	AA	AA	AA	AG	AA	AA	AA	AG
25365995|F|0-7:C>A-7:C>A	C/A	VU03	16784328	+	NA	NA	NA	NA	NA	NA	CC	CC	CC	CC	CC	CC	CC	CC	CC	CC	CC	CC	CC	CC	CC	CC	CC	CC	CC	CC	CC	CC	CC	CC	CC	CC	CC	CC	CC	CC	CC	CC	CC	CC	CC	CC	CC	CC	CC
42215386|F|0-37:A>G-37:A>G	A/G	VU03	17525692	+	NA	NA	NA	NA	NA	NA	AA	AA	AA	AA	AA	AA	AA	AA	AA	AA	AA	AA	AA	AA	AA	GG	AA	AA	AA	AA	AA	AA	AA	AA	AA	GG	AA	AA	AA	GG	AA	GG	AA	AA	AA	AA	AA	GG	AA
14056123|F|0-33:G>C-33:G>C	G/C	VU03	17699038	+	NA	NA	NA	NA	NA	NA	GG	GG	GG	GG	GG	GG	GG	GG	NN	GG	GG	GG	GG	GG	GG	GG	GG	GG	GG	GG	GG	GG	GG	GG	GG	GG	GG	GG	GG	GG	GG	GG	GG	GG	GG	GG	GG	GG	GG
28497879|F|0-15:A>T-15:A>T	A/T	VU03	17704539	+	NA	NA	NA	NA	NA	NA	AA	AA	AA	AA	AA	AA	AA	AA	AA	AA	AA	TT	AA	AA	AA	AA	AA	AA	AA	AA	AA	AA	AA	AA	AA	AA	AA	AA	AA	TT	AA	AA	TT	AA	AA	AA	AA	AA	AA
35153375|F|0-48:T>A-48:T>A	T/A	VU03	17780049	+	NA	NA	NA	NA	NA	NA	TT	TT	TT	AA	TT	TT	AA	TT	AA	TT	TT	AA	TT	TT	TT	AA	AA	TT	AA	TT	TT	TT	TT	AA	TT	TT	TT	AA	AA	TT	NN	AT	AA	TT	TT	TT	AT	TT	TT
14085044|F|0-45:G>C-45:G>C	G/C	VU03	17984192	+	NA	NA	NA	NA	NA	NA	GG	GG	GG	GG	GG	GG	GG	GG	CC	GG	GG	GG	GG	GG	GG	GG	GG	GG	GG	GG	GG	GG	GG	GG	GG	GG	GG	GG	GG	GG	GG	GG	GG	GG	GG	GG	GG	GG	GG
14077338|F|0-36:C>A-36:C>A	C/A	VU03	18037326	+	NA	NA	NA	NA	NA	NA	CC	CC	CC	CC	CC	CC	CC	CC	AA	CC	CC	CC	CC	CC	CC	CC	CC	CC	CC	CC	CC	CC	CC	CC	CC	CC	CC	CC	CC	CC	CC	CC	CC	CC	CC	CC	CC	CC	CC
14079593|F|0-17:A>G-17:A>G	A/G	VU03	18064563	+	NA	NA	NA	NA	NA	NA	AA	AA	AA	AA	AA	AA	AA	AA	GG	AA	AA	AA	AA	AA	AA	AA	AA	AA	AA	AA	AA	AA	AA	AA	AA	AA	AA	AA	AA	AA	AA	AA	AA	AA	AA	AA	AA	AA	AA
28497996|F|0-9:A>T-9:A>T	A/T	VU03	18440748	+	NA	NA	NA	NA	NA	NA	AA	AA	AA	TT	AA	AA	TT	AA	AA	AA	AA	TT	AA	AA	AA	TT	AT	AA	TT	AA	AA	AA	AA	AT	AA	AA	AA	TT	TT	TT	AA	AA	TT	AA	AA	AA	AA	AA	AA
14086749|F|0-7:T>C-7:T>C	C/T	VU03	18540309	+	NA	NA	NA	NA	NA	NA	CC	CC	CC	TT	TT	CC	TT	CC	CC	TT	TT	CC	TT	TT	TT	CC	CT	CC	CC	CC	CC	CC	CC	CC	CC	TT	CT	CC	TT	TT	TT	TT	CC	CC	CC	CC	CC	TT	TT
42215650|F|0-53:T>G-53:T>G	T	VU03	19360064	+	NA	NA	NA	NA	NA	NA	TT	NN	TT	TT	TT	NN	TT	TT	TT	TT	TT	TT	TT	TT	TT	TT	TT	TT	TT	TT	TT	TT	TT	TT	TT	TT	TT	TT	NN	NN	TT	NN	TT	TT	TT	NN	NN	NN	TT
14077205|F|0-58:A>G-58:A>G	A/G	VU03	19792963	+	NA	NA	NA	NA	NA	NA	GG	AA	GG	AA	GG	GG	AA	AA	AA	GG	GG	AA	GG	GG	GG	AA	AG	AA	GG	GG	GG	GG	AA	AA	AA	GG	AA	GG	AA	AA	AA	AA	AA	AA	AA	NN	AA	GG	AA
14076424|F|0-29:C>T-29:C>T	C/T	VU03	19889653	+	NA	NA	NA	NA	NA	NA	CC	CC	TT	CC	CC	CC	CC	CC	CC	TT	TT	CC	TT	TT	TT	CC	CC	CC	TT	CC	TT	TT	CC	CC	CC	CC	CC	TT	CC	CC	CC	CC	CC	CC	CC	CC	CC	CC	CC
25353303|F|0-50:A>G-50:A>G	A/G	VU03	19923108	+	NA	NA	NA	NA	NA	NA	AA	AA	AA	AA	AA	AA	AA	AA	AA	AA	AA	AA	AA	AA	AA	AA	AA	AA	AA	AA	AA	AA	AA	AA	AA	AA	AG	AA	AA	AA	AA	AA	AA	AA	AA	AA	AG	AA	AA
14073476|F|0-46:C>T-46:C>T	T/C	VU03	20097107	+	NA	NA	NA	NA	NA	NA	TT	CC	TT	CC	TT	CC	CC	CC	CC	TT	TT	CC	TT	TT	TT	CC	CT	CC	TT	TT	TT	TT	CC	CC	CC	TT	CC	TT	CC	CT	CT	CC	CC	CC	CC	NN	CC	TT	CC
25365970|F|0-44:C>G-44:C>G	C/G	VU03	20391901	+	NA	NA	NA	NA	NA	NA	CC	CC	CC	CC	CC	CC	CC	CC	CC	CC	CC	GG	CC	CC	CC	CC	CC	CC	CC	CC	CC	CC	CC	CC	CC	CC	CC	CC	CC	CC	CC	CC	GG	CC	CC	CC	CC	CC	CC
14077056|F|0-7:G>C-7:G>C	C	VU03	20546033	+	NA	NA	NA	NA	NA	NA	CC	CC	CC	CC	CC	CC	CC	CC	CC	CC	CC	CC	CC	CC	CC	CC	CC	CC	CC	CC	CC	NN	CC	CC	CC	CC	NN	CC	CC	CC	CC	CC	CC	CC	CC	CC	CC	CC	CC
100046154|F|0-6:C>T-6:C>T	C/T	VU03	20546099	+	NA	NA	NA	NA	NA	NA	CC	CC	CC	CC	CC	CC	CC	CC	CC	CC	CC	CC	CC	CC	CC	CC	CC	CC	CC	CC	CC	CC	CC	CC	CC	CC	CC	CC	CC	CC	CC	NN	CC	CC	CC	CC	CC	CC	CC
100011829|F|0-49:G>A-49:G>A	G/A	VU03	20642566	+	NA	NA	NA	NA	NA	NA	GG	GG	GG	GG	GG	GG	GG	NN	GG	GG	GG	GG	GG	GG	GG	GG	GG	GG	GG	GG	GG	NN	GG	GG	GG	GG	GG	GG	GG	GG	GG	GG	GG	GG	GG	GG	GG	GG	GG
14076716|F|0-7:C>T-7:C>T	C/T	VU03	20864424	+	NA	NA	NA	NA	NA	NA	CC	CC	CC	CC	CC	CC	CC	CC	CC	CC	CC	CC	CC	CC	CC	CC	CC	CC	CC	CC	CC	CC	CC	CC	CC	CC	CC	CC	CC	CC	CC	CC	CC	CC	CC	CC	CC	CC	CC
14074304|F|0-26:A>T-26:A>T	A/T	VU03	21291328	+	NA	NA	NA	NA	NA	NA	AA	AA	TT	AA	AA	AA	AA	AA	AA	TT	TT	AA	TT	TT	AA	TT	AT	TT	AA	TT	TT	TT	AA	AA	AA	AA	TT	AA	AA	AA	TT	AA	AA	TT	AA	AA	AA	AA	TT
14077497|F|0-60:C>A-60:C>A	A/C	VU03	21296986	+	NA	NA	NA	NA	NA	NA	CC	CC	AA	CC	CC	CC	CC	CC	CC	AA	AA	AA	AA	AA	CC	AA	AC	AA	CC	AA	AA	AA	CC	CC	CC	AA	AC	CC	CC	AA	AA	CC	AA	AA	CC	NN	CC	AA	AC
25354396|F|0-31:G>A-31:G>A	G/A	VU03	21329755	+	NA	NA	NA	NA	NA	NA	GG	GG	GG	AA	GG	GG	AA	GG	GG	GG	GG	GG	GG	GG	GG	GG	GG	GG	AA	GG	GG	GG	GG	AG	GG	GG	GG	AA	AA	GG	GG	AA	GG	GG	GG	GG	GG	GG	GG
14082828|F|0-41:C>T-41:C>T	C/T	VU03	21404869	+	NA	NA	NA	NA	NA	NA	CC	CC	CT	CT	CC	CC	CT	CC	CC	CT	CT	CT	CT	CT	CT	CT	CT	CT	CT	CT	CT	CT	CC	CC	CC	CT	CT	CT	CT	CT	CT	CT	CT	CT	CC	CC	CC	CT	CT
25355837|F|0-28:C>A-28:C>A	C/A	VU03	21404935	+	NA	NA	NA	NA	NA	NA	CC	CC	CC	CC	CC	CC	CC	CC	CC	CC	CC	CC	CC	CC	CC	CC	CC	CC	CC	AC	CC	CC	CC	CC	CC	CC	CC	CC	CC	CC	CC	CC	CC	CC	CC	CC	CC	AC	CC
28203008|F|0-15:C>G-15:C>G	C/G	VU03	21477413	+	NA	NA	NA	NA	NA	NA	CC	CC	CC	CC	CC	CC	CC	CC	CC	CC	CC	GG	CC	CC	CC	CC	CC	CC	GG	CC	CC	CC	CC	CC	CC	GG	CC	GG	CC	GG	CC	CC	GG	CC	CC	NN	CC	GG	CC
14082320|F|0-67:A>T-67:A>T	A/T	VU03	21479994	+	NA	NA	NA	NA	NA	NA	AA	AA	AA	AA	AA	AA	AA	AA	AA	AA	AA	TT	AA	AA	AA	AA	AA	AA	TT	AA	AA	AA	AA	AA	AA	TT	AA	TT	AA	TT	AA	AA	TT	AA	AA	AA	AA	TT	AA
28203151|F|0-49:T>C-49:T>C	C/T	VU03	21480994	+	NA	NA	NA	NA	NA	NA	TT	TT	CC	TT	TT	TT	TT	TT	TT	CC	CC	CC	CC	CC	TT	CC	CT	CC	CC	CC	CC	CC	TT	TT	TT	CC	CT	CC	TT	CC	CC	TT	CC	CC	NN	TT	TT	CC	CC
25365918|F|0-32:G>T-32:G>T	G/T	VU03	21731641	+	NA	NA	NA	NA	NA	NA	GG	GG	GG	GT	GG	GG	GT	GG	GG	GG	GG	GG	GG	GG	GG	GG	GG	GG	GG	GG	GG	GG	GG	GG	GG	GG	GG	GG	GT	TT	GG	GT	GG	GG	GG	GG	GG	GG	GG
14073847|F|0-65:C>T-65:C>T	C/T	VU03	21914407	+	NA	NA	NA	NA	NA	NA	CC	CC	CC	CC	CC	CC	CC	CC	CC	CC	CC	TT	CC	CC	CC	CC	TT	CT	TT	TT	CC	CT	CC	CC	CC	TT	CC	TT	CC	CC	CC	CC	TT	CC	CC	CC	TT	TT	CC
28497649|F|0-37:T>A-37:T>A	T/A	VU03	21914473	+	NA	NA	NA	NA	NA	NA	TT	TT	TT	AA	TT	TT	AA	TT	TT	AA	TT	TT	AA	AA	TT	TT	TT	TT	TT	TT	TT	AT	TT	TT	TT	TT	TT	TT	AA	AA	TT	AA	TT	TT	TT	NN	TT	TT	TT
14086592|F|0-14:A>G-14:A>G	A/G	VU03	21974548	+	NA	NA	NA	NA	NA	NA	AA	AA	GG	AA	AA	AA	AA	AA	AA	AA	AA	AA	AA	AA	AA	AA	AA	AA	AA	AA	GG	AA	AA	AA	AA	AA	AA	AA	AA	AA	AA	AA	AA	AA	AA	AA	AA	AA	AA
25352945|F|0-41:C>G-41:C>G	C/G	VU03	21974975	+	NA	NA	NA	NA	NA	NA	CC	CC	CC	CC	CC	CC	CC	CC	CC	CC	CC	CC	CC	CC	CC	CC	CC	CC	CC	CC	CC	CC	CC	CC	CC	CC	CC	CC	CC	CC	CC	CC	CC	CC	CC	CC	CC	GG	CC
14082811|F|0-35:A>C-35:A>C	A/C	VU03	22285643	+	NA	NA	NA	NA	NA	NA	AA	AA	AA	CC	AA	AA	CC	NN	AA	AA	AA	AA	AA	AA	AA	AA	AA	AA	AA	CC	AA	CC	NN	NN	AA	CC	AA	AA	CC	CC	AA	AA	AC	CC	NN	AA	AA	NN	AA
28203048|F|0-19:A>G-19:A>G	A/G	VU03	22285709	+	NA	NA	NA	NA	NA	NA	AA	AA	AA	GG	AA	AA	GG	NN	AA	AA	AA	AA	AG	AA	AA	AA	AA	AA	AA	GG	AA	GG	AA	AA	AA	GG	NN	AA	GG	GG	AA	AA	AA	GG	AA	NN	AA	GG	AA
35154552|F|0-12:T>C-12:T>C	T/C	VU03	22437178	+	NA	NA	NA	NA	NA	NA	TT	TT	TT	CC	TT	TT	CC	TT	TT	TT	TT	TT	TT	TT	TT	TT	TT	TT	TT	CC	TT	CC	TT	TT	TT	CC	TT	TT	CC	CC	TT	TT	NN	CC	NN	NN	TT	CC	TT
28203002|F|0-19:C>A-19:C>A	A/C	VU03	22457874	+	NA	NA	NA	NA	NA	NA	AA	AA	AA	CC	AA	AA	CC	AA	NN	AA	NN	AA	AA	AA	AA	AA	AA	AA	AC	CC	AA	CC	AA	CC	AA	CC	AA	AA	CC	CC	AA	AA	NN	NN	NN	AA	AA	CC	AA
14075665|F|0-56:G>C-56:G>C	G/C	VU03	22457996	+	NA	NA	NA	NA	NA	NA	GG	GG	GG	GG	GG	GG	GG	GG	GG	GG	GG	GG	GG	GG	GG	GG	GG	GG	GG	GG	GG	GG	GG	GG	GG	GG	GG	GG	GG	GG	GG	GG	GG	CC	CC	GG	GG	GG	GG
14076891|F|0-31:C>T-31:C>T	C/T	VU03	22476727	+	NA	NA	NA	NA	NA	NA	CC	CC	CC	CC	CC	CC	CC	CC	CC	CC	CC	CC	CC	CC	CC	CC	CC	CC	CC	CT	CC	CC	CC	CC	CC	CC	CC	CC	CC	CC	CC	CC	CC	CT	CT	NN	CC	CC	CC
14081515|F|0-50:C>G-50:C>G	G/C	VU03	22476793	+	NA	NA	NA	NA	NA	NA	GG	GG	GG	GG	GG	GG	GG	GG	GG	GG	GG	GG	GG	GG	GG	GG	GG	GG	GG	GG	GG	GG	GG	GG	GG	GG	GG	GG	GG	GG	GG	GG	GG	CC	CC	GG	GG	GG	GG
35154842|F|0-30:C>A-30:C>A	A/C	VU03	22526677	+	NA	NA	NA	NA	NA	NA	AA	AA	AA	CC	AA	CC	CC	AA	AA	AA	AA	AA	AA	AA	AA	AA	AA	CC	AA	CC	AA	CC	AA	AC	AA	CC	AC	AA	CC	CC	AA	AA	AA	NN	NN	NN	AA	NN	AA
25366277|F|0-28:A>G-28:A>G	G/A	VU03	22647754	+	NA	NA	NA	NA	NA	NA	GG	GG	GG	GG	GG	GG	GG	GG	GG	GG	GG	GG	GG	GG	GG	GG	GG	GG	GG	GG	GG	GG	GG	GG	GG	GG	GG	GG	GG	GG	GG	GG	GG	GG	GG	GG	GG	AA	GG
35153707|F|0-17:C>A-17:C>A	C/A	VU03	22930106	+	NA	NA	NA	NA	NA	NA	CC	CC	CC	AA	CC	CC	AA	CC	CC	CC	CC	AA	CC	CC	AA	CC	CC	CC	CC	CC	CC	CC	CC	CC	CC	CC	CC	CC	AA	AA	CC	CC	AA	CC	CC	CC	CC	CC	CC
14074693|F|0-30:C>T-30:C>T	C/T	VU03	22933328	+	NA	NA	NA	NA	NA	NA	CC	CC	CC	CC	CC	CC	CC	CC	CC	CC	CC	CC	CC	CC	CC	CC	CC	CC	CC	CC	CC	CC	NN	NN	NN	CC	CC	NN	NN	CC	CC	CC	CC	TT	TT	NN	CC	CC	CC
35153225|F|0-38:T>G-38:T>G	G/T	VU03	22938405	+	NA	NA	NA	NA	NA	NA	GG	GG	GG	GG	GG	GG	GG	GG	GG	GG	GG	GG	GG	GG	GG	GG	GG	GG	GG	GG	GG	GG	GG	NN	GG	NN	NN	GG	GG	GG	GG	GG	GG	TT	TT	GG	GG	TT	GG
14076197|F|0-56:C>A-56:C>A	C/A	VU03	23095659	+	NA	NA	NA	NA	NA	NA	CC	CC	CC	CC	CC	CC	CC	CC	CC	CC	CC	CC	CC	CC	CC	CC	CC	CC	CC	AC	CC	CC	CC	CC	CC	CC	CC	CC	CC	CC	CC	CC	CC	AA	AA	CC	CC	CC	CC
35153690|F|0-55:C>G-55:C>G	C/G	VU03	23211720	+	NA	NA	NA	NA	NA	NA	CC	CC	CC	CC	CC	CC	CC	CC	CC	CC	CC	CC	CC	CC	CC	CC	CC	CC	CC	CC	CC	CC	CC	CC	CC	CC	CC	CC	CC	CC	CC	CC	CC	GG	CC	CC	CC	CC	CC
35154437|F|0-42:G>A-42:G>A	A/G	VU03	23327418	+	NA	NA	NA	NA	NA	NA	AA	AA	AA	AA	AA	AA	AA	NN	AA	AA	AA	AA	AA	AA	AA	AA	AA	AA	AA	AA	AA	AA	AA	AA	AA	AA	NN	AA	AA	AA	AA	NN	NN	GG	AA	NN	AA	GG	AA
14082902|F|0-49:A>G-49:A>G	A/G	VU03	23339590	+	NA	NA	NA	NA	NA	NA	AA	AA	AA	AA	AA	AA	AA	AA	AA	AA	AA	AA	AA	AA	AA	AA	AA	AA	AA	AA	AA	AA	AA	AA	AA	AA	AA	AA	AA	AA	AA	AA	AA	GG	AA	AA	AA	AA	AA
25355866|F|0-13:T>A-13:T>A	A/T	VU03	23550450	+	NA	NA	NA	NA	NA	NA	AA	AA	AA	AA	AA	AA	AA	AA	AA	AA	AA	AA	AA	AA	AA	AA	AA	AA	AA	AA	AA	AA	AA	AA	AA	AA	AA	AA	AA	AA	AA	AA	AA	AA	AA	AA	AA	TT	AA
14082205|F|0-51:C>T-51:C>T	C	VU03	24070612	+	NA	NA	NA	NA	NA	NA	CC	NN	CC	CC	CC	CC	CC	CC	NN	CC	NN	CC	CC	CC	CC	CC	CC	CC	CC	CC	CC	CC	CC	CC	CC	CC	CC	CC	CC	CC	CC	CC	CC	CC	NN	CC	NN	CC	CC
14082205|F|0-53:T>C-53:T>C	C/T	VU03	24070612	+	NA	NA	NA	NA	NA	NA	CC	TT	CC	CC	CC	CC	CC	CC	TT	CC	TT	CC	CC	CC	CC	CC	CC	CC	CC	CC	CC	CC	CC	CC	CC	CC	CC	CC	CC	CC	CC	CC	CC	CC	TT	CC	TT	CC	CC
14085479|F|0-18:G>A-18:G>A	G/A	VU03	24172786	+	NA	NA	NA	NA	NA	NA	GG	AA	GG	GG	GG	GG	GG	GG	AA	GG	AA	GG	GG	GG	GG	GG	GG	AA	GG	GG	GG	GG	GG	GG	GG	GG	AG	GG	GG	GG	GG	GG	GG	GG	AA	GG	AA	GG	GG
35153699|F|0-14:A>C-14:A>C	C/A	VU03	24172837	+	NA	NA	NA	NA	NA	NA	CC	NN	CC	CC	CC	CC	CC	CC	NN	CC	NN	CC	CC	CC	CC	CC	CC	NN	CC	CC	CC	CC	CC	CC	CC	CC	CC	CC	CC	CC	CC	CC	CC	NN	NN	NN	NN	CC	CC
35153699|F|0-51:C>T-51:C>T	T/C	VU03	24172837	+	NA	NA	NA	NA	NA	NA	TT	CC	TT	TT	TT	TT	TT	TT	CC	TT	CC	TT	TT	TT	TT	TT	TT	CC	TT	TT	TT	TT	TT	TT	TT	TT	CT	TT	TT	TT	TT	TT	TT	NN	CC	NN	CC	TT	TT
14084116|F|0-20:A>C-20:A>C	C/A	VU03	24205912	+	NA	NA	NA	NA	NA	NA	CC	AA	CC	CC	CC	CC	CC	CC	AA	CC	AA	CC	CC	CC	CC	CC	CC	AA	CC	CC	CC	CC	CC	CC	CC	CC	AC	CC	CC	CC	CC	CC	CC	CC	AA	CC	AA	CC	CC
35154521|F|0-40:T>C-40:T>C	C/T	VU03	24319768	+	NA	NA	NA	NA	NA	NA	CC	TT	CC	CC	CC	CC	CC	CC	TT	CC	TT	CC	CC	CC	CC	CC	CT	TT	CT	CC	CC	CC	CC	CC	NN	CC	CT	CC	CC	CC	CC	CC	NN	CC	TT	NN	TT	NN	CC
14075386|F|0-5:C>G-5:C>G	C/G	VU03	24478544	+	NA	NA	NA	NA	NA	NA	CC	CC	GG	CC	CC	CC	CC	CC	CC	GG	CC	CC	GG	CC	CC	GG	CC	CC	CC	CC	GG	GC	CC	CC	CC	CC	CC	CC	CC	CC	CC	CC	CC	CC	CC	CC	CC	CC	CC
14059071|F|0-58:C>T-58:C>T	C/T	VU03	24610354	+	NA	NA	NA	NA	NA	NA	CC	CC	CC	CC	CC	CC	CC	CC	NN	CT	CC	CC	CC	CC	CC	CC	CC	CC	CC	CC	CC	CT	CC	CC	CC	CC	CC	CC	CC	CC	CC	CC	CC	CC	CC	CC	CC	CC	CC
14059190|F|0-7:G>A-7:G>A	G/A	VU03	24610354	+	NA	NA	NA	NA	NA	NA	GG	GG	GG	GG	GG	GG	GG	GG	GG	AA	GG	GG	GG	GG	GG	GG	GG	GG	GG	GG	GG	AA	GG	GG	GG	GG	GG	GG	GG	GG	GG	GG	GG	GG	GG	GG	GG	GG	GG
14076443|F|0-18:C>A-18:C>A	C/A	VU03	24669655	+	NA	NA	NA	NA	NA	NA	CC	CC	CC	CC	CC	CC	CC	CC	CC	CC	AA	CC	CC	CC	CC	CC	CC	AA	CC	CC	CC	CC	CC	CC	CC	CC	AC	CC	CC	CC	CC	CC	CC	CC	AA	CC	AC	NN	CC
14076443|F|0-56:G>C-56:G>C	G/C	VU03	24669655	+	NA	NA	NA	NA	NA	NA	GG	GG	GG	GG	GG	GG	GG	GG	GG	GG	NN	GG	GG	GG	GG	GG	GC	NN	GG	GG	GG	GG	GG	GG	GG	GG	GG	GG	GG	GG	GG	GG	GC	GG	NN	GG	GG	CC	GG
14079831|F|0-9:C>T-9:C>T	T/C	VU03	24688482	+	NA	NA	NA	NA	NA	NA	TT	CC	TT	TT	TT	TT	TT	TT	TT	TT	CC	TT	TT	TT	TT	TT	CT	CC	TT	TT	TT	TT	TT	TT	TT	TT	CT	TT	TT	TT	TT	TT	TT	TT	CC	TT	CC	CC	TT
14073528|F|0-47:T>G-47:T>G	T/G	VU03	24871538	+	NA	NA	NA	NA	NA	NA	TT	TT	TT	TT	TT	TT	TT	TT	TT	TT	TT	TT	TT	TT	TT	TT	GT	TT	TT	TT	TT	TT	TT	TT	TT	TT	TT	TT	TT	TT	TT	TT	TT	TT	TT	TT	TT	GG	TT
14079224|F|0-36:A>C-36:A>C	A/C	VU03	24871604	+	NA	NA	NA	NA	NA	NA	AA	AA	AA	AA	AA	AA	AA	AA	AA	AA	AA	AA	AA	AA	AA	AA	AC	AA	AA	AA	AA	AA	AA	AA	AA	AA	AA	AA	AA	AA	AA	AA	AA	AA	AA	AA	AA	CC	AA
25356409|F|0-9:A>G-9:A>G	A/G	VU03	24888373	+	NA	NA	NA	NA	NA	NA	AA	AA	AA	AA	AA	AA	AA	AA	AA	AA	AA	AA	AA	AA	AA	AA	AA	AA	AA	AA	AA	AG	AA	AA	AA	AA	AA	AA	AA	AA	AA	AA	AA	AA	AA	AA	AA	AA	AA
14085561|F|0-24:G>C-24:G>C	C/G	VU03	25037164	+	NA	NA	NA	NA	NA	NA	CC	GC	CC	CC	CC	GC	CC	CC	CC	CC	CC	NN	CC	CC	CC	NN	CC	CC	CC	CC	CC	CC	CC	GC	CC	GC	CC	CC	CC	CC	CC	CC	CC	CC	GC	CC	CC	GC	CC
35153555|F|0-20:T>C-20:T>C	T/C	VU03	25655926	+	NA	NA	NA	NA	NA	NA	TT	TT	TT	TT	TT	TT	TT	NN	TT	TT	TT	TT	TT	TT	TT	TT	CT	TT	TT	TT	TT	TT	TT	CC	TT	TT	NN	TT	TT	TT	NN	TT	TT	TT	TT	NN	TT	CC	NN
14076562|F|0-61:G>A-61:G>A	G/A	VU03	25857534	+	NA	NA	NA	NA	NA	NA	GG	GG	AA	GG	GG	GG	GG	GG	GG	AA	GG	GG	AA	AA	GG	AA	GG	GG	AA	GG	AA	AA	GG	AG	GG	GG	GG	AA	GG	AG	GG	GG	AG	GG	GG	NN	GG	GG	GG
25356547|F|0-31:G>C-31:G>C	C/G	VU03	26506435	+	NA	NA	NA	NA	NA	NA	CC	CC	CC	CC	CC	CC	CC	CC	CC	CC	CC	CC	CC	CC	GG	CC	GC	CC	CC	CC	CC	GC	CC	GG	CC	GG	CC	CC	CC	CC	CC	CC	CC	CC	CC	CC	CC	GG	CC
35154364|F|0-13:C>A-13:C>A	A/C	VU03	26707211	+	NA	NA	NA	NA	NA	NA	AA	AA	AA	AA	AA	AA	AA	AA	AA	CC	AA	AA	AA	AA	AA	AA	AA	AA	CC	AA	AA	AC	AA	AA	AA	AA	AA	CC	AA	AA	AA	AA	AA	AA	AA	AA	AA	AA	AA
14076892|F|0-59:G>A-59:G>A	G/A	VU03	26943744	+	NA	NA	NA	NA	NA	NA	GG	GG	GG	GG	GG	GG	GG	GG	GG	GG	GG	GG	GG	GG	AG	GG	GG	GG	GG	GG	GG	GG	GG	GG	GG	GG	GG	GG	GG	GG	GG	GG	GG	GG	GG	GG	GG	GG	GG
25366557|F|0-48:C>T-48:C>T	C/T	VU03	27208813	+	NA	NA	NA	NA	NA	NA	CC	CC	CC	CC	CC	CC	CC	CC	CC	CC	CC	CC	CC	CC	CC	CC	CC	CC	CC	CC	CC	CC	CC	CC	CC	CC	CC	CC	CC	CC	CC	CC	CC	CC	CC	CC	CC	TT	CC
25362865|F|0-32:T>G-32:T>G	G/T	VU03	27209122	+	NA	NA	NA	NA	NA	NA	GG	GG	GG	GG	GG	GG	GG	GG	GG	GG	GG	GG	GG	GG	GG	GG	GG	GG	GT	GG	GG	GG	GG	GG	GG	GG	GG	GG	GG	GG	GG	GG	GG	GG	GG	NN	GG	TT	GG
35153508|F|0-27:A>C-27:A>C	A/C	VU03	27610950	+	NA	NA	NA	NA	NA	NA	AA	AA	AA	AA	AA	AA	AA	AA	AA	AA	AA	AA	CC	CC	AA	AA	AA	AA	AA	AA	AA	NN	AA	NN	AA	AA	AA	NN	NN	NN	NN	AA	NN	AA	AA	AA	AA	AA	NN
35154393|F|0-6:A>T-6:A>T	T/A	VU03	27712479	+	NA	NA	NA	NA	NA	NA	TT	TT	TT	TT	TT	AA	TT	TT	TT	TT	TT	TT	TT	TT	AA	TT	TT	TT	TT	TT	TT	TT	TT	TT	TT	AA	TT	TT	TT	TT	TT	TT	TT	TT	TT	TT	TT	AA	TT
35153341|F|0-21:T>A-21:T>A	A/T	VU03	27833505	+	NA	NA	NA	NA	NA	NA	AA	AA	AA	AA	AA	TT	AA	AA	AA	AA	AA	AA	AA	AA	TT	AA	AA	AA	AA	AA	AA	AA	AA	AA	AA	TT	AA	AA	AA	AA	AA	AA	AA	AA	AA	AA	AA	TT	AA
35154328|F|0-15:T>C-15:T>C	T/C	VU03	27882946	+	NA	NA	NA	NA	NA	NA	TT	TT	TT	TT	TT	CC	TT	TT	TT	TT	TT	TT	TT	TT	CC	TT	TT	TT	CT	TT	TT	TT	TT	TT	TT	CC	TT	TT	TT	TT	TT	TT	TT	TT	TT	TT	TT	CC	TT
25354276|F|0-12:C>G-12:C>G	G/C	VU03	28030614	+	NA	NA	NA	NA	NA	NA	GG	GG	GG	GG	GG	GG	GG	GG	GG	GG	GG	GG	GG	GG	CC	GG	GG	GG	GC	GG	GG	GG	GG	GG	GG	CC	GG	GG	GG	GG	GG	GG	GG	GG	GG	GG	GG	CC	GG
14075958|F|0-38:C>G-38:C>G	G/C	VU03	28495937	+	NA	NA	NA	NA	NA	NA	GG	GG	CC	GG	GG	GG	GG	GG	GG	GG	GG	GG	CC	CC	GG	GG	GG	GG	GG	GG	CC	CC	GG	GG	GG	GG	NN	GG	CC	GG	GG	GG	GG	GG	GG	GG	GG	CC	GG
35152858|F|0-34:G>C-34:G>C	G/C	VU03	28596515	+	NA	NA	NA	NA	NA	NA	GG	GG	CC	GG	NN	GG	GG	GG	GG	GG	GG	GG	CC	CC	GG	NN	GG	GG	GG	GG	CC	CC	GG	NN	GG	GG	GG	GG	CC	NN	GG	NN	GG	GG	GG	NN	GG	CC	GG
28497517|F|0-5:G>A-5:G>A	G/A	VU03	28665342	+	NA	NA	NA	NA	NA	NA	GG	GG	GG	AA	GG	GG	AA	GG	GG	GG	GG	AA	GG	GG	GG	GG	GG	GG	GG	GG	GG	AG	GG	GG	GG	AA	GG	GG	GG	AG	GG	AA	AA	GG	GG	GG	GG	GG	GG
14058488|F|0-20:C>T-20:C>T	C/T	VU03	29982834	+	NA	NA	NA	NA	NA	NA	CC	CC	CC	CC	CC	CC	CC	CC	CC	CC	CC	CC	CC	CC	CC	CC	CC	CC	CC	CC	CC	CC	CC	CC	CC	CC	CC	CC	CC	CC	CC	CC	CC	CT	CC	CC	CC	CC	CC
14083604|F|0-20:T>C-20:T>C	C/T	VU03	30240505	+	NA	NA	NA	NA	NA	NA	CT	CT	CC	CC	CC	CC	CC	CC	CC	CC	CT	CC	CC	CC	NN	CC	CC	CT	CC	CC	CC	CC	CT	CC	CT	CC	CT	CC	CC	CC	CC	CC	CC	CT	CT	CT	CT	CC	CC
14082185|F|0-21:G>A-21:G>A	G/A	VU03	31641338	+	NA	NA	NA	NA	NA	NA	GG	GG	NN	GG	GG	GG	GG	GG	GG	GG	GG	GG	GG	GG	GG	GG	NN	GG	GG	GG	GG	GG	GG	NN	GG	GG	NN	AG	GG	GG	GG	GG	GG	GG	GG	GG	GG	NN	GG
35155029|F|0-39:C>T-39:C>T	C/T	VU03	31688646	+	NA	NA	NA	NA	NA	NA	CC	CC	CC	CC	CC	CC	CC	CC	CC	CC	CC	NN	CC	CC	CC	CC	CC	CC	CC	CC	CC	CT	CC	CC	CC	TT	CC	CC	NN	NN	NN	NN	NN	CC	CC	CC	CC	CC	CC
35155030|F|0-14:A>T-14:A>T	A/T	VU03	31688646	+	NA	NA	NA	NA	NA	NA	AA	AA	AA	AA	AA	AA	NN	AA	AA	AA	AA	NN	AA	AA	AA	AA	AA	AA	AA	AA	AA	AT	AA	AA	AA	TT	AA	AA	NN	NN	AA	NN	NN	AA	AA	AA	AA	AA	AA
25358701|F|0-20:A>T-20:A>T	T/A	VU03	33181878	+	NA	NA	NA	NA	NA	NA	TT	TT	TT	AA	TT	TT	AA	TT	TT	TT	TT	AA	TT	TT	TT	TT	TT	TT	TT	TT	TT	AT	TT	TT	TT	TT	TT	TT	AA	AA	TT	AA	AA	TT	TT	TT	TT	AA	TT
14079512|F|0-14:C>T-14:C>T	C/T	VU03	33181914	+	NA	NA	NA	NA	NA	NA	CC	CC	TT	CC	CC	CC	CC	CC	CC	CC	CC	CC	TT	CC	CC	CC	CC	CC	CC	CC	TT	TT	CC	CC	CC	CC	CC	CC	CC	CC	CC	CC	CC	CC	CC	CC	CC	CC	CC
14073846|F|0-33:T>C-33:T>C	T/C	VU03	33506718	+	NA	NA	NA	NA	NA	NA	TT	TT	TT	CC	TT	TT	CC	TT	TT	TT	TT	CC	TT	TT	TT	TT	TT	TT	TT	TT	TT	TT	TT	TT	TT	TT	TT	TT	TT	TT	TT	CC	CC	TT	TT	TT	TT	TT	TT
14086860|F|0-23:A>C-23:A>C	A/C	VU03	33887694	+	NA	NA	NA	NA	NA	NA	AA	AA	AA	AA	AC	AA	AA	AC	AC	AC	AA	AC	AA	AA	AA	AA	AC	AA	AC	AA	AC	AA	AA	AC	AA	AA	AC	AC	AA	AA	AC	AA	AA	AA	AA	AA	AC	AA	AC
14059683|F|0-36:G>A-36:G>A	G	VU03	34413611	+	NA	NA	NA	NA	NA	NA	GG	GG	GG	GG	GG	GG	GG	GG	GG	GG	GG	GG	GG	GG	GG	GG	GG	GG	GG	GG	GG	GG	GG	GG	GG	GG	GG	GG	GG	GG	GG	GG	GG	GG	GG	GG	GG	GG	GG
35153090|F|0-65:C>T-65:C>T	C/T	VU03	34606464	+	NA	NA	NA	NA	NA	NA	CC	CC	CC	CC	CC	CC	CC	CC	CC	CC	CC	TT	CC	CC	CC	CC	CC	CC	CC	CC	CC	CC	CC	CC	CC	CC	CC	CC	CC	CC	CC	CC	TT	CC	CC	CC	CC	CC	CC
25363921|F|0-23:C>T-23:C>T	C/T	VU03	34882843	+	NA	NA	NA	NA	NA	NA	CC	CC	CC	CC	CC	CC	CC	CC	CC	CC	CC	CC	TT	CC	CC	CC	CC	CC	CC	CC	CC	CT	CC	CT	CC	CC	CC	CC	CC	CC	CC	CC	CC	CC	CC	CC	CC	CC	CC
35153869|F|0-18:T>A-18:T>A	A/T	VU03	34920977	+	NA	NA	NA	NA	NA	NA	AA	AA	AA	AA	AA	AA	AA	NN	AA	AA	AA	AA	TT	AA	AA	AA	AA	AA	AA	AA	AA	AT	AA	AA	AA	AA	AA	AA	AA	AA	AA	AA	AA	AA	AA	AA	AA	AA	AA
35152715|F|0-16:A>T-16:A>T	A/T	VU03	34921043	+	NA	NA	NA	NA	NA	NA	AA	AA	AA	AA	AA	AA	AA	AA	AA	AA	AA	AA	TT	AA	AA	AA	AA	AA	AA	AA	AA	AT	AA	AA	AA	AA	AA	AA	AA	AA	AA	AA	AA	AA	AA	NN	AA	AA	AA
14074534|F|0-27:C>A-27:C>A	C/A	VU03	35232692	+	NA	NA	NA	NA	NA	NA	AA	AA	CC	CC	AA	AA	CC	AA	AA	CC	AA	CC	CC	CC	CC	CC	AA	AA	CC	AA	CC	CC	NN	AC	AA	AA	AA	CC	CC	CC	AA	CC	CC	AA	AA	AA	AA	AA	AA
35154620|F|0-32:C>T-32:C>T	C/T	VU03	35740471	+	NA	NA	NA	NA	NA	NA	NN	CC	NN	CC	CC	CC	CC	NN	CC	CC	NN	CC	CC	CC	CC	CT	CC	CC	CC	NN	CC	CC	CC	CT	CC	CC	CC	CC	CC	NN	CC	CC	CC	CC	CC	CC	CC	NN	CC
14062073|F|0-48:T>A-48:T>A	T/A	VU03	35973054	+	NA	NA	NA	NA	NA	NA	NN	TT	TT	TT	NN	TT	TT	AT	TT	TT	TT	TT	AA	TT	TT	TT	TT	TT	TT	NN	TT	TT	AA	TT	AA	TT	TT	TT	TT	TT	NN	TT	TT	TT	TT	NN	TT	AA	TT
14056600|F|0-22:C>G-22:C>G	C/G	VU03	35974976	+	NA	NA	NA	NA	NA	NA	CC	CC	CC	CC	CC	CC	CC	GG	CC	CC	CC	CC	GG	CC	CC	CC	CC	CC	CC	CC	CC	CC	GG	CC	GG	CC	CC	CC	CC	CC	CC	CC	CC	CC	CC	CC	CC	GG	CC
100016138|F|0-33:T>C-33:T>C	T/C	VU03	36110112	+	NA	NA	NA	NA	NA	NA	TT	TT	TT	TT	TT	TT	TT	TT	TT	TT	TT	TT	TT	TT	TT	TT	TT	TT	TT	NN	TT	TT	TT	TT	TT	TT	TT	TT	TT	NN	TT	TT	NN	TT	TT	NN	TT	TT	TT
14056643|F|0-68:A>T-68:A>T	A/T	VU03	36316244	+	NA	NA	NA	NA	NA	NA	AA	AA	AA	AA	AA	AA	AA	AA	AA	AA	AA	AA	AA	AA	AA	AA	AA	AA	AA	AA	AA	AA	AA	AA	TT	AA	AA	AA	AA	AA	AA	AA	AA	AA	AA	AA	AA	AA	AA
14080015|F|0-45:T>A-45:T>A	T/A	VU03	36323051	+	NA	NA	NA	NA	NA	NA	TT	TT	TT	TT	AA	TT	TT	TT	TT	TT	TT	TT	TT	TT	TT	TT	TT	TT	TT	TT	TT	TT	TT	TT	TT	TT	AT	TT	TT	TT	TT	TT	TT	TT	TT	TT	TT	TT	TT
14076001|F|0-29:T>A-29:T>A	T/A	VU03	36326883	+	NA	NA	NA	NA	NA	NA	TT	TT	TT	TT	AT	TT	TT	TT	TT	TT	TT	TT	TT	TT	TT	TT	TT	TT	TT	TT	TT	TT	TT	TT	TT	TT	AT	TT	TT	TT	TT	TT	TT	TT	TT	TT	TT	TT	TT
14075209|F|0-29:A>T-29:A>T	A/T	VU03	36355154	+	NA	NA	NA	NA	NA	NA	AA	AA	AA	AA	TT	AA	AA	AA	AA	AA	AA	AA	AA	AA	AA	AA	AA	AA	AA	AA	AA	AA	AA	AA	TT	AA	AT	AA	AA	AA	AA	AA	AA	AA	AA	AA	AA	AA	AA
14084597|F|0-28:G>A-28:G>A	G/A	VU03	36373907	+	NA	NA	NA	NA	NA	NA	GG	GG	GG	GG	NN	GG	GG	GG	GG	GG	GG	GG	GG	GG	GG	GG	GG	AA	GG	GG	GG	AG	GG	AG	AA	GG	AA	GG	GG	GG	GG	GG	GG	GG	GG	GG	GG	GG	GG
14084597|F|0-58:T>C-58:T>C	T/C	VU03	36373907	+	NA	NA	NA	NA	NA	NA	TT	TT	TT	TT	CC	TT	TT	TT	TT	TT	TT	TT	TT	TT	TT	TT	TT	NN	TT	TT	TT	TT	TT	TT	NN	TT	CC	TT	TT	TT	TT	TT	TT	TT	TT	TT	TT	TT	TT
14073378|F|0-43:T>A-43:T>A	T/A	VU03	36429522	+	NA	NA	NA	NA	NA	NA	TT	TT	TT	TT	TT	TT	TT	TT	TT	TT	TT	TT	TT	TT	TT	TT	TT	TT	TT	TT	TT	TT	TT	TT	TT	TT	TT	TT	TT	TT	TT	TT	TT	TT	TT	NN	TT	TT	TT
14073814|F|0-18:C>T-18:C>T	T/C	VU03	36440676	+	NA	NA	NA	NA	NA	NA	CC	CC	TT	TT	CC	TT	TT	CC	CC	TT	CC	TT	TT	TT	TT	TT	TT	TT	TT	CC	TT	TT	TT	CC	CC	TT	TT	TT	TT	TT	CC	TT	TT	CC	CC	CC	CC	TT	CC
14076160|F|0-28:A>G-28:A>G	G/A	VU03	36441871	+	NA	NA	NA	NA	NA	NA	GG	GG	GG	GG	AA	GG	GG	GG	GG	GG	GG	GG	GG	GG	GG	GG	GG	GG	GG	GG	GG	GG	GG	GG	GG	GG	GG	NN	GG	GG	GG	GG	GG	GG	GG	NN	GG	GG	GG
100046703|F|0-23:C>A-23:C>A	C/A	VU03	36494642	+	NA	NA	NA	NA	NA	NA	CC	CC	CC	NN	NN	CC	CC	CC	NN	CC	CC	CC	CC	CC	CC	CC	CC	CC	NN	CC	CC	CC	CC	CC	AA	CC	NN	CC	NN	NN	CC	CC	CC	CC	CC	CC	CC	CC	NN
35153742|F|0-15:T>C-15:T>C	C/T	VU03	36494708	+	NA	NA	NA	NA	NA	NA	CC	CC	CC	CC	NN	CC	CC	NN	CC	CC	CC	CC	CC	CC	CC	CC	NN	CC	NN	CC	CC	CT	NN	TT	NN	CC	NN	NN	NN	NN	CC	CC	CC	CC	CC	CC	CC	CC	CC
35154055|F|0-38:A>G-38:A>G	A/G	VU03	36527652	+	NA	NA	NA	NA	NA	NA	GG	GG	NN	AA	GG	AA	AA	AA	GG	AA	GG	AA	AA	AA	AA	AA	AA	AA	AA	GG	AA	AA	AA	AA	GG	NN	GG	AA	AA	AA	GG	AA	NN	GG	GG	NN	GG	AA	GG
14085560|F|0-31:T>G-31:T>G	T/G	VU03	36631977	+	NA	NA	NA	NA	NA	NA	TT	TT	TT	TT	GG	TT	TT	TT	TT	TT	TT	TT	TT	TT	TT	TT	TT	TT	TT	TT	TT	TT	TT	TT	TT	TT	GT	TT	TT	TT	TT	TT	TT	TT	TT	TT	TT	TT	TT
14058603|F|0-40:G>A-40:G>A	G/A	VU03	36652673	+	NA	NA	NA	NA	NA	NA	GG	GG	GG	AA	NN	AA	AA	GG	GG	GG	GG	AA	GG	GG	GG	GG	AG	GG	AA	GG	GG	GG	GG	GG	GG	GG	GG	AA	AA	AA	GG	AA	AA	NN	GG	GG	GG	AA	GG
14082924|F|0-48:G>C-48:G>C	C/G	VU03	36712691	+	NA	NA	NA	NA	NA	NA	CC	CC	CC	CC	CC	GG	CC	CC	CC	GG	CC	CC	GG	GG	GG	GG	CC	CC	GC	CC	CC	GG	CC	GC	CC	GG	CC	GG	CC	CC	CC	CC	CC	CC	CC	CC	CC	GG	CC
35153825|F|0-60:T>C-60:T>C	T/C	VU03	36712757	+	NA	NA	NA	NA	NA	NA	TT	TT	CC	CC	TT	TT	CC	NN	TT	NN	TT	CC	TT	TT	TT	TT	CT	TT	TT	TT	CC	NN	TT	NN	CC	TT	TT	TT	CC	CC	TT	CC	CC	TT	TT	TT	TT	TT	TT
14081948|F|0-33:C>T-33:C>T	T/C	VU03	36731576	+	NA	NA	NA	NA	NA	NA	TT	TT	TT	TT	CC	TT	TT	CC	CC	NN	CC	TT	NN	NN	NN	TT	CT	CC	NN	TT	TT	TT	TT	TT	TT	NN	NN	NN	TT	TT	TT	TT	TT	CC	TT	TT	TT	TT	CC
14075326|F|0-63:C>T-63:C>T	T/C	VU03	36821658	+	NA	NA	NA	NA	NA	NA	CC	TT	TT	CC	NN	CC	CC	TT	CT	TT	TT	CC	TT	TT	TT	TT	CT	CC	TT	TT	TT	TT	TT	TT	TT	TT	CC	TT	CC	CC	TT	CC	CC	TT	TT	TT	TT	CC	TT
14074331|F|0-26:T>G-26:T>G	T/G	VU03	36873103	+	NA	NA	NA	NA	NA	NA	TT	TT	TT	TT	GG	TT	TT	TT	TT	TT	TT	TT	TT	TT	TT	TT	TT	TT	TT	TT	TT	TT	TT	TT	TT	TT	GT	TT	TT	TT	TT	TT	TT	TT	TT	TT	TT	TT	TT
14073950|F|0-9:G>A-9:G>A	G/A	VU03	36927903	+	NA	NA	NA	NA	NA	NA	GG	GG	GG	GG	AA	GG	GG	GG	GG	GG	GG	GG	GG	GG	GG	GG	GG	GG	GG	GG	GG	AG	GG	GG	GG	GG	AG	GG	GG	AG	GG	GG	GG	GG	GG	GG	GG	GG	GG
42215639|F|0-31:G>T-31:G>T	G	VU03	36941420	+	NA	NA	NA	NA	NA	NA	GG	GG	GG	GG	GG	GG	GG	GG	GG	GG	GG	GG	GG	GG	GG	GG	GG	GG	GG	GG	GG	GG	GG	GG	GG	GG	GG	NN	GG	GG	GG	GG	GG	NN	GG	NN	GG	GG	NN
14075222|F|0-50:T>A-50:T>A	A/T	VU03	36942376	+	NA	NA	NA	NA	NA	NA	TT	TT	AA	AA	TT	TT	AA	TT	TT	AA	TT	AA	AA	AA	AA	AA	TT	TT	AT	TT	AA	AA	TT	AT	TT	AA	TT	AA	AA	AA	TT	AA	AA	TT	TT	TT	TT	TT	TT
28497566|F|0-15:C>A-15:C>A	C/A	VU03	36966111	+	NA	NA	NA	NA	NA	NA	CC	CC	CC	AA	CC	CC	CC	CC	CC	CC	CC	CC	CC	CC	CC	CC	CC	CC	CC	CC	CC	CC	CC	CC	CC	CC	CC	CC	CC	CC	CC	CC	CC	CC	CC	CC	CC	CC	CC
42215560|F|0-10:A>G-10:A>G	A/G	VU03	36986894	+	NA	NA	NA	NA	NA	NA	AA	GG	AA	AA	NN	GG	AA	GG	AA	AA	AA	AA	AA	AA	AA	AA	GG	GG	AA	GG	NN	NN	AA	AA	GG	NN	NN	AA	AA	AA	AA	NN	NN	AA	AA	NN	AA	NN	AA
14084591|F|0-21:T>C-21:T>C	T/C	VU03	37140262	+	NA	NA	NA	NA	NA	NA	TT	TT	TT	TT	CC	TT	TT	TT	TT	TT	TT	TT	TT	TT	TT	TT	TT	TT	TT	TT	TT	TT	TT	TT	TT	TT	CT	TT	TT	TT	TT	TT	TT	TT	TT	NN	TT	TT	TT
35153895|F|0-68:A>C-68:A>C	C/A	VU03	37140328	+	NA	NA	NA	NA	NA	NA	AA	CC	CC	CC	CC	CC	CC	CC	AA	CC	AA	CC	CC	CC	CC	CC	CC	CC	CC	CC	CC	AC	AA	AC	CC	CC	NN	CC	CC	CC	CC	CC	CC	AA	AA	CC	AA	CC	AA
25355434|F|0-13:A>T-13:A>T	A/T	VU03	37187727	+	NA	NA	NA	NA	NA	NA	AA	AA	AA	TT	AA	AA	TT	AA	AA	AA	AA	TT	AA	AA	TT	AA	AA	AA	AA	AA	AA	AA	AA	AT	AA	TT	AA	AA	TT	TT	AA	TT	TT	AA	AA	AA	AA	AA	AA
100011080|F|0-5:G>A-5:G>A	G/A	VU03	37345417	+	NA	NA	NA	NA	NA	NA	GG	GG	GG	GG	GG	GG	GG	GG	GG	GG	GG	GG	GG	GG	GG	GG	GG	GG	GG	GG	GG	GG	AA	GG	GG	GG	GG	GG	GG	GG	GG	GG	GG	GG	GG	GG	GG	NN	GG
14084684|F|0-21:A>G-21:A>G	A/G	VU03	37540927	+	NA	NA	NA	NA	NA	NA	GG	AA	GG	AA	GG	AA	AA	AA	AA	GG	AA	AA	GG	GG	AA	GG	AA	AA	GG	AA	GG	GG	GG	AG	AA	GG	AG	GG	AA	AA	AA	AA	AA	AA	AA	NN	AA	GG	AA
14055809|F|0-28:C>T-28:C>T	C	VU03	37618165	+	NA	NA	NA	NA	NA	NA	CC	CC	CC	CC	CC	CC	CC	CC	CC	CC	CC	CC	CC	CC	CC	CC	CC	CC	CC	CC	CC	CC	CC	CC	CC	CC	CC	CC	CC	CC	CC	CC	CC	CC	CC	CC	CC	CC	CC
14055087|F|0-30:A>C-30:A>C	A	VU03	37624433	+	NA	NA	NA	NA	NA	NA	AA	AA	AA	AA	AA	AA	AA	AA	AA	AA	AA	AA	AA	AA	AA	AA	AA	AA	AA	AA	AA	AA	AA	AA	AA	AA	AA	AA	AA	AA	AA	AA	AA	AA	AA	AA	AA	AA	AA
14081737|F|0-9:G>T-9:G>T	G/T	VU03	37848934	+	NA	NA	NA	NA	NA	NA	GG	GG	GG	GG	TT	GG	GG	GG	GG	GG	GG	GG	GG	GG	GG	GG	GG	GG	GG	GG	GG	GG	GG	GG	GG	GG	GT	GG	GG	GG	GG	GG	GG	GG	GG	GG	GG	GG	GG
14076003|F|0-10:T>G-10:T>G	T/G	VU03	37893213	+	NA	NA	NA	NA	NA	NA	TT	TT	TT	TT	GG	TT	TT	TT	TT	TT	TT	TT	TT	TT	TT	TT	TT	TT	TT	TT	TT	TT	TT	TT	TT	TT	GT	TT	TT	TT	TT	TT	TT	TT	TT	NN	TT	TT	TT
14084894|F|0-57:G>A-57:G>A	G/A	VU03	38023482	+	NA	NA	NA	NA	NA	NA	GG	GG	AA	NN	AA	AA	NN	AA	GG	GG	AA	NN	AA	GG	GG	GG	AA	AA	AA	GG	AA	AG	GG	GG	GG	GG	AA	AA	NN	AA	GG	AA	NN	GG	AA	GG	GG	AA	AA
14082634|F|0-67:C>T-67:C>T	C/T	VU03	38026015	+	NA	NA	NA	NA	NA	NA	CT	CT	CC	CC	CT	CT	CC	CC	CT	CC	CC	CC	CT	CT	CC	CT	CT	CC	CT	CT	CC	CT	CC	CT	CT	CT	CT	CT	CC	CC	CT	CC	CC	CT	CC	CT	CC	CC	CC
25365964|F|0-52:A>C-52:A>C	C/A	VU03	38061268	+	NA	NA	NA	NA	NA	NA	CC	CC	CC	CC	AC	CC	CC	NN	CC	CC	CC	CC	CC	CC	CC	CC	CC	CC	CC	CC	NN	CC	CC	CC	CC	NN	AC	CC	NN	CC	NN	CC	CC	CC	CC	NN	CC	NN	CC
25365964|F|0-53:A>C-53:A>C	A/C	VU03	38061268	+	NA	NA	NA	NA	NA	NA	AA	AA	AA	AA	CC	AA	AA	AA	AA	AA	AA	AA	AA	AA	AA	AA	AA	AA	AA	AA	AA	AA	AA	AA	AA	AA	AC	AA	AA	AA	AA	AA	AA	AA	AA	NN	AA	AA	AA
25364588|F|0-32:T>A-32:T>A	A/T	VU03	38087352	+	NA	NA	NA	NA	NA	NA	AA	AA	TT	TT	NN	AA	TT	AA	AA	AA	AA	TT	AA	AA	AA	AA	AT	AA	AA	AA	TT	AA	AA	AA	AA	AA	AA	AA	TT	TT	AA	TT	TT	AA	AA	AA	AA	TT	AA
100010248|F|0-12:G>T-12:G>T	G/T	VU03	38089663	+	NA	NA	NA	NA	NA	NA	GG	GG	GG	GG	TT	GG	GG	NN	GG	GG	GG	GG	GG	GG	GG	GG	GG	GG	GG	GG	GG	GG	NN	GG	GG	GG	GT	GG	GG	GG	GG	GG	NN	GG	GG	GG	GG	NN	GG
14083734|F|0-33:A>G-33:A>G	A/G	VU03	38110915	+	NA	NA	NA	NA	NA	NA	AA	AA	AA	AA	GG	AA	AA	AA	AA	AA	AA	AA	AA	AA	AA	AA	AA	AA	AA	AA	AA	AA	AA	AA	AA	AA	AG	AA	AA	AA	AA	AA	AA	AA	AA	AA	AA	AA	AA
14074075|F|0-57:C>A-57:C>A	C/A	VU03	38232366	+	NA	NA	NA	NA	NA	NA	CC	CC	CC	CC	AA	CC	CC	CC	CC	CC	CC	CC	CC	CC	CC	CC	CC	CC	CC	CC	CC	CC	CC	CC	CC	CC	AC	CC	CC	CC	CC	CC	CC	CC	CC	NN	CC	CC	CC
14073687|F|0-59:T>A-59:T>A	A/T	VU03	38245104	+	NA	NA	NA	NA	NA	NA	AA	AA	AA	TT	TT	AA	TT	AA	AA	AA	AA	TT	AA	AA	AA	AA	AT	AA	TT	AA	AA	AA	AA	AA	AA	AA	AT	TT	TT	TT	AA	TT	TT	AA	AA	AA	AA	TT	AA
14087712|F|0-32:A>C-32:A>C	A/C	VU03	38245844	+	NA	NA	NA	NA	NA	NA	AA	AA	AA	AA	CC	AA	AA	AA	AA	AA	AA	AA	AA	AA	AA	AA	AA	AA	AA	AA	AA	AA	AA	AA	AA	AA	AC	AA	AA	AA	AA	AA	AA	AA	AA	AA	AA	AA	AA
14073841|F|0-7:A>G-7:A>G	G/A	VU03	38264518	+	NA	NA	NA	NA	NA	NA	GG	GG	GG	GG	AA	GG	GG	NN	GG	GG	GG	GG	GG	GG	GG	GG	NN	GG	GG	GG	GG	GG	GG	GG	NN	GG	NN	GG	GG	GG	GG	GG	GG	GG	NN	GG	GG	GG	GG
14073670|F|0-58:T>A-58:T>A	A/T	VU03	38291750	+	NA	NA	NA	NA	NA	NA	AA	AA	AA	AA	TT	AA	AA	AA	AA	AA	AA	AA	AA	AA	AA	AA	AA	AA	AA	AA	AA	NN	AA	AA	AA	AA	TT	AA	AA	AA	AA	AA	AA	AA	AA	AA	AA	AA	AA
100008874|F|0-61:A>T-61:A>T	T/A	VU03	38310988	+	NA	NA	NA	NA	NA	NA	TT	TT	TT	TT	AA	TT	TT	TT	TT	TT	TT	TT	TT	TT	TT	TT	TT	TT	TT	TT	TT	TT	TT	TT	TT	TT	AT	TT	TT	TT	TT	NN	TT	TT	TT	NN	TT	TT	TT
14085745|F|0-15:A>G-15:A>G	G/A	VU03	38623820	+	NA	NA	NA	NA	NA	NA	AA	AA	GG	GG	NN	GG	GG	AA	AA	GG	AA	GG	GG	GG	GG	GG	GG	AA	GG	AA	GG	GG	AA	AG	AA	GG	AA	GG	GG	GG	AG	GG	GG	AA	AA	AA	AA	GG	AA
14075408|F|0-11:G>C-11:G>C	G/C	VU03	38702701	+	NA	NA	NA	NA	NA	NA	GG	GG	GG	GG	CC	GG	GG	GG	GG	GG	GG	GG	GG	GG	GG	GG	GG	GG	GG	GG	GG	GG	GG	GG	GG	GG	GC	GG	GG	GG	GG	GG	GG	GG	GG	GG	GG	GG	GG
28203032|F|0-15:T>G-15:T>G	T/G	VU03	39111728	+	NA	NA	NA	NA	NA	NA	TT	TT	TT	GG	TT	TT	TT	TT	TT	TT	TT	GG	TT	GG	TT	TT	GG	TT	TT	TT	TT	TT	TT	TT	TT	TT	TT	TT	GG	TT	TT	TT	GT	TT	TT	TT	TT	NN	NN
35152795|F|0-8:C>T-8:C>T	C/T	VU03	39219420	+	NA	NA	NA	NA	NA	NA	CC	CC	CC	TT	CC	CC	TT	CC	CC	CC	CC	TT	CC	CC	CC	CC	CC	CC	CC	CC	CC	CC	CC	CC	CC	CC	CC	CC	TT	TT	CC	TT	TT	CC	CC	NN	NN	CC	CC
25355013|F|0-28:C>T-28:C>T	C	VU03	39317759	+	NA	NA	NA	NA	NA	NA	CC	CC	CC	CC	CC	CC	CC	CC	CC	CC	CC	CC	CC	CC	CC	CC	CC	CC	CC	CC	CC	CC	CC	CC	CC	CC	CC	CC	CC	CC	CC	CC	CC	CC	CC	CC	CC	CC	CC
14074060|F|0-27:G>A-27:G>A	G/A	VU03	39470424	+	NA	NA	NA	NA	NA	NA	GG	GG	GG	GG	AA	GG	GG	AG	GG	GG	AG	GG	GG	GG	GG	GG	AG	AG	GG	AA	GG	GG	GG	GG	AA	GG	AG	GG	GG	GG	GG	GG	GG	GG	AG	AG	AG	AG	GG
14087309|F|0-19:C>T-19:C>T	C/T	VU03	39470506	+	NA	NA	NA	NA	NA	NA	NN	TT	CC	TT	CC	TT	TT	CC	TT	CC	CC	TT	CC	CC	CC	CC	CT	CC	CC	CC	CC	CC	TT	NN	CC	CC	CC	CC	TT	CC	NN	TT	TT	TT	CC	CC	CC	CC	TT
100032114|F|0-45:C>T-45:C>T	C/T	VU03	39619168	+	NA	NA	NA	NA	NA	NA	CC	CC	CC	CC	CC	CC	CC	CC	CC	CC	CC	CC	CC	CC	CC	CC	CC	CC	CC	CC	CC	CC	CC	CC	CC	CC	CC	CC	CC	CC	CC	CC	CC	CC	CC	CC	CC	CC	CC
35152785|F|0-35:G>A-35:G>A	G/A	VU03	39641357	+	NA	NA	NA	NA	NA	NA	GG	GG	AA	GG	GG	GG	GG	NN	GG	AA	GG	GG	AA	AA	AA	AA	GG	GG	AA	GG	NN	AA	GG	NN	GG	AA	GG	AA	GG	NN	NN	GG	GG	GG	NN	NN	GG	GG	NN
14084103|F|0-20:G>T-20:G>T	T/G	VU03	39759405	+	NA	NA	NA	NA	NA	NA	GG	GG	TT	TT	GG	TT	TT	GG	GG	NN	GG	TT	TT	TT	TT	TT	GT	GG	TT	GG	TT	GT	GG	GT	GG	TT	GG	TT	TT	TT	GG	TT	GT	GG	GG	GG	GG	GG	GG
14075827|F|0-11:T>A-11:T>A	T	VU03	39788689	+	NA	NA	NA	NA	NA	NA	TT	TT	TT	TT	TT	TT	TT	TT	TT	TT	TT	TT	TT	TT	TT	TT	TT	TT	TT	TT	TT	TT	TT	TT	TT	TT	TT	TT	TT	TT	TT	TT	TT	TT	TT	TT	TT	TT	TT
100012454|F|0-35:C>T-35:C>T	C	VU03	39939320	+	NA	NA	NA	NA	NA	NA	CC	CC	CC	CC	CC	CC	CC	CC	CC	CC	CC	CC	CC	CC	CC	CC	CC	CC	CC	CC	CC	CC	CC	NN	NN	CC	CC	CC	CC	CC	CC	NN	CC	CC	CC	NN	CC	CC	CC
14077498|F|0-26:G>A-26:G>A	A/G	VU03	40027675	+	NA	NA	NA	NA	NA	NA	GG	GG	AA	GG	AA	AA	GG	AA	GG	AA	GG	GG	AA	AA	AA	AA	AA	AA	AA	AA	AA	AA	AA	AA	GG	AA	AA	AA	GG	GG	AA	GG	GG	AA	GG	AA	AA	AA	AA
28497733|F|0-32:G>T-32:G>T	G/T	VU03	40027737	+	NA	NA	NA	NA	NA	NA	GG	GG	GG	GG	GG	GG	GG	GG	GG	GG	GG	GG	GG	GG	GG	GG	GG	GG	GG	GG	GG	GG	GG	GG	GG	GG	GG	GG	GG	GG	GG	GG	GG	GG	GG	GG	GG	GG	GG
25357465|F|0-12:G>A-12:G>A	G/A	VU03	40118646	+	NA	NA	NA	NA	NA	NA	GG	GG	GG	GG	GG	GG	GG	GG	GG	GG	GG	GG	GG	GG	GG	GG	GG	GG	GG	GG	GG	GG	GG	GG	GG	GG	GG	GG	GG	GG	GG	GG	GG	GG	GG	GG	GG	GG	GG
42215744|F|0-20:C>T-20:C>T	C/T	VU03	40257579	+	NA	NA	NA	NA	NA	NA	CC	CC	CC	CC	CT	CC	CC	CC	CT	CC	CT	CC	CC	CC	CC	CC	CC	CC	CC	CC	CC	CC	CT	CC	CT	CC	CT	CC	CC	CT	CC	CC	CC	CC	CT	CC	CC	CC	CT
14087866|F|0-14:T>C-14:T>C	T/C	VU03	40302905	+	NA	NA	NA	NA	NA	NA	TT	TT	TT	TT	NN	TT	TT	TT	TT	TT	TT	TT	TT	TT	NN	NN	TT	TT	TT	TT	TT	TT	TT	TT	TT	TT	TT	TT	TT	TT	TT	TT	TT	TT	TT	TT	TT	TT	TT
25366673|F|0-28:A>G-28:A>G	A/G	VU03	40302905	+	NA	NA	NA	NA	NA	NA	AA	AA	AA	AA	AA	AA	AA	AA	AA	AA	AA	AA	AA	AA	AA	AA	AA	AA	AA	AA	AA	AA	AA	AA	AA	AA	AA	AA	AA	AA	AA	AA	AA	AA	AA	NN	AA	AA	AA
25352978|F|0-64:A>T-64:A>T	A/T	VU03	40423724	+	NA	NA	NA	NA	NA	NA	AA	AA	AA	AA	TT	AA	AA	AA	AA	AA	AA	AA	AA	AA	AA	AA	AA	AA	AA	TT	AA	AA	AA	AA	NN	AA	AT	AA	AA	AA	AA	AA	AA	AA	AA	TT	NN	AA	AA
14087390|F|0-16:G>A-16:G>A	G/A	VU03	40471951	+	NA	NA	NA	NA	NA	NA	GG	GG	GG	GG	AG	GG	GG	GG	GG	GG	GG	GG	GG	GG	GG	GG	GG	GG	GG	AG	GG	GG	GG	GG	AG	GG	AG	GG	GG	GG	GG	GG	GG	GG	GG	AG	GG	GG	GG
14084162|F|0-6:C>T-6:C>T	C/T	VU03	40540412	+	NA	NA	NA	NA	NA	NA	NN	TT	CC	CC	NN	NN	CC	CC	CC	NN	CC	CC	CC	CC	CC	CC	CC	CC	CC	NN	CC	CC	CC	CC	NN	CC	CC	CC	CC	NN	CC	CC	CC	NN	CC	NN	TT	CC	CC
100059801|F|0-30:C>G-30:C>G	C/G	VU03	40542056	+	NA	NA	NA	NA	NA	NA	CC	CC	CC	CC	CC	CC	CC	CC	CC	CC	CC	CC	CC	CC	CC	CC	CC	CC	CC	NN	CC	CC	CC	CC	NN	CC	CC	CC	CC	CC	CC	CC	CC	NN	CC	NN	CC	CC	CC
100059801|F|0-41:G>C-41:G>C	G/C	VU03	40542056	+	NA	NA	NA	NA	NA	NA	GG	GG	GG	GG	GG	GG	GG	GC	GG	GG	GG	GG	GG	GG	GG	GG	GG	GG	GG	CC	GG	GG	GG	GG	CC	GG	GG	GG	GG	GG	GG	GG	GG	NN	GG	CC	GG	GG	GG
14055761|F|0-7:G>C-7:G>C	G/C	VU03	40542573	+	NA	NA	NA	NA	NA	NA	GG	GG	GG	GG	GG	GG	GG	GG	GG	GG	GG	GG	GG	GG	GG	GG	GG	GG	GG	CC	GG	GG	GG	GG	CC	GG	GG	GG	GG	GG	GG	GG	GG	GG	GG	CC	GG	GG	GG
25366652|F|0-63:G>T-63:G>T	T/G	VU03	40554954	+	NA	NA	NA	NA	NA	NA	TT	GG	TT	TT	NN	TT	TT	TT	TT	GG	TT	TT	TT	TT	TT	TT	GT	TT	GG	GG	TT	TT	TT	TT	NN	TT	TT	GG	TT	GG	TT	GG	TT	GG	TT	GG	GG	TT	TT
14078760|F|0-9:G>A-9:G>A	G/A	VU03	40557433	+	NA	NA	NA	NA	NA	NA	GG	AA	GG	GG	AA	GG	GG	GG	GG	AA	GG	GG	GG	GG	GG	GG	AG	GG	AA	AA	GG	GG	GG	GG	AA	GG	AG	AA	GG	AA	GG	AA	GG	AA	GG	AA	AA	GG	GG
14075193|F|0-9:C>G-9:C>G	C/G	VU03	40582693	+	NA	NA	NA	NA	NA	NA	CC	GG	CC	CC	CC	CC	CC	CC	CC	CC	GG	CC	CC	CC	CC	CC	CC	CC	CC	CC	CC	CC	CC	CC	CC	CC	CC	CC	CC	CC	CC	CC	CC	GG	CC	CC	GG	CC	CC
25354764|F|0-15:C>A-15:C>A	A/C	VU03	40582950	+	NA	NA	NA	NA	NA	NA	AA	CC	AA	AA	NN	CC	AA	AA	AA	CC	CC	AA	AA	AA	AA	AA	CC	AA	AA	NN	AA	AA	AA	AA	NN	AA	AA	AA	AA	CC	AA	CC	AA	CC	AA	NN	CC	AA	AA
14076613|F|0-27:T>C-27:T>C	T/C	VU03	40588985	+	NA	NA	NA	NA	NA	NA	TT	CC	TT	TT	NN	CC	TT	TT	TT	CC	CC	TT	TT	TT	TT	TT	CC	TT	TT	CT	TT	TT	TT	TT	TT	TT	TT	TT	TT	CT	TT	CC	TT	CC	TT	TT	CC	TT	TT
25354319|F|0-15:A>G-15:A>G	G/A	VU03	40592099	+	NA	NA	NA	NA	NA	NA	GG	AA	GG	GG	NN	AA	GG	GG	GG	AA	AA	GG	GG	GG	GG	GG	AA	GG	GG	NN	GG	GG	GG	GG	NN	GG	GG	GG	GG	AA	GG	AA	GG	AA	GG	NN	AA	GG	GG
35153420|F|0-33:A>T-33:A>T	T/A	VU03	40598603	+	NA	NA	NA	NA	NA	NA	TT	AA	TT	TT	AA	AA	TT	TT	TT	AA	AA	TT	TT	TT	TT	TT	AA	TT	TT	AA	TT	TT	TT	TT	AA	TT	TT	TT	TT	AA	TT	NN	TT	AA	TT	AA	AA	TT	TT
14079691|F|0-34:A>G-34:A>G	A/G	VU03	40612738	+	NA	NA	NA	NA	NA	NA	AA	GG	AA	AA	AA	AA	AA	AA	AA	AA	GG	AA	AA	AA	AA	AA	AA	AA	AA	AA	AA	AA	AA	AA	AA	AA	AA	AA	AA	AA	AA	AA	AA	GG	AA	AA	GG	AA	AA
14075741|F|0-33:C>G-33:C>G	C/G	VU03	40625753	+	NA	NA	NA	NA	NA	NA	CC	CC	CC	CC	CC	CC	CC	CC	CC	CC	CC	CC	CC	CC	CC	CC	CC	CC	CC	CC	CC	CC	CC	CC	GG	CC	CC	CC	CC	CC	CC	CC	CC	CC	CC	CC	CC	CC	CC
35153528|F|0-24:T>C-24:T>C	T/C	VU03	40760885	+	NA	NA	NA	NA	NA	NA	TT	TT	TT	TT	TT	TT	TT	TT	TT	TT	TT	TT	TT	TT	TT	TT	TT	TT	TT	TT	TT	TT	TT	TT	TT	TT	TT	TT	TT	TT	TT	TT	TT	CC	TT	TT	TT	TT	TT
14077320|F|0-67:C>T-67:C>T	C/T	VU03	40764437	+	NA	NA	NA	NA	NA	NA	TT	CC	CC	CC	TT	TT	CC	TT	CC	CC	CC	TT	CC	CC	CC	CC	CC	CC	CC	CC	CC	CT	CC	CT	CC	CC	CC	CC	CC	CC	CC	CT	TT	CC	CC	CC	CC	CC	CC
14084956|F|0-33:C>G-33:C>G	C/G	VU03	40815205	+	NA	NA	NA	NA	NA	NA	GG	CC	CC	CC	GG	GG	CC	GG	CC	CC	CC	GG	CC	CC	CC	CC	GC	CC	CC	CC	CC	GG	CC	GC	CC	CC	CC	CC	CC	CC	CC	CC	GG	GG	CC	CC	CC	CC	CC
14080268|F|0-33:C>G-33:C>G	C/G	VU03	40815271	+	NA	NA	NA	NA	NA	NA	GG	CC	CC	CC	GG	GG	CC	GG	CC	CC	CC	GG	CC	CC	CC	CC	GC	CC	CC	CC	CC	GC	CC	GC	CC	CC	CC	CC	CC	CC	CC	CC	GG	GG	CC	CC	CC	CC	CC
35153404|F|0-15:T>A-15:T>A	T/A	VU03	40842573	+	NA	NA	NA	NA	NA	NA	TT	TT	TT	TT	TT	TT	NN	TT	TT	TT	TT	TT	TT	TT	TT	TT	TT	TT	TT	TT	TT	NN	TT	TT	TT	TT	TT	TT	TT	NN	TT	TT	TT	NN	NN	NN	TT	TT	TT
14076668|F|0-23:G>C-23:G>C	G/C	VU03	40874073	+	NA	NA	NA	NA	NA	NA	CC	GG	GG	GG	CC	GG	GG	CC	GG	GG	GG	CC	GG	GG	GG	GG	GC	GG	GG	CC	GG	CC	GG	GC	CC	GG	GG	GG	GG	GG	GG	GG	CC	GG	CC	CC	GG	GG	GG
14075764|F|0-21:A>G-21:A>G	A/G	VU03	40928989	+	NA	NA	NA	NA	NA	NA	AA	AA	GG	AA	AA	AA	AA	AA	AA	AA	AA	GG	GG	GG	GG	GG	AG	AA	AA	AA	NN	GG	AA	AA	AA	GG	AA	AA	AA	AA	AA	AA	GG	NN	AA	AA	AA	AA	AA
25356666|F|0-23:C>T-23:C>T	T/C	VU03	40942752	+	NA	NA	NA	NA	NA	NA	TT	TT	CC	TT	TT	CC	TT	TT	TT	TT	TT	CC	CC	CC	CC	CC	CT	TT	TT	TT	CC	CC	TT	CT	TT	CC	TT	TT	TT	CT	TT	TT	CT	TT	TT	TT	CT	TT	TT
14082295|F|0-9:C>G-9:C>G	C/G	VU03	40959626	+	NA	NA	NA	NA	NA	NA	GC	GC	CC	GC	GC	CC	GC	GC	GC	GC	GC	CC	CC	CC	CC	CC	GC	GC	GC	GC	CC	CC	GC	GC	GC	CC	GC	GC	GC	GC	GC	GC	CC	GC	GC	GC	GC	GC	GC
14076487|F|0-27:G>A-27:G>A	G/A	VU03	40989162	+	NA	NA	NA	NA	NA	NA	GG	GG	AG	GG	GG	GG	NN	NN	GG	GG	GG	AG	AA	AG	GG	AA	GG	GG	GG	GG	AG	NN	GG	GG	NN	AG	GG	GG	NN	GG	GG	GG	AG	NN	NN	GG	GG	NN	GG
35154449|F|0-47:A>G-47:A>G	A/G	VU03	40995203	+	NA	NA	NA	NA	NA	NA	AA	AA	GG	AA	AA	GG	AA	AA	AA	AA	AA	GG	GG	GG	GG	GG	AG	AA	AA	NN	GG	GG	AA	AA	AA	GG	AA	AA	AA	AA	AA	AA	GG	AA	AA	NN	AA	AA	AA
14085597|F|0-6:A>C-6:A>C	A/C	VU03	41021559	+	NA	NA	NA	NA	NA	NA	AA	AA	CC	AA	AA	AA	AA	AA	AA	AA	AA	CC	CC	CC	CC	CC	AA	AA	AA	AA	CC	AA	AA	AA	AA	CC	AA	AA	AA	AA	AA	AA	CC	AA	AA	AA	AA	AA	AA
14080188|F|0-15:A>G-15:A>G	A/G	VU03	41021598	+	NA	NA	NA	NA	NA	NA	AA	AA	GG	AA	AA	GG	AA	AA	AA	AA	AA	GG	GG	GG	GG	GG	AG	AA	AA	AA	GG	GG	AA	AG	AA	GG	AA	AA	AA	AA	AA	AA	GG	AA	AA	AA	AA	AA	AA
25366404|F|0-5:A>C-5:A>C	C/A	VU03	41054703	+	NA	NA	NA	NA	NA	NA	CC	CC	AC	CC	CC	AC	CC	CC	CC	CC	CC	AC	AC	AC	AC	AC	AC	CC	CC	CC	AC	AC	CC	AC	CC	AC	CC	CC	CC	CC	CC	CC	AC	CC	CC	CC	CC	CC	CC
35152845|F|0-23:A>G-23:A>G	A/G	VU03	41062331	+	NA	NA	NA	NA	NA	NA	AA	AA	GG	AA	AA	AA	AA	AA	AA	AA	AA	GG	GG	GG	GG	AA	AA	AA	NN	AA	GG	AA	NN	AA	AA	GG	AA	AA	AA	AA	AA	AA	GG	AA	AA	NN	AA	NN	AA
25352853|F|0-64:G>T-64:G>T	G/T	VU03	41103684	+	NA	NA	NA	NA	NA	NA	GG	GG	GG	GG	GG	GG	GG	GG	GG	GG	GG	GG	GG	GG	GG	NN	GG	GG	GG	GG	GG	GG	GG	NN	GG	GG	GG	GG	GG	GG	GG	GG	GG	GG	GG	GG	GG	GG	GG
28497966|F|0-9:C>T-9:C>T	C/T	VU03	41104360	+	NA	NA	NA	NA	NA	NA	CC	CC	CC	CC	CC	CC	CC	CC	CC	CC	CC	CC	TT	CC	CC	NN	CC	CC	CC	CC	CC	CT	CC	CC	CC	CC	CC	CC	CC	CC	CC	CC	CC	CC	CC	CC	CC	CC	CC
35155132|F|0-45:G>C-45:G>C	C/G	VU03	41171253	+	NA	NA	NA	NA	NA	NA	GG	CC	NN	CC	CC	CC	CC	CC	CC	CC	GG	CC	CC	CC	CC	CC	NN	CC	CC	CC	CC	NN	CC	CC	CC	NN	NN	CC	NN	CC	CC	CC	CC	CC	GG	GG	NN	NN	CC
14084186|F|0-30:C>T-30:C>T	C/T	VU03	41171357	+	NA	NA	NA	NA	NA	NA	CC	CC	CC	CC	CC	CC	CC	CC	CC	CC	CC	CC	CC	CC	CC	CC	CC	CC	CC	CC	CC	CC	CC	CC	CC	CC	CC	CC	CC	CC	CC	CC	CC	CC	CC	CC	CC	CC	CC
14061848|F|0-30:G>A-30:G>A	G/A	VU03	41202632	+	NA	NA	NA	NA	NA	NA	GG	GG	GG	GG	GG	GG	GG	GG	GG	GG	GG	GG	AA	GG	GG	GG	GG	GG	GG	GG	GG	AG	GG	GG	GG	GG	GG	GG	GG	GG	GG	GG	GG	GG	GG	GG	GG	GG	GG
14056153|F|0-8:G>A-8:G>A	G/A	VU03	41318104	+	NA	NA	NA	NA	NA	NA	GG	GG	GG	GG	GG	GG	GG	GG	GG	GG	GG	NN	GG	GG	NN	GG	GG	GG	GG	GG	GG	GG	GG	GG	GG	GG	GG	GG	GG	GG	GG	NN	GG	GG	GG	GG	GG	GG	GG
14055940|F|0-40:T>A-40:T>A	T/A	VU03	41386835	+	NA	NA	NA	NA	NA	NA	TT	TT	TT	TT	TT	TT	TT	TT	TT	TT	TT	TT	TT	TT	TT	TT	TT	TT	TT	TT	TT	TT	TT	TT	TT	TT	TT	TT	TT	TT	TT	TT	TT	TT	TT	TT	TT	TT	TT
42215448|F|0-40:A>C-40:A>C	A/C	VU03	41396628	+	NA	NA	NA	NA	NA	NA	AA	AA	AA	AA	AA	AA	AA	AA	CC	AA	AA	AA	AA	AA	AA	AA	AA	AA	AA	AA	AA	NN	AA	AA	NN	AA	NN	AA	AA	NN	AA	AA	NN	NN	NN	NN	AA	NN	AA
14086013|F|0-49:G>A-49:G>A	A/G	VU03	41416513	+	NA	NA	NA	NA	NA	NA	GG	GG	AA	AA	AA	AA	AA	GG	NN	AA	AA	GG	AA	AA	AA	AA	AG	AA	AA	GG	AA	AA	AA	GG	GG	AA	AA	AA	AA	GG	AA	GG	GG	AA	GG	GG	AA	AA	GG
100047486|F|0-8:C>T-8:C>T	C/T	VU03	41458992	+	NA	NA	NA	NA	NA	NA	CC	CC	CC	CC	CC	CC	CC	CC	CC	CC	CC	CC	CC	CC	CC	CC	CC	CC	CC	NN	CC	CC	CC	CC	NN	CC	CC	CC	NN	CC	NN	CC	CC	NN	CC	NN	CC	CC	CC
14075846|F|0-5:A>C-5:A>C	A/C	VU03	41459412	+	NA	NA	NA	NA	NA	NA	CC	CC	AA	CC	AA	AA	CC	CC	AA	AA	AA	AC	AA	AA	AA	AA	AC	AA	AA	CC	AA	AA	AA	CC	CC	AA	AA	AA	AA	CC	AA	CC	CC	AA	CC	CC	AA	AA	CC
14058763|F|0-10:T>C-10:T>C	T/C	VU03	41482127	+	NA	NA	NA	NA	NA	NA	NN	TT	TT	TT	TT	TT	TT	TT	TT	TT	TT	TT	CC	TT	TT	TT	TT	TT	TT	TT	TT	TT	TT	TT	TT	TT	TT	TT	TT	TT	TT	TT	TT	TT	TT	TT	TT	TT	TT
14073642|F|0-64:A>G-64:A>G	A/G	VU03	41667738	+	NA	NA	NA	NA	NA	NA	AA	AA	AA	AA	AA	AA	AA	AA	GG	AA	AA	AA	AA	AA	AA	AA	AA	AA	AA	AA	AA	AA	AA	AA	AA	AA	AA	AA	AA	AA	AA	AA	AA	AA	AA	AA	AA	AA	AA
14085100|F|0-64:T>C-64:T>C	C/T	VU03	41667804	+	NA	NA	NA	NA	NA	NA	CC	TT	CC	CC	TT	CC	CC	TT	CC	CC	CC	CC	CC	CC	CC	CC	CC	CC	CC	TT	CC	CC	CC	CC	CC	CC	CC	CC	CC	CC	CC	CC	CC	CC	TT	TT	CC	CC	TT
14082842|F|0-11:G>A-11:G>A	A/G	VU03	41756380	+	NA	NA	NA	NA	NA	NA	AA	AA	AA	GG	AA	AA	GG	AA	NN	AA	AA	AA	AA	AA	AA	AA	AA	AA	GG	NN	AA	AA	AA	AA	AA	GG	AA	GG	AA	NN	AA	AA	AA	AA	AA	NN	AA	AA	AA
14081747|F|0-17:T>G-17:T>G	G/T	VU03	41778994	+	NA	NA	NA	NA	NA	NA	GG	TT	GG	TT	TT	GG	TT	TT	TT	GG	GG	GG	GG	GG	GG	GG	GG	TT	GT	GT	GG	GG	GG	GG	GG	TT	GT	TT	GG	GG	GG	GG	GG	GG	TT	TT	GG	TT	TT
28497625|F|0-47:G>A-47:G>A	G/A	VU03	41802868	+	NA	NA	NA	NA	NA	NA	GG	AA	GG	AA	AA	GG	AA	AA	AA	GG	GG	GG	GG	GG	GG	GG	GG	AA	AA	AA	GG	GG	GG	GG	GG	AA	AG	AA	GG	GG	GG	GG	GG	GG	AA	NN	GG	NN	AA
35152943|F|0-20:G>C-20:G>C	G/C	VU03	41802934	+	NA	NA	NA	NA	NA	NA	GG	CC	GG	CC	CC	GG	CC	CC	CC	GG	GG	GG	GG	GG	GG	GG	GG	CC	CC	CC	NN	NN	GG	GG	GG	CC	GC	CC	GG	GG	GG	GG	GG	GG	CC	CC	GG	CC	CC
25353549|F|0-39:G>C-39:G>C	G/C	VU03	41809089	+	NA	NA	NA	NA	NA	NA	GG	GG	GG	GG	GG	GG	GG	GG	GG	GG	GG	GG	GG	GG	GG	GG	GG	GG	GG	GG	GG	GG	GG	GG	GG	GG	GG	GG	GG	GG	GG	GG	GG	GG	GG	NN	GG	GG	GG
14056319|F|0-12:G>A-12:G>A	G/A	VU03	41840487	+	NA	NA	NA	NA	NA	NA	GG	GG	GG	GG	GG	GG	GG	GG	GG	GG	GG	GG	GG	GG	GG	GG	GG	GG	GG	GG	GG	GG	GG	GG	GG	GG	GG	GG	GG	GG	GG	GG	GG	GG	GG	GG	GG	GG	GG
25363790|F|0-57:T>G-57:T>G	T	VU03	41917353	+	NA	NA	NA	NA	NA	NA	TT	TT	TT	TT	TT	TT	TT	TT	TT	TT	TT	TT	TT	TT	TT	TT	TT	TT	TT	TT	TT	TT	TT	TT	TT	TT	TT	TT	TT	TT	TT	TT	TT	TT	TT	TT	TT	TT	TT
25353655|F|0-42:T>G-42:T>G	T/G	VU03	41919308	+	NA	NA	NA	NA	NA	NA	TT	TT	TT	TT	TT	TT	TT	TT	TT	TT	TT	TT	TT	TT	TT	TT	TT	TT	TT	TT	TT	TT	TT	TT	TT	TT	TT	TT	TT	TT	TT	TT	TT	TT	TT	TT	TT	TT	TT
14083950|F|0-15:T>C-15:T>C	T/C	VU03	41923067	+	NA	NA	NA	NA	NA	NA	TT	CC	TT	CC	CC	TT	CC	CC	CC	TT	CC	CC	TT	TT	TT	CC	TT	TT	CC	CC	TT	CT	TT	CT	TT	CC	TT	CC	CC	CC	TT	CC	CC	TT	TT	CC	TT	CC	CC
14057635|F|0-7:C>T-7:C>T	C	VU03	42092839	+	NA	NA	NA	NA	NA	NA	CC	CC	CC	CC	CC	CC	CC	CC	CC	CC	CC	CC	CC	CC	CC	CC	CC	CC	CC	CC	CC	CC	CC	CC	CC	CC	CC	CC	CC	CC	CC	CC	CC	CC	CC	CC	CC	CC	CC
35155174|F|0-50:A>T-50:A>T	T/A	VU03	42137677	+	NA	NA	NA	NA	NA	NA	NN	TT	AA	TT	NN	AA	TT	NN	TT	TT	AA	TT	TT	NN	TT	NN	TT	AA	NN	NN	TT	TT	TT	AT	AT	TT	AA	TT	TT	TT	AA	TT	TT	AA	AT	TT	TT	TT	TT
14079895|F|0-46:T>A-46:T>A	A/T	VU03	42138009	+	NA	NA	NA	NA	NA	NA	AA	AA	AA	AA	AA	AA	AA	AA	AA	AA	AA	AA	AA	AA	AA	AA	AA	AA	AA	AA	AA	AA	AA	AA	AA	AA	AA	AA	AA	AA	AA	AA	AA	AA	TT	AA	AA	AA	AA
25365751|F|0-15:G>A-15:G>A	A/G	VU03	42172087	+	NA	NA	NA	NA	NA	NA	AA	AA	AA	AA	AA	AA	AA	AA	AA	AA	AA	AA	AA	AA	AA	AA	AA	AA	AA	AA	AA	AA	AA	AA	AA	AA	AA	AA	AA	AA	AA	AA	AA	AA	AA	AA	AA	AA	AA
14079607|F|0-14:T>A-14:T>A	A/T	VU03	42193313	+	NA	NA	NA	NA	NA	NA	AA	AA	AA	AA	AA	AA	AA	AA	AA	AA	AA	AA	AA	AA	AA	AA	AA	AA	AA	AA	AA	AA	AA	AA	AA	AA	AA	AA	AA	AA	AA	AA	AA	AA	TT	AA	AA	AA	AA
25363160|F|0-15:T>C-15:T>C	C/T	VU03	42199184	+	NA	NA	NA	NA	NA	NA	CC	CC	CC	CC	CC	CC	CC	CC	CC	CC	CC	CC	CC	CC	CC	CC	NN	CC	CC	CC	CT	CC	CC	NN	CC	CC	CC	CC	CC	CC	NN	CC	CC	CC	CC	CC	CC	CC	CC
14076135|F|0-62:C>G-62:C>G	C/G	VU03	42228726	+	NA	NA	NA	NA	NA	NA	CC	CC	CC	CC	CC	CC	CC	CC	CC	CC	CC	CC	CC	CC	CC	CC	CC	CC	CC	CC	CC	CC	CC	CC	CC	CC	CC	CC	CC	CC	CC	CC	CC	CC	GG	CC	CC	CC	CC
42215353|F|0-22:A>T-22:A>T	A/T	VU03	42278332	+	NA	NA	NA	NA	NA	NA	AA	AA	AA	AA	AA	AA	AA	AA	AA	AA	AA	AA	AA	AA	AA	AA	AA	AA	AA	AA	AA	AA	AA	AA	AA	AA	AA	NN	AA	AA	AA	AA	NN	AA	AA	AA	AA	AA	AA
35153072|F|0-23:C>T-23:C>T	C/T	VU03	42298027	+	NA	NA	NA	NA	NA	NA	CC	CC	CC	CC	CC	CC	CC	CC	CC	CC	CC	TT	CC	CC	CC	CC	CC	CC	CC	CC	CC	CC	CC	CC	CC	CC	CC	NN	CC	TT	CC	CC	TT	CC	CC	CC	CC	CC	CC
14081607|F|0-38:T>C-38:T>C	C/T	VU03	42448986	+	NA	NA	NA	NA	NA	NA	CC	CC	CC	CC	CC	CC	CC	CC	CC	CC	CC	CC	CC	CC	CC	CC	CC	CC	CC	CC	CC	CC	CC	CC	CC	CC	CC	CC	CC	CC	CC	CC	CC	CC	TT	CC	CC	CC	CC
14058029|F|0-17:T>A-17:T>A	T/A	VU03	42464374	+	NA	NA	NA	NA	NA	NA	TT	TT	TT	TT	TT	TT	TT	TT	TT	TT	TT	TT	TT	TT	TT	TT	TT	TT	TT	TT	TT	TT	TT	TT	TT	TT	TT	TT	TT	TT	TT	TT	TT	TT	TT	TT	TT	TT	TT
14075231|F|0-52:C>T-52:C>T	C/T	VU03	42464831	+	NA	NA	NA	NA	NA	NA	CC	CC	CC	CC	CC	CC	CC	CC	CC	CC	CC	CC	CC	CC	CC	CC	CC	CC	CC	CC	CC	CC	CC	CC	CC	CC	CC	CC	CC	CC	CC	CC	CC	CC	TT	CC	CC	CC	CC
14081634|F|0-37:A>G-37:A>G	A/G	VU03	42473065	+	NA	NA	NA	NA	NA	NA	AA	AA	AA	AA	AA	AA	AA	AA	AA	AA	AA	AA	AA	AA	AA	AA	AA	AA	AA	AA	AA	AA	AA	AA	AA	AA	AA	AA	AA	AA	AA	AA	AA	AA	GG	AA	AA	AA	AA
14076109|F|0-41:A>C-41:A>C	A/C	VU03	42483642	+	NA	NA	NA	NA	NA	NA	CC	AA	AA	AA	CC	CC	AA	CC	AA	AA	AA	AA	AA	AA	AA	AA	CC	AC	AA	CC	AA	AA	CC	AC	CC	AA	AC	AA	AA	AA	AA	AA	AA	AA	AA	CC	CC	AA	AA
14075567|F|0-54:T>C-54:T>C	C/T	VU03	42483708	+	NA	NA	NA	NA	NA	NA	CC	CC	CC	CC	CC	CC	CC	CC	CC	CC	CC	CC	CC	CC	CC	CC	CC	CC	CC	CC	CC	CC	CC	CC	CC	CC	CC	CC	CC	CC	CC	NN	CC	NN	TT	NN	CC	CC	CC
14081677|F|0-22:C>T-22:C>T	C/T	VU03	42490113	+	NA	NA	NA	NA	NA	NA	TT	CC	CC	CC	TT	TT	CC	TT	CC	CC	CC	CC	CC	CC	CC	CC	TT	CC	CC	TT	CC	CC	TT	CT	TT	CC	CT	CC	CC	CC	CC	CC	CC	CC	CC	TT	TT	CC	CC
14061237|F|0-43:C>T-43:C>T	C/T	VU03	42534007	+	NA	NA	NA	NA	NA	NA	CC	CC	CC	CC	CC	CC	CC	CT	CC	CC	CC	CC	CC	CC	CC	CC	CC	CC	CC	CC	CC	CC	CC	CC	CC	CC	CC	CC	CC	CC	CC	CC	CC	CC	CC	CC	CC	CC	CC
14086240|F|0-25:T>C-25:T>C	C/T	VU03	42551280	+	NA	NA	NA	NA	NA	NA	TT	TT	CC	CC	TT	TT	CC	TT	TT	CC	CC	CC	CC	CC	CC	CC	TT	TT	CC	TT	CC	CT	TT	CT	TT	CC	TT	CC	CC	CC	TT	CC	CC	TT	TT	TT	TT	TT	TT
14080246|F|0-36:G>A-36:G>A	G	VU03	42610892	+	NA	NA	NA	NA	NA	NA	GG	GG	GG	GG	GG	GG	GG	GG	GG	GG	GG	GG	GG	GG	GG	GG	GG	GG	GG	GG	GG	GG	GG	GG	GG	GG	GG	GG	GG	GG	GG	GG	GG	GG	GG	GG	GG	GG	GG
42215318|F|0-35:A>T-35:A>T	A/T	VU03	42663147	+	NA	NA	NA	NA	NA	NA	AA	AA	AA	TT	AA	AA	TT	AA	AA	AA	AA	TT	AA	AA	AA	AA	AA	AA	TT	AA	AA	NN	AA	AA	AA	NN	AA	AA	TT	TT	AA	TT	TT	AA	AA	AA	AA	AA	AA
100008197|F|0-42:A>G-42:A>G	G	VU03	42678288	+	NA	NA	NA	NA	NA	NA	GG	GG	GG	GG	GG	GG	GG	GG	GG	NN	GG	GG	GG	GG	GG	GG	GG	GG	GG	GG	GG	GG	NN	GG	GG	NN	NN	GG	GG	NN	GG	GG	GG	GG	GG	NN	GG	NN	GG
14076083|F|0-5:T>G-5:T>G	G/T	VU03	42698517	+	NA	NA	NA	NA	NA	NA	GG	GG	GG	GG	GG	GG	GG	GT	GG	GG	GG	GG	GG	GG	GG	GG	GG	GG	GG	GG	GG	GG	GG	GG	GG	GG	GG	GG	GG	GG	GG	GG	GG	GG	GG	GG	GG	GG	GG
42215517|F|0-41:G>A-41:G>A	G	VU03	42778197	+	NA	NA	NA	NA	NA	NA	GG	GG	GG	GG	GG	GG	GG	GG	GG	GG	GG	GG	GG	GG	GG	GG	GG	GG	GG	GG	GG	GG	GG	GG	GG	GG	GG	GG	GG	GG	GG	GG	GG	GG	GG	GG	GG	GG	GG
14077293|F|0-21:G>A-21:G>A	G/A	VU03	42918646	+	NA	NA	NA	NA	NA	NA	GG	AA	AA	GG	GG	GG	GG	GG	AA	AA	AA	GG	AA	AA	GG	AA	GG	GG	GG	GG	AA	AA	GG	GG	GG	GG	GG	AA	GG	AG	GG	GG	GG	GG	GG	GG	GG	GG	AA
35153751|F|0-50:G>C-50:G>C	G/C	VU03	42919617	+	NA	NA	NA	NA	NA	NA	GG	CC	GG	GG	GG	GG	NN	GG	CC	NN	GG	GG	GG	GG	GG	NN	NN	GG	NN	GG	NN	GG	GG	GG	GG	NN	GG	NN	GG	GG	NN	GG	GG	GG	GG	NN	GG	GG	CC
14084778|F|0-43:G>A-43:G>A	G/A	VU03	42946037	+	NA	NA	NA	NA	NA	NA	GG	AA	GG	GG	GG	GG	GG	GG	AA	GG	GG	GG	GG	GG	GG	GG	GG	GG	GG	GG	GG	GG	GG	GG	GG	GG	GG	GG	GG	GG	GG	GG	GG	GG	GG	GG	GG	GG	AA
35153491|F|0-33:T>C-33:T>C	C/T	VU03	43133397	+	NA	NA	NA	NA	NA	NA	CC	TT	CC	CC	CC	CC	CC	CC	TT	CC	CC	CC	CC	CC	CC	CC	CC	CC	CC	CC	CC	CC	NN	NN	CC	CC	CC	NN	NN	CC	NN	CC	CC	NN	CC	NN	CC	NN	TT
14081891|F|0-13:C>G-13:C>G	C/G	VU03	43177219	+	NA	NA	NA	NA	NA	NA	CC	GG	CC	CC	CC	CC	CC	NN	GG	CC	CC	CC	NN	CC	CC	CC	GC	CC	CC	CC	CC	CC	CC	CC	CC	CC	CC	CC	CC	CC	CC	CC	NN	CC	CC	NN	CC	NN	GG
14078948|F|0-20:C>T-20:C>T	C/T	VU03	43216090	+	NA	NA	NA	NA	NA	NA	CT	TT	CC	CC	CC	CC	CC	CC	TT	CC	CC	CC	CC	CC	CC	CC	CC	CC	CC	CC	CC	CC	CT	CC	CC	CC	CC	CC	CC	CC	CC	CC	CC	CC	CC	CC	CC	CC	TT
28497024|F|0-20:A>C-20:A>C	A/C	VU03	43250273	+	NA	NA	NA	NA	NA	NA	AA	AA	AA	AA	AA	AA	AA	AA	AA	AA	AA	AA	AA	AA	AA	AA	AC	AA	AA	AA	AA	AA	AA	AA	AA	AA	AA	AA	AA	AA	AA	AA	AA	AA	AA	AA	AA	AA	AA
25364740|F|0-35:A>G-35:A>G	G/A	VU03	43300693	+	NA	NA	NA	NA	NA	NA	GG	AG	AA	GG	GG	AA	GG	GG	GG	AA	AA	GG	AA	AA	GG	AA	GG	GG	GG	AG	AA	AG	GG	GG	GG	GG	GG	AA	GG	GG	GG	GG	GG	GG	GG	GG	GG	GG	GG
42774740|F|0-13:C>G-13:C>G	C/G	VU03	43339413	+	NA	NA	NA	NA	NA	NA	CC	CC	CC	CC	CC	CC	CC	CC	GG	CC	CC	CC	CC	CC	CC	CC	NN	CC	CC	CC	CC	CC	CC	CC	CC	CC	CC	CC	CC	CC	CC	CC	CC	CC	CC	NN	CC	CC	NN
25355449|F|0-37:C>T-37:C>T	C/T	VU03	43339479	+	NA	NA	NA	NA	NA	NA	CC	TT	CC	CC	CC	CC	CC	CC	CC	CC	CC	CC	CC	CC	CC	CC	CC	CC	CC	CC	CC	CC	CC	CC	CC	CC	CC	CC	CC	CC	CC	CC	CC	CC	CC	CC	CC	CC	TT
42215329|F|0-50:T>C-50:T>C	T/C	VU03	43485565	+	NA	NA	NA	NA	NA	NA	TT	TT	TT	TT	TT	TT	TT	TT	CC	TT	TT	TT	TT	TT	TT	NN	NN	TT	NN	TT	TT	NN	TT	TT	NN	TT	NN	TT	NN	NN	TT	TT	NN	TT	TT	TT	NN	TT	TT
14059230|F|0-51:T>G-51:T>G	T/G	VU03	43679805	+	NA	NA	NA	NA	NA	NA	TT	NN	TT	TT	TT	GG	TT	TT	TT	TT	TT	TT	TT	TT	TT	TT	TT	TT	GT	TT	TT	TT	TT	TT	TT	TT	TT	TT	TT	TT	TT	TT	TT	TT	TT	TT	TT	TT	TT
14073410|F|0-68:A>G-68:A>G	A/G	VU03	44005267	+	NA	NA	NA	NA	NA	NA	AA	GG	AA	AA	AA	AA	AA	AA	AA	AA	AA	AA	AA	AA	AA	AA	AG	AG	AA	AA	AA	AA	AA	AA	AA	AA	AA	AA	AA	AA	AA	AA	AA	AA	AA	AA	AA	AA	AA
14076880|F|0-29:T>G-29:T>G	T/G	VU03	44156361	+	NA	NA	NA	NA	NA	NA	TT	GG	TT	TT	TT	TT	TT	TT	TT	TT	TT	TT	TT	TT	TT	TT	TT	TT	GT	TT	TT	TT	TT	TT	TT	TT	TT	TT	TT	TT	TT	TT	TT	TT	TT	TT	TT	TT	TT
28201733|F|0-44:A>G-44:A>G	A/G	VU03	44189725	+	NA	NA	NA	NA	NA	NA	AA	NN	AA	NN	AA	AA	NN	AA	AA	AA	AA	NN	AA	AA	AA	AA	AG	AA	NN	AA	AA	AA	AA	AA	AA	NN	AA	AA	NN	NN	AA	NN	NN	AA	AA	NN	AA	AA	AA
14076535|F|0-65:A>G-65:A>G	A/G	VU03	44325932	+	NA	NA	NA	NA	NA	NA	AA	GG	AA	AA	AA	AA	AA	AA	AA	AA	AA	AA	AA	AA	AA	AA	AA	AA	AA	AA	AA	AA	AA	AA	AA	AA	AA	AA	AA	AA	AA	AA	AA	AA	AA	NN	AA	AA	AA
14087652|F|0-20:G>C-20:G>C	G/C	VU03	44336844	+	NA	NA	NA	NA	NA	NA	GG	GG	GG	CC	GG	GG	CC	GG	GG	GG	GG	CC	GG	GG	CC	GG	GG	GG	CC	GG	GG	GG	GG	GG	GG	CC	GG	GG	CC	GC	GG	CC	CC	GG	GG	GG	GG	GG	GG
14055252|F|0-7:T>C-7:T>C	T/C	VU03	44455387	+	NA	NA	NA	NA	NA	NA	TT	TT	TT	TT	TT	TT	TT	TT	TT	TT	TT	TT	TT	TT	TT	TT	CT	TT	TT	NN	TT	TT	TT	TT	TT	TT	TT	TT	TT	TT	TT	TT	TT	TT	TT	NN	TT	TT	TT
14074224|F|0-11:G>C-11:G>C	G/C	VU03	44466270	+	NA	NA	NA	NA	NA	NA	GG	GG	GG	GG	GG	GG	GG	GG	GG	GG	GG	GG	GG	GG	GG	GG	GC	GG	GG	GG	GG	GG	GG	GG	GG	GG	GG	GG	GG	GG	GG	GG	GG	GG	GG	GG	GG	GG	GG
42215846|F|0-36:A>C-36:A>C	A/C	VU03	44510203	+	NA	NA	NA	NA	NA	NA	AA	AA	AA	AA	NN	AA	AA	AA	AA	AA	AA	AA	AA	AA	AA	AA	AC	AA	AA	NN	AA	AA	AA	AA	AA	AA	AA	AA	AA	AA	AA	NN	AA	AA	AA	NN	AA	AA	AA
14054826|F|0-40:G>A-40:G>A	G/A	VU03	44524860	+	NA	NA	NA	NA	NA	NA	GG	GG	GG	GG	AA	GG	GG	GG	GG	GG	GG	GG	GG	GG	GG	GG	AG	GG	GG	AA	GG	GG	GG	GG	GG	GG	GG	GG	GG	GG	GG	GG	GG	GG	GG	AA	GG	GG	GG
25356795|F|0-33:A>G-33:A>G	A/G	VU03	44535931	+	NA	NA	NA	NA	NA	NA	AA	AA	AA	AA	GG	AA	AA	AA	AA	AA	AA	AA	AA	AA	AA	AA	AA	AA	AA	GG	AA	AA	AA	AA	AA	AA	AA	AA	AA	AA	AA	AA	AA	AA	AA	GG	AA	AA	AA
14059780|F|0-37:A>G-37:A>G	A/G	VU03	44558024	+	NA	NA	NA	NA	NA	NA	AA	AA	AA	AA	NN	AA	AA	AA	AA	AA	AA	AA	AA	AA	AA	AA	AG	AA	AA	AG	AA	AA	AA	AA	AA	AA	AA	AA	AA	AA	AA	AA	AA	AA	AA	GG	AA	AA	AA
25363574|F|0-48:C>G-48:C>G	C/G	VU03	44563892	+	NA	NA	NA	NA	NA	NA	CC	CC	CC	CC	GG	CC	CC	CC	CC	CC	CC	CC	CC	CC	CC	CC	GC	CC	CC	GG	CC	CC	CC	CC	CC	CC	CC	CC	CC	CC	CC	CC	CC	CC	CC	GG	CC	CC	CC
35153766|F|0-43:T>C-43:T>C	C/T	VU03	44581235	+	NA	NA	NA	NA	NA	NA	NN	CC	CC	CC	NN	CC	CC	CC	CC	CC	CC	CC	CC	CC	CC	CC	CC	CT	CC	CC	CC	CC	CC	CC	NN	CC	CC	CC	CC	NN	CC	CC	CC	NN	CC	NN	CC	CC	NN
14073673|F|0-24:G>C-24:G>C	G/C	VU03	44611176	+	NA	NA	NA	NA	NA	NA	GG	GG	GG	GG	GG	GG	GG	GG	GG	GG	GG	GG	GG	GG	GG	GG	GC	GG	GG	GG	GG	GG	GG	GG	GG	GG	GG	GG	GG	GG	GG	GG	GC	GG	GG	GG	GG	GG	GG
25356731|F|0-6:G>T-6:G>T	G/T	VU03	44650369	+	NA	NA	NA	NA	NA	NA	GG	GG	GG	GG	GG	GG	GG	GG	GG	GG	GG	GG	GG	GG	GG	GG	GG	GG	GG	GG	GG	GG	GG	GT	GG	GG	GG	GG	GG	GG	GG	GG	GG	GG	GG	GG	GG	GG	GG
42215446|F|0-20:T>A-20:T>A	T/A	VU03	44768203	+	NA	NA	NA	NA	NA	NA	TT	TT	TT	TT	AA	TT	TT	TT	TT	TT	TT	TT	TT	TT	TT	TT	TT	TT	TT	AA	TT	TT	TT	TT	TT	TT	TT	TT	TT	TT	TT	TT	TT	NN	TT	AA	TT	TT	TT
25364225|F|0-16:T>C-16:T>C	T/C	VU03	44768269	+	NA	NA	NA	NA	NA	NA	TT	TT	TT	TT	NN	TT	TT	TT	TT	TT	TT	TT	TT	TT	TT	TT	TT	TT	TT	TT	TT	TT	TT	TT	TT	TT	TT	TT	TT	TT	TT	TT	TT	TT	TT	NN	TT	CC	TT
25364225|F|0-66:T>C-66:T>C	T/C	VU03	44768269	+	NA	NA	NA	NA	NA	NA	TT	TT	TT	TT	CC	TT	TT	TT	TT	TT	TT	TT	TT	TT	TT	TT	TT	TT	TT	CT	TT	TT	TT	TT	TT	TT	TT	TT	TT	TT	TT	TT	TT	TT	TT	CC	TT	NN	TT
14057829|F|0-19:G>A-19:G>A	G/A	VU03	44784007	+	NA	NA	NA	NA	NA	NA	NN	GG	GG	GG	NN	GG	GG	NN	GG	GG	GG	GG	GG	GG	GG	GG	GG	GG	GG	NN	GG	GG	GG	GG	GG	GG	GG	GG	GG	GG	GG	GG	GG	GG	GG	NN	GG	GG	GG
14057829|F|0-9:C>T-9:C>T	C/T	VU03	44784007	+	NA	NA	NA	NA	NA	NA	TT	CC	CC	CC	TT	CC	CC	NN	CC	CC	CC	CC	CC	CC	CC	CC	CC	CC	CC	TT	CC	CC	CC	CC	CC	CC	CC	CC	CC	CC	CC	CC	CC	CC	CC	TT	CC	CC	CC
14075509|F|0-38:G>A-38:G>A	G/A	VU03	44865323	+	NA	NA	NA	NA	NA	NA	NN	GG	GG	GG	NN	GG	GG	NN	GG	GG	GG	GG	GG	GG	GG	GG	GG	GG	GG	NN	GG	GG	GG	GG	GG	GG	GG	GG	GG	GG	GG	GG	GG	GG	GG	NN	GG	NN	GG
14075509|F|0-57:A>T-57:A>T	A/T	VU03	44865323	+	NA	NA	NA	NA	NA	NA	TT	AA	AA	AA	TT	AA	AA	NN	AA	AA	AA	AA	AA	AA	AA	AA	AA	AA	AA	TT	AA	AA	AA	AA	AA	AA	AT	AA	AA	AA	AA	AA	AA	AA	AA	TT	AA	NN	AA
14082438|F|0-6:T>A-6:T>A	T/A	VU03	44865389	+	NA	NA	NA	NA	NA	NA	AA	TT	TT	TT	AA	TT	TT	AA	TT	TT	TT	TT	TT	TT	TT	TT	TT	TT	TT	AA	TT	TT	TT	TT	TT	TT	AT	TT	TT	TT	TT	TT	TT	TT	TT	AA	TT	TT	TT
25357025|F|0-28:G>C-28:G>C	G/C	VU03	44913406	+	NA	NA	NA	NA	NA	NA	CC	GG	GG	GG	CC	GG	GG	CC	GG	GG	GG	GG	GG	GG	GG	GG	GG	GG	GG	CC	GG	GG	GG	GG	GG	GG	GC	GG	GG	GG	GG	GG	GG	GG	GG	CC	GG	GG	GG
14075288|F|0-25:A>G-25:A>G	A/G	VU03	45073448	+	NA	NA	NA	NA	NA	NA	AA	AA	GG	AA	AA	AA	AA	AA	AA	AA	GG	GG	GG	GG	AA	AA	AA	AA	AA	AA	GG	AG	AA	AG	AA	GG	AA	GG	GG	GG	AA	AA	GG	AA	AA	AA	AA	AA	AA
42215475|F|0-28:T>C-28:T>C	T/C	VU03	45096567	+	NA	NA	NA	NA	NA	NA	CC	TT	TT	TT	CC	TT	TT	CC	TT	TT	TT	TT	TT	TT	NN	TT	TT	NN	TT	CC	TT	TT	TT	TT	NN	NN	NN	TT	NN	TT	TT	TT	TT	NN	TT	NN	NN	NN	TT
14075428|F|0-46:G>C-46:G>C	G/C	VU03	45096678	+	NA	NA	NA	NA	NA	NA	CC	GG	GG	GG	CC	GG	GG	CC	GG	GG	GG	GG	GG	GG	GG	GG	GG	GG	GG	CC	GG	GG	GG	GG	GG	GG	GC	GG	GG	GG	GG	GG	GG	GG	GG	CC	GG	GG	GG
14083598|F|0-5:A>G-5:A>G	G/A	VU03	45189370	+	NA	NA	NA	NA	NA	NA	GG	AA	GG	GG	GG	AA	GG	GG	AA	AA	GG	AA	GG	GG	AA	AA	AA	AA	GG	GG	GG	GG	AA	AG	AA	AA	AG	GG	AA	AA	AA	GG	AA	AA	AA	GG	AA	AA	AA
35153359|F|0-7:A>G-7:A>G	A/G	VU03	45305760	+	NA	NA	NA	NA	NA	NA	AA	AA	AA	AA	AA	AA	AA	AA	AA	AA	AA	AA	AA	AA	AA	AA	AA	AA	AA	AA	AA	AA	AA	AA	AA	AA	AA	AA	AA	AG	AA	AA	AA	AA	AA	AA	AA	AA	AA
42215376|F|0-39:T>A-39:T>A	T/A	VU03	45305826	+	NA	NA	NA	NA	NA	NA	AA	TT	TT	TT	AA	TT	TT	AA	TT	TT	TT	TT	TT	TT	TT	TT	TT	TT	TT	AA	TT	NN	TT	TT	TT	TT	AT	TT	TT	TT	TT	TT	TT	TT	TT	NN	TT	AA	TT
25354954|F|0-16:C>T-16:C>T	C/T	VU03	45327649	+	NA	NA	NA	NA	NA	NA	CC	CC	CC	CC	CC	CC	CC	CC	CC	CC	CC	CC	CC	CC	CC	CC	CC	CC	CC	CC	CC	CC	CC	CC	CC	CC	CC	CC	CC	CC	CC	CC	CC	CC	CC	CC	CC	CC	CC
28497355|F|0-17:G>C-17:G>C	G/C	VU03	45363364	+	NA	NA	NA	NA	NA	NA	GG	GG	GG	GG	GG	GG	GG	GG	GG	CC	GG	GG	GG	GG	CC	CC	GG	GG	GG	GG	GG	GG	GG	GG	GG	GG	GG	GG	GG	GG	GG	GG	GG	GG	GG	GG	GG	CC	GG
14079230|F|0-11:A>T-11:A>T	A/T	VU03	45387792	+	NA	NA	NA	NA	NA	NA	TT	AA	AA	AA	TT	AA	AA	TT	AA	AA	AA	AA	AA	AA	AA	AA	AA	AA	AA	TT	AA	AA	AA	AA	AA	AA	AT	AA	AA	AA	AA	AA	AA	AA	AA	TT	AA	AA	AA
14075980|F|0-7:A>G-7:A>G	A/G	VU03	45452783	+	NA	NA	NA	NA	NA	NA	GG	AA	AA	AA	AG	AA	AA	GG	AA	AA	AA	AA	AA	AA	AA	AA	AA	AA	AA	GG	AA	AA	AA	AA	AA	AA	AG	AA	AA	AA	AA	AA	AA	AA	AA	GG	AA	AA	AA
14075512|F|0-8:G>A-8:G>A	A/G	VU03	45474765	+	NA	NA	NA	NA	NA	NA	GG	GG	AA	AA	GG	GG	AA	GG	GG	GG	AA	AA	AA	AA	GG	GG	GG	GG	AA	GG	AA	AG	GG	AG	GG	AA	GG	AA	AA	AG	GG	AA	AA	GG	GG	GG	GG	GG	GG
25353752|F|0-25:C>T-25:C>T	C/T	VU03	45527415	+	NA	NA	NA	NA	NA	NA	TT	CC	CC	CC	TT	CC	CC	TT	CC	CC	CC	CC	CC	CC	CC	CC	CC	CC	CC	TT	CC	CC	CC	CC	CC	CC	CT	CC	CC	CC	CC	CC	CC	CC	CC	TT	CC	CC	CC
14076694|F|0-52:T>C-52:T>C	T/C	VU03	45541776	+	NA	NA	NA	NA	NA	NA	CC	TT	TT	TT	CC	TT	TT	CC	TT	TT	TT	TT	TT	TT	TT	TT	TT	TT	TT	TT	TT	TT	TT	TT	TT	TT	CT	TT	TT	TT	TT	TT	TT	TT	TT	CC	TT	TT	TT
14074284|F|0-15:T>C-15:T>C	T/C	VU03	45580721	+	NA	NA	NA	NA	NA	NA	CC	TT	TT	TT	CC	TT	TT	CC	CT	TT	TT	TT	TT	TT	TT	TT	TT	TT	TT	TT	TT	TT	TT	TT	TT	TT	CT	TT	TT	TT	TT	TT	TT	TT	TT	CC	TT	TT	TT
28497854|F|0-6:A>G-6:A>G	A/G	VU03	45597750	+	NA	NA	NA	NA	NA	NA	GG	AA	AA	AA	GG	AA	AA	GG	AA	AA	AA	AA	AA	AA	AA	AA	AA	AA	AA	AA	AA	AA	AA	AA	AA	AA	AG	AA	AA	AA	AA	AA	AA	AA	AA	GG	AA	AA	AA
42215563|F|0-20:G>A-20:G>A	A	VU03	45649096	+	NA	NA	NA	NA	NA	NA	AA	AA	AA	AA	AA	AA	AA	AA	AA	AA	AA	AA	AA	AA	AA	AA	AA	AA	AA	AA	AA	AA	AA	AA	AA	AA	AA	AA	AA	NN	AA	AA	AA	NN	AA	NN	AA	AA	AA
14084015|F|0-15:G>C-15:G>C	G/C	VU03	45708949	+	NA	NA	NA	NA	NA	NA	GG	GG	GC	GG	GG	GG	GG	GG	GG	GG	CC	GG	GG	CC	GG	GG	GG	GG	GG	GG	CC	GC	GG	GG	GG	GG	GC	CC	GG	GG	GG	CC	GG	GG	GG	GG	GG	GG	GG
14076228|F|0-22:A>G-22:A>G	A/G	VU03	45734417	+	NA	NA	NA	NA	NA	NA	AA	AA	NN	AA	AA	AA	AA	AA	AA	AA	NN	AA	AA	NN	AA	AA	AA	AA	AA	AA	AA	AA	AA	AA	AA	AA	AA	NN	AA	AA	AA	NN	AA	AA	AA	AA	AA	AA	AA
14076228|F|0-41:C>T-41:C>T	C/T	VU03	45734417	+	NA	NA	NA	NA	NA	NA	CC	CC	TT	CC	CC	CC	CC	CC	CC	CC	TT	CC	CC	TT	CC	CC	CC	CC	CC	CC	TT	CT	CC	CC	CC	CC	CC	TT	CC	CC	CC	TT	CC	CC	CC	CC	CC	CC	CC
14058805|F|0-26:C>T-26:C>T	C/T	VU03	45741582	+	NA	NA	NA	NA	NA	NA	CC	CC	CC	CC	CC	CC	CC	CC	CC	CC	CC	CC	CC	CC	CC	CC	CC	CC	CC	CC	CC	CC	CC	CC	CC	CC	CC	CC	CC	CC	CC	CC	CC	CC	CC	NN	CC	CC	CC
14056633|F|0-53:C>T-53:C>T	C/T	VU03	45775506	+	NA	NA	NA	NA	NA	NA	CC	CC	CC	CC	CC	CC	CC	CC	CC	CC	CC	CC	CC	CC	CC	CC	CC	CC	CC	CC	CC	CC	CC	CC	CC	CC	CC	CC	CC	CC	CC	CC	NN	CC	CC	CC	CC	CC	CC
14078777|F|0-20:A>C-20:A>C	A/C	VU03	45848351	+	NA	NA	NA	NA	NA	NA	AA	AA	CC	AA	AA	AA	AA	AA	AA	AA	CC	AA	AA	CC	CC	AA	AA	NN	AA	AA	CC	CC	AA	AC	AA	CC	AA	CC	CC	CC	AA	CC	AA	AA	AA	AA	AA	AA	AA
42215611|F|0-19:G>A-19:G>A	G	VU03	45858789	+	NA	NA	NA	NA	NA	NA	GG	GG	GG	GG	GG	GG	GG	GG	GG	GG	GG	GG	GG	GG	GG	GG	GG	GG	GG	GG	NN	GG	GG	GG	GG	GG	GG	GG	GG	GG	NN	NN	GG	GG	GG	NN	GG	GG	GG
28497878|F|0-30:C>G-30:C>G	C	VU03	46082658	+	NA	NA	NA	NA	NA	NA	CC	CC	CC	CC	CC	CC	CC	CC	CC	CC	CC	CC	CC	CC	CC	CC	CC	CC	CC	CC	CC	CC	CC	CC	CC	CC	CC	CC	CC	CC	CC	CC	CC	CC	CC	CC	CC	CC	CC
25365167|F|0-42:A>G-42:A>G	A/G	VU03	46129045	+	NA	NA	NA	NA	NA	NA	AA	AA	AA	AA	AA	AA	AA	AA	AA	AA	AA	AA	AA	AA	AA	AA	AA	AA	AA	AA	AA	AA	AA	AA	AA	AA	AA	AA	AA	AA	AA	AA	AA	AA	AA	AA	AA	AA	AA
14075602|F|0-59:T>C-59:T>C	T/C	VU03	46207726	+	NA	NA	NA	NA	NA	NA	TT	TT	TT	TT	TT	TT	TT	TT	TT	TT	TT	TT	CC	TT	TT	TT	TT	TT	TT	TT	TT	TT	TT	TT	TT	TT	TT	TT	TT	TT	TT	TT	TT	TT	TT	TT	TT	TT	TT
14084921|F|0-9:T>A-9:T>A	T/A	VU03	46220225	+	NA	NA	NA	NA	NA	NA	TT	TT	TT	TT	TT	TT	TT	TT	TT	TT	TT	TT	TT	TT	TT	TT	TT	TT	TT	TT	TT	TT	TT	TT	TT	TT	TT	TT	TT	TT	TT	TT	TT	TT	TT	TT	TT	TT	TT
14056979|F|0-47:T>A-47:T>A	T/A	VU03	46261471	+	NA	NA	NA	NA	NA	NA	TT	TT	TT	TT	TT	TT	TT	TT	TT	TT	TT	TT	TT	TT	TT	TT	TT	TT	TT	TT	TT	TT	TT	TT	TT	TT	TT	TT	NN	TT	TT	TT	TT	TT	TT	TT	TT	TT	TT
14056979|F|0-53:C>T-53:C>T	C	VU03	46261471	+	NA	NA	NA	NA	NA	NA	CC	CC	CC	CC	CC	CC	CC	CC	CC	CC	CC	CC	CC	CC	CC	CC	CC	CC	CC	CC	CC	CC	CC	CC	CC	CC	CC	CC	NN	CC	CC	CC	CC	CC	CC	CC	CC	CC	CC
25357090|F|0-13:A>T-13:A>T	A	VU03	46266220	+	NA	NA	NA	NA	NA	NA	AA	AA	AA	AA	AA	AA	AA	AA	AA	AA	AA	AA	AA	AA	AA	AA	AA	AA	AA	AA	AA	AA	AA	AA	AA	AA	AA	AA	AA	AA	AA	AA	AA	AA	AA	AA	AA	AA	AA
25357090|F|0-55:G>A-55:G>A	G	VU03	46266220	+	NA	NA	NA	NA	NA	NA	GG	GG	GG	GG	GG	GG	GG	GG	GG	GG	GG	GG	GG	GG	GG	GG	GG	GG	GG	GG	GG	GG	GG	GG	GG	GG	GG	GG	GG	GG	GG	GG	GG	GG	GG	GG	GG	GG	GG
35153886|F|0-59:G>T-59:G>T	T/G	VU03	46266286	+	NA	NA	NA	NA	NA	NA	TT	TT	TT	TT	TT	TT	TT	TT	TT	TT	TT	TT	TT	TT	TT	TT	TT	TT	TT	TT	TT	TT	TT	TT	TT	TT	NN	TT	TT	TT	TT	TT	TT	TT	TT	NN	NN	NN	TT
14057363|F|0-30:G>A-30:G>A	G	VU03	46275670	+	NA	NA	NA	NA	NA	NA	GG	GG	GG	GG	GG	GG	GG	GG	GG	GG	GG	GG	GG	GG	GG	GG	GG	GG	GG	GG	GG	GG	GG	GG	GG	GG	GG	GG	GG	GG	GG	GG	GG	GG	GG	GG	GG	GG	GG
35154794|F|0-13:A>G-13:A>G	G	VU03	46277995	+	NA	NA	NA	NA	NA	NA	GG	GG	GG	GG	GG	GG	GG	NN	GG	GG	GG	GG	GG	GG	GG	GG	GG	GG	GG	NN	GG	NN	GG	GG	NN	GG	GG	GG	GG	GG	NN	NN	NN	GG	NN	NN	GG	NN	GG
100011361|F|0-11:C>T-11:C>T	C/T	VU03	46307469	+	NA	NA	NA	NA	NA	NA	CC	CC	CC	CC	CC	CC	CC	CC	CC	CC	CC	CC	CC	CC	CC	CC	CC	CC	CC	CC	CC	CC	CC	CC	CC	CC	CC	CC	CC	CC	CC	CC	CC	CC	CC	CC	CC	CC	CC
14074517|F|0-66:G>A-66:G>A	G/A	VU03	46386659	+	NA	NA	NA	NA	NA	NA	GG	GG	GG	AA	GG	AA	AA	GG	GG	GG	GG	AA	AA	AA	GG	GG	GG	GG	AA	GG	GG	AA	GG	GG	GG	GG	GG	AA	AA	AA	AA	AA	AA	GG	GG	GG	GG	GG	GG
25364263|F|0-18:A>T-18:A>T	T/A	VU03	46442164	+	NA	NA	NA	NA	NA	NA	TT	TT	TT	TT	TT	TT	TT	TT	TT	TT	TT	TT	TT	TT	TT	TT	TT	TT	TT	TT	TT	TT	TT	TT	TT	TT	TT	TT	TT	TT	TT	TT	TT	TT	TT	TT	TT	TT	TT
25364263|F|0-49:G>C-49:G>C	G/C	VU03	46442164	+	NA	NA	NA	NA	NA	NA	GG	GG	GG	GG	GG	GG	GG	GG	GG	GG	GG	GG	GG	GG	GG	GG	GG	GG	GG	GG	GG	GG	GG	GG	GG	GG	GG	GG	GG	GG	GG	GG	GG	GG	GG	GG	GG	GG	GG
14076523|F|0-13:T>C-13:T>C	T/C	VU03	46456989	+	NA	NA	NA	NA	NA	NA	TT	TT	TT	CC	TT	CC	CC	TT	TT	TT	CC	CC	TT	NN	TT	TT	TT	TT	NN	TT	TT	CT	TT	TT	TT	TT	NN	NN	CC	CC	NN	NN	CC	TT	TT	TT	TT	TT	TT
14054660|F|0-11:A>T-11:A>T	A/T	VU03	46520979	+	NA	NA	NA	NA	NA	NA	AA	AA	AA	AA	AA	AA	AA	AA	AA	AA	AA	AA	AA	AA	AA	AA	AA	AA	AA	AA	AA	AA	AA	AA	AA	AA	AA	AA	AA	AA	AA	AA	AA	AA	AA	AA	AA	AA	AA
14075913|F|0-51:A>T-51:A>T	A/T	VU03	46564041	+	NA	NA	NA	NA	NA	NA	AA	AA	TT	AA	AA	TT	AA	AA	AA	TT	TT	AA	TT	TT	AA	TT	AA	AA	AA	AA	TT	AT	AA	AA	AA	AA	AA	TT	AA	AA	AA	AA	AA	AA	AA	AA	AA	AA	AA
35152762|F|0-31:A>G-31:A>G	A/G	VU03	46709902	+	NA	NA	NA	NA	NA	NA	GG	GG	AA	AA	GG	GG	AA	GG	AA	AA	AA	AA	GG	GG	AA	AA	GG	GG	AA	GG	AA	GG	GG	GG	GG	AA	GG	GG	AA	AA	AA	AA	AA	AA	GG	NN	GG	GG	GG
14074618|F|0-47:C>T-47:C>T	C/T	VU03	46865707	+	NA	NA	NA	NA	NA	NA	TT	TT	CC	CC	TT	TT	CC	TT	TT	CC	CC	CC	CC	CC	TT	CC	TT	TT	CC	TT	CC	CC	TT	CT	TT	TT	TT	CC	CC	CC	TT	CC	CC	TT	TT	TT	TT	TT	TT
14084933|F|0-48:G>T-48:G>T	G/T	VU03	47100981	+	NA	NA	NA	NA	NA	NA	GG	GG	GG	TT	GG	GG	TT	GG	GG	GG	GG	GG	GG	GG	GG	GG	TT	GG	TT	GG	GG	GT	GG	GG	GG	GG	GG	GG	GG	GG	GG	GG	GG	GG	TT	GG	GG	GG	GG
25357127|F|0-17:A>T-17:A>T	A/T	VU03	47119533	+	NA	NA	NA	NA	NA	NA	AA	AA	AA	AA	AA	AA	AA	AA	AA	AA	AA	AA	AA	AA	AA	AA	AA	AA	AA	AA	AA	AA	AA	AA	AA	AA	AA	AA	AA	AA	AA	AA	AA	AA	AA	AA	AA	AA	NN
25364800|F|0-9:C>T-9:C>T	T/C	VU03	47119958	+	NA	NA	NA	NA	NA	NA	TT	TT	TT	TT	TT	TT	TT	TT	TT	TT	TT	TT	TT	TT	TT	TT	TT	TT	TT	TT	TT	TT	TT	TT	TT	TT	TT	TT	TT	TT	TT	TT	TT	TT	TT	TT	TT	TT	TT
14058136|F|0-66:T>C-66:T>C	T/C	VU03	47225086	+	NA	NA	NA	NA	NA	NA	CC	TT	TT	TT	CC	TT	TT	TT	TT	TT	TT	TT	TT	TT	TT	TT	CT	TT	TT	TT	TT	TT	TT	TT	TT	TT	TT	TT	TT	TT	TT	TT	TT	TT	TT	TT	CT	TT	TT
14075684|F|0-14:C>T-14:C>T	C	VU03	47225766	+	NA	NA	NA	NA	NA	NA	CC	CC	CC	CC	CC	CC	CC	CC	CC	CC	CC	CC	CC	CC	CC	CC	CC	CC	CC	CC	CC	CC	CC	CC	CC	CC	CC	CC	CC	CC	CC	CC	CC	CC	CC	CC	CC	CC	CC
14057634|F|0-43:A>T-43:A>T	A/T	VU03	47268661	+	NA	NA	NA	NA	NA	NA	AA	AA	AA	AA	AA	AA	AA	AA	AA	AA	AA	AA	AA	AA	AA	AA	AA	AA	AA	AA	AA	AA	AA	AA	AA	AA	AA	AA	AA	AA	AA	AA	AA	AA	AA	AA	AA	AA	AA
25364192|F|0-10:C>T-10:C>T	C/T	VU03	47299164	+	NA	NA	NA	NA	NA	NA	CC	CC	CC	CC	CC	CC	CC	CC	CC	CC	CC	CC	CC	CC	CC	CC	CC	CC	CC	CC	CC	CC	CC	CC	CC	CC	CC	CC	CC	CC	CC	CC	CC	CC	CC	CC	CC	CC	CC
25364192|F|0-44:T>C-44:T>C	C/T	VU03	47299164	+	NA	NA	NA	NA	NA	NA	CC	CC	CC	CC	CC	CC	CC	CC	CC	CC	CC	CC	CC	CC	CC	CC	CC	CC	CC	CC	CC	CC	CC	CC	CC	CC	CC	CC	CC	CC	CC	CC	CC	CC	CC	CC	CC	CC	CC
14056045|F|0-47:C>T-47:C>T	C	VU03	47303381	+	NA	NA	NA	NA	NA	NA	CC	CC	CC	CC	CC	CC	CC	CC	CC	CC	CC	CC	CC	CC	CC	CC	CC	CC	CC	CC	CC	CC	CC	CC	CC	CC	CC	CC	CC	CC	CC	CC	CC	CC	CC	CC	CC	CC	CC
14060852|F|0-20:C>T-20:C>T	C/T	VU03	47340899	+	NA	NA	NA	NA	NA	NA	CC	CC	TT	CC	CC	TT	CC	CC	CC	CC	CC	TT	CC	CC	CC	CC	CC	CC	CC	CC	TT	CC	CC	CT	CC	CC	CC	CC	TT	TT	CC	TT	TT	CC	CC	CC	CC	CC	CC
25357107|F|0-59:A>T-59:A>T	A/T	VU03	47409988	+	NA	NA	NA	NA	NA	NA	AA	AA	AA	AA	AA	AA	AA	AA	AA	AA	AA	AA	AA	AA	AA	AA	AA	AA	AA	AA	AA	AA	AA	AA	AA	AA	AA	AA	AA	AA	AA	AA	AA	AA	AA	AA	AA	AA	AA
25363929|F|0-26:T>C-26:T>C	T	VU03	47540121	+	NA	NA	NA	NA	NA	NA	TT	TT	TT	TT	TT	TT	TT	TT	TT	TT	TT	TT	TT	TT	TT	TT	TT	TT	TT	TT	TT	TT	TT	TT	TT	TT	TT	TT	TT	TT	TT	TT	TT	TT	TT	TT	TT	TT	TT
14055578|F|0-13:C>A-13:C>A	C	VU03	47566021	+	NA	NA	NA	NA	NA	NA	CC	CC	CC	CC	CC	CC	CC	CC	CC	CC	CC	CC	CC	CC	CC	CC	CC	CC	CC	CC	CC	CC	CC	CC	CC	CC	CC	CC	CC	CC	CC	CC	CC	CC	CC	CC	CC	CC	CC
14082866|F|0-37:C>A-37:C>A	C/A	VU03	47602330	+	NA	NA	NA	NA	NA	NA	CC	CC	AA	CC	CC	CC	CC	CC	CC	CC	AA	AA	AA	AA	AA	AA	CC	CC	CC	CC	AA	AC	CC	CC	CC	CC	CC	AA	CC	CC	CC	CC	CC	CC	AA	CC	CC	CC	CC
14076150|F|0-54:C>A-54:C>A	C/A	VU03	47651179	+	NA	NA	NA	NA	NA	NA	CC	CC	AA	CC	CC	CC	CC	CC	CC	CC	AA	CC	AA	AA	AA	AA	CC	CC	CC	CC	AA	AA	CC	CC	CC	CC	CC	AA	CC	CC	CC	CC	CC	CC	CC	CC	CC	CC	CC
25356067|F|0-7:G>T-7:G>T	G/T	VU03	47728925	+	NA	NA	NA	NA	NA	NA	GG	GG	GG	GG	GG	GG	GG	GG	GG	GG	GG	GG	GG	GG	GG	GG	GG	TT	GG	GG	GG	GG	GG	GG	GG	GG	GT	GG	GG	GG	GG	GG	GG	GG	TT	GG	GG	TT	GG
14073495|F|0-41:G>A-41:G>A	G/A	VU03	47756795	+	NA	NA	NA	NA	NA	NA	AA	GG	GG	GG	AA	GG	GG	AA	AA	GG	GG	GG	GG	GG	GG	GG	AA	AA	GG	AA	GG	GG	AA	AG	AA	AA	AA	GG	GG	GG	GG	GG	GG	GG	GG	NN	AA	AA	AA
25355645|F|0-37:C>T-37:C>T	C	VU03	47790678	+	NA	NA	NA	NA	NA	NA	CC	CC	CC	CC	CC	CC	CC	CC	CC	CC	CC	CC	CC	CC	CC	CC	CC	CC	CC	CC	CC	CC	CC	CC	CC	CC	CC	CC	CC	CC	CC	CC	CC	CC	CC	CC	CC	CC	CC
35152763|F|0-16:A>G-16:A>G	A/G	VU03	47901806	+	NA	NA	NA	NA	NA	NA	AA	AA	AA	AA	AA	AG	AA	AA	AA	AA	GG	AA	GG	GG	GG	GG	AA	AA	AA	AA	AA	GG	AA	AA	AA	NN	AA	GG	AA	AA	AA	AA	AA	AA	AA	NN	AA	AA	AA
25354697|F|0-30:C>A-30:C>A	C/A	VU03	48144552	+	NA	NA	NA	NA	NA	NA	CC	CC	CC	CC	CC	CC	CC	CC	CC	CC	CC	AA	CC	CC	CC	CC	CC	CC	CC	CC	CC	CC	CC	CC	CC	CC	CC	CC	CC	CC	CC	CC	CC	CC	CC	CC	CC	CC	CC
42215568|F|0-59:T>C-59:T>C	T/C	VU03	48329859	+	NA	NA	NA	NA	NA	NA	TT	TT	TT	TT	TT	TT	TT	TT	TT	TT	TT	TT	TT	TT	TT	TT	TT	TT	TT	TT	TT	TT	TT	TT	TT	TT	TT	TT	TT	TT	TT	TT	TT	TT	TT	NN	TT	TT	TT
14074467|F|0-27:C>T-27:C>T	C/T	VU03	48392083	+	NA	NA	NA	NA	NA	NA	CC	CC	CC	CC	TT	CC	CC	TT	CC	CC	CC	CC	CC	CC	CC	CC	CC	TT	CC	CC	CC	CC	CC	CT	CC	CC	TT	CC	CC	CC	CC	CC	CC	CC	TT	CC	CC	CC	CC
25363457|F|0-33:G>A-33:G>A	G	VU03	48400862	+	NA	NA	NA	NA	NA	NA	GG	GG	GG	GG	GG	GG	GG	GG	GG	GG	GG	GG	GG	GG	GG	GG	GG	GG	GG	GG	GG	GG	GG	GG	GG	GG	GG	GG	GG	GG	GG	GG	GG	GG	GG	GG	GG	GG	GG
14085159|F|0-6:G>C-6:G>C	G/C	VU03	48403933	+	NA	NA	NA	NA	NA	NA	GG	GG	GG	GG	CC	GG	GG	CC	GG	GG	GG	GG	GG	GG	GG	GG	GG	CC	GG	GG	GG	GG	GG	GC	GG	GG	CC	GG	GG	GG	GG	GG	GG	GG	CC	NN	GG	GG	GG
14073816|F|0-18:G>A-18:G>A	A/G	VU03	48403999	+	NA	NA	NA	NA	NA	NA	AA	AA	AA	AA	GG	AA	AA	GG	AA	AA	AA	AA	AA	AA	AA	AA	AA	GG	AA	AA	AA	AA	AA	AA	AA	AA	GG	AA	NN	AA	AA	AA	AA	AA	GG	AA	AA	AA	AA
[truncated: 7,211 more rows]
[truncated: 59 more columns]
